# Supplementary material for: Analysis of the Salivary Gland Transcriptome of Frankliniella occidentalis
Source: PLoS One. 2014 Apr 15;9(4):e94447. doi: 10.1371/journal.pone.0094447 (PMC3988053; doi:10.1371/journal.pone.0094447)
Supplement: Table S1 — Frankliniella occidentalis sialotranscriptome contig annotation. The following information is provided for each contig: salivary gland assembly contig ID, InterproScan results, number of GO terms assigned to the protein blast hits by Blast2GO, number of protein blast hits, lowest e-value of any protein blast hit, mean similarity of protein blast hits, protein sequence description assigned by Blast2GO, number of nucleotide blast hits, lowest e-value of any nucleotide blast hit, mean similarity of nucleotide blast hits, nucleotide sequence description assigned by Blast2GO, nucleotide inference, lowest E-value (protein or nucleotide), and highest similarity to protein or nucleotide. (XLSX) [file pone.0094447.s001.xlsx]

## Sheet: column key
Seq. Name	Salivary gland assembly contig ID
IPS Support	InterproScan results: None (no results), Weak (general, e.g., "signal peptide"), Good (specific IPR or Panther ID#), Strong (multiple IPR/Panther IDs)
#GOs	Number of Gene Ontology Terms assigned to protein blast hits by Blast2GO
#Protein Hits	Number of protein blast hits (blastx against swissprot and nr, maximum hits = 20, maximum e-value 1e-05)
Protein min. eValue	Lowest e-value of any protein blast hit
Protein mean similarity	Mean similarity of protein blast hits
Protein Seq. Description	Assigned by Blast2GO from protein blast hits
#Nucleotide Hits	Number of nucleotide blast hits (tblastx against nt, maximum hits = 20, maximum e-value 1e-05)
Nucleotide min. eValue	Lowest e-value of any nucleotide blast hit
Nucleotide mean similarity	Mean similarity of nucleotide blast hits
Nucleotide Seq. Description	Assigned by Blast2GO from nucleotide blast hits
Nucleotide Inference	Based on keyword search (bacteria, cDNA, protein, miscrna, virus, rRNA, ribosomal, cds, gene, "uncertain" if none of the above)
Lower e-value	Based on comparison of Protein and Nucleotide min e-values
Higher similarity	Based on comparison of Protein and Nucleotide mean similarities

## Sheet: annotation
Seq. Name	IPS Support	#GOs	#Protein Hits	Protein min. eValue	Protein mean similarity	Protein Seq. Description	#Nucleotide Hits	Nucleotide min. eValue	Nucleotide mean similarity	Nucleotide Seq. Description	Nucleotide Inference	Lower e-value	Higher similarity
THRIPS_11_08_2011_00004	Weak	2	20	1.99946e-50	0.7575	pg1 homology to homo sapiens	20	4.0646e-102	0.991	uncultured bacterium clone nbw417c10c1 16s ribosomal rna partial sequence	bacterial	nucl	nucl
THRIPS_11_08_2011_00005	None	1	14	8.55334e-17	0.757143	conserved protein	20	1.57358e-85	0.9125	uncultured bacterium clone a1-e7 16s ribosomal rna partial sequence	bacterial	nucl	nucl
THRIPS_11_08_2011_00013	None	2	17	1.28334e-12	0.740588	conserved protein	20	6.73403e-35	0.914	uncultured bacterium clone nbw1048d07c1 16s ribosomal rna partial sequence	bacterial	nucl	nucl
THRIPS_11_08_2011_00015	None	0	20	1.75782e-47	0.6745	leucine rich protein	20	0	0.823	dechloromonas aromatica complete genome	uncertain	nucl	nucl
THRIPS_11_08_2011_00016	None	0	20	3.84132e-24	0.626	conserved protein	20	6.88268e-91	0.8795	delftia acidovorans atcc:9355 16s ribosomal rna partial sequence 16s-23s ribosomal intergenic complete sequence and 23s ribosomal rna partial sequence	rRNA	nucl	nucl
THRIPS_11_08_2011_00017	Weak	0	0			---NA---	0			---NA---	none
THRIPS_11_08_2011_00018	Good	3	8	5.64924e-18	0.66625	vit2_peram ame: full=vitellogenin-2 short=vg-2 flags: precursor	20	2.04885e-24	0.703	culex quinquefasciatus vitellogenin- mrna	protein	nucl	nucl
THRIPS_11_08_2011_00019	Weak	1	8	3.69533e-17	0.7125	vit1_solin ame: full=vitellogenin-1 ame: full=vitellogenin short=vg flags: precursor	20	3.66798e-25	0.822	culex quinquefasciatus vitellogenin- mrna	protein	nucl	nucl
THRIPS_11_08_2011_00020	Strong	3	8	1.10917e-32	0.5675	vit_antgr ame: full=vitellogenin contains: ame: full=yp47 contains: ame: full=yp160 flags: precursor	20	7.44884e-62	0.695	tsa: apis mellifera mrna sequence	protein	nucl	nucl
THRIPS_11_08_2011_00021	Strong	2	20	2.75074e-151	0.4215	vit1_peram ame: full=vitellogenin-1 short=vg-1 flags: precursor	20	0	0.693	culex quinquefasciatus vitellogenin- mrna	protein	nucl	nucl
THRIPS_11_08_2011_00022	Good	19	20	0	0.5015	vit1_peram ame: full=vitellogenin-1 short=vg-1 flags: precursor	20	0	0.7185	nasonia vitripennis vitellogenin mrna	protein	nucl	nucl
THRIPS_11_08_2011_00023	Good	20	12	7.07534e-53	0.660833	vit1_peram ame: full=vitellogenin-1 short=vg-1 flags: precursor	20	3.35697e-126	0.7345	tsa: apis mellifera mrna sequence	protein	nucl	nucl
THRIPS_11_08_2011_00024	Strong	2	20	2.63211e-157	0.424	vit1_peram ame: full=vitellogenin-1 short=vg-1 flags: precursor	20	0	0.67	culex quinquefasciatus vitellogenin- mrna	protein	nucl	nucl
THRIPS_11_08_2011_00025	None	0	0			---NA---	0			---NA---	none
THRIPS_11_08_2011_00026	None	0	0			---NA---	0			---NA---	none
THRIPS_11_08_2011_00027	Strong	14	20	4.47568e-33	0.4865	aqp4_mouse ame: full=aquaporin-4 short=aqp-4 ame: full=mercurial-insensitive water channel short=miwc ame: full=wch4	20	5.41532e-65	0.685	tsa: apis mellifera mrna sequence	protein	nucl	nucl
THRIPS_11_08_2011_00028	None	0	0			---NA---	0			---NA---	none
THRIPS_11_08_2011_00029	None	0	0			---NA---	0			---NA---	none
THRIPS_11_08_2011_00030	None	0	0			---NA---	0			---NA---	none
THRIPS_11_08_2011_00031	Strong	7	20	6.24285e-36	0.6495	nu5m_aedae ame: full=nadh-ubiquinone oxidoreductase chain 5 ame: full=nadh dehydrogenase subunit 5	20	3.9801e-67	0.698	thrips imaginis complete genome	uncertain	nucl	nucl
THRIPS_11_08_2011_00032	Strong	7	20	1.32533e-70	0.669	nu5m_aedae ame: full=nadh-ubiquinone oxidoreductase chain 5 ame: full=nadh dehydrogenase subunit 5	20	0	0.7235	thrips imaginis complete genome	uncertain	nucl	nucl
THRIPS_11_08_2011_00033	Weak	3	20	2.97532e-25	0.705	cyb_samcr ame: full=cytochrome b ame: full=complex iii subunit 3 ame: full=complex iii subunit iii ame: full=cytochrome b-c1 complex subunit 3 ame: full=ubiquinol-cytochrome-c reductase complex cytochrome b subunit	20	1.66618e-32	0.914	thrips imaginis complete genome	uncertain	nucl	nucl
THRIPS_11_08_2011_00034	Weak	1	20	9.28099e-15	0.681	cyb_anoga ame: full=cytochrome b ame: full=complex iii subunit 3 ame: full=complex iii subunit iii ame: full=cytochrome b-c1 complex subunit 3 ame: full=ubiquinol-cytochrome-c reductase complex cytochrome b subunit	20	4.54716e-21	0.679	uroctonus mordax complete genome	uncertain	nucl	prot
THRIPS_11_08_2011_00035	None	0	0			---NA---	0			---NA---	none
THRIPS_11_08_2011_00036	None	0	0			---NA---	0			---NA---	none
THRIPS_11_08_2011_00037	Weak	0	0			---NA---	0			---NA---	none
THRIPS_11_08_2011_00038	Weak	0	0			---NA---	0			---NA---	none
THRIPS_11_08_2011_00039	Weak	0	0			---NA---	0			---NA---	none
THRIPS_11_08_2011_00040	None	0	0			---NA---	0			---NA---	none
THRIPS_11_08_2011_00041	None	0	0			---NA---	0			---NA---	none
THRIPS_11_08_2011_00042	Weak	0	1	3.17479e-08	0.43	cg14803 cg14803-pa	0			---NA---	none	prot only	prot only
THRIPS_11_08_2011_00043	None	0	0			---NA---	0			---NA---	none
THRIPS_11_08_2011_00044	None	0	0			---NA---	1	2.27393e-15	0.95	phakopsora pachyrhizi clone jgiafna- complete sequence	uncertain	nucl only	nucl only
THRIPS_11_08_2011_00045	Strong	36	20	0	0.7435	mysa_drome ame: full=myosin heavy muscle	20	0	0.94	tsa: apis mellifera mrna sequence	protein	nucl	nucl
THRIPS_11_08_2011_00046	Strong	38	20	0	0.7745	mysa_drome ame: full=myosin heavy muscle	20	0	0.942	tsa: apis mellifera mrna sequence	protein	nucl	nucl
THRIPS_11_08_2011_00047	None	0	0			---NA---	0			---NA---	none
THRIPS_11_08_2011_00048	None	0	0			---NA---	0			---NA---	none
THRIPS_11_08_2011_00049	Weak	0	0			---NA---	0			---NA---	none
THRIPS_11_08_2011_00050	Strong	21	20	1.80521e-59	0.8685	vatl_drome ame: full=v-type proton atpase 16 kda proteolipid subunit short=v-atpase 16 kda proteolipid subunit short=vha16k ame: full=ductin ame: full=vacuolar proton pump 16 kda proteolipid subunit	20	0	0.949	tsa: apis mellifera mrna sequence	protein	nucl	nucl
THRIPS_11_08_2011_00051	Strong	11	15	1.95199e-176	0.678	copd_mouse ame: full=coatomer subunit delta ame: full=archain ame: full=delta-coat protein short=delta-cop	20	0	0.7785	tsa: apis mellifera mrna sequence	protein	nucl	nucl
THRIPS_11_08_2011_00052	None	0	0			---NA---	0			---NA---	none
THRIPS_11_08_2011_00053	Weak	0	0			---NA---	0			---NA---	none
THRIPS_11_08_2011_00054	Strong	34	20	5.07158e-179	0.66	hipk2_mesau ame: full=homeodomain-interacting protein kinase 2 ame: full=mx-interacting protein kinase ame: full=pkm	20	0	0.862	nasonia vitripennis ensangp00000009506 mrna	protein	nucl	nucl
THRIPS_11_08_2011_00055	Strong	19	20	0	0.681	rpb1_drome ame: full=dna-directed rna polymerase ii subunit rpb1 short=rna polymerase ii subunit b1 ame: full=dna-directed rna polymerase iii largest subunit	20	0	0.941	tsa: apis mellifera mrna sequence	protein	nucl	nucl
THRIPS_11_08_2011_00056	Good	15	14	4.99438e-14	0.867143	klc_lolpe ame: full=kinesin light chain short=klc	20	8.46614e-18	0.9315	tsa: apis mellifera mrna sequence	protein	nucl	nucl
THRIPS_11_08_2011_00057	Weak	1	17	3.12072e-21	0.438824	pol_sfv1 ame: full=pro-pol polyprotein ame: full=pr125pol contains: ame: full=protease reverse transcriptase ribonuclease h ame: full=p87pro-rt-r contains: ame: full=protease reverse transcriptase ame: full=p65pro-rt contains: ame: full=ribonuclease h short=rnase h contains: ame: full=integrase short=in ame: full=p42in	20	2.62968e-15	0.4825	perkinsus marinus atcc 50983 retrovirus mrna	virus	prot	nucl
THRIPS_11_08_2011_00058	Strong	4	1	2.94554e-06	0.65	aff4_dromo ame: full=af4 fmr2 family member 4 ame: full=protein lilliputian	15	1.4742e-12	0.539333	tsa: apis mellifera mrna sequence	protein	nucl	prot
THRIPS_11_08_2011_00059	Strong	9	9	1.81101e-11	0.552222	aff4_dromo ame: full=af4 fmr2 family member 4 ame: full=protein lilliputian	20	1.6536e-33	0.7185	tsa: apis mellifera mrna sequence	protein	nucl	nucl
THRIPS_11_08_2011_00060	Strong	24	20	1.77116e-71	0.6725	sqd_drome ame: full=rna-binding protein squid ame: full=heterogeneous nuclear ribonucleoprotein 40 short=hnrnp 40	20	4.91383e-99	0.9435	tsa: apis mellifera mrna sequence	protein	nucl	nucl
THRIPS_11_08_2011_00061	None	2	7	1.96764e-09	0.69	variant g	7	2.80018e-11	0.61	blattella germanica mrna for variant g (sqd gene)	protein	nucl	prot
THRIPS_11_08_2011_00062	Good	1	20	3.10427e-61	0.479	polx_tobac ame: full=retrovirus-related pol polyprotein from transposon tnt 1-94 includes: ame: full=protease includes: ame: full=reverse transcriptase includes: ame: full=endonuclease	20	4.05729e-70	0.611	medicago truncatula clone mth2- complete sequence	uncertain	nucl	nucl
THRIPS_11_08_2011_00066	Strong	18	20	7.28103e-84	0.5285	zo1_canfa ame: full=tight junction protein zo-1 ame: full=tight junction protein 1 ame: full=zona occludens protein 1 ame: full=zonula occludens protein 1	20	0	0.897	drosophila melanogaster polychaetoid transcript variant mrna	protein	nucl	nucl
THRIPS_11_08_2011_00067	Weak	0	0			---NA---	0			---NA---	none
THRIPS_11_08_2011_00068	Strong	5	4	7.09258e-25	0.5225	ma2a1_human ame: full=alpha-mannosidase 2 ame: full=golgi alpha-mannosidase ii short=aman ii short=man ii ame: full=mannosidase alpha class 2a member 1 ame: full=mannosyl-oligosaccharide - -alpha-mannosidase	20	1.76487e-30	0.809	bos taurus cg6206-like mrna	protein	nucl	nucl
THRIPS_11_08_2011_00069	Strong	49	20	6.83024e-24	0.8705	rl40_drome ame: full=ubiquitin-60s ribosomal protein l40 ame: full=cep52 contains: ame: full=ubiquitin contains: ame: full=60s ribosomal protein l40 flags: precursor	20	5.89473e-29	0.9595	drosophila melanogaster chromosome complete sequence	uncertain	nucl	nucl
THRIPS_11_08_2011_00070	Strong	2	1	6.10281e-13	0.54	ymd3_caeel ame: full= uncharacterized transposon-derived protein	20	1.60607e-39	0.614	caenorhabditis elegans cosmid complete sequence	uncertain	nucl	nucl
THRIPS_11_08_2011_00071	Weak	0	0			---NA---	0			---NA---	none
THRIPS_11_08_2011_00072	Weak	8	11	1.72326e-08	0.378182	dspp_human ame: full=dentin sialophosphoprotein contains: ame: full=dentin phosphoprotein ame: full=dentin phosphophoryn short=dpp contains: ame: full=dentin sialoprotein short=dsp flags: precursor	0			---NA---	none	prot only	prot only
THRIPS_11_08_2011_00073	Weak	0	0			---NA---	0			---NA---	none
THRIPS_11_08_2011_00074	Weak	11	20	3.99055e-167	0.752	ddx17_drome ame: full=atp-dependent rna helicase p62	20	0	0.8185	tsa: apis mellifera mrna sequence	protein	nucl	nucl
THRIPS_11_08_2011_00075	Weak	2	9	4.13965e-59	0.462222	insulin receptor substrate 1-b	4	2.07316e-45	0.7625	tsa: bemisia tabaci bt_q_zju_singletons36219 mrna sequence	protein	prot	nucl
THRIPS_11_08_2011_00076	Weak	1	20	2.94689e-49	0.7615	cell wall-associated hydrolase	20	8.52136e-72	0.8995	polaromonas naphthalenivorans complete genome	uncertain	nucl	nucl
THRIPS_11_08_2011_00078	Strong	1	4	2.53296e-31	0.645	gs1_drome ame: full=gs1-like protein	20	9.21874e-46	0.796	tsa: acyrthosiphon pisum strain lsr1 mrna sequence	protein	nucl	nucl
THRIPS_11_08_2011_00079	Weak	8	20	0	0.656	if2p_human ame: full=eukaryotic translation initiation factor 5b short=eif-5b ame: full=translation initiation factor if-2	20	0	0.912	tsa: apis mellifera mrna sequence	protein	nucl	nucl
THRIPS_11_08_2011_00080	Strong	14	20	0	0.8425	dhsa_rat ame: full=succinate dehydrogenase flavoprotein mitochondrial ame: full=flavoprotein subunit of complex ii short=fp flags: precursor	20	0	0.9405	tsa: apis mellifera mrna sequence	protein	nucl	nucl
THRIPS_11_08_2011_00081	None	0	0			---NA---	0			---NA---	none
THRIPS_11_08_2011_00082	Strong	43	20	3.35317e-135	0.5875	macf1_human ame: full=microtubule-actin cross-linking factor isoforms 1 2 3 5 ame: full=620 kda actin-binding protein short=abp620 ame: full=actin cross-linking family protein 7 ame: full=macrophin-1 ame: full=trabeculin-alpha	20	0	0.9345	tsa: apis mellifera mrna sequence	protein	nucl	nucl
THRIPS_11_08_2011_00083	Strong	41	20	2.98608e-136	0.5665	macf1_human ame: full=microtubule-actin cross-linking factor isoforms 1 2 3 5 ame: full=620 kda actin-binding protein short=abp620 ame: full=actin cross-linking family protein 7 ame: full=macrophin-1 ame: full=trabeculin-alpha	20	0	0.9345	tsa: apis mellifera mrna sequence	protein	nucl	nucl
THRIPS_11_08_2011_00084	Weak	0	0			---NA---	0			---NA---	none
THRIPS_11_08_2011_00085	Good	64	20	1.17991e-67	0.8665	ndka_droya ame: full=nucleoside diphosphate kinase short=ndk short=ndp kinase ame: full=abnormal wing disks protein	20	6.57802e-85	0.8745	choristoneura parallela abnormal wing disc-like protein complete cds	protein	nucl	nucl
THRIPS_11_08_2011_00086	Weak	0	0			---NA---	0			---NA---	none
THRIPS_11_08_2011_00087	None	0	0			---NA---	0			---NA---	none
THRIPS_11_08_2011_00088	Strong	23	20	6.84207e-77	0.77	rab37_human ame: full=ras-related protein rab-37	20	1.61881e-89	0.913	drosophila melanogaster rab26 transcript variant mrna	protein	nucl	nucl
THRIPS_11_08_2011_00089	Strong	8	20	9.57387e-49	0.5195	lph_rabit ame: full=lactase-phlorizin hydrolase ame: full=lactase-glycosylceramidase includes: ame: full=lactase includes: ame: full=phlorizin hydrolase flags: precursor	20	5.13198e-62	0.6675	tribolium castaneum beta-glucosidase mrna	protein	nucl	nucl
THRIPS_11_08_2011_00090	Strong	19	20	3.63e-68	0.6545	myro1_brebr ame: full=myrosinase 1 ame: full=beta-glucosidase 1 ame: full=beta-thioglucosidase 1 ame: full=beta-thioglucosidase glucohydrolase 1 ame: full=sinigrinase 1 ame: full=thioglucosidase 1	20	1.24299e-93	0.728	tribolium castaneum beta-glucosidase mrna	protein	nucl	nucl
THRIPS_11_08_2011_00091	None	0	0			---NA---	0			---NA---	none
THRIPS_11_08_2011_00092	None	0	0			---NA---	0			---NA---	none
THRIPS_11_08_2011_00093	None	0	0			---NA---	0			---NA---	none
THRIPS_11_08_2011_00094	None	0	0			---NA---	0			---NA---	none
THRIPS_11_08_2011_00095	Strong	97	20	3.72581e-110	0.5435	rhbt1_human ame: full=rho-related btb domain-containing protein 1	20	0	0.877	tsa: apis mellifera mrna sequence	protein	nucl	nucl
THRIPS_11_08_2011_00096	Strong	17	20	8.47421e-98	0.639	zfr_mouse ame: full=zinc finger rna-binding protein	20	0	0.8985	tsa: apis mellifera mrna sequence	protein	nucl	nucl
THRIPS_11_08_2011_00097	Strong	17	20	8.67616e-98	0.639	zfr_mouse ame: full=zinc finger rna-binding protein	20	0	0.8985	tsa: apis mellifera mrna sequence	protein	nucl	nucl
THRIPS_11_08_2011_00098	None	0	0			---NA---	0			---NA---	none
THRIPS_11_08_2011_00099	Weak	0	0			---NA---	0			---NA---	none
THRIPS_11_08_2011_00100	None	0	0			---NA---	0			---NA---	none
THRIPS_11_08_2011_00101	None	0	3	6.7756e-22	0.71	hypothetical protein AcavDRAFT_4806 [Acidovorax avenae subsp. avenae ATCC 19860]	20	4.7904e-46	0.98	uncultured organism clone sipclo_kg74 16s ribosomal rna partial sequence	rRNA	nucl	nucl
THRIPS_11_08_2011_00102	None	0	0			---NA---	1	1.47686e-07	0.8	trifolium repens clone ca307 microsatellite sequence	uncertain	nucl only	nucl only
THRIPS_11_08_2011_00103	None	0	0			---NA---	1	1.06158e-07	0.8	trifolium repens clone ca307 microsatellite sequence	uncertain	nucl only	nucl only
THRIPS_11_08_2011_00104	Strong	3	10	1.63149e-33	0.578	vit3_solin ame: full=vitellogenin-3 flags: precursor	20	1.6766e-53	0.7225	nasonia vitripennis vitellogenin mrna	protein	nucl	nucl
THRIPS_11_08_2011_00105	Weak	0	0			---NA---	0			---NA---	none
THRIPS_11_08_2011_00106	Strong	10	20	2.27691e-142	0.555	at10d_human ame: full=probable phospholipid-transporting atpase vd ame: full=atpase class v type 10d	20	0	0.8865	tsa: apis mellifera mrna sequence	protein	nucl	nucl
THRIPS_11_08_2011_00107	Good	13	12	6.35227e-17	0.689167	rl13_spofr ame: full=60s ribosomal protein l13	20	1.49523e-25	0.808	tsa: apis mellifera mrna sequence	protein	nucl	nucl
THRIPS_11_08_2011_00108	Strong	16	11	2.68485e-25	0.593636	5ntd_lutlo ame: full=protein 5nuc includes: ame: full=udp-sugar hydrolase ame: full=udp-sugar diphosphatase ame: full=udp-sugar pyrophosphatase includes: ame: full=5 -nucleotidase short=5 -nt flags: precursor	20	1.53045e-36	0.7595	tsa: apis mellifera mrna sequence	protein	nucl	nucl
THRIPS_11_08_2011_00109	Strong	17	20	2.15343e-47	0.655	gnpat_bovin ame: full=dihydroxyacetone phosphate acyltransferase short=dap-at short=dhap-at ame: full=acyl- :dihydroxyacetonephosphateacyltransferase ame: full=glycerone-phosphate o-acyltransferase	20	4.34673e-59	0.79	pediculus humanus corporis dihydroxyacetone phosphate mrna	protein	nucl	nucl
THRIPS_11_08_2011_00110	Weak	0	0			---NA---	4	3.16581e-52	1	frankliniella occidentalis voucher 18s ribosomal rna partial sequence internal transcribed spacer ribosomal rna and internal transcribed spacer complete sequence and 28s ribosomal rna partial sequence	rRNA	nucl only	nucl only
THRIPS_11_08_2011_00111	None	0	0			---NA---	4	4.34639e-40	0.98	frankliniella occidentalis voucher 18s ribosomal rna partial sequence internal transcribed spacer ribosomal rna and internal transcribed spacer complete sequence and 28s ribosomal rna partial sequence	rRNA	nucl only	nucl only
THRIPS_11_08_2011_00112	Weak	0	0			---NA---	0			---NA---	none
THRIPS_11_08_2011_00113	Strong	36	20	1.1699e-102	0.662	brd4_mouse ame: full=bromodomain-containing protein 4 ame: full=mitotic chromosome-associated protein short=mcap	20	0	0.8865	tsa: apis mellifera mrna sequence	protein	nucl	nucl
THRIPS_11_08_2011_00114	Weak	0	0			---NA---	0			---NA---	none
THRIPS_11_08_2011_00116	Weak	0	0			---NA---	0			---NA---	none
THRIPS_11_08_2011_00117	Strong	8	16	9.67804e-38	0.590625	sng1_human ame: full=synaptogyrin-1	20	4.4753e-85	0.83	tsa: apis mellifera mrna sequence	protein	nucl	nucl
THRIPS_11_08_2011_00118	Weak	0	0			---NA---	0			---NA---	none
THRIPS_11_08_2011_00119	Strong	43	20	6.43933e-169	0.9885	ubc_pig ame: full=polyubiquitin-c contains: ame: full=ubiquitin-related contains: ame: full=ubiquitin flags: precursor	20	0	1	strongylocentrotus purpuratus ubiquitin c variant mrna	protein	nucl	nucl
THRIPS_11_08_2011_00120	Strong	45	20	0	0.978	ubc_bovin ame: full=polyubiquitin-c contains: ame: full=ubiquitin-related contains: ame: full=ubiquitin flags: precursor	20	0	1	strongylocentrotus purpuratus ubiquitin c variant mrna	protein	nucl	nucl
THRIPS_11_08_2011_00121	Good	8	11	1.4377e-41	0.533636	clc_drome ame: full=clathrin light chain ame: full=dclc	20	4.34285e-68	0.8775	tsa: apis mellifera mrna sequence	protein	nucl	nucl
THRIPS_11_08_2011_00122	Strong	13	15	4.87781e-89	0.597333	spt6h_human ame: full=transcription elongation factor spt6 short=hspt6 ame: full=tat-cotransactivator 2 protein short=tat-ct2 protein	20	2.93798e-130	0.8555	tsa: apis mellifera mrna sequence	protein	nucl	nucl
THRIPS_11_08_2011_00123	Good	4	8	1.00959e-16	0.43375	tada3_xentr ame: full=transcriptional adapter 3 ame: full=ada3 homolog ame: full=transcriptional adapter 3-like short=ada3-like protein	20	2.72558e-15	0.62	xenopus laevis transcriptional adaptor 3 (tada3-b) mrna	protein	prot	nucl
THRIPS_11_08_2011_00124	None	1	20	1.49173e-59	0.7275	pg1 protein	20	2.31258e-110	0.93	uncultured streptococcus clone av_4s-e03 16s ribosomal rna partial sequence	rRNA	nucl	nucl
THRIPS_11_08_2011_00125	Strong	6	20	0	0.688	sps1_drome ame: full= water dikinase ame: full=protein patufet ame: full=selenium donor protein ame: full=selenophosphate synthase ame: full=d	20	0	0.957	tsa: apis mellifera mrna sequence	protein	nucl	nucl
THRIPS_11_08_2011_00126	None	0	0			---NA---	0			---NA---	none
THRIPS_11_08_2011_00127	None	0	0			---NA---	0			---NA---	none
THRIPS_11_08_2011_00128	Weak	0	0			---NA---	0			---NA---	none
THRIPS_11_08_2011_00129	Weak	0	0			---NA---	0			---NA---	none
THRIPS_11_08_2011_00130	None	0	0			---NA---	5	5.68451e-07	0.542	ustilago scitaminea microsatellite locus m 21	uncertain	nucl only	nucl only
THRIPS_11_08_2011_00131	Strong	49	20	0	0.887	tera_drome ame: full=transitional endoplasmic reticulum atpase ter94 ame: full=valosin-containing protein homolog	20	0	0.9705	tsa: apis mellifera mrna sequence	protein	nucl	nucl
THRIPS_11_08_2011_00132	Weak	0	0			---NA---	0			---NA---	none
THRIPS_11_08_2011_00133	None	0	0			---NA---	0			---NA---	none
THRIPS_11_08_2011_00134	Strong	7	7	3.72131e-55	0.461429	smg5_human ame: full=protein smg5 ame: full=est1-like protein b ame: full=lpts-rp1 ame: full=lpts-interacting protein ame: full=smg-5 homolog short=hsmg-5	20	5.43274e-82	0.6985	tsa: apis mellifera mrna sequence	protein	nucl	nucl
THRIPS_11_08_2011_00135	Weak	0	4	3.06216e-37	0.5975	clld6_human ame: full=chronic lymphocytic leukemia deletion region gene 6 protein short=cll deletion region gene 6 protein	20	9.1094e-60	0.7695	tsa: apis mellifera mrna sequence	protein	nucl	nucl
THRIPS_11_08_2011_00136	Weak	0	0			---NA---	0			---NA---	none
THRIPS_11_08_2011_00137	None	0	0			---NA---	0			---NA---	none
THRIPS_11_08_2011_00138	Weak	12	20	1.54443e-92	0.674	znt7_chick ame: full=zinc transporter 7 short= -7 ame: full=solute carrier family 30 member 7	20	2.12011e-144	0.8945	tribolium castaneum cation efflux protein zinc transporter mrna	protein	nucl	nucl
THRIPS_11_08_2011_00139	None	0	0			---NA---	0			---NA---	none
THRIPS_11_08_2011_00140	None	0	5	7.01803e-15	0.842	unknown [Glycine max]	20	2.26083e-115	0.9975	ssu20513scolecobasidium small subunit ribosomal rna partial sequence	rRNA	nucl	nucl
THRIPS_11_08_2011_00141	None	0	0			---NA---	0			---NA---	none
THRIPS_11_08_2011_00143	Weak	0	0			---NA---	0			---NA---	none
THRIPS_11_08_2011_00144	Strong	2	14	3.1918e-69	0.57	y1505_drome ame: full=la-related protein cg11505 ame: full=la ribonucleoprotein domain family member cg11505	20	7.93073e-120	0.955	tsa: apis mellifera mrna sequence	protein	nucl	nucl
THRIPS_11_08_2011_00145	Weak	0	0			---NA---	0			---NA---	none
THRIPS_11_08_2011_00146	None	0	0			---NA---	0			---NA---	none
THRIPS_11_08_2011_00147	Weak	0	0			---NA---	0			---NA---	none
THRIPS_11_08_2011_00148	Weak	0	19	1.0641e-33	0.685263	conserved domain protein	20	8.5418e-42	0.897	tsa: arachis duranensis mrna sequence	protein	nucl	nucl
THRIPS_11_08_2011_00149	None	0	0			---NA---	0			---NA---	none
THRIPS_11_08_2011_00150	Good	0	0			---NA---	0			---NA---	none
THRIPS_11_08_2011_00151	Weak	0	0			---NA---	0			---NA---	none
THRIPS_11_08_2011_00152	None	0	0			---NA---	0			---NA---	none
THRIPS_11_08_2011_00153	Strong	18	20	2.86885e-129	0.635	hsdl2_xenla ame: full=hydroxysteroid dehydrogenase-like protein 2	20	9.81765e-173	0.8595	aedes aegypti short-chain dehydrogenase partial mrna	protein	nucl	nucl
THRIPS_11_08_2011_00154	None	0	0			---NA---	0			---NA---	none
THRIPS_11_08_2011_00155	Good	2	3	7.01839e-14	0.493333	ypd1_caeel ame: full=uncharacterized protein	20	1.28324e-43	0.63	tsa: apis mellifera mrna sequence	protein	nucl	nucl
THRIPS_11_08_2011_00156	Weak	0	0			---NA---	0			---NA---	none
THRIPS_11_08_2011_00157	Weak	8	1	1.78859e-07	0.43	nfh_human ame: full=neurofilament heavy polypeptide short=nf-h ame: full=200 kda neurofilament protein ame: full=neurofilament triplet h protein	20	4.12289e-70	0.572	tsa: bemisia tabaci bt_q_zju_singletons36289 mrna sequence	protein	nucl	nucl
THRIPS_11_08_2011_00158	Weak	0	0			---NA---	0			---NA---	none
THRIPS_11_08_2011_00159	Weak	3	20	2.21951e-71	0.7685	cyb_elimo ame: full=cytochrome b ame: full=complex iii subunit 3 ame: full=complex iii subunit iii ame: full=cytochrome b-c1 complex subunit 3 ame: full=ubiquinol-cytochrome-c reductase complex cytochrome b subunit	20	5.7566e-108	0.848	thrips imaginis complete genome	uncertain	nucl	nucl
THRIPS_11_08_2011_00160	Weak	0	0			---NA---	0			---NA---	none
THRIPS_11_08_2011_00161	None	0	0			---NA---	0			---NA---	none
THRIPS_11_08_2011_00162	Weak	0	0			---NA---	0			---NA---	none
THRIPS_11_08_2011_00163	None	0	0			---NA---	0			---NA---	none
THRIPS_11_08_2011_00164	Weak	0	0			---NA---	0			---NA---	none
THRIPS_11_08_2011_00165	None	0	0			---NA---	0			---NA---	none
THRIPS_11_08_2011_00166	None	0	0			---NA---	0			---NA---	none
THRIPS_11_08_2011_00167	Strong	2	2	3.5637e-39	0.855	ubl3_human ame: full=ubiquitin-like protein 3 ame: full=membrane-anchored ubiquitin-fold protein short= short=mub ame: full=protein hcg-1 flags: precursor	20	2.05078e-59	0.946	tsa: apis mellifera mrna sequence	protein	nucl	nucl
THRIPS_11_08_2011_00168	Good	24	20	4.48547e-60	0.805	skp1_rat ame: full=s-phase kinase-associated protein 1 ame: full=cyclin-a cdk2-associated protein p19 ame: full=s-phase kinase-associated protein 1a ame: full=p19a ame: full=p19skp1	20	1.63352e-77	0.9655	tsa: apis mellifera mrna sequence	protein	nucl	nucl
THRIPS_11_08_2011_00169	Weak	0	0			---NA---	0			---NA---	none
THRIPS_11_08_2011_00170	None	0	0			---NA---	0			---NA---	none
THRIPS_11_08_2011_00171	Strong	11	9	1.90146e-92	0.634444	ctns_drome ame: full=cystinosin homolog	20	7.70044e-109	0.834	tsa: apis mellifera mrna sequence	protein	nucl	nucl
THRIPS_11_08_2011_00172	None	0	0			---NA---	0			---NA---	none
THRIPS_11_08_2011_00173	Weak	12	20	4.71305e-25	0.8955	rl30_brabe ame: full=60s ribosomal protein l30	20	2.54457e-53	0.966	tsa: crepidula fornicata	uncertain	nucl	nucl
THRIPS_11_08_2011_00174	Good	5	19	3.80519e-39	0.571579	bccip_drome ame: full=protein bccip homolog	20	4.11066e-54	0.7425	tsa: apis mellifera mrna sequence	protein	nucl	nucl
THRIPS_11_08_2011_00175	None	0	0			---NA---	0			---NA---	none
THRIPS_11_08_2011_00176	Weak	0	0			---NA---	0			---NA---	none
THRIPS_11_08_2011_00177	Strong	32	20	1.32262e-130	0.7755	mdhm_human ame: full=malate mitochondrial flags: precursor	20	0	0.876	tsa: apis mellifera mrna sequence	protein	nucl	nucl
THRIPS_11_08_2011_00178	Weak	0	0			---NA---	0			---NA---	none
THRIPS_11_08_2011_00179	None	0	0			---NA---	0			---NA---	none
THRIPS_11_08_2011_00180	Good	0	1	2.24188e-14	0.74	opa32_drome ame: full= opa3-like protein cg13603	20	7.77364e-21	0.764	tsa: bemisia tabaci bt_q_zju_singletons33294 mrna sequence	protein	nucl	nucl
THRIPS_11_08_2011_00181	None	0	0			---NA---	0			---NA---	none
THRIPS_11_08_2011_00182	Weak	0	0			---NA---	0			---NA---	none
THRIPS_11_08_2011_00183	Weak	0	0			---NA---	0			---NA---	none
THRIPS_11_08_2011_00184	Good	8	13	8.38277e-21	0.596154	zfy21_bovin ame: full=zinc finger fyve domain-containing protein 21	20	1.10395e-32	0.681	strongylocentrotus purpuratus mgc83954 protein mrna	protein	nucl	nucl
THRIPS_11_08_2011_00185	Weak	4	20	3.34709e-29	0.625	adenylate cyclase type 9	20	1.55555e-32	0.7915	tsa: apis mellifera mrna sequence	protein	nucl	nucl
THRIPS_11_08_2011_00186	Weak	0	0			---NA---	0			---NA---	none
THRIPS_11_08_2011_00187	None	0	0			---NA---	0			---NA---	none
THRIPS_11_08_2011_00188	None	0	0			---NA---	0			---NA---	none
THRIPS_11_08_2011_00189	Weak	11	5	1.15548e-10	0.876	ken1_culqu ame: full=transcription factor ken 1	20	1.54133e-15	0.877	tsa: acyrthosiphon pisum strain lsr1 mrna sequence	protein	nucl	nucl
THRIPS_11_08_2011_00190	Weak	0	0			---NA---	0			---NA---	none
THRIPS_11_08_2011_00191	None	0	0			---NA---	0			---NA---	none
THRIPS_11_08_2011_00192	Strong	23	20	0	0.708	c1tc_drome ame: full=c-1-tetrahydrofolate cytoplasmic short=c1-thf synthase includes: ame: full=methylenetetrahydrofolate dehydrogenase includes: ame: full=methenyltetrahydrofolate cyclohydrolase includes: ame: full=formyltetrahydrofolate synthetase	20	0	0.815	drosophila melanogaster pugilist transcript variant mrna	protein	nucl	nucl
THRIPS_11_08_2011_00193	Strong	10	10	8.22759e-37	0.679	fcho2_human ame: full=fch domain only protein 2	20	1.03166e-80	0.8555	tsa: apis mellifera mrna sequence	protein	nucl	nucl
THRIPS_11_08_2011_00194	Good	23	20	6.32611e-100	0.945	arf1_drome ame: full=adp-ribosylation factor 1	20	7.44504e-119	0.991	tsa: apis mellifera mrna sequence	protein	nucl	nucl
THRIPS_11_08_2011_00195	Strong	6	7	1.77414e-35	0.555714	bap31_human ame: full=b-cell receptor-associated protein 31 short=bcr-associated protein 31 short=bap31 ame: full=6c6-ag tumor-associated antigen ame: full=protein cdm ame: full=p28	20	2.06629e-58	0.72	tsa: apis mellifera mrna sequence	protein	nucl	nucl
THRIPS_11_08_2011_00196	Strong	32	20	4.53908e-174	0.906	csk2a_spofr ame: full=casein kinase ii subunit alpha short=ck ii subunit alpha	20	0	0.975	tsa: apis mellifera mrna sequence	protein	nucl	nucl
THRIPS_11_08_2011_00197	Strong	26	20	0	0.556	ide_human ame: full=insulin-degrading enzyme ame: full=abeta-degrading protease ame: full=insulin protease short=insulinase ame: full=insulysin	20	0	0.671	tribolium castaneum metalloprotease mrna	protein	nucl	nucl
THRIPS_11_08_2011_00198	None	0	0			---NA---	0			---NA---	none
THRIPS_11_08_2011_00199	Strong	14	20	2.97699e-120	0.8855	rl8_mambr ame: full=60s ribosomal protein l8	20	7.09016e-149	0.9675	tsa: apis mellifera mrna sequence	protein	nucl	nucl
THRIPS_11_08_2011_00200	Strong	3	9	1.32753e-103	0.518889	pdxd1_xenla ame: full=pyridoxal-dependent decarboxylase domain-containing protein 1	20	0	0.8255	tsa: apis mellifera mrna sequence	protein	nucl	nucl
THRIPS_11_08_2011_00201	Strong	22	11	6.45308e-32	0.741818	tens1_human ame: full=tensin-1	20	2.54869e-55	0.871	tsa: apis mellifera mrna sequence	protein	nucl	nucl
THRIPS_11_08_2011_00202	Strong	11	8	0	0.55	usp9x_human ame: full=probable ubiquitin carboxyl-terminal hydrolase faf-x ame: full=deubiquitinating enzyme faf-x ame: full=fat facets in mammals short=hfam ame: full=fat facets x-linked ame: full=ubiquitin thiolesterase faf-x ame: full=ubiquitin-specific protease x chromosome ame: full=ubiquitin-specific-processing protease faf-x	20	0	0.809	apis mellifera probable ubiquitin carboxyl-terminal hydrolase faf-x (ubiquitin thioesterase faf-x) (ubiquitin-specific-processing protease faf-x) (deubiquitinating enzyme faf-x) (fat facets x-linked) (ubiquitin-specific protease x mrna	protein	nucl	nucl
THRIPS_11_08_2011_00203	Weak	0	0			---NA---	1	2.19542e-74	0.9	phakopsora pachyrhizi clone jgiafna- complete sequence	uncertain	nucl only	nucl only
THRIPS_11_08_2011_00204	Strong	24	20	4.31768e-51	0.519	megf8_rat ame: full=multiple epidermal growth factor-like domains protein 8 short=multiple egf-like domains protein 8 ame: full=epidermal growth factor-like protein 4 short=egf-like protein 4 flags: precursor	20	6.02444e-137	0.762	tribolium castaneum laminin subunit gamma-3 mrna	protein	nucl	nucl
THRIPS_11_08_2011_00205	Good	4	6	1.5474e-13	0.385	plec_human ame: full=plectin short=pcn short=pltn ame: full=hemidesmosomal protein 1 short=hd1 ame: full=plectin-1	20	0	0.6805	tribolium castaneum kakapo mrna	protein	nucl	nucl
THRIPS_11_08_2011_00206	Weak	0	4	2.03445e-27	0.575	bazooka cg5055-pa	3	9.75728e-29	0.816667	tsa: bemisia tabaci bt_q_zju_singletons165784 mrna sequence	protein	nucl	nucl
THRIPS_11_08_2011_00207	None	0	0			---NA---	0			---NA---	none
THRIPS_11_08_2011_00208	Strong	9	20	4.82857e-80	0.571	celf1_human ame: full=cugbp elav-like family member 1 short=celf-1 ame: full=50 kda nuclear polyadenylated rna-binding protein ame: full=bruno-like protein 2 ame: full=cug triplet repeat rna-binding protein 1 short=cug-bp1 ame: full=cug-bp- and etr-3-like factor 1 ame: full=deadenylation factor cug-bp ame: full=embryo deadenylation element-binding protein homolog short=eden-bp homolog ame: full=r…	20	5.9139e-116	0.89	tsa: apis mellifera mrna sequence	protein	nucl	nucl
THRIPS_11_08_2011_00209	Strong	10	20	4.21916e-36	0.502	cah15_mouse ame: full=carbonic anhydrase 15 ame: full=carbonate dehydratase xv ame: full=carbonic anhydrase xv short=ca-xv flags: precursor	20	8.07458e-101	0.62	acyrthosiphon pisum agap007550-pa mrna	protein	nucl	nucl
THRIPS_11_08_2011_00210	Strong	2	20	3.01774e-109	0.638	larp_drome ame: full=la-related protein ame: full=dlarp	20	0	0.8895	drosophila melanogaster la related protein transcript variant mrna	protein	nucl	nucl
THRIPS_11_08_2011_00211	Good	5	7	1.22311e-91	0.531429	rpn2_ponab ame: full=dolichyl-diphosphooligosaccharide--protein glycosyltransferase subunit 2 ame: full=dolichyl-diphosphooligosaccharide--protein glycosyltransferase 63 kda subunit ame: full=ribophorin ii short=rpn-ii ame: full=ribophorin-2 flags: precursor	20	2.88033e-154	0.675	tsa: apis mellifera mrna sequence	protein	nucl	nucl
THRIPS_11_08_2011_00212	Strong	4	20	2.34045e-47	0.442	pol4_drome ame: full=retrovirus-related pol polyprotein from transposon 412 includes: ame: full=protease includes: ame: full=reverse transcriptase includes: ame: full=endonuclease	20	9.64056e-39	0.4855	drosophila melanogaster chromosome complete sequence	uncertain	prot	nucl
THRIPS_11_08_2011_00213	Weak	0	0			---NA---	20	1.43404e-09	0.481	anaeromyxobacter dehalogenans 2cp- complete genome	bacterial	nucl only	nucl only
THRIPS_11_08_2011_00214	Weak	0	0			---NA---	0			---NA---	none
THRIPS_11_08_2011_00215	Weak	1	11	1.91231e-23	0.454545	rtbs_drome ame: full=probable rna-directed dna polymerase from transposon bs ame: full=reverse transcriptase	20	1.76117e-62	0.56	dna sequence from clone aehn- complete sequence	uncertain	nucl	nucl
THRIPS_11_08_2011_00216	Strong	28	20	5.16279e-71	0.6495	dpys_mouse ame: full=dihydropyrimidinase short=dhp short=dhpase ame: full=dihydropyrimidine amidohydrolase ame: full=hydantoinase	20	0	0.791	tsa: apis mellifera mrna sequence	protein	nucl	nucl
THRIPS_11_08_2011_00217	Weak	27	20	0	0.435	pgbm_mouse ame: full=basement membrane-specific heparan sulfate proteoglycan core protein short=hspg contains: ame: full=endorepellin contains: ame: full=lg3 peptide flags: precursor	20	0	0.679	tsa: apis mellifera mrna sequence	protein	nucl	nucl
THRIPS_11_08_2011_00219	Weak	2	1	4.01116e-07	0.46	ytx1_xenla ame: full=transposon tx1 uncharacterized 82 kda protein ame: full=orf 1	19	1.0062e-13	0.581053	tsa: bemisia tabaci bt_q_zju_singletons4294 mrna sequence	protein	nucl	nucl
THRIPS_11_08_2011_00220	Weak	0	0			---NA---	0			---NA---	none
THRIPS_11_08_2011_00221	Strong	3	16	4.12529e-27	0.760625	hypoxia-inducible factor 1 alpha	4	2.48529e-23	0.825	tsa: acyrthosiphon pisum strain lsr1 mrna sequence	protein	prot	nucl
THRIPS_11_08_2011_00222	Weak	0	0			---NA---	1	2.92863e-07	0.69	phakopsora pachyrhizi clone jgiafna- complete sequence	uncertain	nucl only	nucl only
THRIPS_11_08_2011_00223	Strong	5	20	3.43199e-11	0.4815	fril_xenla ame: full=ferritin light oocyte isoform ame: full=b-ferritin ame: full=gv-lch ame: full=	20	1.23742e-42	0.6495	tsa: acyrthosiphon pisum strain lsr1 mrna sequence	protein	nucl	nucl
THRIPS_11_08_2011_00224	Weak	0	0			---NA---	0			---NA---	none
THRIPS_11_08_2011_00225	Strong	7	20	3.29749e-79	0.789	arl5b_human ame: full=adp-ribosylation factor-like protein 5b ame: full=adp-ribosylation factor-like protein 8	20	2.16479e-106	0.9505	tsa: apis mellifera mrna sequence	protein	nucl	nucl
THRIPS_11_08_2011_00226	Weak	0	0			---NA---	0			---NA---	none
THRIPS_11_08_2011_00228	Good	5	20	4.10352e-27	0.8555	scy1-like protein 2	20	1.22977e-29	0.862	tribolium castaneum agap005207-pa mrna	protein	nucl	nucl
THRIPS_11_08_2011_00229	Strong	2	6	8.17298e-95	0.731667	wbs22_mouse ame: full=uncharacterized methyltransferase wbscr22 ame: full=williams-beuren syndrome chromosomal region 22 protein homolog	20	5.41951e-135	0.8415	tetraodon nigroviridis full-length cdna	cDNA	nucl	nucl
THRIPS_11_08_2011_00230	None	14	20	1.03839e-47	0.504	nrx4_drome ame: full=neurexin-4 ame: full=neurexin iv flags: precursor	20	7.95642e-60	0.9155	tsa: apis mellifera mrna sequence	protein	nucl	nucl
THRIPS_11_08_2011_00231	None	0	0			---NA---	0			---NA---	none
THRIPS_11_08_2011_00232	None	0	0			---NA---	0			---NA---	none
THRIPS_11_08_2011_00233	Strong	12	3	8.65736e-14	0.836667	zo1_canfa ame: full=tight junction protein zo-1 ame: full=tight junction protein 1 ame: full=zona occludens protein 1 ame: full=zonula occludens protein 1	20	7.14719e-15	0.832	canis familiaris tight junction protein 1 mrna	protein	nucl	prot
THRIPS_11_08_2011_00234	None	0	0			---NA---	0			---NA---	none
THRIPS_11_08_2011_00235	Weak	1	2	2.05281e-10	0.88	vacuolar protein sorting 13d	5	3.14617e-13	0.802	strongylocentrotus purpuratus kiaa0453 protein partial mrna	protein	nucl	prot
THRIPS_11_08_2011_00237	None	3	20	2.62248e-15	0.7625	retrotransposon-like family member (retr-1)-like	20	1.37316e-35	0.673	strongylocentrotus purpuratus hypothetical loc583562 mrna	protein	nucl	prot
THRIPS_11_08_2011_00238	None	0	0			---NA---	0			---NA---	none
THRIPS_11_08_2011_00239	None	0	0			---NA---	0			---NA---	none
THRIPS_11_08_2011_00240	Strong	4	20	2.37867e-39	0.5825	atg4d_mouse ame: full=cysteine protease atg4d ame: full=aut-like 4 cysteine endopeptidase ame: full=autophagin-4 ame: full=autophagy-related cysteine endopeptidase 4 ame: full=autophagy-related protein 4 homolog d	20	1.08427e-61	0.791	tsa: apis mellifera mrna sequence	protein	nucl	nucl
THRIPS_11_08_2011_00241	Weak	0	0			---NA---	0			---NA---	none
THRIPS_11_08_2011_00242	None	0	0			---NA---	0			---NA---	none
THRIPS_11_08_2011_00243	Weak	0	0			---NA---	0			---NA---	none
THRIPS_11_08_2011_00244	None	0	0			---NA---	0			---NA---	none
THRIPS_11_08_2011_00245	Weak	0	0			---NA---	0			---NA---	none
THRIPS_11_08_2011_00246	None	0	0			---NA---	0			---NA---	none
THRIPS_11_08_2011_00247	Strong	3	10	3.60246e-85	0.48	ddhd1_bovin ame: full=phospholipase ddhd1 ame: full=ddhd domain-containing protein 1 ame: full=phosphatidic acid-preferring phospholipase a1 short=pa-pla1	20	5.45022e-103	0.75	pediculus humanus corporis phospholipase mrna	protein	nucl	nucl
THRIPS_11_08_2011_00248	Weak	0	0			---NA---	0			---NA---	none
THRIPS_11_08_2011_00249	None	0	0			---NA---	0			---NA---	none
THRIPS_11_08_2011_00250	Weak	0	0			---NA---	0			---NA---	none
THRIPS_11_08_2011_00251	None	0	0			---NA---	0			---NA---	none
THRIPS_11_08_2011_00252	Good	11	3	6.79102e-11	0.69	utp20_mouse ame: full=small subunit processome component 20 homolog ame: full=down-regulated in metastasis protein	6	2.1149e-16	0.72	nasonia vitripennis cg4554-pa mrna	protein	nucl	nucl
THRIPS_11_08_2011_00253	Strong	12	14	1.90781e-79	0.577143	epc1_human ame: full=enhancer of polycomb homolog 1	20	8.06936e-151	0.8685	tsa: apis mellifera mrna sequence	protein	nucl	nucl
THRIPS_11_08_2011_00254	None	0	0			---NA---	0			---NA---	none
THRIPS_11_08_2011_00255	Good	2	0			---NA---	0			---NA---	none
THRIPS_11_08_2011_00256	None	0	10	3.51386e-11	0.518	bag family molecular chaperone regulator 3	15	3.34702e-11	0.579333	tsa: apis mellifera mrna sequence	protein	nucl	nucl
THRIPS_11_08_2011_00257	Strong	13	20	8.22076e-33	0.777	ef1a2_drome ame: full=elongation factor 1-alpha 2 short=ef-1-alpha-2	20	3.47238e-40	0.987	brachypanorpa carolinensis elongation factor 1-alpha (ef-1a) partial cds	protein	nucl	nucl
THRIPS_11_08_2011_00258	None	0	0			---NA---	0			---NA---	none
THRIPS_11_08_2011_00259	None	0	0			---NA---	0			---NA---	none
THRIPS_11_08_2011_00260	None	0	0			---NA---	0			---NA---	none
THRIPS_11_08_2011_00261	None	0	0			---NA---	0			---NA---	none
THRIPS_11_08_2011_00262	None	0	0			---NA---	0			---NA---	none
THRIPS_11_08_2011_00263	Good	3	4	1.23389e-12	0.62	atpf1_danre ame: full=atp synthase mitochondrial f1 complex assembly factor 1 flags: precursor	20	5.93955e-20	0.709	tsa: apis mellifera mrna sequence	protein	nucl	nucl
THRIPS_11_08_2011_00264	Strong	1	20	2.66155e-19	0.525	arrestin domain containing 4	20	2.39913e-17	0.768	drosophila melanogaster clone complete sequence	uncertain	prot	nucl
THRIPS_11_08_2011_00265	Weak	0	0			---NA---	0			---NA---	none
THRIPS_11_08_2011_00266	None	0	0			---NA---	0			---NA---	none
THRIPS_11_08_2011_00267	Weak	0	0			---NA---	0			---NA---	none
THRIPS_11_08_2011_00268	Good	5	4	9.69508e-18	0.7575	ext3_drome ame: full=exostosin-3 ame: full=protein brother of tout-velu	20	5.40039e-21	0.8215	aedes aegypti exostosin-2 partial mrna	protein	nucl	nucl
THRIPS_11_08_2011_00269	Weak	0	0			---NA---	0			---NA---	none
THRIPS_11_08_2011_00271	None	0	0			---NA---	0			---NA---	none
THRIPS_11_08_2011_00272	Weak	2	7	2.88963e-09	0.435714	sodium-coupled neutral amino acid transporter 10	0			---NA---	none	prot only	prot only
THRIPS_11_08_2011_00273	Weak	0	0			---NA---	0			---NA---	none
THRIPS_11_08_2011_00274	None	0	0			---NA---	0			---NA---	none
THRIPS_11_08_2011_00275	Good	0	2	1.72575e-06	0.585	cl066_xenla ame: full=upf0536 protein c12orf66 homolog	0			---NA---	none	prot only	prot only
THRIPS_11_08_2011_00276	None	0	0			---NA---	0			---NA---	none
THRIPS_11_08_2011_00277	None	0	0			---NA---	0			---NA---	none
THRIPS_11_08_2011_00278	Weak	0	0			---NA---	0			---NA---	none
THRIPS_11_08_2011_00279	Strong	52	20	3.45315e-31	0.786	zfh1_drome ame: full=zinc finger protein 1 ame: full=zinc finger homeodomain protein 1	20	5.48013e-39	0.962	acyrthosiphon pisum zinc-finger homeodomain protein 1 partial mrna	protein	nucl	nucl
THRIPS_11_08_2011_00280	Weak	0	0			---NA---	0			---NA---	none
THRIPS_11_08_2011_00281	None	0	0			---NA---	0			---NA---	none
THRIPS_11_08_2011_00282	None	0	0			---NA---	0			---NA---	none
THRIPS_11_08_2011_00283	Strong	1	3	2.69108e-17	0.6	pp4r1_mouse ame: full=serine threonine-protein phosphatase 4 regulatory subunit 1	20	7.56295e-21	0.6715	strongylocentrotus purpuratus protein serine threonine phosphatase 4 subunit pp4rmeg mrna	protein	nucl	nucl
THRIPS_11_08_2011_00284	Weak	0	0			---NA---	0			---NA---	none
THRIPS_11_08_2011_00285	Weak	0	0			---NA---	0			---NA---	none
THRIPS_11_08_2011_00286	None	0	0			---NA---	0			---NA---	none
THRIPS_11_08_2011_00287	Strong	11	12	1.18959e-23	0.785833	wrip1_human ame: full=atpase wrnip1 ame: full=werner helicase-interacting protein 1	20	8.15617e-28	0.8505	homo sapiens werner helicase interacting protein 1 transcript variant mrna	protein	nucl	nucl
THRIPS_11_08_2011_00288	Weak	0	0			---NA---	0			---NA---	none
THRIPS_11_08_2011_00289	None	3	2	1.23717e-07	0.655	e3 ubiquitin ligase	2	3.13266e-07	0.75	pediculus humanus corporis e3 ubiquitin ligase mrna	protein	prot	nucl
THRIPS_11_08_2011_00290	Weak	0	2	1.46142e-08	0.71	hypothetical protein ECU11_0580 [Encephalitozoon cuniculi GB-M1]	4	4.30276e-11	0.67	chromosome xi of strain gb-m1 of encephalitozoon cuniculi	uncertain	nucl	prot
THRIPS_11_08_2011_00291	None	0	0			---NA---	0			---NA---	none
THRIPS_11_08_2011_00292	Weak	4	2	9.12949e-16	0.8	fxl14_human ame: full=f-box lrr-repeat protein 14 ame: full=f-box and leucine-rich repeat protein 14	20	1.16866e-27	0.8625	pediculus humanus corporis mrna	protein	nucl	nucl
THRIPS_11_08_2011_00293	Good	6	2	5.71431e-10	0.66	prp17_human ame: full=pre-mrna-processing factor 17 ame: full=cell division cycle 40 homolog ame: full=eh-binding protein 3 short=ehb3 ame: full=prp17 homolog short=hprp17	20	1.15252e-22	0.7305	tsa: apis mellifera mrna sequence	protein	nucl	nucl
THRIPS_11_08_2011_00294	Strong	10	10	8.18975e-36	0.774	xpo2_pagma ame: full=exportin-2 short=exp2 ame: full=cellular apoptosis susceptibility protein ame: full=chromosome segregation 1-like protein ame: full=importin-alpha re-exporter	20	7.25264e-39	0.85	pagrus major mrna for cellular apoptosis susceptibility complete cds	protein	nucl	nucl
THRIPS_11_08_2011_00295	Weak	0	0			---NA---	0			---NA---	none
THRIPS_11_08_2011_00296	None	0	0			---NA---	0			---NA---	none
THRIPS_11_08_2011_00297	None	7	2	4.09805e-16	0.76	ubp34_mouse ame: full=ubiquitin carboxyl-terminal hydrolase 34 ame: full=deubiquitinating enzyme 34 ame: full=ubiquitin thiolesterase 34 ame: full=ubiquitin-specific-processing protease 34	20	8.83172e-25	0.764	drosophila melanogaster cg5794 transcript variant mrna	protein	nucl	nucl
THRIPS_11_08_2011_00298	None	0	0			---NA---	0			---NA---	none
THRIPS_11_08_2011_00299	None	0	0			---NA---	0			---NA---	none
THRIPS_11_08_2011_00300	Weak	0	0			---NA---	0			---NA---	none
THRIPS_11_08_2011_00301	Strong	24	20	3.39465e-23	0.654	al7a1_rat ame: full=alpha-aminoadipic semialdehyde dehydrogenase short=alpha-aasa dehydrogenase ame: full=aldehyde dehydrogenase family 7 member a1 ame: full=antiquitin-1 ame: full=betaine aldehyde dehydrogenase ame: full=delta1-piperideine-6-carboxylate dehydrogenase short=p6c dehydrogenase flags: precursor	20	1.04331e-32	0.8565	tsa: acyrthosiphon pisum strain lsr1 mrna sequence	protein	nucl	nucl
THRIPS_11_08_2011_00302	Weak	0	0			---NA---	0			---NA---	none
THRIPS_11_08_2011_00303	None	0	0			---NA---	0			---NA---	none
THRIPS_11_08_2011_00304	Good	2	20	2.19742e-17	0.5615	rnz_drome ame: full=ribonuclease mitochondrial short=rnase z ame: full=juvenile hormone-inducible protein 1 ame: full=drnase z ame: full=trna 3 endonuclease short= ame: full=trnase z flags: precursor	20	9.41365e-21	0.638	tsa: apis mellifera mrna sequence	protein	nucl	nucl
THRIPS_11_08_2011_00305	Weak	0	0			---NA---	0			---NA---	none
THRIPS_11_08_2011_00306	Weak	0	0			---NA---	0			---NA---	none
THRIPS_11_08_2011_00307	Good	0	2	8.89562e-06	0.69	hus1 checkpoint homolog ( pombe) isoform 2	17	1.10269e-07	0.71	monodelphis domestica hus1 checkpoint homolog ( pombe) transcript variant 2 mrna	protein	nucl	nucl
THRIPS_11_08_2011_00308	Weak	0	0			---NA---	0			---NA---	none
THRIPS_11_08_2011_00309	Weak	0	0			---NA---	0			---NA---	none
THRIPS_11_08_2011_00310	None	0	0			---NA---	0			---NA---	none
THRIPS_11_08_2011_00311	None	0	0			---NA---	0			---NA---	none
THRIPS_11_08_2011_00312	Weak	0	0			---NA---	0			---NA---	none
THRIPS_11_08_2011_00313	None	3	4	4.85257e-09	0.565	nagk_human ame: full=n-acetyl-d-glucosamine kinase short=n-acetylglucosamine kinase ame: full= c kinase	20	1.91952e-11	0.5875	strongylocentrotus purpuratus n-acetylglucosamine kinase mrna	protein	nucl	nucl
THRIPS_11_08_2011_00314	Strong	2	6	1.16436e-13	0.69	cobl-like 1	4	2.93319e-16	0.74	acyrthosiphon pisum cobl-like 1 mrna	protein	nucl	nucl
THRIPS_11_08_2011_00315	Strong	3	3	1.61308e-07	0.66	3-mercaptopyruvate sulfurtransferase-like	18	4.46651e-09	0.708889	bos taurus 3-mercaptopyruvate sulfurtransferase-like mrna	protein	nucl	nucl
THRIPS_11_08_2011_00316	Good	5	4	8.38015e-13	0.5375	efts_human ame: full=elongation factor mitochondrial short=ef-ts short=ef- t flags: precursor	20	2.73274e-29	0.699	tsa: apis mellifera mrna sequence	protein	nucl	nucl
THRIPS_11_08_2011_00317	Weak	0	0			---NA---	0			---NA---	none
THRIPS_11_08_2011_00318	Strong	10	20	3.91267e-34	0.425	cubn_canfa ame: full=cubilin flags: precursor	20	0	0.8055	drosophila melanogaster sp1070 transcript variant mrna	protein	nucl	nucl
THRIPS_11_08_2011_00319	Strong	8	20	0	0.66	ap3m1_human ame: full=ap-3 complex subunit mu-1 ame: full=ap-3 adapter complex mu3a subunit ame: full=adapter-related protein complex 3 mu-1 subunit ame: full=mu-adaptin 3a ame: full=mu3a-adaptin	20	0	0.9145	tsa: apis mellifera mrna sequence	protein	nucl	nucl
THRIPS_11_08_2011_00320	None	0	0			---NA---	0			---NA---	none
THRIPS_11_08_2011_00321	Weak	0	0			---NA---	0			---NA---	none
THRIPS_11_08_2011_00322	Strong	43	20	7.71057e-72	0.7175	ki16b_human ame: full=kinesin-like protein kif16b ame: full=sorting nexin-23	20	3.4564e-100	0.95	tsa: apis mellifera mrna sequence	protein	nucl	nucl
THRIPS_11_08_2011_00323	None	18	20	1.92983e-42	0.9705	tba_xenla ame: full=tubulin alpha chain	20	7.90948e-50	0.971	tsa: ictalurus furcatus mrna sequence	protein	nucl	nucl
THRIPS_11_08_2011_00324	None	0	0			---NA---	0			---NA---	none
THRIPS_11_08_2011_00325	None	1	7	9.87751e-13	0.677143	mediator of rna polymerase ii transcription subunit 16	10	1.63496e-13	0.649	tsa: apis mellifera mrna sequence	protein	nucl	prot
THRIPS_11_08_2011_00326	None	0	0			---NA---	0			---NA---	none
THRIPS_11_08_2011_00327	Weak	3	6	2.59657e-18	0.481667	-like protein subfamily c member 14	5	3.15287e-09	0.588	tsa: apis mellifera mrna sequence	protein	prot	nucl
THRIPS_11_08_2011_00328	Strong	2	5	3.33247e-23	0.61	tex10_chick ame: full=testis-expressed sequence 10 protein homolog	20	1.16589e-41	0.592	acyrthosiphon pisum testis-expressed sequence 10 protein mrna	protein	nucl	prot
THRIPS_11_08_2011_00329	Good	2	0			---NA---	0			---NA---	none
THRIPS_11_08_2011_00330	Strong	37	20	6.30298e-104	0.7175	psa6_mouse ame: full=proteasome subunit alpha type-6 ame: full=macropain iota chain ame: full=multicatalytic endopeptidase complex iota chain ame: full=proteasome iota chain	20	5.06631e-137	0.9175	tsa: apis mellifera mrna sequence	protein	nucl	nucl
THRIPS_11_08_2011_00331	None	0	0			---NA---	0			---NA---	none
THRIPS_11_08_2011_00332	None	0	0			---NA---	0			---NA---	none
THRIPS_11_08_2011_00333	Strong	47	20	1.08722e-91	0.5315	crb_drome ame: full=protein crumbs ame: full=95f flags: precursor	20	1.28368e-109	0.6945	tsa: apis mellifera mrna sequence	protein	nucl	nucl
THRIPS_11_08_2011_00334	None	0	0			---NA---	0			---NA---	none
THRIPS_11_08_2011_00335	None	0	0			---NA---	0			---NA---	none
THRIPS_11_08_2011_00336	None	0	0			---NA---	0			---NA---	none
THRIPS_11_08_2011_00337	None	0	0			---NA---	0			---NA---	none
THRIPS_11_08_2011_00338	None	0	0			---NA---	0			---NA---	none
THRIPS_11_08_2011_00339	None	0	0			---NA---	0			---NA---	none
THRIPS_11_08_2011_00340	Strong	35	16	3.84989e-22	0.7675	pld1_mouse ame: full=phospholipase d1 short=pld 1 short=mpld1 ame: full=choline phosphatase 1 ame: full=phosphatidylcholine-hydrolyzing phospholipase d1	20	1.20294e-30	0.902	drosophila melanogaster phospholipase d transcript variant mrna	protein	nucl	nucl
THRIPS_11_08_2011_00341	None	0	0			---NA---	0			---NA---	none
THRIPS_11_08_2011_00343	Weak	0	0			---NA---	0			---NA---	none
THRIPS_11_08_2011_00344	Weak	5	4	4.70272e-07	0.5675	transcriptional regulator atrx (x-linked helicase ii)	0			---NA---	none	prot only	prot only
THRIPS_11_08_2011_00345	Strong	6	3	7.83359e-28	0.873333	cdc73_rat ame: full=parafibromin ame: full=cell division cycle protein 73 homolog ame: full=hyperparathyroidism 2 protein homolog	20	4.13609e-42	0.931	tsa: apis mellifera mrna sequence	protein	nucl	nucl
THRIPS_11_08_2011_00346	Strong	26	8	2.69898e-12	0.5775	rbl1_human ame: full=retinoblastoma-like protein 1 ame: full=107 kda retinoblastoma-associated protein short=p107 ame: full=prb1	20	6.10073e-11	0.667	strongylocentrotus purpuratus p107 mrna	protein	prot	nucl
THRIPS_11_08_2011_00347	Strong	1	11	6.9681e-30	0.540909	lmbrl_mouse ame: full=protein lmbr1l ame: full=uteroglobin receptor	20	4.21762e-65	0.84	tsa: apis mellifera mrna sequence	protein	nucl	nucl
THRIPS_11_08_2011_00348	Strong	14	11	1.29657e-22	0.59	pb1_chick ame: full=protein polybromo-1	20	2.11958e-104	0.808	tsa: apis mellifera mrna sequence	protein	nucl	nucl
THRIPS_11_08_2011_00349	None	0	0			---NA---	0			---NA---	none
THRIPS_11_08_2011_00350	Good	5	13	1.93538e-32	0.660769	yif1b_human ame: full=protein yif1b ame: full=yip1-interacting factor homolog b	20	5.64814e-64	0.8025	tsa: apis mellifera mrna sequence	protein	nucl	nucl
THRIPS_11_08_2011_00351	Weak	2	6	7.0393e-11	0.658333	protein mical-	3	5.39021e-10	0.73	apis mellifera mical cg33208- isoform transcript variant 1 mrna	protein	prot	nucl
THRIPS_11_08_2011_00352	None	0	0			---NA---	0			---NA---	none
THRIPS_11_08_2011_00353	None	0	0			---NA---	0			---NA---	none
THRIPS_11_08_2011_00354	None	0	0			---NA---	0			---NA---	none
THRIPS_11_08_2011_00355	Strong	23	7	2.24117e-33	0.74	caz_drome ame: full=rna-binding protein cabeza ame: full=p19 ame: full=sarcoma-associated rna-binding fly homolog	20	3.96408e-41	0.834	tsa: apis mellifera mrna sequence	protein	nucl	nucl
THRIPS_11_08_2011_00356	Weak	0	0			---NA---	0			---NA---	none
THRIPS_11_08_2011_00357	Good	3	19	1.47524e-11	0.437368	peritrophin-like protein	2	5.78786e-07	0.5	Culex quinquefasciatus conserved hypothetical protein, mRNA	protein	prot	nucl
THRIPS_11_08_2011_00358	None	0	0			---NA---	0			---NA---	none
THRIPS_11_08_2011_00359	Weak	0	0			---NA---	0			---NA---	none
THRIPS_11_08_2011_00360	Weak	0	0			---NA---	0			---NA---	none
THRIPS_11_08_2011_00361	Weak	0	0			---NA---	0			---NA---	none
THRIPS_11_08_2011_00362	Weak	0	0			---NA---	0			---NA---	none
THRIPS_11_08_2011_00363	Weak	0	5	1.74354e-08	0.506	PREDICTED: similar to transposase [Strongylocentrotus purpuratus]	8	3.62083e-07	0.575	strongylocentrotus purpuratus transposase mrna	protein	prot	nucl
THRIPS_11_08_2011_00364	Strong	39	20	5.9657e-136	0.8055	taok1_mouse ame: full=serine threonine-protein kinase tao1 ame: full=thousand and one amino acid protein 1	20	0	0.9165	drosophila melanogaster tao-1 (tao-1) transcript variant mrna	protein	nucl	nucl
THRIPS_11_08_2011_00365	Good	0	0			---NA---	0			---NA---	none
THRIPS_11_08_2011_00366	Weak	0	0			---NA---	0			---NA---	none
THRIPS_11_08_2011_00367	Strong	1	3	4.64832e-11	0.556667	spag1_human ame: full=sperm-associated antigen 1 ame: full=hsd- ame: full=infertility-related sperm protein spag-1	20	7.01961e-12	0.664	bos taurus sperm associated antigen 1 mrna	protein	nucl	nucl
THRIPS_11_08_2011_00368	Strong	118	20	1.80758e-100	0.8895	rac1_rat ame: full=ras-related c3 botulinum toxin substrate 1 ame: full=p21-rac1 flags: precursor	20	4.36787e-120	0.952	tsa: apis mellifera mrna sequence	protein	nucl	nucl
THRIPS_11_08_2011_00369	None	17	11	5.45502e-20	0.856364	mnb_drome ame: full=serine threonine-protein kinase minibrain	20	5.21845e-30	0.943	tsa: apis mellifera mrna sequence	protein	nucl	nucl
THRIPS_11_08_2011_00370	None	4	2	6.34512e-07	0.425	mitogen-activated protein kinase kinase kinase 7-interacting protein 2	0			---NA---	none	prot only	prot only
THRIPS_11_08_2011_00371	None	3	2	1.488e-15	0.67	k1109_mouse ame: full=uncharacterized protein kiaa1109 ame: full=fragile site-associated protein homolog	20	1.63753e-88	0.769	drosophila melanogaster cg15134 transcript variant mrna	protein	nucl	nucl
THRIPS_11_08_2011_00372	Weak	0	0			---NA---	0			---NA---	none
THRIPS_11_08_2011_00373	None	0	0			---NA---	0			---NA---	none
THRIPS_11_08_2011_00374	Weak	0	0			---NA---	0			---NA---	none
THRIPS_11_08_2011_00375	Strong	27	20	2.31282e-68	0.7145	rheb_drome ame: full=gtp-binding protein rheb homolog flags: precursor	20	9.54215e-92	0.925	tsa: apis mellifera mrna sequence	protein	nucl	nucl
THRIPS_11_08_2011_00376	None	0	0			---NA---	0			---NA---	none
THRIPS_11_08_2011_00377	None	0	0			---NA---	0			---NA---	none
THRIPS_11_08_2011_00378	Weak	0	0			---NA---	0			---NA---	none
THRIPS_11_08_2011_00379	Good	3	4	2.11751e-08	0.5275	urfb1_human ame: full=uhrf1-binding protein 1 ame: full=icbp90-binding protein 1 ame: full=ubiquitin-like containing phd and ring finger domains 1-binding protein 1	20	5.96972e-52	0.7315	tsa: apis mellifera mrna sequence	protein	nucl	nucl
THRIPS_11_08_2011_00380	Weak	0	4	1.85169e-24	0.5875	clld6_human ame: full=chronic lymphocytic leukemia deletion region gene 6 protein short=cll deletion region gene 6 protein	20	8.92025e-42	0.769	tsa: apis mellifera mrna sequence	protein	nucl	nucl
THRIPS_11_08_2011_00381	None	13	6	2.75982e-13	0.583333	xbp1_human ame: full=x-box-binding protein 1 short=xbp-1 ame: full=tax-responsive element-binding protein 5	20	5.10773e-15	0.696	drosophila melanogaster gh09250 full length cdna	cDNA	nucl	nucl
THRIPS_11_08_2011_00382	None	0	0			---NA---	0			---NA---	none
THRIPS_11_08_2011_00383	Strong	6	12	1.30093e-53	0.578333	plpl2_mouse ame: full=patatin-like phospholipase domain-containing protein 2 ame: full=adipose triglyceride lipase ame: full=desnutrin	20	0	0.887	tsa: apis mellifera mrna sequence	protein	nucl	nucl
THRIPS_11_08_2011_00384	Strong	6	20	4.37417e-53	0.5395	gst1_blage ame: full=glutathione s-transferase ame: full=gst class-sigma ame: full=major allergen bla g 5 ame: allergen=bla g 5	20	2.10864e-61	0.6675	tsa: apis mellifera mrna sequence	protein	nucl	nucl
THRIPS_11_08_2011_00385	Strong	29	20	0	0.7275	pgm_drome ame: full=phosphoglucomutase short=pgm ame: full=glucose phosphomutase	20	0	0.8135	tsa: acyrthosiphon pisum strain lsr1 mrna sequence	protein	nucl	nucl
THRIPS_11_08_2011_00386	None	0	0			---NA---	0			---NA---	none
THRIPS_11_08_2011_00387	Strong	3	14	1.3696e-95	0.486429	erlec_mouse ame: full=endoplasmic reticulum lectin 1 ame: full=er lectin short=erlectin flags: precursor	20	1.90889e-156	0.7585	tsa: apis mellifera mrna sequence	protein	nucl	nucl
THRIPS_11_08_2011_00388	Strong	14	6	2.41513e-10	0.613333	sqstm_ponab ame: full=sequestosome-1 ame: full=ubiquitin-binding protein p62	20	2.59813e-27	0.6915	tsa: patiria miniata mrna sequence	protein	nucl	nucl
THRIPS_11_08_2011_00389	None	0	0			---NA---	0			---NA---	none
THRIPS_11_08_2011_00390	Weak	0	0			---NA---	0			---NA---	none
THRIPS_11_08_2011_00391	Good	0	0			---NA---	5	1.19716e-13	0.61	tsa: apis mellifera mrna sequence	protein	nucl only	nucl only
THRIPS_11_08_2011_00392	Strong	34	20	4.27551e-13	0.5785	erap1_human ame: full=endoplasmic reticulum aminopeptidase 1 ame: full=arts-1 ame: full=adipocyte-derived leucine aminopeptidase short=a-lap ame: full=aminopeptidase pils ame: full=puromycin-insensitive leucyl-specific aminopeptidase short=pils-ap ame: full=type 1 tumor necrosis factor receptor shedding aminopeptidase regulator	20	1.18467e-19	0.642	tsa: apis mellifera mrna sequence	protein	nucl	nucl
THRIPS_11_08_2011_00393	None	0	0			---NA---	0			---NA---	none
THRIPS_11_08_2011_00394	Weak	0	0			---NA---	0			---NA---	none
THRIPS_11_08_2011_00395	Weak	0	0			---NA---	0			---NA---	none
THRIPS_11_08_2011_00396	Strong	2	2	1.53491e-07	0.545	lola4_drome ame: full=longitudinals lacking isoforms f i k t	20	1.90093e-09	0.5465	tsa: apis mellifera mrna sequence	protein	nucl	nucl
THRIPS_11_08_2011_00397	None	0	0			---NA---	0			---NA---	none
THRIPS_11_08_2011_00398	None	2	4	6.88134e-24	0.725	ki21a_human ame: full=kinesin-like protein kif21a ame: full=kinesin-like protein kif2 ame: full=renal carcinoma antigen ny-ren-62	20	2.0222e-36	0.7955	tsa: apis mellifera mrna sequence	protein	nucl	nucl
THRIPS_11_08_2011_00399	Strong	27	5	1.71436e-06	0.582	e41l5_mouse ame: full=band -like protein 5	20	4.41361e-15	0.7965	drosophila melanogaster yurt transcript variant mrna	protein	nucl	nucl
THRIPS_11_08_2011_00400	Strong	3	8	6.66384e-24	0.675	zn622_human ame: full=zinc finger protein 622 ame: full=zinc finger-like protein 9	20	5.55487e-94	0.7795	tsa: apis mellifera mrna sequence	protein	nucl	nucl
THRIPS_11_08_2011_00401	Strong	11	20	3.85774e-88	0.834	tmede_droya ame: full=transmembrane emp24 domain-containing protein eca flags: precursor	20	1.16173e-107	0.89	aedes aegypti glycoprotein 25l partial mrna	protein	nucl	nucl
THRIPS_11_08_2011_00402	Strong	15	8	8.32557e-82	0.5425	glcm_mouse ame: full=glucosylceramidase ame: full=acid beta-glucosidase ame: full=beta-glucocerebrosidase ame: full=d-glucosyl-n-acylsphingosine glucohydrolase flags: precursor	20	1.29776e-118	0.6535	tsa: apis mellifera mrna sequence	protein	nucl	nucl
THRIPS_11_08_2011_00403	Weak	0	0			---NA---	0			---NA---	none
THRIPS_11_08_2011_00404	None	0	0			---NA---	0			---NA---	none
THRIPS_11_08_2011_00405	Good	12	20	1.16622e-25	0.4555	lipp_pig ame: full=pancreatic triacylglycerol lipase short=pl short=pancreatic lipase	20	1.42864e-43	0.5735	tsa: apis mellifera mrna sequence	protein	nucl	nucl
THRIPS_11_08_2011_00406	Weak	0	0			---NA---	0			---NA---	none
THRIPS_11_08_2011_00407	Strong	15	6	1.31015e-55	0.595	snx29_human ame: full=sorting nexin-29	20	4.34235e-87	0.8395	strongylocentrotus purpuratus hypothetical loc581449 mrna	protein	nucl	nucl
THRIPS_11_08_2011_00408	None	0	0			---NA---	0			---NA---	none
THRIPS_11_08_2011_00409	None	0	0			---NA---	0			---NA---	none
THRIPS_11_08_2011_00410	None	0	0			---NA---	0			---NA---	none
THRIPS_11_08_2011_00411	Good	9	20	4.07063e-135	0.8815	asna_culqu ame: full=atpase asna1 homolog ame: full=arsenical pump-driving atpase homolog ame: full=arsenite-stimulated atpase	20	1.43625e-161	0.8875	tsa: apis mellifera mrna sequence	protein	nucl	nucl
THRIPS_11_08_2011_00412	Weak	0	0			---NA---	0			---NA---	none
THRIPS_11_08_2011_00413	Weak	10	14	9.95147e-40	0.497143	dctn2_aedae ame: full=probable dynactin subunit 2	20	2.24204e-71	0.678	strongylocentrotus purpuratus mgc107818 protein mrna	protein	nucl	nucl
THRIPS_11_08_2011_00414	Weak	18	20	0	0.611	vpp1_xentr ame: full=v-type proton atpase 116 kda subunit a isoform 1 short=v-atpase 116 kda isoform a1 ame: full=vacuolar proton translocating atpase 116 kda subunit a isoform 1	20	0	0.8245	tsa: apis mellifera mrna sequence	protein	nucl	nucl
THRIPS_11_08_2011_00415	Good	5	20	0	0.697	tcpb_bovin ame: full=t-complex protein 1 subunit beta short=tcp-1-beta ame: full=cct-beta	20	0	0.9165	tsa: apis mellifera mrna sequence	protein	nucl	nucl
THRIPS_11_08_2011_00416	Strong	16	20	3.42886e-74	0.656	s22bb_danre ame: full=vesicle-trafficking protein sec22b-b ame: full=sec22 vesicle-trafficking protein homolog b-b	20	7.79119e-111	0.875	tsa: apis mellifera mrna sequence	protein	nucl	nucl
THRIPS_11_08_2011_00417	Weak	33	20	0	0.4815	pgbm_mouse ame: full=basement membrane-specific heparan sulfate proteoglycan core protein short=hspg contains: ame: full=endorepellin contains: ame: full=lg3 peptide flags: precursor	20	0	0.6715	tsa: apis mellifera mrna sequence	protein	nucl	nucl
THRIPS_11_08_2011_00418	Strong	11	14	5.03236e-95	0.651429	copd_mouse ame: full=coatomer subunit delta ame: full=archain ame: full=delta-coat protein short=delta-cop	20	2.6199e-125	0.7715	tsa: apis mellifera mrna sequence	protein	nucl	nucl
THRIPS_11_08_2011_00419	Strong	6	20	1.48054e-37	0.516	tre12_drose ame: full=facilitated trehalose transporter tret1-2 homolog	20	1.51022e-99	0.7555	tsa: apis mellifera mrna sequence	protein	nucl	nucl
THRIPS_11_08_2011_00420	Strong	22	20	1.54583e-157	0.8475	prps1_rat ame: full=ribose-phosphate pyrophosphokinase 1 ame: full=phosphoribosyl pyrophosphate synthase i short=prs-i	20	0	0.97	tsa: apis mellifera mrna sequence	protein	nucl	nucl
THRIPS_11_08_2011_00421	Good	11	7	1.42842e-109	0.627143	stim_drome ame: full=stromal interaction molecule homolog flags: precursor	20	3.0059e-151	0.844	tsa: apis mellifera mrna sequence	protein	nucl	nucl
THRIPS_11_08_2011_00422	Weak	0	0			---NA---	3	1.8742e-06	0.646667	drosophila willistoni gk25327 (dwil\gk25327) mrna	protein	nucl only	nucl only
THRIPS_11_08_2011_00423	Strong	6	20	4.27927e-108	0.5545	s35b2_drome ame: full=adenosine 3 -phospho 5 -phosphosulfate transporter 1 ame: full=paps transporter 1 ame: full=protein slalom	20	3.07899e-132	0.739	nasonia vitripennis udp-galactose transporter mrna	protein	nucl	nucl
THRIPS_11_08_2011_00424	Good	7	20	2.84286e-26	0.4535	lipp_pig ame: full=pancreatic triacylglycerol lipase short=pl short=pancreatic lipase	20	1.33178e-43	0.581	tsa: apis mellifera mrna sequence	protein	nucl	nucl
THRIPS_11_08_2011_00425	Weak	0	0			---NA---	0			---NA---	none
THRIPS_11_08_2011_00426	None	25	20	3.1378e-78	0.8255	rab10_disom ame: full=ras-related protein rab-10 short=ora1	20	9.33092e-111	0.907	tsa: apis mellifera mrna sequence	protein	nucl	nucl
THRIPS_11_08_2011_00427	None	10	20	3.31611e-113	0.5415	txtp_caeel ame: full= tricarboxylate transport mitochondrial ame: full=citrate transport protein short=ctp flags: precursor	20	1.60451e-152	0.854	drosophila melanogaster cg6782 transcript variant mrna	protein	nucl	nucl
THRIPS_11_08_2011_00428	Strong	73	20	9.25395e-145	0.7265	ks6b1_rat ame: full=ribosomal protein s6 kinase beta-1 short=s6k-beta-1 short=s6k1 ame: full=70 kda ribosomal protein s6 kinase 1 short=p70s6k1 short=p70-s6k 1 ame: full=ribosomal protein s6 kinase i ame: full=p70 ribosomal s6 kinase alpha short=p70 s6 kinase alpha short=p70 s6k-alpha short=p70 s6ka	20	0	0.891	tsa: apis mellifera mrna sequence	protein	nucl	nucl
THRIPS_11_08_2011_00429	Strong	30	20	0	0.398	megf8_mouse ame: full=multiple epidermal growth factor-like domains protein 8 short=multiple egf-like domains protein 8 ame: full=epidermal growth factor-like protein 4 short=egf-like protein 4 flags: precursor	20	0	0.7445	acyrthosiphon pisum cg7466 cg7466-pa mrna	protein	nucl	nucl
THRIPS_11_08_2011_00430	Weak	0	0			---NA---	0			---NA---	none
THRIPS_11_08_2011_00431	Strong	41	20	0	0.8515	atc1_drome ame: full=calcium-transporting atpase sarcoplasmic endoplasmic reticulum type ame: full=calcium pump	20	0	0.945	drosophila melanogaster calcium atpase at 60a (ca-p60a) transcript variant mrna	protein	nucl	nucl
THRIPS_11_08_2011_00432	Strong	26	10	0	0.851	clh_drome ame: full=clathrin heavy chain	20	0	0.944	pediculus humanus corporis clathrin heavy mrna	protein	nucl	nucl
THRIPS_11_08_2011_00433	Strong	18	20	0	0.64	abcf1_pig ame: full=atp-binding cassette sub-family f member 1	20	0	0.9215	tsa: bemisia tabaci bt_q_zju_singletons25825 mrna sequence	protein	nucl	nucl
THRIPS_11_08_2011_00434	Strong	23	14	3.78054e-91	0.548571	pal1_drome ame: full=peptidyl-alpha-hydroxyglycine alpha-amidating lyase 1 ame: full=peptidylamidoglycolate lyase 1 ame: full=dpal1 flags: precursor	20	1.33088e-100	0.707	drosophila melanogaster cg12130 transcript variant mrna	protein	nucl	nucl
THRIPS_11_08_2011_00435	Strong	56	20	0	0.5385	lrp2_human ame: full=low-density lipoprotein receptor-related protein 2 short=lrp-2 ame: full=glycoprotein 330 short=gp330 ame: full=megalin flags: precursor	20	0	0.915	pediculus humanus corporis low-density lipoprotein mrna	protein	nucl	nucl
THRIPS_11_08_2011_00436	None	0	0			---NA---	0			---NA---	none
THRIPS_11_08_2011_00437	Strong	6	16	2.47353e-40	0.4625	sap_human ame: full=proactivator polypeptide contains: ame: full=saposin-a ame: full=protein a contains: ame: full=saposin-b-val contains: ame: full=saposin-b ame: full=cerebroside sulfate activator short=csact ame: full=dispersin ame: full=sphingolipid activator protein 1 short=sap-1 ame: full=sulfatide gm1 activator contains: ame: full=saposin-c ame: full=a1 activator ame: full=co-beta-glucosid…	20	0	0.814	tsa: apis mellifera mrna sequence	protein	nucl	nucl
THRIPS_11_08_2011_00438	Strong	10	20	1.61638e-68	0.615	sumf1_bovin ame: full=sulfatase-modifying factor 1 ame: full=c-alpha-formylglycine-generating enzyme 1 flags: precursor	20	6.60819e-110	0.7655	tsa: apis mellifera mrna sequence	protein	nucl	nucl
THRIPS_11_08_2011_00439	Weak	0	0			---NA---	0			---NA---	none
THRIPS_11_08_2011_00440	Strong	2	20	1.8719e-31	0.516	tryb_droer ame: full=trypsin beta flags: precursor	20	4.54224e-30	0.534	tsa: apis mellifera mrna sequence	protein	prot	nucl
THRIPS_11_08_2011_00441	Weak	0	0			---NA---	0			---NA---	none
THRIPS_11_08_2011_00442	None	8	3	1.3823e-07	0.393333	unc89_caeel ame: full=muscle m-line assembly protein unc-89 ame: full=uncoordinated protein 89	0			---NA---	none	prot only	prot only
THRIPS_11_08_2011_00443	Strong	7	20	1.44691e-59	0.6	coac_mouse ame: full=phosphopantothenoylcysteine decarboxylase short=ppc-dc ame: full=	20	1.69759e-97	0.867	tsa: apis mellifera mrna sequence	protein	nucl	nucl
THRIPS_11_08_2011_00444	None	0	0			---NA---	0			---NA---	none
THRIPS_11_08_2011_00445	Strong	5	20	8.61952e-16	0.482	cox42_thuob ame: full=cytochrome c oxidase subunit 4 isoform mitochondrial ame: full=cytochrome c oxidase subunit iv isoform 2 short=cox iv-2 flags: precursor	20	1.21436e-87	0.674	aedes aegypti cytochrome c oxidase subunit iv partial mrna	protein	nucl	nucl
THRIPS_11_08_2011_00446	Strong	8	20	1.59739e-60	0.5235	lip1_drome ame: full=lipase 1 short= ip1 flags: precursor	20	1.4489e-79	0.5965	aedes aegypti lipase 1 precursor partial mrna	protein	nucl	nucl
THRIPS_11_08_2011_00447	Strong	3	20	1.36338e-178	0.726	amya_droma ame: full=alpha-amylase a ame: full= -alpha-d-glucan glucanohydrolase flags: precursor	20	0	0.776	tsa: sarcophaga crassipalpis mrna sequence	protein	nucl	nucl
THRIPS_11_08_2011_00448	None	0	0			---NA---	1	1.23465e-10	0.94	callithrix jacchus phosphatase and actin regulator 4-like mrna	protein	nucl only	nucl only
THRIPS_11_08_2011_00449	Good	5	7	2.89203e-50	0.618571	rpn2_ponab ame: full=dolichyl-diphosphooligosaccharide--protein glycosyltransferase subunit 2 ame: full=dolichyl-diphosphooligosaccharide--protein glycosyltransferase 63 kda subunit ame: full=ribophorin ii short=rpn-ii ame: full=ribophorin-2 flags: precursor	20	2.87273e-63	0.6415	aedes aegypti ribophorin ii partial mrna	protein	nucl	nucl
THRIPS_11_08_2011_00450	Strong	45	20	8.74476e-90	0.803	rab5c_canfa ame: full=ras-related protein rab-5c	20	1.45695e-121	0.883	tsa: apis mellifera mrna sequence	protein	nucl	nucl
THRIPS_11_08_2011_00451	None	0	0			---NA---	0			---NA---	none
THRIPS_11_08_2011_00452	None	29	20	3.02849e-154	0.886	kc1a_human ame: full=casein kinase i isoform alpha short=cki-alpha ame: full=ck1	20	0	0.9585	tsa: apis mellifera mrna sequence	protein	nucl	nucl
THRIPS_11_08_2011_00453	Weak	18	20	5.82487e-21	0.7235	f261_rat ame: full=6-phosphofructo-2-kinase fructose- -biphosphatase 1 short=6pf-2-k fru- -p2ase 1 short=pfk fbpase 1 ame: full=6pf-2-k fru- -p2ase liver isozyme includes: ame: full=6-phosphofructo-2-kinase includes: ame: full=fructose- -bisphosphatase	20	2.87105e-35	0.8185	tsa: apis mellifera mrna sequence	protein	nucl	nucl
THRIPS_11_08_2011_00454	Weak	0	0			---NA---	0			---NA---	none
THRIPS_11_08_2011_00455	Strong	3	20	8.62818e-103	0.5295	acsf2_danre ame: full=acyl- synthetase family member mitochondrial flags: precursor	20	3.03922e-151	0.6675	aedes aegypti amp dependent coa ligase partial mrna	protein	nucl	nucl
THRIPS_11_08_2011_00456	Strong	9	20	2.18805e-24	0.5365	anr39_mouse ame: full=ankyrin repeat domain-containing protein 39	20	9.86287e-113	0.858	drosophila melanogaster cg31919 transcript variant mrna	protein	nucl	nucl
THRIPS_11_08_2011_00457	Good	27	11	1.93874e-179	0.727273	gsh1_mouse ame: full=glutamate--cysteine ligase catalytic subunit ame: full=gcs heavy chain ame: full=gamma-ecs ame: full=gamma-glutamylcysteine synthetase	20	0	0.886	tsa: apis mellifera mrna sequence	protein	nucl	nucl
THRIPS_11_08_2011_00458	Strong	43	20	7.70502e-178	0.9295	pp11_drome ame: full=serine threonine-protein phosphatase alpha-1 isoform	20	0	0.9495	tsa: apis mellifera mrna sequence	protein	nucl	nucl
THRIPS_11_08_2011_00459	Strong	8	10	2.34722e-15	0.522	rbm10_human ame: full=rna-binding protein 10 ame: full=g patch domain-containing protein 9 ame: full=rna-binding motif protein 10 ame: full=rna-binding protein s1-1 short=s1-1	20	5.44761e-30	0.605	tsa: apis mellifera mrna sequence	protein	nucl	nucl
THRIPS_11_08_2011_00460	Weak	4	1	8.28066e-10	0.46	hypothetical protein TcasGA2_TC002138 [Tribolium castaneum]	0			---NA---	none	prot only	prot only
THRIPS_11_08_2011_00461	Weak	2	2	1.65179e-09	0.62	ct108_mouse ame: full=transmembrane protein c20orf108 homolog	20	1.57148e-44	0.768	tsa: apis mellifera mrna sequence	protein	nucl	nucl
THRIPS_11_08_2011_00462	Weak	0	0			---NA---	0			---NA---	none
THRIPS_11_08_2011_00463	Weak	0	0			---NA---	0			---NA---	none
THRIPS_11_08_2011_00464	Good	13	16	8.47753e-75	0.635625	spcs3_drome ame: full=signal peptidase complex subunit 3 ame: full=microsomal signal peptidase 22 kda subunit short=spc22 short=spase 22 kda subunit	20	1.76201e-94	0.868	tsa: apis mellifera mrna sequence	protein	nucl	nucl
THRIPS_11_08_2011_00465	Weak	0	0			---NA---	0			---NA---	none
THRIPS_11_08_2011_00466	Good	4	9	2.59079e-13	0.672222	nucleoside 2-deoxyribosyltransferase	6	2.90552e-16	0.621667	stigmatella aurantiaca dw4 3- complete genome	uncertain	nucl	prot
THRIPS_11_08_2011_00467	None	0	0			---NA---	0			---NA---	none
THRIPS_11_08_2011_00468	Weak	0	0			---NA---	0			---NA---	none
THRIPS_11_08_2011_00469	None	0	0			---NA---	0			---NA---	none
THRIPS_11_08_2011_00470	Weak	0	0			---NA---	0			---NA---	none
THRIPS_11_08_2011_00471	None	0	0			---NA---	0			---NA---	none
THRIPS_11_08_2011_00472	Strong	6	14	1.31998e-14	0.56	alg10_schpo ame: full=alpha- glucosyltransferase alg10 ame: full=alpha-2-glucosyltransferase alg10 ame: full=asparagine-linked glycosylation protein 10 ame: full=dolichyl-phosphoglucose-dependent glucosyltransferase alg10	20	6.36477e-15	0.6055	nasonia vitripennis kcr1 mrna	protein	nucl	nucl
THRIPS_11_08_2011_00473	Good	11	4	4.45911e-07	0.82	nudc_mouse ame: full=nuclear migration protein nudc ame: full=nuclear distribution protein c homolog ame: full=silica-induced gene 92 protein short=sig-92	20	4.0214e-11	0.8495	tsa: apis mellifera mrna sequence	protein	nucl	nucl
THRIPS_11_08_2011_00474	None	3	13	2.01383e-13	0.691538	sodium hydrogen exchanger 3	9	4.39558e-19	0.795556	tsa: apis mellifera mrna sequence	protein	nucl	nucl
THRIPS_11_08_2011_00475	Strong	60	20	3.74869e-30	0.839	bmp5_human ame: full=bone morphogenetic protein 5 short=bmp-5 flags: precursor	20	8.20347e-40	0.8915	bos taurus bone morphogenetic protein 5 mrna	protein	nucl	nucl
THRIPS_11_08_2011_00476	None	0	0			---NA---	0			---NA---	none
THRIPS_11_08_2011_00477	None	0	0			---NA---	0			---NA---	none
THRIPS_11_08_2011_00478	None	0	0			---NA---	0			---NA---	none
THRIPS_11_08_2011_00479	None	0	0			---NA---	0			---NA---	none
THRIPS_11_08_2011_00480	Weak	0	0			---NA---	0			---NA---	none
THRIPS_11_08_2011_00481	Strong	11	9	2.55134e-18	0.664444	pomt2_human ame: full=protein o-mannosyl-transferase 2 ame: full=dolichyl-phosphate-mannose--protein mannosyltransferase 2	20	5.84634e-22	0.785	tribolium castaneum mannosyltransferase mrna	protein	nucl	nucl
THRIPS_11_08_2011_00482	None	0	0			---NA---	0			---NA---	none
THRIPS_11_08_2011_00483	Good	2	3	2.24027e-06	0.563333	zbed5_human ame: full=zinc finger bed domain-containing protein 5 ame: full=transposon-derived buster1 transposase-like protein	0			---NA---	none	prot only	prot only
THRIPS_11_08_2011_00484	None	7	20	3.50896e-23	0.7365	zn233_human ame: full=zinc finger protein 233	20	9.11074e-48	0.9545	tsa: apis mellifera mrna sequence	protein	nucl	nucl
THRIPS_11_08_2011_00485	None	0	0			---NA---	0			---NA---	none
THRIPS_11_08_2011_00486	Strong	11	4	1.52561e-18	0.7425	ctdp1_human ame: full=rna polymerase ii subunit a c-terminal domain phosphatase ame: full=tfiif-associating ctd phosphatase	20	7.77928e-34	0.865	pediculus humanus corporis rna polymerase ii ctd mrna	protein	nucl	nucl
THRIPS_11_08_2011_00487	None	0	0			---NA---	0			---NA---	none
THRIPS_11_08_2011_00488	Weak	0	0			---NA---	0			---NA---	none
THRIPS_11_08_2011_00489	Strong	10	6	6.36854e-119	0.841667	kdm6a_human ame: full=lysine-specific demethylase 6a ame: full=histone demethylase utx ame: full=ubiquitously-transcribed tpr protein on the x chromosome ame: full=ubiquitously-transcribed x chromosome tetratricopeptide repeat protein	20	5.57074e-159	0.922	tsa: apis mellifera mrna sequence	protein	nucl	nucl
THRIPS_11_08_2011_00490	Weak	0	0			---NA---	0			---NA---	none
THRIPS_11_08_2011_00491	Weak	0	0			---NA---	0			---NA---	none
THRIPS_11_08_2011_00492	Weak	0	0			---NA---	0			---NA---	none
THRIPS_11_08_2011_00493	Weak	0	0			---NA---	0			---NA---	none
THRIPS_11_08_2011_00494	None	0	0			---NA---	0			---NA---	none
THRIPS_11_08_2011_00495	Weak	0	0			---NA---	0			---NA---	none
THRIPS_11_08_2011_00496	None	0	0			---NA---	0			---NA---	none
THRIPS_11_08_2011_00497	None	0	0			---NA---	0			---NA---	none
THRIPS_11_08_2011_00498	Good	5	4	1.71532e-06	0.66	nrbf2_human ame: full=nuclear receptor-binding factor 2 short=nrbf-2 ame: full=comodulator of ppar and rxr	20	1.7779e-11	0.685	homo sapiens chromosome 3 clone rp11- complete sequence	uncertain	nucl	nucl
THRIPS_11_08_2011_00499	Weak	82	20	7.38891e-34	0.945	mef2_drome ame: full=myocyte-specific enhancer factor 2 ame: full=mads domain transcription factor d-mef2	20	9.4044e-40	1	tsa: apis mellifera mrna sequence	protein	nucl	nucl
THRIPS_11_08_2011_00500	None	0	0			---NA---	0			---NA---	none
THRIPS_11_08_2011_00501	None	2	3	6.39991e-09	0.616667	rrp12_chick ame: full=rrp12-like protein	8	1.57891e-16	0.6375	tsa: apis mellifera mrna sequence	protein	nucl	nucl
THRIPS_11_08_2011_00502	Good	0	0			---NA---	0			---NA---	none
THRIPS_11_08_2011_00503	Weak	0	0			---NA---	0			---NA---	none
THRIPS_11_08_2011_00504	Good	8	20	1.35107e-14	0.9245	kinase suppressor of ras	20	4.53418e-18	0.936	tsa: apis mellifera mrna sequence	protein	nucl	nucl
THRIPS_11_08_2011_00505	Weak	0	0			---NA---	0			---NA---	none
THRIPS_11_08_2011_00506	Strong	4	3	1.10252e-13	0.636667	abtb1_human ame: full=ankyrin repeat and btb poz domain-containing protein 1 ame: full=elongation factor 1a-binding protein	20	8.55791e-18	0.662	homo sapiens ankyrin repeat and btb domain containing 1 transcript variant non-coding rna	miscrna	nucl	nucl
THRIPS_11_08_2011_00507	Weak	1	1	3.01686e-06	0.6	Titin [Harpegnathos saltator]	0			---NA---	none	prot only	prot only
THRIPS_11_08_2011_00508	Weak	0	0			---NA---	0			---NA---	none
THRIPS_11_08_2011_00509	None	0	1	2.01392e-07	0.6	rrp1l_drome ame: full=ribosomal rna processing protein 1 homolog ame: full=nnp-1 homolog ame: full=rrp1-like protein	20	3.04935e-13	0.607	tsa: apis mellifera mrna sequence	protein	nucl	nucl
THRIPS_11_08_2011_00510	None	0	0			---NA---	0			---NA---	none
THRIPS_11_08_2011_00511	None	0	0			---NA---	1	3.86032e-07	0.92	tsa: bemisia tabaci bt_q_zju_singletons162642 mrna sequence	protein	nucl only	nucl only
THRIPS_11_08_2011_00512	Good	0	9	5.38655e-11	0.546667	cap cg18408- isoform c	20	5.7178e-09	0.646	tsa: apis mellifera mrna sequence	protein	prot	nucl
THRIPS_11_08_2011_00513	Weak	0	0			---NA---	0			---NA---	none
THRIPS_11_08_2011_00514	None	0	0			---NA---	0			---NA---	none
THRIPS_11_08_2011_00515	Weak	38	18	1.80302e-14	0.629444	rna-binding protein nova-1	20	1.2649e-16	0.804	tsa: apis mellifera mrna sequence	protein	nucl	nucl
THRIPS_11_08_2011_00516	Weak	0	0			---NA---	0			---NA---	none
THRIPS_11_08_2011_00517	Strong	13	11	9.82766e-18	0.705455	yn53_schpo ame: full= d-lactate dehydrogenase mitochondrial flags: precursor	20	5.75184e-26	0.768	tsa: apis mellifera mrna sequence	protein	nucl	nucl
THRIPS_11_08_2011_00518	None	0	0			---NA---	0			---NA---	none
THRIPS_11_08_2011_00519	None	0	0			---NA---	0			---NA---	none
THRIPS_11_08_2011_00520	None	0	0			---NA---	0			---NA---	none
THRIPS_11_08_2011_00521	Strong	23	20	5.34051e-16	0.638	yng2_canga ame: full=chromatin modification-related protein yng2 ame: full=ing1 homolog 2	20	3.88096e-29	0.924	tsa: apis mellifera mrna sequence	protein	nucl	nucl
THRIPS_11_08_2011_00522	Weak	0	0			---NA---	0			---NA---	none
THRIPS_11_08_2011_00523	None	2	2	2.35762e-11	0.94	cq028_human ame: full=upf0663 transmembrane protein c17orf28 ame: full=down-regulated in multiple cancers 1	20	6.38742e-14	0.924	tsa: bemisia tabaci bt_q_zju_singletons167499 mrna sequence	protein	nucl	prot
THRIPS_11_08_2011_00524	Weak	0	0			---NA---	0			---NA---	none
THRIPS_11_08_2011_00525	Strong	34	20	7.74017e-39	0.539	shark_drome ame: full=tyrosine-protein kinase shark	20	9.05292e-94	0.62	strongylocentrotus purpuratus protein-tyrosine kinase mrna	protein	nucl	nucl
THRIPS_11_08_2011_00526	Weak	0	0			---NA---	0			---NA---	none
THRIPS_11_08_2011_00527	Weak	0	0			---NA---	0			---NA---	none
THRIPS_11_08_2011_00528	Weak	3	2	5.65477e-27	0.65	k0513_mouse ame: full=uncharacterized protein kiaa0513	20	1.35117e-74	0.78	tsa: apis mellifera mrna sequence	protein	nucl	nucl
THRIPS_11_08_2011_00529	None	0	0			---NA---	0			---NA---	none
THRIPS_11_08_2011_00530	Weak	0	0			---NA---	0			---NA---	none
THRIPS_11_08_2011_00531	Weak	0	0			---NA---	0			---NA---	none
THRIPS_11_08_2011_00532	None	0	0			---NA---	0			---NA---	none
THRIPS_11_08_2011_00533	Weak	0	0			---NA---	0			---NA---	none
THRIPS_11_08_2011_00534	Weak	0	0			---NA---	0			---NA---	none
THRIPS_11_08_2011_00535	None	0	0			---NA---	0			---NA---	none
THRIPS_11_08_2011_00536	Good	39	16	9.53069e-18	0.52875	tri33_mouse ame: full=e3 ubiquitin-protein ligase trim33 ame: full=ectodermin homolog ame: full=transcription intermediary factor 1-gamma short=tif1-gamma ame: full=tripartite motif-containing protein 33	20	5.22126e-55	0.8425	drosophila melanogaster bonus transcript variant mrna	protein	nucl	nucl
THRIPS_11_08_2011_00537	None	0	0			---NA---	0			---NA---	none
THRIPS_11_08_2011_00538	Weak	0	0			---NA---	0			---NA---	none
THRIPS_11_08_2011_00539	Strong	30	20	3.45892e-84	0.611	dopr1_drome ame: full=dopamine receptor 1 short=d-dop1 short= op1 short=dda1 flags: precursor	20	8.80334e-100	0.9045	tsa: apis mellifera mrna sequence	protein	nucl	nucl
THRIPS_11_08_2011_00540	None	0	0			---NA---	0			---NA---	none
THRIPS_11_08_2011_00541	Strong	1	3	4.53309e-07	0.57	cox16_mouse ame: full=cytochrome c oxidase assembly protein cox16 mitochondrial flags: precursor	2	1.59877e-10	0.64	saccoglossus kowalevskii cox16 cytochrome c oxidase assembly homolog mrna	protein	nucl	nucl
THRIPS_11_08_2011_00542	Weak	0	0			---NA---	0			---NA---	none
THRIPS_11_08_2011_00543	Good	0	2	4.70725e-07	0.835	agap001751- partial	0			---NA---	none	prot only	prot only
THRIPS_11_08_2011_00544	Good	113	20	3.4468e-31	0.956	mad_drome ame: full=protein mothers against dpp	20	1.28048e-37	0.9725	tsa: apis mellifera mrna sequence	protein	nucl	nucl
THRIPS_11_08_2011_00545	None	0	0			---NA---	0			---NA---	none
THRIPS_11_08_2011_00546	Weak	0	0			---NA---	0			---NA---	none
THRIPS_11_08_2011_00547	None	15	6	8.58271e-14	0.666667	vp33a_rat ame: full=vacuolar protein sorting-associated protein 33a short=r-vps33a	20	4.19146e-21	0.719	tsa: apis mellifera mrna sequence	protein	nucl	nucl
THRIPS_11_08_2011_00548	Weak	0	0			---NA---	0			---NA---	none
THRIPS_11_08_2011_00549	Weak	0	0			---NA---	0			---NA---	none
THRIPS_11_08_2011_00550	None	0	0			---NA---	0			---NA---	none
THRIPS_11_08_2011_00551	Weak	0	0			---NA---	0			---NA---	none
THRIPS_11_08_2011_00552	None	0	0			---NA---	0			---NA---	none
THRIPS_11_08_2011_00553	Strong	10	20	0	0.379	titin_drome ame: full=titin ame: full=d-titin ame: full=kettin	20	0	0.8475	drosophila melanogaster sallimus transcript variant mrna	protein	nucl	nucl
THRIPS_11_08_2011_00554	None	0	0			---NA---	0			---NA---	none
THRIPS_11_08_2011_00555	None	0	0			---NA---	0			---NA---	none
THRIPS_11_08_2011_00556	Strong	78	20	0	0.856	hdac1_drome ame: full=histone deacetylase rpd3 short=hd short=drpd3	20	0	0.9685	aedes aegypti histone deacetylase partial mrna	protein	nucl	nucl
THRIPS_11_08_2011_00557	Weak	0	0			---NA---	1	2.19637e-111	0.88	phakopsora pachyrhizi clone jgiafna- complete sequence	uncertain	nucl only	nucl only
THRIPS_11_08_2011_00558	None	2	20	6.96949e-11	0.665	vitellogenin-a1	17	5.45386e-13	0.681765	actias selene vitellogenin complete cds	protein	nucl	nucl
THRIPS_11_08_2011_00559	Weak	0	0			---NA---	0			---NA---	none
THRIPS_11_08_2011_00560	None	0	0			---NA---	0			---NA---	none
THRIPS_11_08_2011_00561	None	0	0			---NA---	0			---NA---	none
THRIPS_11_08_2011_00562	Weak	0	0			---NA---	0			---NA---	none
THRIPS_11_08_2011_00563	None	0	0			---NA---	0			---NA---	none
THRIPS_11_08_2011_00564	Weak	0	0			---NA---	0			---NA---	none
THRIPS_11_08_2011_00565	None	0	0			---NA---	0			---NA---	none
THRIPS_11_08_2011_00566	Good	3	2	1.67321e-37	0.58	mana_strli ame: full=mannan endo- -beta-mannosidase ame: full= -beta-d-mannan mannanohydrolase ame: full=beta-mannanase flags: precursor	20	3.59218e-86	0.6475	bacillus circulans mannanase complete cds	protein	nucl	nucl
THRIPS_11_08_2011_00567	Good	3	2	1.00247e-26	0.58	mana_strli ame: full=mannan endo- -beta-mannosidase ame: full= -beta-d-mannan mannanohydrolase ame: full=beta-mannanase flags: precursor	20	5.50156e-93	0.7005	paenibacillus polymyxa complete genome	uncertain	nucl	nucl
THRIPS_11_08_2011_00568	Good	3	8	1.07842e-57	0.46375	mana_strli ame: full=mannan endo- -beta-mannosidase ame: full= -beta-d-mannan mannanohydrolase ame: full=beta-mannanase flags: precursor	20	6.4639e-97	0.693	paenibacillus polymyxa complete genome	uncertain	nucl	nucl
THRIPS_11_08_2011_00569	Good	3	7	1.23956e-57	0.47	mana_strli ame: full=mannan endo- -beta-mannosidase ame: full= -beta-d-mannan mannanohydrolase ame: full=beta-mannanase flags: precursor	20	1.01443e-96	0.6935	paenibacillus polymyxa complete genome	uncertain	nucl	nucl
THRIPS_11_08_2011_00570	None	0	0			---NA---	0			---NA---	none
THRIPS_11_08_2011_00571	Good	2	20	1.32374e-105	0.5225	rho gtpase activating protein 23	20	1.57919e-99	0.6075	hydra magnipapillata protein mrna	protein	prot	nucl
THRIPS_11_08_2011_00572	Weak	2	5	8.04218e-56	0.58	gunk_fusox ame: full= endoglucanase type k ame: full=cellulase ame: full=endo- -beta-glucanase flags: precursor	20	4.91965e-135	0.7375	zea mays clone 1064245 mrna sequence	protein	nucl	nucl
THRIPS_11_08_2011_00573	Weak	0	0			---NA---	0			---NA---	none
THRIPS_11_08_2011_00575	None	0	0			---NA---	0			---NA---	none
THRIPS_11_08_2011_00576	Strong	16	20	0	0.523	mabp1_mouse ame: full=mitogen-activated protein kinase-binding protein 1 ame: full=jnk-binding protein 1 short=jnkbp-1	20	0	0.8775	tsa: apis mellifera mrna sequence	protein	nucl	nucl
THRIPS_11_08_2011_00578	None	4	20	1.46987e-33	0.736	rrna promoter binding protein	20	1.31436e-177	0.824	ciona intestinalis clone: full insert sequence	uncertain	nucl	nucl
THRIPS_11_08_2011_00579	Weak	0	0			---NA---	0			---NA---	none
THRIPS_11_08_2011_00580	None	0	0			---NA---	0			---NA---	none
THRIPS_11_08_2011_00581	Weak	0	0			---NA---	0			---NA---	none
THRIPS_11_08_2011_00582	Weak	0	0			---NA---	0			---NA---	none
THRIPS_11_08_2011_00583	Weak	3	20	2.10865e-19	0.481	ubp36_drops ame: full=ubiquitin carboxyl-terminal hydrolase 36 ame: full=deubiquitinating enzyme 36 ame: full=protein scrawny ame: full=ubiquitin thiolesterase 36 ame: full=ubiquitin-specific-processing protease 36	7	6.18423e-10	0.634286	nematostella vectensis protein partial mrna	protein	prot	nucl
THRIPS_11_08_2011_00584	Weak	44	20	6.63716e-80	0.7395	hmg2_drome ame: full=high mobility group protein dsp1 ame: full=protein dorsal switch 1	20	9.14314e-92	0.91	drosophila melanogaster dorsal switch protein 1 transcript variant mrna	protein	nucl	nucl
THRIPS_11_08_2011_00585	Weak	44	20	5.54607e-49	0.6955	hmg2_drome ame: full=high mobility group protein dsp1 ame: full=protein dorsal switch 1	20	3.55221e-55	0.881	tsa: apis mellifera mrna sequence	protein	nucl	nucl
THRIPS_11_08_2011_00586	Weak	44	20	8.03032e-76	0.7275	hmg2_drome ame: full=high mobility group protein dsp1 ame: full=protein dorsal switch 1	20	6.49199e-87	0.91	drosophila melanogaster dorsal switch protein 1 transcript variant mrna	protein	nucl	nucl
THRIPS_11_08_2011_00587	Weak	44	20	5.56118e-77	0.7525	hmg2_drome ame: full=high mobility group protein dsp1 ame: full=protein dorsal switch 1	20	8.31545e-89	0.911	drosophila melanogaster dorsal switch protein 1 transcript variant mrna	protein	nucl	nucl
THRIPS_11_08_2011_00588	Strong	75	20	0	0.633	fur2_drome ame: full=furin-like protease 2 short=furin-2 flags: precursor	20	0	0.934	drosophila melanogaster furin 2 transcript variant mrna	protein	nucl	nucl
THRIPS_11_08_2011_00589	Strong	72	20	0	0.633	fur2_drome ame: full=furin-like protease 2 short=furin-2 flags: precursor	20	0	0.934	drosophila melanogaster furin 2 transcript variant mrna	protein	nucl	nucl
THRIPS_11_08_2011_00590	Strong	9	4	1.09757e-29	0.6025	mtssl_mouse ame: full=mtss1-like protein	20	2.26044e-85	0.7365	tsa: apis mellifera mrna sequence	protein	nucl	nucl
THRIPS_11_08_2011_00591	Strong	13	9	2.1046e-88	0.541111	mtssl_mouse ame: full=mtss1-like protein	20	7.62225e-171	0.8555	tsa: apis mellifera mrna sequence	protein	nucl	nucl
THRIPS_11_08_2011_00592	Weak	12	4	1.15089e-18	0.76	mtss1_human ame: full=metastasis suppressor protein 1 ame: full=metastasis suppressor ygl-1 ame: full=missing in metastasis protein	20	8.2274e-33	0.791	tsa: apis mellifera mrna sequence	protein	nucl	nucl
THRIPS_11_08_2011_00593	Weak	0	0			---NA---	0			---NA---	none
THRIPS_11_08_2011_00594	Strong	7	20	5.82311e-134	0.504	if4g3_human ame: full=eukaryotic translation initiation factor 4 gamma 3 short=eif-4-gamma 3 short=eif-4g 3 short=eif4g 3 ame: full=eif-4-gamma ii short=eif4gii	20	3.67021e-156	0.7545	tsa: apis mellifera mrna sequence	protein	nucl	nucl
THRIPS_11_08_2011_00595	Strong	1	20	1.32606e-65	0.628	slmo_drome ame: full=protein slowmo	20	2.44124e-93	0.7985	tsa: spodoptera littoralis mrna sequence	protein	nucl	nucl
THRIPS_11_08_2011_00596	None	0	0			---NA---	0			---NA---	none
THRIPS_11_08_2011_00597	Weak	0	0			---NA---	1	2.40283e-74	0.9	phakopsora pachyrhizi clone jgiafna- complete sequence	uncertain	nucl only	nucl only
THRIPS_11_08_2011_00598	None	0	0			---NA---	0			---NA---	none
THRIPS_11_08_2011_00599	Good	2	20	3.86496e-36	0.4305	zinc finger partial	8	5.73459e-39	0.575	tsa: bemisia tabaci bt_q_zju_singletons167653 mrna sequence	protein	nucl	nucl
THRIPS_11_08_2011_00600	Good	4	2	7.75652e-07	0.575	kdm5_drome ame: full=lysine-specific demethylase lid ame: full=histone demethylase lid ame: full=jumonji arid domain-containing protein lid ame: full=protein little imaginal disks ame: full=retinoblastoma-binding protein 2 homolog	4	1.95311e-07	0.6975	apis mellifera jumonji arid domain-containing protein 1a (retinoblastoma-binding protein 2) (rbbp-2) mrna	protein	nucl	nucl
THRIPS_11_08_2011_00601	Strong	7	8	5.67596e-19	0.56875	if4b_human ame: full=eukaryotic translation initiation factor 4b short=eif-4b	20	1.32831e-42	0.6935	tsa: apis mellifera mrna sequence	protein	nucl	nucl
THRIPS_11_08_2011_00602	Strong	7	8	5.53901e-19	0.56875	if4b_human ame: full=eukaryotic translation initiation factor 4b short=eif-4b	20	1.10268e-42	0.6935	tsa: apis mellifera mrna sequence	protein	nucl	nucl
THRIPS_11_08_2011_00603	None	0	0			---NA---	0			---NA---	none
THRIPS_11_08_2011_00604	None	0	0			---NA---	0			---NA---	none
THRIPS_11_08_2011_00605	Weak	21	20	5.96519e-161	0.819	ago2_mouse ame: full=protein argonaute-2 short=argonaute2 short=mago2 ame: full=eukaryotic translation initiation factor 2c 2 short=eif-2c 2 short=eif2c 2 ame: full=piwi argonaute family protein meif2c2 ame: full=protein slicer	20	0	0.979	drosophila melanogaster argonaute-1 transcript variant mrna	protein	nucl	nucl
THRIPS_11_08_2011_00606	None	31	20	0	0.794	ago2_human ame: full=protein argonaute-2 short=argonaute2 short=hago2 ame: full=eukaryotic translation initiation factor 2c 2 short=eif-2c 2 short=eif2c 2 ame: full=paz piwi domain protein short=ppd ame: full=protein slicer	20	0	0.9715	drosophila melanogaster argonaute-1 transcript variant mrna	protein	nucl	nucl
THRIPS_11_08_2011_00607	Strong	15	20	4.72364e-128	0.805	rla0_drome ame: full=60s acidic ribosomal protein p0 ame: full=apurinic-apyrimidinic endonuclease ame: full=dna-(apurinic or apyrimidinic site) lyase	20	7.00939e-165	0.929	tsa: apis mellifera mrna sequence	protein	nucl	nucl
THRIPS_11_08_2011_00608	Strong	15	20	1.68264e-85	0.7905	rla0_drome ame: full=60s acidic ribosomal protein p0 ame: full=apurinic-apyrimidinic endonuclease ame: full=dna-(apurinic or apyrimidinic site) lyase	20	1.68291e-107	0.9215	tsa: apis mellifera mrna sequence	protein	nucl	nucl
THRIPS_11_08_2011_00609	Strong	20	20	7.17261e-129	0.7195	pabpa_xenla ame: full=polyadenylate-binding protein 1-a short=pabp-1-a short=poly -binding protein 1-a short=xpabp1-a ame: full=cytoplasmic poly -binding protein 1-a	20	3.67016e-170	0.931	tsa: apis mellifera mrna sequence	protein	nucl	nucl
THRIPS_11_08_2011_00610	Strong	18	20	1.09571e-70	0.804	rl19_drome ame: full=60s ribosomal protein l19	20	2.93372e-94	0.9565	tsa: apis mellifera mrna sequence	protein	nucl	nucl
THRIPS_11_08_2011_00611	Strong	18	20	1.5233e-75	0.7745	rl19_drome ame: full=60s ribosomal protein l19	20	2.24318e-98	0.954	tsa: apis mellifera mrna sequence	protein	nucl	nucl
THRIPS_11_08_2011_00612	Weak	0	6	1.46785e-06	0.528333	GG11743 [Drosophila erecta]	12	1.85268e-08	0.5475	drosophila yakuba ge10869 (dyak\ge10869) mrna	protein	nucl	nucl
THRIPS_11_08_2011_00613	None	4	20	3.1122e-21	0.6475	zn287_mouse ame: full=zinc finger protein 287 short=zfp-287 ame: full=zinc finger protein skat-2	20	1.02127e-44	0.813	tsa: apis mellifera mrna sequence	protein	nucl	nucl
THRIPS_11_08_2011_00615	Weak	0	0			---NA---	0			---NA---	none
THRIPS_11_08_2011_00616	Weak	3	2	3.62765e-07	0.555	gagj_drome ame: full=nucleic-acid-binding protein from mobile element jockey ame: full=orf1	20	9.97477e-14	0.6	zebrafish dna sequence from clone ch211-196f19 in linkage group complete sequence	uncertain	nucl	nucl
THRIPS_11_08_2011_00618	Weak	0	0			---NA---	0			---NA---	none
THRIPS_11_08_2011_00619	Weak	3	20	1.14035e-39	0.5875	dihydrolipoyllysine-residue acetyltransferase component of pyruvate dehydrogenase mitochondrial	20	4.30946e-58	0.7825	tsa: apis mellifera mrna sequence	protein	nucl	nucl
THRIPS_11_08_2011_00620	Weak	2	20	7.26385e-25	0.696	isoform d	20	6.47333e-35	0.812	tsa: apis mellifera mrna sequence	protein	nucl	nucl
THRIPS_11_08_2011_00621	Weak	3	1	5.43737e-06	0.36	cell wall surface anchor family protein	0			---NA---	none	prot only	prot only
THRIPS_11_08_2011_00622	None	0	0			---NA---	0			---NA---	none
THRIPS_11_08_2011_00623	None	0	0			---NA---	0			---NA---	none
THRIPS_11_08_2011_00624	Strong	1	18	3.20624e-33	0.599444	lola6_drome ame: full=longitudinals lacking isoforms n o w x y	20	4.85253e-47	0.804	tribolium castaneum longitudinals lacking transcript variant mrna	protein	nucl	nucl
THRIPS_11_08_2011_00625	Strong	1	18	4.94545e-32	0.601111	lola6_drome ame: full=longitudinals lacking isoforms n o w x y	20	2.66038e-46	0.804	tribolium castaneum longitudinals lacking transcript variant mrna	protein	nucl	nucl
THRIPS_11_08_2011_00626	Weak	0	0			---NA---	0			---NA---	none
THRIPS_11_08_2011_00627	None	0	0			---NA---	0			---NA---	none
THRIPS_11_08_2011_00628	None	0	0			---NA---	0			---NA---	none
THRIPS_11_08_2011_00629	Strong	15	20	1.13992e-103	0.5425	fat2_drome ame: full=fat-like cadherin-related tumor suppressor homolog ame: full=protein kugelei flags: precursor	20	1.42013e-159	0.7	drosophila melanogaster fat2 transcript variant mrna	protein	nucl	nucl
THRIPS_11_08_2011_00630	Strong	4	20	1.923e-17	0.453	zinc h2c2 domain containing	13	2.4374e-11	0.528462	hydra magnipapillata zinc h2c2 domain containing mrna	protein	prot	nucl
THRIPS_11_08_2011_00631	Weak	0	0			---NA---	0			---NA---	none
THRIPS_11_08_2011_00632	None	0	0			---NA---	0			---NA---	none
THRIPS_11_08_2011_00633	Good	13	20	1.26867e-33	0.833	rl37_spofr ame: full=60s ribosomal protein l37	20	1.66628e-40	0.95	tsa: acyrthosiphon pisum strain lsr1 mrna sequence	protein	nucl	nucl
THRIPS_11_08_2011_00634	Weak	0	0			---NA---	0			---NA---	none
THRIPS_11_08_2011_00635	Good	4	3	2.40361e-08	0.636667	rtf1_drome ame: full=rna polymerase-associated protein rtf1 short=drtf1	20	7.7384e-18	0.9655	tsa: apis mellifera mrna sequence	protein	nucl	nucl
THRIPS_11_08_2011_00636	None	0	0			---NA---	0			---NA---	none
THRIPS_11_08_2011_00637	Strong	7	12	1.26437e-20	0.53	tpd54_human ame: full=tumor protein d54 short=hd54 ame: full=tumor protein d52-like 2	20	6.03862e-71	0.8295	tsa: apis mellifera mrna sequence	protein	nucl	nucl
THRIPS_11_08_2011_00638	Weak	5	7	6.44481e-09	0.515714	pai2b_human ame: full=polyadenylate-binding protein-interacting protein 2b short=pabp-interacting protein 2b short=paip-2b short=poly -binding protein-interacting protein 2b	20	2.05598e-15	0.851	aedes aegypti polya-binding protein interacting protein partial mrna	protein	nucl	nucl
THRIPS_11_08_2011_00639	None	0	0			---NA---	6	6.21949e-39	0.756667	ciona clone xx- complete sequence	uncertain	nucl only	nucl only
THRIPS_11_08_2011_00640	Weak	0	4	6.15273e-13	0.6375	cg11791- isoform a	2	7.1482e-12	0.71	tribolium castaneum agap002461-pa mrna	protein	prot	nucl
THRIPS_11_08_2011_00641	Weak	4	2	9.1095e-18	0.47	go45_human ame: full=golgin-45 ame: full=basic leucine zipper nuclear factor 1 ame: full=jem-1 ame: full=p45 basic leucine-zipper nuclear factor	20	8.89683e-63	0.796	tsa: apis mellifera mrna sequence	protein	nucl	nucl
THRIPS_11_08_2011_00642	Strong	9	20	1.41075e-112	0.53	pacn2_mouse ame: full=protein kinase c and casein kinase substrate in neurons protein 2	20	0	0.905	tsa: apis mellifera mrna sequence	protein	nucl	nucl
THRIPS_11_08_2011_00643	Strong	2	9	1.42412e-33	0.465556	oxr1_rat ame: full=oxidation resistance protein 1 ame: full=protein c7	20	1.88515e-177	0.8245	tsa: apis mellifera mrna sequence	protein	nucl	nucl
THRIPS_11_08_2011_00644	Good	4	20	4.36567e-15	0.633	cah8_mouse ame: full=carbonic anhydrase-related protein short=carp ame: full=carbonic anhydrase viii short=ca-viii	20	1.11655e-33	0.7605	tsa: apis mellifera mrna sequence	protein	nucl	nucl
THRIPS_11_08_2011_00645	Weak	0	0			---NA---	0			---NA---	none
THRIPS_11_08_2011_00646	None	0	20	5.01024e-22	0.7325	hypothetical protein [Vitis vinifera]	20	6.30977e-113	0.921	exobasidium rostrupii partial 18s rrna strain pb3275	rRNA	nucl	nucl
THRIPS_11_08_2011_00647	Strong	35	20	0	0.501	npc1_human ame: full=niemann-pick c1 protein flags: precursor	20	0	0.838	tsa: apis mellifera mrna sequence	protein	nucl	nucl
THRIPS_11_08_2011_00648	Strong	34	20	0	0.498	npc1_pig ame: full=niemann-pick c1 protein flags: precursor	20	0	0.829	tsa: apis mellifera mrna sequence	protein	nucl	nucl
THRIPS_11_08_2011_00649	None	26	20	1.22647e-97	0.8455	rb11a_rat ame: full=ras-related protein rab-11a short=rab-11 ame: full=24kg	20	2.19743e-134	0.9615	tsa: apis mellifera mrna sequence	protein	nucl	nucl
THRIPS_11_08_2011_00650	None	0	0			---NA---	0			---NA---	none
THRIPS_11_08_2011_00651	Strong	5	5	3.97732e-09	0.46	c2c2l_mouse ame: full=c2 domain-containing protein 2-like ame: full=transmembrane protein 24	20	0	0.826	tsa: apis mellifera mrna sequence	protein	nucl	nucl
THRIPS_11_08_2011_00652	None	0	0			---NA---	0			---NA---	none
THRIPS_11_08_2011_00653	Weak	0	0			---NA---	0			---NA---	none
THRIPS_11_08_2011_00654	Weak	0	0			---NA---	0			---NA---	none
THRIPS_11_08_2011_00655	Weak	0	0			---NA---	0			---NA---	none
THRIPS_11_08_2011_00656	Weak	0	0			---NA---	0			---NA---	none
THRIPS_11_08_2011_00657	None	0	0			---NA---	0			---NA---	none
THRIPS_11_08_2011_00658	Strong	22	20	0	0.5905	acox1_drome ame: full=probable peroxisomal acyl-coenzyme a oxidase 1	20	0	0.8165	bombus terrestris probable peroxisomal acyl-coenzyme a oxidase 1-like mrna	protein	nucl	nucl
THRIPS_11_08_2011_00659	Weak	18	7	5.425e-08	0.867143	opa1_chick ame: full=dynamin-like 120 kda mitochondrial ame: full=optic atrophy protein 1 homolog flags: precursor	20	1.00747e-11	0.876	apis mellifera optic atrophy 1- transcript variant 2 (opa1-like) mrna	protein	nucl	nucl
THRIPS_11_08_2011_00660	Strong	43	20	2.69486e-117	0.6185	nu301_drome ame: full=nucleosome-remodeling factor subunit nurf301 ame: full=enhancer of bithorax ame: full=nucleosome-remodeling factor 215 kda subunit short=nurf-215	20	0	0.814	bombus impatiens nucleosome-remodeling factor subunit nurf301-like mrna	protein	nucl	nucl
THRIPS_11_08_2011_00661	Strong	22	20	2.74677e-57	0.6065	herc1_human ame: full=probable e3 ubiquitin-protein ligase herc1 ame: full=hect domain and rcc1-like domain-containing protein 1 ame: full=p532 ame: full=p619	20	8.45778e-66	0.879	strongylocentrotus purpuratus p532 mrna	protein	nucl	nucl
THRIPS_11_08_2011_00662	Strong	20	20	7.50423e-47	0.587	herc1_human ame: full=probable e3 ubiquitin-protein ligase herc1 ame: full=hect domain and rcc1-like domain-containing protein 1 ame: full=p532 ame: full=p619	20	3.05833e-54	0.87	strongylocentrotus purpuratus p532 mrna	protein	nucl	nucl
THRIPS_11_08_2011_00663	Strong	13	20	1.13757e-107	0.526	ggt1_rat ame: full=gamma-glutamyltranspeptidase 1 short=ggt 1 ame: full=gamma-glutamyltransferase 1 ame: cd_antigen=cd224 contains: ame: full=gamma-glutamyltranspeptidase 1 heavy chain contains: ame: full=gamma-glutamyltranspeptidase 1 light chain flags: precursor	20	0	0.6925	tsa: apis mellifera mrna sequence	protein	nucl	nucl
THRIPS_11_08_2011_00664	Strong	24	20	0	0.7115	kgp24_drome ame: full=cgmp-dependent protein isozyme 2 forms cd4 t1 t3a t3b short=cgk ame: full=foraging protein	20	0	0.917	bombus impatiens cgmp-dependent protein isozyme 2 forms cd4 t1 t3a t3b-like mrna	protein	nucl	nucl
THRIPS_11_08_2011_00665	Weak	55	20	4.55325e-53	0.64	mib1_human ame: full=e3 ubiquitin-protein ligase mib1 ame: full=dapk-interacting protein 1 short=dip-1 ame: full=mind bomb homolog 1 ame: full=zinc finger zz type with ankyrin repeat domain protein 2	20	2.01774e-70	0.783	pediculus humanus corporis mind mrna	protein	nucl	nucl
THRIPS_11_08_2011_00666	None	0	0			---NA---	1	2.80577e-10	0.8	phakopsora pachyrhizi clone jgiafna- complete sequence	uncertain	nucl only	nucl only
THRIPS_11_08_2011_00667	Weak	0	0			---NA---	0			---NA---	none
THRIPS_11_08_2011_00668	Weak	0	16	6.72195e-22	0.67625	low quality protein: protein	20	3.94242e-35	0.838	sphingobium japonicum ut26s chromosome complete genome	uncertain	nucl	nucl
THRIPS_11_08_2011_00669	Strong	14	20	6.41212e-163	0.813	gmppb_drops ame: full=mannose-1-phosphate guanyltransferase beta ame: full=gdp-mannose pyrophosphorylase b ame: full=gtp-mannose-1-phosphate guanylyltransferase beta	20	0	0.8885	drosophila melanogaster cg1129 transcript variant mrna	protein	nucl	nucl
THRIPS_11_08_2011_00670	Good	6	9	2.75255e-39	0.455556	vit2_peram ame: full=vitellogenin-2 short=vg-2 flags: precursor	20	2.57921e-61	0.5705	tribolium castaneum vitellogenin mrna	protein	nucl	nucl
THRIPS_11_08_2011_00671	None	11	20	1.13721e-45	0.898	isoform g	20	3.59068e-55	0.8935	drosophila melanogaster bent transcript variant mrna	protein	nucl	prot
THRIPS_11_08_2011_00672	Weak	15	20	0	0.669	syg_bommo ame: full=glycyl-trna synthetase ame: full=diadenosine tetraphosphate synthetase short=ap-4-a synthetase ame: full=glycine--trna ligase short=	20	0	0.8495	drosophila melanogaster glycyl-trna synthetase (aats-gly) transcript variant mrna	protein	nucl	nucl
THRIPS_11_08_2011_00673	Strong	32	20	0	0.488	npc1_human ame: full=niemann-pick c1 protein flags: precursor	20	0	0.838	tsa: apis mellifera mrna sequence	protein	nucl	nucl
THRIPS_11_08_2011_00674	None	14	15	1.10593e-128	0.526667	hm13_mouse ame: full=minor histocompatibility antigen h13 ame: full=presenilin-like protein 3 ame: full=signal peptide peptidase	20	3.84116e-168	0.8525	drosophila erecta gg24644 (dere\gg24644) mrna	protein	nucl	nucl
THRIPS_11_08_2011_00675	Weak	0	0			---NA---	0			---NA---	none
THRIPS_11_08_2011_00676	Good	0	2	6.05249e-06	0.56	rtjk_drome ame: full=rna-directed dna polymerase from mobile element jockey ame: full=reverse transcriptase	20	2.62422e-08	0.5695	drosophila sechellia telomeric retrotransposon clone	uncertain	nucl	nucl
THRIPS_11_08_2011_00677	Strong	13	17	7.54429e-28	0.521765	ell_human ame: full=rna polymerase ii elongation factor ell ame: full=eleven-nineteen lysine-rich leukemia protein	20	9.70783e-112	0.71	tsa: apis mellifera mrna sequence	protein	nucl	nucl
THRIPS_11_08_2011_00678	Good	25	12	4.34293e-18	0.819167	arp3_drome ame: full=actin-related protein 3 ame: full=actin-2 ame: full=actin-like protein 3 ame: full=actin-like protein 66b	20	5.28783e-24	0.9045	culex quinquefasciatus mrna	protein	nucl	nucl
THRIPS_11_08_2011_00679	None	0	1	2.0016e-07	0.72	titin_drome ame: full=titin ame: full=d-titin ame: full=kettin	5	5.45647e-09	0.766	acyrthosiphon pisum titin-like mrna	protein	nucl	nucl
THRIPS_11_08_2011_00680	None	0	0			---NA---	0			---NA---	none
THRIPS_11_08_2011_00681	Strong	3	13	1.75614e-09	0.704615	cysteine protease	11	2.00565e-11	0.788182	acyrthosiphon pisum cysteine protease atg4b-like mrna	protein	nucl	nucl
THRIPS_11_08_2011_00682	None	0	0			---NA---	0			---NA---	none
THRIPS_11_08_2011_00683	Weak	0	0			---NA---	0			---NA---	none
THRIPS_11_08_2011_00684	Strong	10	20	0	0.5395	sc31a_human ame: full=protein transport protein sec31a ame: full=abp125 ame: full=abp130 ame: full=sec31-like protein 1 ame: full=sec31-related protein a ame: full=web1-like protein	20	0	0.819	aedes aegypti vesicle associated protein partial mrna	protein	nucl	nucl
THRIPS_11_08_2011_00685	None	7	2	8.25728e-17	0.74	ubp34_human ame: full=ubiquitin carboxyl-terminal hydrolase 34 ame: full=deubiquitinating enzyme 34 ame: full=ubiquitin thiolesterase 34 ame: full=ubiquitin-specific-processing protease 34	20	3.36201e-31	0.81	pediculus humanus corporis ubiquitin specific mrna	protein	nucl	nucl
THRIPS_11_08_2011_00686	None	0	3	4.8586e-20	0.796667	hsp90 atpase activator	5	1.40428e-24	0.804	chromosome vii of strain gb-m1 of encephalitozoon cuniculi	uncertain	nucl	nucl
THRIPS_11_08_2011_00688	Weak	0	0			---NA---	0			---NA---	none
THRIPS_11_08_2011_00689	Strong	23	20	2.98365e-28	0.597	hecd1_mouse ame: full=e3 ubiquitin-protein ligase hectd1 ame: full=hect domain-containing protein 1 ame: full=protein open mind	20	5.17612e-85	0.8855	nasonia vitripennis e3 ubiquitin-protein ligase hectd1-like mrna	protein	nucl	nucl
THRIPS_11_08_2011_00690	Weak	0	0			---NA---	0			---NA---	none
THRIPS_11_08_2011_00691	None	0	0			---NA---	0			---NA---	none
THRIPS_11_08_2011_00692	Weak	0	0			---NA---	0			---NA---	none
THRIPS_11_08_2011_00693	Weak	0	0			---NA---	0			---NA---	none
THRIPS_11_08_2011_00694	Strong	70	20	3.57941e-106	0.755	stx1a_drome ame: full=syntaxin-1a ame: full=dsynt1	20	5.43246e-143	0.9105	acyrthosiphon pisum syntaxin 1a transcript variant mrna	protein	nucl	nucl
THRIPS_11_08_2011_00695	Weak	0	0			---NA---	0			---NA---	none
THRIPS_11_08_2011_00696	None	0	0			---NA---	0			---NA---	none
THRIPS_11_08_2011_00697	Weak	0	0			---NA---	0			---NA---	none
THRIPS_11_08_2011_00698	Weak	2	2	2.61971e-11	0.445	ygd6_schpo ame: full=zinc-type alcohol dehydrogenase-like protein	20	4.06433e-148	0.824	drosophila melanogaster cg1600 transcript variant mrna	protein	nucl	nucl
THRIPS_11_08_2011_00699	Strong	5	20	1.06113e-28	0.685	zn583_human ame: full=zinc finger protein 583 ame: full=zinc finger protein l3-5	20	2.77491e-48	0.7695	anolis carolinensis zinc finger protein 135-like mrna	protein	nucl	nucl
THRIPS_11_08_2011_00700	Good	8	20	1.87717e-11	0.875	guanyl-nucleotide exchange factor	20	1.72754e-13	0.8715	drosophila melanogaster schizo transcript variant mrna	protein	nucl	prot
THRIPS_11_08_2011_00701	None	0	0			---NA---	0			---NA---	none
THRIPS_11_08_2011_00702	Weak	0	0			---NA---	0			---NA---	none
THRIPS_11_08_2011_00703	Good	2	9	1.00548e-13	0.454444	atrn1_human ame: full=attractin-like protein 1 flags: precursor	20	1.62623e-31	0.803	aedes aegypti attractin partial mrna	protein	nucl	nucl
THRIPS_11_08_2011_00704	Strong	8	9	9.29647e-13	0.59	cbr1_pig ame: full=carbonyl reductase ame: full=20-beta-hydroxysteroid dehydrogenase ame: full=nadph-dependent carbonyl reductase 1 ame: full=prostaglandin 9-ketoreductase ame: full=prostaglandin-e 9-reductase	20	5.4074e-34	0.7505	acyrthosiphon pisum carbonyl reductase 1-like mrna	protein	nucl	nucl
THRIPS_11_08_2011_00705	None	10	8	4.52097e-15	0.78125	rs30_bovin ame: full=40s ribosomal protein s30	20	4.25517e-47	0.7965	carabus granulatus mrna for ubiquitin ribosomal protein s30e fusion protein (ubq rps30e gene)	protein	nucl	nucl
THRIPS_11_08_2011_00706	Weak	0	0			---NA---	0			---NA---	none
THRIPS_11_08_2011_00707	Weak	3	3	1.15833e-09	0.46	asph_human ame: full=aspartyl asparaginyl beta-hydroxylase ame: full=aspartate beta-hydroxylase short=asp beta-hydroxylase ame: full=peptide-aspartate beta-dioxygenase	20	6.97288e-21	0.533	homo sapiens aspartate beta-hydroxylase transcript variant mrna	protein	nucl	nucl
THRIPS_11_08_2011_00708	Weak	0	0			---NA---	0			---NA---	none
THRIPS_11_08_2011_00709	Strong	9	14	0	0.527857	sin3a_human ame: full=paired amphipathic helix protein sin3a ame: full=histone deacetylase complex subunit sin3a ame: full=transcriptional corepressor sin3a	20	0	0.9125	tsa: apis mellifera mrna sequence	protein	nucl	nucl
THRIPS_11_08_2011_00710	Weak	7	4	1.95721e-26	0.8025	gbge_calvi ame: full=guanine nucleotide-binding protein subunit gamma-e flags: precursor	20	5.28168e-33	0.956	drosophila melanogaster g protein gamma30a transcript variant mrna	protein	nucl	nucl
THRIPS_11_08_2011_00711	Weak	0	0			---NA---	0			---NA---	none
THRIPS_11_08_2011_00712	Weak	0	0			---NA---	0			---NA---	none
THRIPS_11_08_2011_00713	Weak	0	0			---NA---	0			---NA---	none
THRIPS_11_08_2011_00714	None	0	0			---NA---	0			---NA---	none
THRIPS_11_08_2011_00715	None	0	0			---NA---	0			---NA---	none
THRIPS_11_08_2011_00716	Weak	4	20	1.90461e-16	0.575	tbc1 domain family member 22b	8	5.21126e-18	0.77	bombus terrestris tbc1 domain family member 22b-like mrna	protein	nucl	nucl
THRIPS_11_08_2011_00717	None	0	0			---NA---	0			---NA---	none
THRIPS_11_08_2011_00718	Strong	4	7	1.64549e-09	0.637143	macoi_pantr ame: full=macoilin ame: full=transmembrane protein 57	20	7.35153e-17	0.6985	pediculus humanus corporis mrna	protein	nucl	nucl
THRIPS_11_08_2011_00719	Weak	5	6	4.80387e-09	0.551667	cf162_xentr ame: full=upf0708 protein c6orf162 homolog	20	3.39515e-31	0.818	drosophila melanogaster cg32448 transcript variant mrna	protein	nucl	nucl
THRIPS_11_08_2011_00720	Strong	14	20	1.62367e-12	0.6125	amp1d_mouse ame: full=methionine aminopeptidase mitochondrial flags: precursor	20	4.62723e-17	0.6555	drosophila mojavensis gi20466 (dmoj\gi20466) mrna	protein	nucl	nucl
THRIPS_11_08_2011_00721	None	0	0			---NA---	0			---NA---	none
THRIPS_11_08_2011_00722	Weak	0	0			---NA---	0			---NA---	none
THRIPS_11_08_2011_00723	Good	2	8	1.15325e-28	0.5075	vit1_aedae ame: full=vitellogenin-a1 short=vg ame: full=pvg1 contains: ame: full=vitellin light chain short=vl contains: ame: full=vitellin heavy chain short=vh flags: precursor	20	2.46369e-53	0.6225	culex quinquefasciatus vitellogenin- mrna	protein	nucl	nucl
THRIPS_11_08_2011_00724	Weak	0	0			---NA---	0			---NA---	none
THRIPS_11_08_2011_00725	Strong	1	12	1.25367e-60	0.698333	ubtd1_danre ame: full=ubiquitin domain-containing protein 1	20	2.04614e-103	0.9165	bombus terrestris ubiquitin domain-containing protein 2-like mrna	protein	nucl	nucl
THRIPS_11_08_2011_00726	Weak	0	0			---NA---	0			---NA---	none
THRIPS_11_08_2011_00727	None	0	0			---NA---	0			---NA---	none
THRIPS_11_08_2011_00728	Weak	0	0			---NA---	0			---NA---	none
THRIPS_11_08_2011_00729	None	13	9	2.18044e-17	0.844444	spt4h_drome ame: full=transcription elongation factor spt4 ame: full=drb sensitivity-inducing factor small subunit short=dsif small subunit ame: full=dspt4	20	8.72559e-20	0.878	acyrthosiphon pisum transcription elongation factor spt4-like mrna	protein	nucl	nucl
THRIPS_11_08_2011_00730	Weak	0	0			---NA---	0			---NA---	none
THRIPS_11_08_2011_00731	Weak	0	0			---NA---	0			---NA---	none
THRIPS_11_08_2011_00732	None	0	0			---NA---	0			---NA---	none
THRIPS_11_08_2011_00733	Weak	2	14	4.70274e-29	0.458571	isoform c	12	1.85419e-31	0.8075	apis mellifera transcript variant 1 mrna	protein	nucl	nucl
THRIPS_11_08_2011_00734	None	0	0			---NA---	0			---NA---	none
THRIPS_11_08_2011_00735	Good	10	20	4.3007e-26	0.4675	pla1a_rat ame: full=phospholipase a1 member a ame: full=phosphatidylserine-specific phospholipase a1 short=ps-pla1 flags: precursor	20	1.97756e-43	0.5925	tsa: apis mellifera mrna sequence	protein	nucl	nucl
THRIPS_11_08_2011_00736	Weak	0	0			---NA---	0			---NA---	none
THRIPS_11_08_2011_00737	Strong	3	20	8.08324e-40	0.4315	zn418_human ame: full=zinc finger protein 418	20	1.6883e-37	0.507	strongylocentrotus purpuratus hypothetical loc578854 mrna	protein	prot	nucl
THRIPS_11_08_2011_00738	Strong	21	11	0	0.662727	xpo1_mouse ame: full=exportin-1 short=exp1 ame: full=chromosome region maintenance 1 protein homolog	20	0	0.88	tsa: apis mellifera mrna sequence	protein	nucl	nucl
THRIPS_11_08_2011_00739	Weak	6	20	3.9427e-36	0.7775	isoform a	20	8.63917e-40	0.833	tsa: apis mellifera mrna sequence	protein	nucl	nucl
THRIPS_11_08_2011_00740	Good	8	20	9.89513e-25	0.451	lipp_myoco ame: full=pancreatic triacylglycerol lipase short=pl short=pancreatic lipase flags: precursor	20	2.74281e-52	0.6755	aedes aegypti vitellogenin partial mrna	protein	nucl	nucl
THRIPS_11_08_2011_00741	Good	0	0			---NA---	0			---NA---	none
THRIPS_11_08_2011_00742	Good	49	20	2.13787e-134	0.6705	hxk2_drome ame: full=hexokinase type 2	20	0	0.8485	aedes aegypti hexokinase partial mrna	protein	nucl	nucl
THRIPS_11_08_2011_00743	Strong	11	20	0	0.58	atp9b_bovin ame: full=probable phospholipid-transporting atpase iib ame: full=atpase class ii type 9b	20	0	0.898	tsa: apis mellifera mrna sequence	protein	nucl	nucl
THRIPS_11_08_2011_00744	Strong	6	17	1.70701e-118	0.575882	spx2_mouse ame: full=sugar phosphate exchanger 2 ame: full=solute carrier family 37 member 2 ame: full=camp-inducible protein 2	20	9.05639e-138	0.7035	drosophila melanogaster cg10069 transcript variant mrna	protein	nucl	nucl
THRIPS_11_08_2011_00745	Strong	5	20	0	0.633	btbd3_mouse ame: full=btb poz domain-containing protein 3	20	0	0.9075	pediculus humanus corporis btb poz domain-containing mrna	protein	nucl	nucl
THRIPS_11_08_2011_00746	Weak	13	20	6.09651e-171	0.818	kc1g3_rat ame: full=casein kinase i isoform gamma-3 short=cki-gamma 3	20	0	0.9395	drosophila melanogaster gilgamesh transcript variant mrna	protein	nucl	nucl
THRIPS_11_08_2011_00747	Strong	12	14	1.05041e-54	0.614286	tp4a1_rat ame: full=protein tyrosine phosphatase type iva 1 ame: full=protein-tyrosine phosphatase 4a1 ame: full=protein-tyrosine phosphatase of regenerating liver 1 short=prl-1 flags: precursor	20	5.07157e-91	0.89	tsa: apis mellifera mrna sequence	protein	nucl	nucl
THRIPS_11_08_2011_00748	Strong	21	20	0	0.7	clcn3_human ame: full=h(+) cl(-) exchange transporter 3 ame: full=chloride channel protein 3 short= -3 ame: full=chloride transporter -3	20	0	0.8385	drosophila melanogaster chloride channel-c ( -c) transcript variant mrna	protein	nucl	nucl
THRIPS_11_08_2011_00749	Strong	2	1	3.23445e-08	0.4	modu_drome ame: full=dna-binding protein modulo	0			---NA---	none	prot only	prot only
THRIPS_11_08_2011_00750	Good	3	20	5.95103e-45	0.524	pelb_aspfc ame: full=probable pectin lyase b short=plb flags: precursor	20	3.01133e-44	0.5975	phytophthora capsici pectate lyase complete cds	protein	prot	nucl
THRIPS_11_08_2011_00751	Strong	3	20	1.64583e-68	0.5415	osbl6_human ame: full=oxysterol-binding protein 6 short=orp-6 short=osbp-related protein 6	20	3.46682e-100	0.7265	homo sapiens oxysterol binding 6 transcript variant mrna	protein	nucl	nucl
THRIPS_11_08_2011_00752	Good	2	17	0	0.471176	vp13c_human ame: full=vacuolar protein sorting-associated protein 13c	20	0	0.8135	tribolium castaneum vacuolar protein sorting-associated protein partial mrna	protein	nucl	nucl
THRIPS_11_08_2011_00753	Strong	24	20	3.40133e-57	0.514	ud2c1_rabit ame: full=udp-glucuronosyltransferase 2c1 short=udpgt 2c1	20	3.81643e-95	0.651	tribolium castaneum glucosyl glucuronosyl transferases mrna	protein	nucl	nucl
THRIPS_11_08_2011_00754	Strong	14	8	3.36731e-35	0.61875	snx18_mouse ame: full=sorting nexin-18 ame: full=sorting nexin-associated golgi protein 1	20	8.78217e-60	0.6925	pediculus humanus corporis sorting nexin- mrna	protein	nucl	nucl
THRIPS_11_08_2011_00755	Strong	3	6	0	0.593333	cnot1_mouse ame: full=ccr4-not transcription complex subunit 1 ame: full=ccr4-associated factor 1	20	0	0.89	tsa: apis mellifera mrna sequence	protein	nucl	nucl
THRIPS_11_08_2011_00756	Strong	15	16	5.16177e-149	0.715	p4k2b_danre ame: full=phosphatidylinositol 4-kinase type 2-beta ame: full=phosphatidylinositol 4-kinase type ii-beta	20	0	0.865	tsa: apis mellifera mrna sequence	protein	nucl	nucl
THRIPS_11_08_2011_00757	Good	3	0			---NA---	0			---NA---	none
THRIPS_11_08_2011_00758	None	0	0			---NA---	0			---NA---	none
THRIPS_11_08_2011_00759	Strong	16	12	0	0.614167	ubr4_human ame: full=e3 ubiquitin-protein ligase ubr4 ame: full=600 kda retinoblastoma protein-associated factor ame: full=n-recognin-4 ame: full=retinoblastoma-associated factor of 600 kda short=rbaf600 short=p600 ame: full=zinc finger ubr1-type protein 1	20	0	0.8335	tsa: apis mellifera mrna sequence	protein	nucl	nucl
THRIPS_11_08_2011_00760	None	0	0			---NA---	0			---NA---	none
THRIPS_11_08_2011_00762	Weak	0	0			---NA---	0			---NA---	none
THRIPS_11_08_2011_00763	None	0	0			---NA---	0			---NA---	none
THRIPS_11_08_2011_00764	Weak	0	0			---NA---	0			---NA---	none
THRIPS_11_08_2011_00765	Good	30	20	1.03244e-29	0.4555	tripb_human ame: full=thyroid receptor-interacting protein 11 short=tr-interacting protein 11 short=trip-11 ame: full=clonal evolution-related gene on chromosome 14 protein ame: full=golgi-associated microtubule-binding protein 210 short=gmap-210 ame: full=trip230	20	2.15464e-60	0.64	aedes aegypti slender lobes partial mrna	protein	nucl	nucl
THRIPS_11_08_2011_00766	Weak	0	0			---NA---	0			---NA---	none
THRIPS_11_08_2011_00767	Weak	10	1	1.71177e-06	0.49	topk_danre ame: full=lymphokine-activated killer t-cell-originated protein kinase homolog ame: full=pdz-binding kinase	0			---NA---	none	prot only	prot only
THRIPS_11_08_2011_00768	None	0	0			---NA---	0			---NA---	none
THRIPS_11_08_2011_00769	Good	16	20	6.34148e-17	0.735	lonp2_mouse ame: full=lon protease homolog peroxisomal ame: full=lon protease-like protein 2 short=lon protease 2 ame: full=peroxisomal lon protease	20	4.78261e-20	0.745	mus musculus lon peptidase peroxisomal transcript variant mrna	protein	nucl	nucl
THRIPS_11_08_2011_00770	None	3	20	8.03505e-23	0.7015	transposase is3 is911 family protein	20	1.07468e-27	0.7245	yersinia pestis complete genome	uncertain	nucl	nucl
THRIPS_11_08_2011_00771	None	0	0			---NA---	0			---NA---	none
THRIPS_11_08_2011_00772	Weak	0	0			---NA---	0			---NA---	none
THRIPS_11_08_2011_00773	Weak	24	9	1.66261e-09	0.541111	ilpr_brala ame: full=insulin-like peptide receptor short=ilp receptor contains: ame: full=insulin-like peptide receptor alpha chain contains: ame: full=insulin-like peptide receptor beta chain flags: precursor	20	1.18834e-12	0.6925	apis mellifera insulin-like receptor-like ( -2) mrna	protein	nucl	nucl
THRIPS_11_08_2011_00776	None	0	0			---NA---	0			---NA---	none
THRIPS_11_08_2011_00778	Weak	0	0			---NA---	0			---NA---	none
THRIPS_11_08_2011_00779	None	0	0			---NA---	0			---NA---	none
THRIPS_11_08_2011_00780	None	0	0			---NA---	0			---NA---	none
THRIPS_11_08_2011_00782	Weak	1	3	1.21738e-10	0.546667	parf_human ame: full= gtp-binding protein parf ame: full=partner of arf	4	6.1175e-18	0.6825	bombus impatiens gtp-binding protein parf-like mrna	protein	nucl	nucl
THRIPS_11_08_2011_00783	Good	7	6	4.28287e-13	0.571667	syym_drome ame: full=probable tyrosyl-trna mitochondrial ame: full=tyrosine--trna ligase short= flags: precursor	20	3.64501e-16	0.6275	aedes aegypti tyrosyl-trna synthetase partial mrna	protein	nucl	nucl
THRIPS_11_08_2011_00784	Weak	0	0			---NA---	0			---NA---	none
THRIPS_11_08_2011_00785	None	0	0			---NA---	0			---NA---	none
THRIPS_11_08_2011_00786	Strong	4	15	5.30887e-16	0.624	msto1_danre ame: full=protein misato homolog 1	20	8.19509e-22	0.7585	tribolium castaneum misato cg1424-pa mrna	protein	nucl	nucl
THRIPS_11_08_2011_00787	Weak	0	0			---NA---	0			---NA---	none
THRIPS_11_08_2011_00788	Strong	1	18	1.32228e-14	0.71	lolal_drome ame: full=longitudinals lacking short=lola-like protein ame: full=protein batman	20	1.64658e-19	0.8225	aedes aegypti abrupt protein partial mrna	protein	nucl	nucl
THRIPS_11_08_2011_00789	None	0	0			---NA---	0			---NA---	none
THRIPS_11_08_2011_00790	Weak	0	0			---NA---	0			---NA---	none
THRIPS_11_08_2011_00791	Strong	9	8	1.70933e-34	0.5875	arhg7_rat ame: full=rho guanine nucleotide exchange factor 7 ame: full=beta-pix ame: full=pak-interacting exchange factor beta	20	1.00558e-43	0.806	drosophila melanogaster rho-type guanine exchange factor transcript variant mrna	protein	nucl	nucl
THRIPS_11_08_2011_00792	Weak	0	0			---NA---	0			---NA---	none
THRIPS_11_08_2011_00793	None	0	0			---NA---	0			---NA---	none
THRIPS_11_08_2011_00794	Strong	21	16	1.85521e-98	0.568125	trio_human ame: full=triple functional domain protein ame: full=ptprf-interacting protein	20	0	0.839	drosophila melanogaster trio transcript variant mrna	protein	nucl	nucl
THRIPS_11_08_2011_00795	None	0	0			---NA---	0			---NA---	none
THRIPS_11_08_2011_00796	None	0	0			---NA---	0			---NA---	none
THRIPS_11_08_2011_00797	None	0	0			---NA---	0			---NA---	none
THRIPS_11_08_2011_00798	None	0	0			---NA---	0			---NA---	none
THRIPS_11_08_2011_00799	Weak	0	0			---NA---	0			---NA---	none
THRIPS_11_08_2011_00800	Weak	0	0			---NA---	0			---NA---	none
THRIPS_11_08_2011_00801	None	0	0			---NA---	0			---NA---	none
THRIPS_11_08_2011_00802	Weak	0	0			---NA---	0			---NA---	none
THRIPS_11_08_2011_00803	Weak	0	0			---NA---	0			---NA---	none
THRIPS_11_08_2011_00804	Good	2	9	3.15873e-16	0.586667	tssc1_human ame: full=protein tssc1 ame: full=tumor-suppressing stf cdna 1 protein ame: full=tumor-suppressing subchromosomal transferable fragment candidate gene 1 protein	20	1.23788e-26	0.6635	acyrthosiphon pisum protein tssc1-like mrna	protein	nucl	nucl
THRIPS_11_08_2011_00805	Weak	0	0			---NA---	0			---NA---	none
THRIPS_11_08_2011_00806	None	0	0			---NA---	0			---NA---	none
THRIPS_11_08_2011_00807	Weak	0	0			---NA---	0			---NA---	none
THRIPS_11_08_2011_00808	None	0	1	1.5713e-07	0.65	y114_chlmu ame: full=uncharacterized protein tc_0114	20	5.28156e-41	0.851	serratia complete genome	uncertain	nucl	nucl
THRIPS_11_08_2011_00810	Good	0	1	3.98109e-06	0.85	x-linked retinitis pigmentosa gtpase regulator-like protein	4	1.75422e-07	0.81	bombus terrestris hypothetical loc100644008 miscrna	miscrna	nucl	prot
THRIPS_11_08_2011_00811	Weak	0	0			---NA---	0			---NA---	none
THRIPS_11_08_2011_00812	Strong	1	7	4.15037e-19	0.605714	down syndrome cell adhesion molecule-like protein 1	5	8.91906e-21	0.69	bombus impatiens contactin-5-like mrna	protein	nucl	nucl
THRIPS_11_08_2011_00813	None	0	0			---NA---	0			---NA---	none
THRIPS_11_08_2011_00814	None	0	0			---NA---	0			---NA---	none
THRIPS_11_08_2011_00815	Weak	0	0			---NA---	0			---NA---	none
THRIPS_11_08_2011_00816	None	2	1	4.84159e-07	0.6	ibtk_xenla ame: full=inhibitor of bruton tyrosine kinase short=ibtk	12	3.81999e-09	0.665	tribolium castaneum rcg25208 mrna	protein	nucl	nucl
THRIPS_11_08_2011_00817	Strong	3	20	4.67856e-12	0.579	zn595_human ame: full=zinc finger protein 595	20	8.38541e-16	0.6045	rattus norvegicus zinc finger protein 286a mrna	protein	nucl	nucl
THRIPS_11_08_2011_00818	Weak	0	0			---NA---	0			---NA---	none
THRIPS_11_08_2011_00819	Strong	1	7	6.77057e-11	0.617143	sumf1_human ame: full=sulfatase-modifying factor 1 ame: full=c-alpha-formylglycine-generating enzyme 1 flags: precursor	20	1.02314e-20	0.703	strongylocentrotus purpuratus c-alpha-formyglycine-generating enzyme mrna	protein	nucl	nucl
THRIPS_11_08_2011_00820	None	0	0			---NA---	0			---NA---	none
THRIPS_11_08_2011_00821	None	0	0			---NA---	0			---NA---	none
THRIPS_11_08_2011_00822	Good	3	2	1.04925e-06	0.76	papog_human ame: full=poly polymerase gamma short=pap-gamma ame: full=neo-poly polymerase short=neo-pap ame: full=polynucleotide adenylyltransferase gamma ame: full=srp rna 3 -adenylating enzyme	20	9.3061e-09	0.7495	nasonia vitripennis poly polymerase gamma-like mrna	protein	nucl	prot
THRIPS_11_08_2011_00823	None	0	0			---NA---	0			---NA---	none
THRIPS_11_08_2011_00824	Weak	0	0			---NA---	0			---NA---	none
THRIPS_11_08_2011_00825	Weak	0	8	3.61208e-09	0.545	bbd14-like protein	20	1.65127e-15	0.54	caenorhabditis elegans yac complete sequence	uncertain	nucl	prot
THRIPS_11_08_2011_00826	Weak	0	0			---NA---	0			---NA---	none
THRIPS_11_08_2011_00827	None	0	0			---NA---	0			---NA---	none
THRIPS_11_08_2011_00828	Weak	0	3	5.02284e-09	0.85	ankyrin repeat-containing	1	1.78113e-11	0.88	tribolium castaneum ga11625-pa mrna	protein	nucl	nucl
THRIPS_11_08_2011_00829	Good	0	0			---NA---	0			---NA---	none
THRIPS_11_08_2011_00830	Weak	0	2	1.56659e-10	0.8	hypothetical protein Eint_040520 [Encephalitozoon intestinalis ATCC 50506]	5	1.1757e-11	0.776	chromosome iv of strain gb-m1 of encephalitozoon cuniculi	uncertain	nucl	prot
THRIPS_11_08_2011_00831	None	14	4	1.19016e-15	0.6325	m3k15_human ame: full=mitogen-activated protein kinase kinase kinase 15 ame: full=apoptosis signal-regulating kinase 3 ame: full=mapk erk kinase kinase 15 short=mek kinase 15 short=mekk 15	20	1.735e-30	0.7105	bos taurus mitogen-activated protein kinase kinase kinase 15 mrna	protein	nucl	nucl
THRIPS_11_08_2011_00832	None	0	0			---NA---	0			---NA---	none
THRIPS_11_08_2011_00833	None	0	0			---NA---	0			---NA---	none
THRIPS_11_08_2011_00834	Good	33	20	6.50625e-22	0.74	glym_human ame: full=serine mitochondrial short=shmt ame: full=glycine hydroxymethyltransferase ame: full=serine methylase flags: precursor	20	1.59243e-26	0.802	homo sapiens serine hydroxymethyltransferase 2 transcript variant non-coding rna	miscrna	nucl	nucl
THRIPS_11_08_2011_00835	Weak	0	0			---NA---	0			---NA---	none
THRIPS_11_08_2011_00836	Weak	0	0			---NA---	1	7.3076e-43	1	phakopsora pachyrhizi clone jgiafna- complete sequence	uncertain	nucl only	nucl only
THRIPS_11_08_2011_00837	None	0	0			---NA---	0			---NA---	none
THRIPS_11_08_2011_00838	Weak	0	0			---NA---	0			---NA---	none
THRIPS_11_08_2011_00839	None	1	10	4.23812e-08	0.587	tudor domain-containing protein 7	6	5.01188e-09	0.583333	anopheles gambiae pest agap011088-pa complete cds	protein	nucl	prot
THRIPS_11_08_2011_00840	None	0	0			---NA---	0			---NA---	none
THRIPS_11_08_2011_00841	Weak	2	8	2.00634e-11	0.625	f-box lrr-repeat protein 7	6	8.38639e-18	0.763333	bombus terrestris hypothetical loc100648523 miscrna	miscrna	nucl	nucl
THRIPS_11_08_2011_00842	Good	1	17	1.40758e-11	0.89	trafficking protein particle complex subunit 5	19	8.72761e-16	0.828947	dna sequence from clone aehm- complete sequence	uncertain	nucl	prot
THRIPS_11_08_2011_00843	Good	1	1	1.2004e-07	0.64	aktip_nemve ame: full=protein aktip homolog ame: full=fused toes protein homolog	10	1.47494e-09	0.716	strongylocentrotus purpuratus hypothetical loc578956 mrna	protein	nucl	nucl
THRIPS_11_08_2011_00844	Weak	22	20	3.94224e-27	0.791	klf13_human ame: full=krueppel-like factor 13 ame: full=basic transcription element-binding protein 3 short=bte-binding protein 3 ame: full=novel sp1-like zinc finger transcription factor 1 ame: full=rantes factor of late activated t-lymphocytes 1 short=rflat-1 ame: full=transcription factor bteb3 ame: full=transcription factor nslp1	20	5.87166e-43	0.751	sus scrofa kruppel-like factor 13 complete cds	protein	nucl	prot
THRIPS_11_08_2011_00845	Strong	1	1	1.36395e-35	0.83	ptp10_drome ame: full=tyrosine-protein phosphatase 10d ame: full=receptor-linked protein-tyrosine phosphatase 10d short=dptp10d flags: precursor	20	3.12119e-40	0.886	drosophila melanogaster protein tyrosine phosphatase 10d transcript variant mrna	protein	nucl	nucl
THRIPS_11_08_2011_00846	None	2	4	6.08956e-53	0.71	wahs7_human ame: full=wash complex subunit 7	20	8.85154e-66	0.7915	bos taurus kiaa1033 ortholog mrna	protein	nucl	nucl
THRIPS_11_08_2011_00847	Weak	0	0			---NA---	0			---NA---	none
THRIPS_11_08_2011_00848	Weak	0	0			---NA---	0			---NA---	none
THRIPS_11_08_2011_00849	Weak	0	0			---NA---	0			---NA---	none
THRIPS_11_08_2011_00850	None	0	0			---NA---	0			---NA---	none
THRIPS_11_08_2011_00851	None	0	0			---NA---	0			---NA---	none
THRIPS_11_08_2011_00852	Weak	0	0			---NA---	0			---NA---	none
THRIPS_11_08_2011_00853	None	0	0			---NA---	0			---NA---	none
THRIPS_11_08_2011_00854	Weak	0	0			---NA---	0			---NA---	none
THRIPS_11_08_2011_00855	Weak	3	8	4.02619e-14	0.6725	midasin (midas-containing protein)	1	7.88482e-07	0.61	nasonia vitripennis midasin-like mrna	protein	prot	prot
THRIPS_11_08_2011_00856	None	0	0			---NA---	4	1.91674e-09	0.6025	zebrafish dna sequence from clone ch1073-455m16 in linkage group complete sequence	uncertain	nucl only	nucl only
THRIPS_11_08_2011_00858	None	2	1	4.00015e-06	0.51	rna binding motif protein 34	0			---NA---	none	prot only	prot only
THRIPS_11_08_2011_00859	None	0	0			---NA---	0			---NA---	none
THRIPS_11_08_2011_00861	None	0	0			---NA---	0			---NA---	none
THRIPS_11_08_2011_00862	Strong	2	1	8.61654e-06	0.52	cadm2_human ame: full=cell adhesion molecule 2 ame: full=immunoglobulin superfamily member 4d short= 4d ame: full=nectin-like protein 3 short=necl-3 flags: precursor	20	1.71691e-14	0.6775	drosophila melanogaster clone complete sequence	uncertain	nucl	nucl
THRIPS_11_08_2011_00863	None	0	0			---NA---	0			---NA---	none
THRIPS_11_08_2011_00864	Weak	0	0			---NA---	0			---NA---	none
THRIPS_11_08_2011_00865	None	0	0			---NA---	0			---NA---	none
THRIPS_11_08_2011_00866	Weak	0	0			---NA---	0			---NA---	none
THRIPS_11_08_2011_00867	None	0	0			---NA---	0			---NA---	none
THRIPS_11_08_2011_00868	None	0	0			---NA---	0			---NA---	none
THRIPS_11_08_2011_00869	Weak	0	0			---NA---	0			---NA---	none
THRIPS_11_08_2011_00870	None	0	0			---NA---	0			---NA---	none
THRIPS_11_08_2011_00871	None	0	0			---NA---	0			---NA---	none
THRIPS_11_08_2011_00872	None	0	0			---NA---	0			---NA---	none
THRIPS_11_08_2011_00873	Strong	23	16	1.66261e-09	0.608125	ece2_human ame: full=endothelin-converting enzyme 2 short=ece-2 includes: ame: full=methyltransferase-like region includes: ame: full=endothelin-converting enzyme 2 region	20	4.54338e-24	0.788	acyrthosiphon pisum neprilysin-2-like mrna	protein	nucl	nucl
THRIPS_11_08_2011_00874	Weak	3	1	6.83371e-06	0.69	rna polymerase ii subunit a c-terminal domain phosphatase	0			---NA---	none	prot only	prot only
THRIPS_11_08_2011_00875	None	0	0			---NA---	0			---NA---	none
THRIPS_11_08_2011_00876	None	0	0			---NA---	0			---NA---	none
THRIPS_11_08_2011_00877	Strong	6	20	4.94896e-58	0.633	ppil4_human ame: full=peptidyl-prolyl cis-trans isomerase-like 4 short=ppiase ame: full=cyclophilin-like protein ppil4 ame: full=rotamase ppil4	20	1.71788e-91	0.824	ciona intestinalis clone: full insert sequence	uncertain	nucl	nucl
THRIPS_11_08_2011_00878	Weak	0	0			---NA---	0			---NA---	none
THRIPS_11_08_2011_00880	Weak	0	0			---NA---	0			---NA---	none
THRIPS_11_08_2011_00881	None	0	0			---NA---	0			---NA---	none
THRIPS_11_08_2011_00882	None	0	0			---NA---	0			---NA---	none
THRIPS_11_08_2011_00883	None	29	20	3.85589e-55	0.6435	phkg1_human ame: full=phosphorylase b kinase gamma catalytic skeletal muscle isoform ame: full=phosphorylase kinase subunit gamma-1	20	2.90115e-125	0.875	apis mellifera phosphorylase kinase transcript variant 2 mrna	protein	nucl	nucl
THRIPS_11_08_2011_00884	None	0	0			---NA---	0			---NA---	none
THRIPS_11_08_2011_00885	None	0	0			---NA---	0			---NA---	none
THRIPS_11_08_2011_00886	None	0	0			---NA---	0			---NA---	none
THRIPS_11_08_2011_00887	Strong	2	2	2.00175e-62	0.525	nbas_human ame: full=neuroblastoma-amplified sequence ame: full=neuroblastoma-amplified gene protein	20	6.63872e-57	0.6395	homo sapiens mrna cdna dkfzp586g1219 (from clone dkfzp586g1219) partial cds	protein	prot	nucl
THRIPS_11_08_2011_00888	None	0	0			---NA---	0			---NA---	none
THRIPS_11_08_2011_00889	None	0	0			---NA---	0			---NA---	none
THRIPS_11_08_2011_00890	Weak	0	0			---NA---	0			---NA---	none
THRIPS_11_08_2011_00891	None	0	0			---NA---	0			---NA---	none
THRIPS_11_08_2011_00892	None	0	0			---NA---	0			---NA---	none
THRIPS_11_08_2011_00893	Weak	0	0			---NA---	0			---NA---	none
THRIPS_11_08_2011_00894	Strong	6	3	5.32084e-48	0.71	cnot3_mouse ame: full=ccr4-not transcription complex subunit 3 ame: full=ccr4-associated factor 3	20	4.43826e-70	0.897	nasonia vitripennis ccr4-not transcription complex subunit 3-like mrna	protein	nucl	nucl
THRIPS_11_08_2011_00895	Good	5	2	3.72658e-42	0.595	trnt1_mouse ame: full=trna-nucleotidyltransferase mitochondrial ame: full=mitochondrial trna nucleotidyl cca-adding short=mt cca-adding enzyme short=mt trna cca-diphosphorylase short=mt trna cca-pyrophosphorylase short=mt trna adenylyltransferase flags: precursor	20	1.65965e-64	0.7405	drosophila melanogaster cg2100 transcript variant mrna	protein	nucl	nucl
THRIPS_11_08_2011_00896	None	0	0			---NA---	0			---NA---	none
THRIPS_11_08_2011_00897	Strong	1	2	2.78361e-07	0.695	inositol polyphosphate 1-phosphatase	3	1.77017e-09	0.69	acyrthosiphon pisum inositol polyphosphate 1-phosphatase-like mrna	protein	nucl	prot
THRIPS_11_08_2011_00898	Strong	7	20	2.75247e-87	0.6885	wipi3_xentr ame: full=wd repeat domain phosphoinositide-interacting protein 3 short=wipi-3 ame: full=wd repeat-containing protein 45-like short=wdr45-like protein	20	5.89595e-112	0.881	nasonia vitripennis wd repeat domain phosphoinositide-interacting protein 3-like mrna	protein	nucl	nucl
THRIPS_11_08_2011_00899	Strong	3	2	1.40093e-43	0.575	nbas_danre ame: full=neuroblastoma-amplified sequence ame: full=neuroblastoma-amplified gene protein homolog	20	1.03048e-63	0.66	bos taurus neuroblastoma amplified sequence mrna	protein	nucl	nucl
THRIPS_11_08_2011_00900	Weak	0	1	6.62915e-11	0.5	phd finger protein	18	7.44863e-10	0.553889	lodderomyces elongisporus nrrl yb-4239 protein partial mrna	protein	prot	nucl
THRIPS_11_08_2011_00901	Weak	1	8	2.22986e-11	0.425	unknown [Helicoverpa armigera]	5	2.21102e-09	0.536	Helicoverpa armigera unknown mRNA	uncertain	prot	nucl
THRIPS_11_08_2011_00902	None	0	0			---NA---	0			---NA---	none
THRIPS_11_08_2011_00903	None	17	3	1.0772e-16	0.82	serp2_human ame: full=stress-associated endoplasmic reticulum protein 2 ame: full=ribosome-associated membrane protein ramp4-2	20	1.20125e-23	0.9215	xenopsylla cheopis clone xc-73 ribosome-associated membrane protein complete cds	protein	nucl	nucl
THRIPS_11_08_2011_00904	Strong	17	20	0	0.729	pde4b_drome ame: full=camp-specific 3 -cyclic phosphodiesterase ame: full=learning memory process protein ame: full=protein dunce	20	0	0.876	drosophila melanogaster dunce transcript variant mrna	protein	nucl	nucl
THRIPS_11_08_2011_00905	Strong	13	20	4.68753e-95	0.7605	rl7a_drome ame: full=60s ribosomal protein l7a	20	1.74573e-122	0.9025	zea mays 60s ribosomal protein l7a mrna	protein	nucl	nucl
THRIPS_11_08_2011_00906	Strong	38	15	1.2215e-138	0.592667	jip4_mouse ame: full=c-jun-amino-terminal kinase-interacting protein 4 short=jip-4 short=jnk-interacting protein 4 ame: full=jnk-associated leucine-zipper protein short=jlp ame: full=jnk sapk-associated protein 2 short=jsap2 ame: full=mitogen-activated protein kinase 8-interacting protein 4 ame: full=sperm-associated antigen 9	20	0	0.8975	monodelphis domestica sperm associated antigen 9 mrna	protein	nucl	nucl
THRIPS_11_08_2011_00907	Weak	0	0			---NA---	0			---NA---	none
THRIPS_11_08_2011_00908	Good	19	20	2.65698e-58	0.862	rs15_elaol ame: full=40s ribosomal protein s15	20	1.34413e-78	0.961	bombyx mori ribosomal protein s15 complete cds	protein	nucl	nucl
THRIPS_11_08_2011_00909	Good	4	5	1.49087e-14	0.6	pcnp_bovin ame: full=pest proteolytic signal-containing nuclear protein short=pcnp short=pest-containing nuclear protein	20	1.1534e-16	0.7845	oryctolagus cuniculus pest proteolytic signal containing nuclear protein mrna	protein	nucl	nucl
THRIPS_11_08_2011_00910	Weak	0	0			---NA---	0			---NA---	none
THRIPS_11_08_2011_00911	Strong	2	20	8.45272e-34	0.5485	gst1d_anoga ame: full=glutathione s-transferase isoform d ame: full= st1-alpha ame: full=aggst1-1 ame: full=aggst1-6 ame: full=aggst2-1 ame: full=gst class-theta	20	1.05178e-36	0.6625	periplaneta americana glutathione s transferase class theta variant 5 complete alternatively spliced	protein	nucl	nucl
THRIPS_11_08_2011_00912	None	0	0			---NA---	0			---NA---	none
THRIPS_11_08_2011_00913	Good	1	13	4.20286e-17	0.508462	ten3_danre ame: full=teneurin-3 short=ten-3 ame: full=protein odd oz ten-m homolog 3 ame: full=tenascin-m3 short=ten-m3	20	1.90176e-105	0.8685	drosophila melanogaster tenascin major (ten-m) transcript variant mrna	protein	nucl	nucl
THRIPS_11_08_2011_00914	Strong	45	20	1.17272e-13	0.469	titin_mouse ame: full=titin ame: full=connectin	20	3.2952e-41	0.6395	drosophila melanogaster sticks and stones transcript variant mrna	protein	nucl	nucl
THRIPS_11_08_2011_00915	Strong	17	20	2.35295e-75	0.6725	hmgcl_bovin ame: full=hydroxymethylglutaryl- mitochondrial short=hl short=hmg- lyase ame: full=3-hydroxy-3-methylglutarate- lyase flags: precursor	20	4.02088e-95	0.826	strongylocentrotus purpuratus mgc82338 protein mrna	protein	nucl	nucl
THRIPS_11_08_2011_00916	None	0	0			---NA---	0			---NA---	none
THRIPS_11_08_2011_00917	None	3	1	8.73638e-06	0.73	mpu1_mouse ame: full=mannose-p-dolichol utilization defect 1 protein ame: full=suppressor of lec15 and lec35 glycosylation mutation homolog short=sl15	10	3.48811e-07	0.75	oreochromis niloticus mannose-p-dolichol utilization defect 1 mrna	protein	nucl	nucl
THRIPS_11_08_2011_00918	Strong	2	6	3.68881e-14	0.656667	k1143_bovin ame: full=uncharacterized protein kiaa1143 homolog	20	1.33547e-17	0.834	anopheles gambiae pest agap006600-pa complete cds	protein	nucl	nucl
THRIPS_11_08_2011_00919	Strong	15	8	7.11282e-59	0.53875	glcm_mouse ame: full=glucosylceramidase ame: full=acid beta-glucosidase ame: full=beta-glucocerebrosidase ame: full=d-glucosyl-n-acylsphingosine glucohydrolase flags: precursor	20	3.64803e-127	0.661	tribolium castaneum o-glycosyl hydrolase family 30 protein mrna	protein	nucl	nucl
THRIPS_11_08_2011_00920	None	0	0			---NA---	0			---NA---	none
THRIPS_11_08_2011_00921	Strong	10	20	0	0.6935	pur2_chick ame: full=trifunctional purine biosynthetic protein adenosine-3 includes: ame: full=phosphoribosylamine--glycine ligase ame: full=glycinamide ribonucleotide synthetase short=gars ame: full=phosphoribosylglycinamide synthetase includes: ame: full=phosphoribosylformylglycinamidine cyclo-ligase ame: full=air synthase short=airs ame: full=phosphoribosyl-aminoimidazole synthetase includes: …	20	0	0.7835	nasonia vitripennis trifunctional purine biosynthetic protein adenosine-3-like mrna	protein	nucl	nucl
THRIPS_11_08_2011_00922	Weak	0	0			---NA---	0			---NA---	none
THRIPS_11_08_2011_00923	Weak	2	3	8.93157e-18	0.563333	ptp1_encin ame: full=polar tube protein 1 ame: full=major polar tube protein short=major ptp flags: precursor	13	1.84602e-14	0.599231	encephalitozoon intestinalis atcc 50506 chromosome complete sequence	uncertain	prot	nucl
THRIPS_11_08_2011_00924	Good	12	20	1.55482e-64	0.894	rs15a_drome ame: full=40s ribosomal protein s15aa	20	3.32113e-90	0.958	drosophila melanogaster ribosomal protein s15aa transcript variant mrna	protein	nucl	nucl
THRIPS_11_08_2011_00925	None	0	0			---NA---	0			---NA---	none
THRIPS_11_08_2011_00926	Strong	14	20	3.28829e-97	0.5445	marh6_human ame: full=e3 ubiquitin-protein ligase march6 ame: full=doa10 homolog ame: full=membrane-associated ring finger protein 6 ame: full=membrane-associated ring-ch protein vi short=march-vi ame: full=protein teb-4 ame: full=ring finger protein 176	20	0	0.8295	bombus terrestris e3 ubiquitin-protein ligase march6-like mrna	protein	nucl	nucl
THRIPS_11_08_2011_00927	Good	18	20	2.12698e-34	0.8435	rs21_bommo ame: full=40s ribosomal protein s21	20	4.98809e-50	0.8875	salmo salar clone ssal-rgg-510-074 40s ribosomal protein s21 complete cds	protein	nucl	nucl
THRIPS_11_08_2011_00928	Weak	0	0			---NA---	0			---NA---	none
THRIPS_11_08_2011_00929	None	0	0			---NA---	0			---NA---	none
THRIPS_11_08_2011_00930	Weak	3	2	8.02057e-07	0.735	leukotriene a-4 hydrolase	6	1.13964e-07	0.706667	tribolium castaneum leukotriene a-4 hydrolase mrna	protein	nucl	prot
THRIPS_11_08_2011_00931	Weak	0	0			---NA---	0			---NA---	none
THRIPS_11_08_2011_00932	Good	7	20	1.44273e-13	0.8	eif3d_anoga ame: full=eukaryotic translation initiation factor 3 subunit d short=eif3d ame: full=eukaryotic translation initiation factor 3 subunit 7	20	2.33375e-18	0.8175	bombus impatiens eukaryotic translation initiation factor 3 subunit d-like mrna	protein	nucl	nucl
THRIPS_11_08_2011_00933	Weak	0	0			---NA---	0			---NA---	none
THRIPS_11_08_2011_00934	Weak	0	0			---NA---	0			---NA---	none
THRIPS_11_08_2011_00935	None	0	0			---NA---	0			---NA---	none
THRIPS_11_08_2011_00936	Weak	0	0			---NA---	0			---NA---	none
THRIPS_11_08_2011_00937	Strong	7	6	5.08139e-46	0.676667	rm19_drome ame: full=39s ribosomal protein mitochondrial short=l19mt short=mrp-l19 flags: precursor	20	5.96891e-57	0.686	culex quinquefasciatus 39s ribosomal protein mrna	protein	nucl	nucl
THRIPS_11_08_2011_00938	Weak	0	0			---NA---	0			---NA---	none
THRIPS_11_08_2011_00939	Good	14	16	2.80394e-26	0.764375	amer1_ponab ame: full=amme syndrome candidate gene 1 protein homolog	20	3.50648e-41	0.8165	bombus impatiens hypothetical loc100747814 miscrna	miscrna	nucl	nucl
THRIPS_11_08_2011_00940	Weak	0	0			---NA---	0			---NA---	none
THRIPS_11_08_2011_00941	Weak	0	0			---NA---	0			---NA---	none
THRIPS_11_08_2011_00942	None	0	0			---NA---	0			---NA---	none
THRIPS_11_08_2011_00943	Weak	0	0			---NA---	0			---NA---	none
THRIPS_11_08_2011_00944	None	0	0			---NA---	0			---NA---	none
THRIPS_11_08_2011_00945	Weak	1	20	5.86867e-37	0.6695	isoform b	20	8.49062e-44	0.8155	drosophila melanogaster pinocchio transcript variant mrna	protein	nucl	nucl
THRIPS_11_08_2011_00946	Strong	10	6	2.11221e-26	0.5	blm_drome ame: full=bloom syndrome protein homolog short=dmblm ame: full=mutagen-sensitive protein 309 ame: full= helicase homolog	20	1.91847e-31	0.7015	acyrthosiphon pisum bloom syndrome protein homolog mrna	protein	nucl	nucl
THRIPS_11_08_2011_00947	Good	3	3	6.37876e-39	0.806667	tim_drome ame: full=protein timeless	20	2.12032e-45	0.8165	drosophila melanogaster timeless transcript variant mrna	protein	nucl	nucl
THRIPS_11_08_2011_00948	Strong	15	11	3.11912e-10	0.583636	dlgp4_human ame: full=disks large-associated protein 4 short=dap-4 ame: full=psd-95 sap90-binding protein 4 ame: full=sap90 psd-95-associated protein 4 short=sapap-4	20	5.30194e-23	0.7045	drosophila melanogaster vulcan transcript variant mrna	protein	nucl	nucl
THRIPS_11_08_2011_00949	Good	32	4	8.7299e-35	0.71	nipbl_mouse ame: full=nipped-b-like protein ame: full=delangin homolog ame: full=scc2 homolog	20	3.60147e-65	0.85	acyrthosiphon pisum nipped-b homolog mrna	protein	nucl	nucl
THRIPS_11_08_2011_00950	None	0	0			---NA---	0			---NA---	none
THRIPS_11_08_2011_00951	Weak	4	9	1.3645e-48	0.614444	ilvbl_danre ame: full=acetolactate synthase-like protein ame: full= -like protein	20	1.60111e-54	0.6965	ciona intestinalis clone: full insert sequence	uncertain	nucl	nucl
THRIPS_11_08_2011_00952	None	35	20	1.87611e-157	0.789	gblp_drome ame: full=guanine nucleotide-binding protein subunit beta-like protein ame: full=receptor of activated protein kinase c homolog	20	0	0.951	blattella germanica receptor for activated protein kinase c-like complete cds	protein	nucl	nucl
THRIPS_11_08_2011_00953	Strong	26	20	1.42432e-89	0.7475	y7597_drome ame: full=cell division cycle 2-like protein kinase cg7597	20	1.41582e-109	0.9315	drosophila melanogaster cg7597 transcript variant mrna	protein	nucl	nucl
THRIPS_11_08_2011_00954	None	0	0			---NA---	0			---NA---	none
THRIPS_11_08_2011_00955	None	0	0			---NA---	0			---NA---	none
THRIPS_11_08_2011_00956	Weak	0	0			---NA---	0			---NA---	none
THRIPS_11_08_2011_00957	Strong	16	20	3.41116e-142	0.723	papss_ureca ame: full=bifunctional 3 -phosphoadenosine 5 -phosphosulfate synthase short=paps synthase short=papss ame: full=sulfurylase kinase short=sk includes: ame: full=sulfate adenylyltransferase ame: full=atp-sulfurylase ame: full=sulfate adenylate transferase short=sat includes: ame: full=adenylyl-sulfate kinase ame: full=3 -phosphoadenosine-5 -phosphosulfate synthase ame: full=aps kinase a…	20	0	0.8575	strongylocentrotus purpuratus paps synthetase mrna	protein	nucl	nucl
THRIPS_11_08_2011_00958	Weak	0	0			---NA---	0			---NA---	none
THRIPS_11_08_2011_00959	Weak	0	0			---NA---	0			---NA---	none
THRIPS_11_08_2011_00960	Good	6	7	1.29056e-153	0.572857	srp68_drome ame: full=signal recognition particle 68 kda protein short=srp68	20	0	0.802	aedes aegypti signal recognition particle 68 kda protein partial mrna	protein	nucl	nucl
THRIPS_11_08_2011_00961	Weak	0	0			---NA---	0			---NA---	none
THRIPS_11_08_2011_00962	Good	17	11	9.33712e-92	0.666364	mgat1_rabit ame: full=alpha- -mannosyl-glycoprotein 2-beta-n-acetylglucosaminyltransferase ame: full=n-glycosyl-oligosaccharide-glycoprotein n-acetylglucosaminyltransferase i short=gnt-i short= c-t i	20	7.62355e-130	0.8825	pediculus humanus corporis alpha- -mannosyl-glycoprotein 2-beta-n- mrna	protein	nucl	nucl
THRIPS_11_08_2011_00963	Weak	7	11	3.31774e-08	0.745455	pre-mrna cleavage complex 2 protein pcf11	20	3.72338e-10	0.7195	nasonia vitripennis pre-mrna cleavage complex ii protein pcf11 -like mrna	protein	nucl	prot
THRIPS_11_08_2011_00964	Weak	0	0			---NA---	0			---NA---	none
THRIPS_11_08_2011_00965	Weak	3	20	0	0.596	osbp1_human ame: full=oxysterol-binding protein 1	20	0	0.84	pediculus humanus corporis oxysterol-binding mrna	protein	nucl	nucl
THRIPS_11_08_2011_00966	Good	8	20	2.39365e-35	0.5005	liph_human ame: full=lipase member h ame: full=lpd lipase-related protein ame: full=membrane-associated phosphatidic acid-selective phospholipase a1-alpha short=mpa-pla1 alpha ame: full=phospholipase a1 member b flags: precursor	20	2.44672e-37	0.6685	nasonia vitripennis pancreatic lipase-related protein 2-like mrna	protein	nucl	nucl
THRIPS_11_08_2011_00967	Strong	1	4	3.51542e-60	0.51	tbcel_mouse ame: full=tubulin-specific chaperone cofactor e-like protein ame: full=leucine-rich repeat-containing protein 35	20	1.69457e-125	0.796	tribolium castaneum tubulin-specific chaperone e mrna	protein	nucl	nucl
THRIPS_11_08_2011_00969	Strong	24	20	0	0.7265	kgp25_drome ame: full=cgmp-dependent protein isozyme 2 forms cd5 t2 short=cgk ame: full=foraging protein	20	0	0.9275	drosophila melanogaster foraging transcript variant mrna	protein	nucl	nucl
THRIPS_11_08_2011_00970	Good	0	0			---NA---	0			---NA---	none
THRIPS_11_08_2011_00971	Good	8	12	0	0.705	vglm_tswv ame: full=envelope glycoprotein short=gp ame: full=m polyprotein contains: ame: full=glycoprotein g1 contains: ame: full=glycoprotein g2 flags: precursor	20	0	0.9825	tomato spotted wilt virus isolate nc-4 segment complete sequence	virus	nucl	nucl
THRIPS_11_08_2011_00972	Strong	22	20	3.67045e-103	0.6295	slk_mouse ame: full=ste20-like serine threonine-protein kinase short=ste20-like kinase short=mslk ame: full=etk4 ame: full=ste20-related kinase smak ame: full=ste20-related serine threonine-protein kinase short=ste20-related kinase ame: full=serine threonine-protein kinase 2	20	0	0.8655	bombus terrestris ste20-like serine threonine-protein kinase- transcript variant 3 mrna	protein	nucl	nucl
THRIPS_11_08_2011_00973	Strong	24	20	0	0.723	kgp25_drome ame: full=cgmp-dependent protein isozyme 2 forms cd5 t2 short=cgk ame: full=foraging protein	20	0	0.925	bombus terrestris cgmp-dependent protein kinase foraging mrna	protein	nucl	nucl
THRIPS_11_08_2011_00974	Strong	22	20	3.47453e-103	0.6295	slk_mouse ame: full=ste20-like serine threonine-protein kinase short=ste20-like kinase short=mslk ame: full=etk4 ame: full=ste20-related kinase smak ame: full=ste20-related serine threonine-protein kinase short=ste20-related kinase ame: full=serine threonine-protein kinase 2	20	0	0.8655	bombus terrestris ste20-like serine threonine-protein kinase- transcript variant 3 mrna	protein	nucl	nucl
THRIPS_11_08_2011_00975	Weak	16	20	0	0.901	vata_anoga ame: full=v-type proton atpase catalytic subunit a short=v-atpase subunit a ame: full=v-atpase 69 kda subunit ame: full=vacuolar proton pump subunit alpha	20	0	0.969	drosophila melanogaster vha68-2 (vha68-2) transcript variant mrna	protein	nucl	nucl
THRIPS_11_08_2011_00976	Weak	75	20	0	0.565	insr_aedae ame: full=insulin-like receptor short=mir contains: ame: full=insulin-like receptor alpha chain contains: ame: full=insulin-like receptor beta chain flags: precursor	20	0	0.848	tribolium castaneum insulin receptor partial mrna	protein	nucl	nucl
THRIPS_11_08_2011_00977	Weak	13	4	8.23515e-97	0.6775	mgat2_mouse ame: full=alpha- -mannosyl-glycoprotein 2-beta-n-acetylglucosaminyltransferase ame: full=beta- -n-acetylglucosaminyltransferase ii ame: full= c-t ii short=gnt-ii ame: full=mannoside acetylglucosaminyltransferase 2 ame: full=n-glycosyl-oligosaccharide-glycoprotein n-acetylglucosaminyltransferase ii	20	0	0.867	drosophila melanogaster mgat2 transcript variant mrna	protein	nucl	nucl
THRIPS_11_08_2011_00978	Good	5	3	4.22998e-56	0.736667	marh6_human ame: full=e3 ubiquitin-protein ligase march6 ame: full=doa10 homolog ame: full=membrane-associated ring finger protein 6 ame: full=membrane-associated ring-ch protein vi short=march-vi ame: full=protein teb-4 ame: full=ring finger protein 176	20	6.94446e-87	0.761	tribolium castaneum ssm4 transcript variant 1 mrna	protein	nucl	nucl
THRIPS_11_08_2011_00979	Good	26	20	4.04884e-179	0.742	vatc_manse ame: full=v-type proton atpase subunit c short=v-atpase subunit c ame: full=vacuolar proton pump subunit c	20	0	0.903	drosophila melanogaster vacuolar h atpase 44kd c subunit transcript variant mrna	protein	nucl	nucl
THRIPS_11_08_2011_00980	Weak	9	8	3.52451e-36	0.5225	lig_drops ame: full=protein lingerer	18	5.36531e-58	0.760556	aedes aegypti lingerer partial mrna	protein	nucl	nucl
THRIPS_11_08_2011_00981	Weak	0	0			---NA---	0			---NA---	none
THRIPS_11_08_2011_00982	Good	2	6	3.25785e-11	0.476667	reverse transcriptase	2	2.74619e-06	0.535	af090145nasonia vitripennis r2 non-ltr retrotransposable element reverse transcriptase partial cds	protein	prot	nucl
THRIPS_11_08_2011_00983	Weak	1	6	1.92928e-21	0.598333	mixed-lineage leukemia mll	6	5.21396e-19	0.806667	nasonia vitripennis trithorax-related mrna	protein	prot	nucl
THRIPS_11_08_2011_00984	Good	4	4	3.21527e-07	0.41	tnr6a_mouse ame: full=trinucleotide repeat-containing gene 6a protein	20	7.34209e-80	0.8425	drosophila melanogaster gawky transcript variant mrna	protein	nucl	nucl
THRIPS_11_08_2011_00985	Good	1	2	1.85797e-52	0.66	anr11_human ame: full=ankyrin repeat domain-containing protein 11 ame: full=ankyrin repeat-containing cofactor 1	20	6.25775e-143	0.8785	pediculus humanus corporis ankyrin repeat-containing mrna	protein	nucl	nucl
THRIPS_11_08_2011_00986	Weak	0	0			---NA---	0			---NA---	none
THRIPS_11_08_2011_00987	Strong	1	1	1.27222e-06	0.73	tbl2_mouse ame: full=transducin beta-like protein 2	20	5.71326e-16	0.75	tribolium castaneum ws beta-transducin repeats protein mrna	protein	nucl	nucl
THRIPS_11_08_2011_00988	None	0	0			---NA---	0			---NA---	none
THRIPS_11_08_2011_00989	Weak	15	20	1.17236e-100	0.78	vatd_manse ame: full=v-type proton atpase subunit d short=v-atpase subunit d ame: full=vacuolar proton pump subunit d	20	2.80234e-121	0.9395	acyrthosiphon pisum vacuolar atpase subunit d transcript variant mrna	protein	nucl	nucl
THRIPS_11_08_2011_00990	Weak	0	0			---NA---	0			---NA---	none
THRIPS_11_08_2011_00991	Strong	4	16	3.79395e-119	0.5875	riok2_mouse ame: full=serine threonine-protein kinase rio2 ame: full=rio kinase 2	20	0	0.905	bombus terrestris serine threonine-protein kinase rio2- transcript variant 2 mrna	protein	nucl	nucl
THRIPS_11_08_2011_00992	Strong	24	20	0	0.6075	al4a1_danre ame: full=delta-1-pyrroline-5-carboxylate mitochondrial short=p5c dehydrogenase ame: full=aldehyde dehydrogenase family 4 member a1 flags: precursor	20	0	0.8135	drosophila melanogaster cg7145 transcript variant mrna	protein	nucl	nucl
THRIPS_11_08_2011_00993	None	0	0			---NA---	0			---NA---	none
THRIPS_11_08_2011_00994	Strong	6	20	2.92226e-132	0.58	ampl_xentr ame: full=cytosol aminopeptidase ame: full=leucine aminopeptidase 3 short=lap-3 ame: full=leucyl aminopeptidase ame: full=proline aminopeptidase ame: full=prolyl aminopeptidase	20	8.37692e-151	0.724	bombus impatiens cytosol aminopeptidase-like mrna	protein	nucl	nucl
THRIPS_11_08_2011_00995	Weak	7	11	2.906e-26	0.704545	med7_anoga ame: full=mediator of rna polymerase ii transcription subunit 7 ame: full=mediator complex subunit 7	20	9.0018e-39	0.847	bombyx mori clone: fner12c11	uncertain	nucl	nucl
THRIPS_11_08_2011_00996	None	0	0			---NA---	0			---NA---	none
THRIPS_11_08_2011_00997	Weak	0	0			---NA---	0			---NA---	none
THRIPS_11_08_2011_00998	Good	15	18	2.49879e-63	0.594444	wasf3_human ame: full=wiskott-aldrich syndrome protein family member 3 short=wasp family protein member 3 ame: full=protein wave-3 ame: full=verprolin homology domain-containing protein 3	20	8.39093e-148	0.8275	tribolium castaneum actin binding mrna	protein	nucl	nucl
THRIPS_11_08_2011_00999	Weak	0	0			---NA---	0			---NA---	none
THRIPS_11_08_2011_01000	Weak	0	0			---NA---	0			---NA---	none
THRIPS_11_08_2011_01001	Strong	13	18	1.22038e-66	0.532778	piwi_drome ame: full=protein piwi	20	7.17726e-95	0.7075	nasonia vitripennis protein piwi-like mrna	protein	nucl	nucl
THRIPS_11_08_2011_01002	Good	14	20	4.41601e-101	0.7005	bcat1_rat ame: full=branched-chain-amino-acid cytosolic short=bcat	20	8.16846e-160	0.877	nasonia vitripennis branched-chain-amino-acid aminotransferase-like mrna	protein	nucl	nucl
THRIPS_11_08_2011_01003	Weak	0	0			---NA---	0			---NA---	none
THRIPS_11_08_2011_01004	None	0	0			---NA---	0			---NA---	none
THRIPS_11_08_2011_01005	None	0	2	6.87025e-24	0.9	art2_yeast ame: full=uncharacterized protein art2 ame: full=antisense to ribosomal rna transcript protein 2	20	1.6186e-179	0.939	aspergillus niger contig genomic contig	uncertain	nucl	nucl
THRIPS_11_08_2011_01006	None	0	0			---NA---	0			---NA---	none
THRIPS_11_08_2011_01007	Strong	14	20	0	0.7985	dhsa_rat ame: full=succinate dehydrogenase flavoprotein mitochondrial ame: full=flavoprotein subunit of complex ii short=fp flags: precursor	20	0	0.932	nasonia vitripennis succinate dehydrogenase subunit flavoprotein nuclear gene encoding mitochondrial mrna	protein	nucl	nucl
THRIPS_11_08_2011_01008	Weak	0	0			---NA---	0			---NA---	none
THRIPS_11_08_2011_01009	Strong	4	0			---NA---	1	8.06073e-06	0.66	tribolium castaneum mannosidase alpha class 2a mrna	protein	nucl only	nucl only
THRIPS_11_08_2011_01010	None	0	0			---NA---	0			---NA---	none
THRIPS_11_08_2011_01011	Weak	0	0			---NA---	0			---NA---	none
THRIPS_11_08_2011_01012	Weak	0	0			---NA---	0			---NA---	none
THRIPS_11_08_2011_01013	Weak	0	0			---NA---	0			---NA---	none
THRIPS_11_08_2011_01014	Strong	11	7	1.04916e-11	0.634286	rm18_mouse ame: full=39s ribosomal protein mitochondrial short=l18mt short=mrp-l18 flags: precursor	20	1.47425e-14	0.6855	strongylocentrotus purpuratus hypothetical loc591926 mrna	protein	nucl	nucl
THRIPS_11_08_2011_01015	Weak	0	0			---NA---	0			---NA---	none
THRIPS_11_08_2011_01016	None	0	0			---NA---	3	6.76591e-07	0.643333	nasonia vitripennis general transcription factor 3c polypeptide 5-like mrna	protein	nucl only	nucl only
THRIPS_11_08_2011_01017	None	0	0			---NA---	0			---NA---	none
THRIPS_11_08_2011_01018	None	0	0			---NA---	0			---NA---	none
THRIPS_11_08_2011_01019	None	0	0			---NA---	0			---NA---	none
THRIPS_11_08_2011_01020	None	0	3	1.7186e-17	0.72	nef attachable protein	20	6.95963e-33	0.79	homo sapiens chromosome clone rp11- complete sequence	uncertain	nucl	nucl
THRIPS_11_08_2011_01022	Weak	0	0			---NA---	0			---NA---	none
THRIPS_11_08_2011_01023	None	0	0			---NA---	0			---NA---	none
THRIPS_11_08_2011_01024	Weak	0	0			---NA---	0			---NA---	none
THRIPS_11_08_2011_01025	Good	0	0			---NA---	0			---NA---	none
THRIPS_11_08_2011_01026	Good	2	2	6.93294e-06	0.55	aldehyde dehydrogenase 16 member a1	0			---NA---	none	prot only	prot only
THRIPS_11_08_2011_01027	Good	2	0			---NA---	0			---NA---	none
THRIPS_11_08_2011_01028	Strong	21	20	5.21918e-35	0.7535	rpb2_drome ame: full=dna-directed rna polymerase ii subunit rpb2 short=rna polymerase ii subunit 2 short=rna polymerase ii subunit b2 ame: full=dna-directed rna polymerase ii 140 kda polypeptide	20	2.04643e-44	0.982	thrips palmi rpb2 mrna for rna polymerase ii second largest partial isolate: e-63	protein	nucl	nucl
THRIPS_11_08_2011_01029	Weak	0	0			---NA---	0			---NA---	none
THRIPS_11_08_2011_01030	Weak	0	0			---NA---	0			---NA---	none
THRIPS_11_08_2011_01031	None	0	0			---NA---	0			---NA---	none
THRIPS_11_08_2011_01032	Strong	4	20	5.61021e-26	0.578	anr28_mouse ame: full=serine threonine-protein phosphatase 6 regulatory ankyrin repeat subunit a short=pp6-ars-a short=serine threonine-protein phosphatase 6 regulatory subunit ars-a ame: full=ankyrin repeat domain-containing protein 28 ame: full=phosphatase interactor targeting protein hnrnp k short=pitk	20	9.93618e-32	0.679	bos taurus serine threonine-protein phosphatase 6 regulatory ankyrin repeat subunit b-like mrna	protein	nucl	nucl
THRIPS_11_08_2011_01033	None	0	0			---NA---	0			---NA---	none
THRIPS_11_08_2011_01034	None	0	0			---NA---	0			---NA---	none
THRIPS_11_08_2011_01035	None	0	0			---NA---	0			---NA---	none
THRIPS_11_08_2011_01036	Weak	0	0			---NA---	0			---NA---	none
THRIPS_11_08_2011_01037	Weak	0	0			---NA---	0			---NA---	none
THRIPS_11_08_2011_01038	Strong	9	5	8.72193e-27	0.852	zrab2_chick ame: full=zinc finger ran-binding domain-containing protein 2	20	6.65229e-37	0.9185	bombus impatiens zinc finger ran-binding domain-containing protein 2-like mrna	protein	nucl	nucl
THRIPS_11_08_2011_01039	Strong	6	6	1.03583e-19	0.63	btkl_drome ame: full=tyrosine-protein kinase btk29a ame: full=dsrc28c ame: full=dsrc29a	20	4.21508e-35	0.921	drosophila melanogaster btk family kinase at 29a transcript variant mrna	protein	nucl	nucl
THRIPS_11_08_2011_01040	Weak	0	0			---NA---	0			---NA---	none
THRIPS_11_08_2011_01041	Weak	0	0			---NA---	0			---NA---	none
THRIPS_11_08_2011_01042	Weak	0	0			---NA---	0			---NA---	none
THRIPS_11_08_2011_01043	None	0	0			---NA---	0			---NA---	none
THRIPS_11_08_2011_01044	Weak	0	0			---NA---	0			---NA---	none
THRIPS_11_08_2011_01045	Strong	4	6	3.33215e-18	0.741667	odc_bovin ame: full=mitochondrial 2-oxodicarboxylate carrier ame: full=solute carrier family 25 member 21	20	3.68965e-27	0.8115	bombyx mori clone: e10024b06	uncertain	nucl	nucl
THRIPS_11_08_2011_01046	None	0	0			---NA---	0			---NA---	none
THRIPS_11_08_2011_01047	None	0	0			---NA---	0			---NA---	none
THRIPS_11_08_2011_01048	Good	26	20	8.17642e-09	0.648	pcna_pea ame: full=proliferating cell nuclear antigen	20	3.07007e-23	0.6965	pisum sativum mrna for proliferating cell nuclear complete cds	protein	nucl	nucl
THRIPS_11_08_2011_01049	None	0	0			---NA---	0			---NA---	none
THRIPS_11_08_2011_01050	Strong	3	6	1.00915e-30	0.835	leng8_danre ame: full=leukocyte receptor cluster member 8 homolog	20	2.56397e-41	0.9325	drosophila melanogaster cg6700 transcript variant mrna	protein	nucl	nucl
THRIPS_11_08_2011_01051	None	0	0			---NA---	0			---NA---	none
THRIPS_11_08_2011_01052	None	0	0			---NA---	0			---NA---	none
THRIPS_11_08_2011_01053	None	0	0			---NA---	0			---NA---	none
THRIPS_11_08_2011_01054	Weak	0	0			---NA---	0			---NA---	none
THRIPS_11_08_2011_01055	None	0	0			---NA---	0			---NA---	none
THRIPS_11_08_2011_01056	None	0	0			---NA---	0			---NA---	none
THRIPS_11_08_2011_01057	None	0	0			---NA---	0			---NA---	none
THRIPS_11_08_2011_01059	None	0	0			---NA---	0			---NA---	none
THRIPS_11_08_2011_01060	None	0	0			---NA---	0			---NA---	none
THRIPS_11_08_2011_01061	None	0	0			---NA---	0			---NA---	none
THRIPS_11_08_2011_01062	None	0	0			---NA---	0			---NA---	none
THRIPS_11_08_2011_01063	None	0	0			---NA---	0			---NA---	none
THRIPS_11_08_2011_01064	Good	18	20	1.44976e-21	0.6275	spg7_mouse ame: full=paraplegin	20	1.81337e-25	0.7	xenopus tropicalis paraplegin-like mrna	protein	nucl	nucl
THRIPS_11_08_2011_01065	Good	2	2	7.06486e-13	0.575	ncoa7_human ame: full=nuclear receptor coactivator 7 ame: full=140 kda estrogen receptor-associated protein ame: full=estrogen nuclear receptor coactivator 1	20	1.59394e-58	0.8325	drosophila melanogaster l 82fd (l 82fd) transcript variant mrna	protein	nucl	nucl
THRIPS_11_08_2011_01066	None	9	20	1.15825e-34	0.8305	tret1_aedae ame: full=facilitated trehalose transporter tret1	20	1.50758e-42	0.838	nilaparvata lugens nlst8 mrna for sugar transporter complete cds	protein	nucl	nucl
THRIPS_11_08_2011_01067	None	0	0			---NA---	0			---NA---	none
THRIPS_11_08_2011_01068	Strong	9	13	6.95851e-32	0.726154	nade1_drome ame: full=probable glutamine-dependent nad(+) synthetase ame: full=nad(+) synthase	20	8.92458e-40	0.8795	drosophila melanogaster cg9940 transcript variant mrna	protein	nucl	nucl
THRIPS_11_08_2011_01069	None	0	0			---NA---	0			---NA---	none
THRIPS_11_08_2011_01070	Strong	83	20	1.23629e-49	0.6975	rhol_drome ame: full=ras-like gtp-binding protein flags: precursor	20	4.96983e-68	0.836	aedes aegypti gtpase_rho partial mrna	protein	nucl	nucl
THRIPS_11_08_2011_01072	Good	4	5	2.43247e-08	0.548	ttc27_chick ame: full=tetratricopeptide repeat protein 27 short=tpr repeat protein 27	20	3.94853e-10	0.564	acyrthosiphon pisum tetratricopeptide repeat protein 27-like mrna	protein	nucl	nucl
THRIPS_11_08_2011_01073	None	0	0			---NA---	0			---NA---	none
THRIPS_11_08_2011_01074	Weak	0	0			---NA---	0			---NA---	none
THRIPS_11_08_2011_01075	Weak	1	3	2.13418e-15	0.726667	leucine-rich and death domain containing-like	2	2.29616e-16	0.84	Branchiostoma floridae hypothetical protein, mRNA	protein	nucl	nucl
THRIPS_11_08_2011_01076	None	0	0			---NA---	0			---NA---	none
THRIPS_11_08_2011_01077	Weak	1	1	2.37161e-06	0.71	kynurenine alpha-aminoadipate aminotransferase mitochondrial	4	3.3681e-07	0.6675	bombus terrestris kynurenine alpha-aminoadipate mitochondrial-like mrna	protein	nucl	prot
THRIPS_11_08_2011_01078	None	0	0			---NA---	0			---NA---	none
THRIPS_11_08_2011_01079	Weak	0	0			---NA---	0			---NA---	none
THRIPS_11_08_2011_01080	Weak	0	0			---NA---	0			---NA---	none
THRIPS_11_08_2011_01081	Weak	0	0			---NA---	0			---NA---	none
THRIPS_11_08_2011_01082	Strong	8	3	4.33263e-10	0.713333	nup50_human ame: full=nuclear pore complex protein nup50 ame: full=50 kda nucleoporin ame: full=nuclear pore-associated protein 60 kda-like ame: full=nucleoporin nup50	14	7.13848e-15	0.781429	culex quinquefasciatus mrna	protein	nucl	nucl
THRIPS_11_08_2011_01083	None	1	2	1.69171e-28	0.805	hypothetical protein Eint_030420 [Encephalitozoon intestinalis ATCC 50506]	4	3.48958e-34	0.805	encephalitozoon intestinalis atcc 50506 chromosome complete sequence	uncertain	nucl	nucl
THRIPS_11_08_2011_01084	None	0	0			---NA---	0			---NA---	none
THRIPS_11_08_2011_01085	None	0	0			---NA---	0			---NA---	none
THRIPS_11_08_2011_01086	Weak	0	0			---NA---	0			---NA---	none
THRIPS_11_08_2011_01087	Weak	0	0			---NA---	0			---NA---	none
THRIPS_11_08_2011_01088	Weak	0	0			---NA---	0			---NA---	none
THRIPS_11_08_2011_01089	None	0	0			---NA---	0			---NA---	none
THRIPS_11_08_2011_01090	None	0	0			---NA---	0			---NA---	none
THRIPS_11_08_2011_01091	Strong	5	7	2.65037e-23	0.634286	tbc25_human ame: full=tbc1 domain family member 25	20	3.25076e-43	0.8285	apis mellifera rab gtpase activating protein transcript variant 2 mrna	protein	nucl	nucl
THRIPS_11_08_2011_01092	None	0	0			---NA---	0			---NA---	none
THRIPS_11_08_2011_01093	Strong	44	20	1.11486e-21	0.8165	rab5c_chick ame: full=ras-related protein rab-5c ame: full=rab5c-like protein	20	2.90395e-42	0.876	enterocytozoon bieneusi h348 gtpase sar1 related small g protein complete cds	protein	nucl	nucl
THRIPS_11_08_2011_01094	Weak	8	20	9.78305e-13	0.757	nadh-ubiquinone oxidoreductase subunit	20	4.5393e-14	0.7805	drosophila melanogaster cg3214 transcript variant mrna	protein	nucl	nucl
THRIPS_11_08_2011_01095	Weak	0	0			---NA---	0			---NA---	none
THRIPS_11_08_2011_01096	Weak	0	0			---NA---	0			---NA---	none
THRIPS_11_08_2011_01097	Weak	0	0			---NA---	0			---NA---	none
THRIPS_11_08_2011_01098	Good	19	20	9.75513e-49	0.6775	at8b4_human ame: full=probable phospholipid-transporting atpase im ame: full=atpase class i type 8b member 4	20	4.2148e-77	0.8925	bombus terrestris probable phospholipid-transporting atpase id-like mrna	protein	nucl	nucl
THRIPS_11_08_2011_01099	None	0	0			---NA---	0			---NA---	none
THRIPS_11_08_2011_01100	Weak	0	0			---NA---	0			---NA---	none
THRIPS_11_08_2011_01101	Strong	13	20	8.11479e-63	0.7495	catl1_chick ame: full=cathepsin l1 contains: ame: full=cathepsin l1 heavy chain contains: ame: full=cathepsin l1 light chain	20	3.82459e-92	0.7965	frankliniella occidentalis cysteine protease cp19 complete cds	protein	nucl	nucl
THRIPS_11_08_2011_01102	Good	1	4	3.52728e-12	0.79	mfap1_bovin ame: full=microfibrillar-associated protein 1	20	2.10307e-19	0.8355	strongylocentrotus purpuratus ensangp00000028298 mrna	protein	nucl	nucl
THRIPS_11_08_2011_01103	Weak	0	0			---NA---	0			---NA---	none
THRIPS_11_08_2011_01104	Strong	11	10	8.7987e-11	0.665	xdh_drosu ame: full=xanthine dehydrogenase short=xd ame: full=protein rosy locus	20	6.45539e-15	0.794	nasonia vitripennis xanthine dehydrogenase-like mrna	protein	nucl	nucl
THRIPS_11_08_2011_01105	None	0	0			---NA---	0			---NA---	none
THRIPS_11_08_2011_01106	None	0	0			---NA---	0			---NA---	none
THRIPS_11_08_2011_01107	Strong	20	20	1.10096e-37	0.568	sdk_drome ame: full=protein sidekick flags: precursor	20	2.73983e-47	0.8375	drosophila melanogaster sidekick transcript variant mrna	protein	nucl	nucl
THRIPS_11_08_2011_01108	Strong	15	20	7.89634e-28	0.8085	yme1_caeel ame: full=atp-dependent zinc metalloprotease yme1 homolog	20	3.76331e-32	0.852	drosophila miranda partial ga17483 strain	uncertain	nucl	nucl
THRIPS_11_08_2011_01109	Weak	5	14	7.8116e-56	0.515	endou_drome ame: full=poly -specific endoribonuclease homolog ame: full=protein endou ame: full=uridylate-specific endoribonuclease homolog flags: precursor	20	7.92289e-61	0.661	drosophila pseudoobscura pseudoobscura ga15266 (dpse\ga15266) mrna	protein	nucl	nucl
THRIPS_11_08_2011_01110	None	0	0			---NA---	0			---NA---	none
THRIPS_11_08_2011_01111	None	0	0			---NA---	0			---NA---	none
THRIPS_11_08_2011_01112	None	0	0			---NA---	1	5.00413e-10	0.71	phakopsora pachyrhizi clone jgiafna- complete sequence	uncertain	nucl only	nucl only
THRIPS_11_08_2011_01113	None	0	0			---NA---	1	1.43642e-13	0.65	phakopsora pachyrhizi clone jgiafna- complete sequence	uncertain	nucl only	nucl only
THRIPS_11_08_2011_01114	None	0	0			---NA---	1	1.02086e-13	0.65	phakopsora pachyrhizi clone jgiafna- complete sequence	uncertain	nucl only	nucl only
THRIPS_11_08_2011_01115	Weak	0	0			---NA---	0			---NA---	none
THRIPS_11_08_2011_01116	None	0	0			---NA---	0			---NA---	none
THRIPS_11_08_2011_01117	Weak	0	0			---NA---	0			---NA---	none
THRIPS_11_08_2011_01118	None	0	0			---NA---	0			---NA---	none
THRIPS_11_08_2011_01119	None	0	0			---NA---	0			---NA---	none
THRIPS_11_08_2011_01120	Strong	8	19	0	0.476842	ipo7_mouse ame: full=importin-7 short=imp7 ame: full=ran-binding protein 7 short= 7	20	0	0.7915	tribolium castaneum importin-7 mrna	protein	nucl	nucl
THRIPS_11_08_2011_01121	Strong	8	19	0	0.477368	ipo7_mouse ame: full=importin-7 short=imp7 ame: full=ran-binding protein 7 short= 7	20	0	0.7915	tribolium castaneum importin-7 mrna	protein	nucl	nucl
THRIPS_11_08_2011_01122	Weak	0	2	1.18494e-06	0.63	awa1_yeast ame: full=cell wall protein awa1 flags: precursor	0			---NA---	none	prot only	prot only
THRIPS_11_08_2011_01123	None	6	3	2.12599e-06	0.446667	PREDICTED: hypothetical protein [Danio rerio]	20	3.96565e-08	0.454	variovorax paradoxus s110 chromosome complete sequence	uncertain	nucl	nucl
THRIPS_11_08_2011_01124	Weak	0	0			---NA---	0			---NA---	none
THRIPS_11_08_2011_01125	Weak	0	0			---NA---	0			---NA---	none
THRIPS_11_08_2011_01126	Weak	1	7	6.74712e-09	0.471429	venom carbohydrate-rich protein	1	6.88052e-07	0.64	Pediculus humanus corporis conserved hypothetical protein, mRNA	protein	prot	nucl
THRIPS_11_08_2011_01127	Weak	1	7	1.37202e-08	0.471429	venom carbohydrate-rich protein	1	7.64879e-07	0.64	Pediculus humanus corporis conserved hypothetical protein, mRNA	protein	prot	nucl
THRIPS_11_08_2011_01128	None	0	0			---NA---	0			---NA---	none
THRIPS_11_08_2011_01129	Good	3	4	6.96067e-24	0.4525	renr_bovin ame: full=renin receptor ame: full=atpase h(+)-transporting lysosomal accessory protein 2 ame: full=atpase h(+)-transporting lysosomal-interacting protein 2 ame: full=renin prorenin receptor ame: full=vacuolar atp synthase membrane sector-associated protein m8-9 short=v-atpase subunit flags: precursor	20	1.82431e-67	0.78	bombus impatiens renin receptor- transcript variant 1 mrna	protein	nucl	nucl
THRIPS_11_08_2011_01130	Good	3	4	1.3759e-23	0.4525	renr_bovin ame: full=renin receptor ame: full=atpase h(+)-transporting lysosomal accessory protein 2 ame: full=atpase h(+)-transporting lysosomal-interacting protein 2 ame: full=renin prorenin receptor ame: full=vacuolar atp synthase membrane sector-associated protein m8-9 short=v-atpase subunit flags: precursor	20	1.44549e-68	0.79	bombus impatiens renin receptor- transcript variant 1 mrna	protein	nucl	nucl
THRIPS_11_08_2011_01131	None	8	4	9.13319e-08	0.7	renr_bovin ame: full=renin receptor ame: full=atpase h(+)-transporting lysosomal accessory protein 2 ame: full=atpase h(+)-transporting lysosomal-interacting protein 2 ame: full=renin prorenin receptor ame: full=vacuolar atp synthase membrane sector-associated protein m8-9 short=v-atpase subunit flags: precursor	20	1.8051e-23	0.837	anopheles gambiae pest agap003430-pa complete cds	protein	nucl	nucl
THRIPS_11_08_2011_01132	Weak	0	0			---NA---	0			---NA---	none
THRIPS_11_08_2011_01133	Weak	0	0			---NA---	0			---NA---	none
THRIPS_11_08_2011_01134	Strong	12	20	2.81301e-12	0.653	keap1_mouse ame: full=kelch-like ech-associated protein 1 ame: full=cytosolic inhibitor of nrf2 short=inrf2	20	1.97955e-33	0.845	apis mellifera kelch-like ech-associated protein 1-like mrna	protein	nucl	nucl
THRIPS_11_08_2011_01135	Strong	29	20	1.111e-170	0.6	keap1_pig ame: full=kelch-like ech-associated protein 1 ame: full=cytosolic inhibitor of nrf2 short=inrf2	20	0	0.842	bombus terrestris kelch-like ech-associated protein 1-like mrna	protein	nucl	nucl
THRIPS_11_08_2011_01136	Weak	10	20	0	0.523	spt6h_drome ame: full=transcription elongation factor spt6	20	0	0.8415	apis mellifera transcription elongation factor spt6-like miscrna	protein	nucl	nucl
THRIPS_11_08_2011_01137	Strong	9	20	0	0.512	spt6h_drome ame: full=transcription elongation factor spt6	20	0	0.786	bombus impatiens transcription elongation factor spt6-like mrna	protein	nucl	nucl
THRIPS_11_08_2011_01138	Weak	0	0			---NA---	0			---NA---	none
THRIPS_11_08_2011_01139	Weak	0	0			---NA---	0			---NA---	none
THRIPS_11_08_2011_01140	None	0	0			---NA---	0			---NA---	none
THRIPS_11_08_2011_01141	None	0	0			---NA---	0			---NA---	none
THRIPS_11_08_2011_01142	None	0	0			---NA---	0			---NA---	none
THRIPS_11_08_2011_01143	Strong	13	20	6.08415e-65	0.447	perc_drome ame: full=chorion peroxidase ame: full=peroxinectin-related protein short=dpxt contains: ame: full=chorion peroxidase light chain contains: ame: full=chorion peroxidase heavy chain flags: precursor	20	2.68609e-74	0.634	acyrthosiphon pisum peroxidase-like mrna	protein	nucl	nucl
THRIPS_11_08_2011_01144	Strong	13	20	2.64528e-78	0.4685	pero_drome ame: full=peroxidase short= ame: full=chorion peroxidase flags: precursor	20	5.50379e-81	0.606	drosophila melanogaster peroxidase transcript variant mrna	protein	nucl	nucl
THRIPS_11_08_2011_01145	Strong	51	20	3.24964e-44	0.97	ubiqp_strpu ame: full=polyubiquitin contains: ame: full=ubiquitin flags: precursor	20	1.01306e-52	0.933	tetraodon nigroviridis full-length cdna	cDNA	nucl	prot
THRIPS_11_08_2011_01146	Weak	0	19	6.79681e-43	0.727368	hypothetical protein [Curvibacter putative symbiont of Hydra magnipapillata]	20	2.89946e-79	0.874	alicycliphilus denitrificans complete genome	uncertain	nucl	nucl
THRIPS_11_08_2011_01147	Weak	0	14	2.28859e-09	0.611429	hypothetical protein SCH_0249 [Salmonella enterica subsp. enterica serovar Choleraesuis str. SC-B67]	20	1.04855e-33	0.866	alicycliphilus denitrificans complete genome	uncertain	nucl	nucl
THRIPS_11_08_2011_01148	None	0	0			---NA---	0			---NA---	none
THRIPS_11_08_2011_01149	Weak	0	0			---NA---	0			---NA---	none
THRIPS_11_08_2011_01150	Weak	0	0			---NA---	0			---NA---	none
THRIPS_11_08_2011_01151	Strong	81	20	0	0.7295	fur1c_drome ame: full=furin-like protease isoform 1-crr short=furin-1 ame: full=kex2-like endoprotease 1 ame: full=dklip-1 flags: precursor	20	0	0.8555	drosophila melanogaster furin 1 transcript variant mrna	protein	nucl	nucl
THRIPS_11_08_2011_01152	Strong	81	20	0	0.729	fur1c_drome ame: full=furin-like protease isoform 1-crr short=furin-1 ame: full=kex2-like endoprotease 1 ame: full=dklip-1 flags: precursor	20	0	0.858	drosophila melanogaster furin 1 transcript variant mrna	protein	nucl	nucl
THRIPS_11_08_2011_01153	Strong	80	20	0	0.719	fur1c_drome ame: full=furin-like protease isoform 1-crr short=furin-1 ame: full=kex2-like endoprotease 1 ame: full=dklip-1 flags: precursor	20	0	0.8555	drosophila melanogaster furin 1 transcript variant mrna	protein	nucl	nucl
THRIPS_11_08_2011_01154	Strong	75	20	0	0.6775	fur1c_drome ame: full=furin-like protease isoform 1-crr short=furin-1 ame: full=kex2-like endoprotease 1 ame: full=dklip-1 flags: precursor	20	0	0.858	drosophila melanogaster furin 1 transcript variant mrna	protein	nucl	nucl
THRIPS_11_08_2011_01156	Weak	0	0			---NA---	0			---NA---	none
THRIPS_11_08_2011_01157	None	0	0			---NA---	0			---NA---	none
THRIPS_11_08_2011_01158	Strong	2	9	2.56218e-36	0.48	vit_antgr ame: full=vitellogenin contains: ame: full=yp47 contains: ame: full=yp160 flags: precursor	20	4.56826e-76	0.625	culex quinquefasciatus vitellogenin- mrna	protein	nucl	nucl
THRIPS_11_08_2011_01159	None	0	0			---NA---	0			---NA---	none
THRIPS_11_08_2011_01160	Weak	0	0			---NA---	0			---NA---	none
THRIPS_11_08_2011_01161	Weak	0	0			---NA---	0			---NA---	none
THRIPS_11_08_2011_01162	Weak	0	0			---NA---	0			---NA---	none
THRIPS_11_08_2011_01163	Weak	0	0			---NA---	0			---NA---	none
THRIPS_11_08_2011_01164	Strong	20	20	6.59255e-149	0.568	kalrn_human ame: full=kalirin ame: full=huntingtin-associated protein-interacting protein ame: full=protein duo ame: full=serine threonine-protein kinase with dbl- and pleckstrin homology domain	20	0	0.855	tribolium castaneum agap006107-pb mrna	protein	nucl	nucl
THRIPS_11_08_2011_01165	Strong	15	20	1.07391e-121	0.547	kalrn_human ame: full=kalirin ame: full=huntingtin-associated protein-interacting protein ame: full=protein duo ame: full=serine threonine-protein kinase with dbl- and pleckstrin homology domain	20	0	0.86	tribolium castaneum agap006107-pb mrna	protein	nucl	nucl
THRIPS_11_08_2011_01166	Weak	11	20	9.27469e-96	0.488	ddx6l_human ame: full=probable atp-dependent rna helicase ddx60-like ame: full=dead box protein 60-like	20	1.81721e-157	0.7235	monodelphis domestica probable atp-dependent rna helicase ddx60-like mrna	protein	nucl	nucl
THRIPS_11_08_2011_01167	Strong	8	20	1.02367e-62	0.51	s2611_human ame: full=sodium-independent sulfate anion transporter ame: full=solute carrier family 26 member 11	20	9.4412e-158	0.7705	bombus impatiens sodium-independent sulfate anion transporter-like mrna	protein	nucl	nucl
THRIPS_11_08_2011_01168	Strong	8	20	4.77158e-119	0.504	s2611_mouse ame: full=sodium-independent sulfate anion transporter ame: full=solute carrier family 26 member 11	20	0	0.761	pediculus humanus corporis sulfate mrna	protein	nucl	nucl
THRIPS_11_08_2011_01169	None	0	0			---NA---	0			---NA---	none
THRIPS_11_08_2011_01170	Weak	0	0			---NA---	0			---NA---	none
THRIPS_11_08_2011_01171	None	1	3	5.04334e-06	0.583333	brox_human ame: full=bro1 domain-containing protein brox flags: precursor	7	1.42735e-10	0.602857	ixodes scapularis bro1 domain-containing protein mrna	protein	nucl	nucl
THRIPS_11_08_2011_01172	Weak	0	0			---NA---	0			---NA---	none
THRIPS_11_08_2011_01173	None	0	0			---NA---	0			---NA---	none
THRIPS_11_08_2011_01174	Good	4	20	5.96853e-31	0.626	atp6_locmi ame: full=atp synthase subunit a ame: full=f-atpase protein 6	20	8.8887e-81	0.7045	litopenaeus vannamei complete genome	uncertain	nucl	nucl
THRIPS_11_08_2011_01175	None	0	0			---NA---	0			---NA---	none
THRIPS_11_08_2011_01176	Good	4	20	6.12578e-138	0.865	eif3d_bommo ame: full=eukaryotic translation initiation factor 3 subunit d short=eif3d ame: full=eukaryotic translation initiation factor 3 subunit 7	20	0	0.916	drosophila melanogaster chromosome complete sequence	uncertain	nucl	nucl
THRIPS_11_08_2011_01177	Good	7	20	0	0.8105	eif3d_culqu ame: full=eukaryotic translation initiation factor 3 subunit d short=eif3d ame: full=eukaryotic translation initiation factor 3 subunit 7	20	0	0.922	bombus terrestris eukaryotic translation initiation factor 3 subunit d-like mrna	protein	nucl	nucl
THRIPS_11_08_2011_01178	Good	7	20	0	0.8005	eif3d_anoga ame: full=eukaryotic translation initiation factor 3 subunit d short=eif3d ame: full=eukaryotic translation initiation factor 3 subunit 7	20	0	0.922	bombus terrestris eukaryotic translation initiation factor 3 subunit d-like mrna	protein	nucl	nucl
THRIPS_11_08_2011_01179	None	0	0			---NA---	1	1.83955e-24	0.77	phakopsora pachyrhizi clone jgiafna- complete sequence	uncertain	nucl only	nucl only
THRIPS_11_08_2011_01180	None	0	0			---NA---	1	1.53174e-21	0.78	phakopsora pachyrhizi clone jgiafna- complete sequence	uncertain	nucl only	nucl only
THRIPS_11_08_2011_01181	None	0	0			---NA---	1	2.82673e-07	0.61	phakopsora pachyrhizi clone jgiafna- complete sequence	uncertain	nucl only	nucl only
THRIPS_11_08_2011_01182	Strong	22	20	6.3069e-109	0.612	cbpd_drome ame: full=carboxypeptidase d ame: full=metallocarboxypeptidase d ame: full=protein silver flags: precursor	20	1.79782e-135	0.7555	drosophila melanogaster silver transcript variant mrna	protein	nucl	nucl
THRIPS_11_08_2011_01183	Strong	27	20	0	0.6665	cbpd_drome ame: full=carboxypeptidase d ame: full=metallocarboxypeptidase d ame: full=protein silver flags: precursor	20	0	0.759	drosophila melanogaster silver transcript variant mrna	protein	nucl	nucl
THRIPS_11_08_2011_01184	None	0	20	2.44916e-38	0.8215	protein	20	0	0.982	mucuna pruriens 18s ribosomal rna complete sequence	rRNA	nucl	nucl
THRIPS_11_08_2011_01185	Weak	0	0			---NA---	0			---NA---	none
THRIPS_11_08_2011_01186	Strong	6	1	2.7572e-27	0.45	ymd2_caeel ame: full=uncharacterized protein	20	3.75932e-115	0.649	strongylocentrotus purpuratus hypothetical loc594739 mrna	protein	nucl	nucl
THRIPS_11_08_2011_01187	Weak	0	0			---NA---	0			---NA---	none
THRIPS_11_08_2011_01188	Weak	0	0			---NA---	0			---NA---	none
THRIPS_11_08_2011_01189	Weak	0	0			---NA---	0			---NA---	none
THRIPS_11_08_2011_01190	Weak	0	0			---NA---	0			---NA---	none
THRIPS_11_08_2011_01191	None	7	20	3.60535e-102	0.601	cpr1_drome ame: full= cysteine proteinase cg12163 flags: precursor	20	4.04415e-171	0.805	plautia stali mrna for cathepsin f-like cysteine complete cds	protein	nucl	nucl
THRIPS_11_08_2011_01192	Weak	7	20	7.91695e-101	0.6015	cpr1_drome ame: full= cysteine proteinase cg12163 flags: precursor	20	9.95115e-173	0.8035	plautia stali mrna for cathepsin f-like cysteine complete cds	protein	nucl	nucl
THRIPS_11_08_2011_01193	Weak	0	0			---NA---	0			---NA---	none
THRIPS_11_08_2011_01194	Weak	0	0			---NA---	0			---NA---	none
THRIPS_11_08_2011_01195	None	0	0			---NA---	0			---NA---	none
THRIPS_11_08_2011_01196	None	0	0			---NA---	0			---NA---	none
THRIPS_11_08_2011_01197	None	0	0			---NA---	0			---NA---	none
THRIPS_11_08_2011_01198	Weak	0	0			---NA---	0			---NA---	none
THRIPS_11_08_2011_01199	None	0	0			---NA---	0			---NA---	none
THRIPS_11_08_2011_01200	None	0	0			---NA---	0			---NA---	none
THRIPS_11_08_2011_01201	None	0	0			---NA---	0			---NA---	none
THRIPS_11_08_2011_01202	None	0	0			---NA---	0			---NA---	none
THRIPS_11_08_2011_01203	Good	4	3	1.90687e-26	0.516667	znfx1_human ame: full=nfx1-type zinc finger-containing protein 1	20	1.05971e-35	0.717	strongylocentrotus purpuratus kiaa1404 protein mrna	protein	nucl	nucl
THRIPS_11_08_2011_01204	Strong	17	20	0	0.7515	mmsa_anoga ame: full=probable methylmalonate-semialdehyde dehydrogenase flags: precursor	20	0	0.8525	drosophila melanogaster cg17896 transcript variant mrna	protein	nucl	nucl
THRIPS_11_08_2011_01205	Good	10	20	3.5773e-36	0.639	p5cr2_bovin ame: full=pyrroline-5-carboxylate reductase 2 short=p5c reductase 2 short=p5cr 2	20	1.30126e-58	0.6885	aedes aegypti pyrroline-5-carboxylate reductase partial mrna	protein	nucl	nucl
THRIPS_11_08_2011_01206	None	0	0			---NA---	0			---NA---	none
THRIPS_11_08_2011_01207	Weak	0	0			---NA---	0			---NA---	none
THRIPS_11_08_2011_01208	Weak	0	0			---NA---	0			---NA---	none
THRIPS_11_08_2011_01209	Weak	0	0			---NA---	0			---NA---	none
THRIPS_11_08_2011_01210	Weak	0	0			---NA---	0			---NA---	none
THRIPS_11_08_2011_01211	None	0	0			---NA---	0			---NA---	none
THRIPS_11_08_2011_01212	Weak	0	0			---NA---	0			---NA---	none
THRIPS_11_08_2011_01213	None	0	0			---NA---	0			---NA---	none
THRIPS_11_08_2011_01214	Good	0	3	4.13857e-08	0.61	pol3_drome ame: full=retrovirus-related pol polyprotein from transposon includes: ame: full=protease includes: ame: full=reverse transcriptase includes: ame: full=endonuclease	20	1.78564e-13	0.6715	vitis vinifera contig whole genome shotgun sequence	uncertain	nucl	nucl
THRIPS_11_08_2011_01215	Weak	37	20	0	0.777	dldh_human ame: full=dihydrolipoyl mitochondrial ame: full=dihydrolipoamide dehydrogenase ame: full=glycine cleavage system l protein flags: precursor	20	0	0.868	acyrthosiphon pisum dihydrolipoyl mitochondrial-like mrna	protein	nucl	nucl
THRIPS_11_08_2011_01216	None	37	20	0	0.7755	dldh_human ame: full=dihydrolipoyl mitochondrial ame: full=dihydrolipoamide dehydrogenase ame: full=glycine cleavage system l protein flags: precursor	20	0	0.8795	acyrthosiphon pisum dihydrolipoyl mitochondrial-like mrna	protein	nucl	nucl
THRIPS_11_08_2011_01217	None	0	0			---NA---	0			---NA---	none
THRIPS_11_08_2011_01218	Weak	6	1	5.16567e-06	0.48	wnk3_human ame: full=serine threonine-protein kinase wnk3 ame: full=protein kinase lysine-deficient 3 ame: full=protein kinase with no lysine 3	18	2.71854e-35	0.724444	pediculus humanus corporis serine threonine-protein kinase wnk mrna	protein	nucl	nucl
THRIPS_11_08_2011_01219	Weak	0	0			---NA---	18	2.38319e-09	0.552222	mus musculus chromosome clone rp23- complete sequence	uncertain	nucl only	nucl only
THRIPS_11_08_2011_01220	Weak	0	0			---NA---	0			---NA---	none
THRIPS_11_08_2011_01221	Weak	0	0			---NA---	0			---NA---	none
THRIPS_11_08_2011_01222	None	0	0			---NA---	0			---NA---	none
THRIPS_11_08_2011_01223	Weak	0	0			---NA---	0			---NA---	none
THRIPS_11_08_2011_01224	Good	0	0			---NA---	20	2.02688e-06	0.835	trichinella spiralis zinc finger protein complete cds	protein	nucl only	nucl only
THRIPS_11_08_2011_01225	Strong	35	20	0	0.639	myo9a_rat ame: full=myosin-ixa ame: full=myr 7 ame: full=unconventional myosin-9a	20	0	0.872	acyrthosiphon pisum myosin transcript variant 2 mrna	protein	nucl	nucl
THRIPS_11_08_2011_01226	Weak	0	0			---NA---	0			---NA---	none
THRIPS_11_08_2011_01227	Strong	10	8	2.34426e-101	0.60375	ank2_human ame: full=ankyrin-2 short=ank-2 ame: full=ankyrin-b ame: full=brain ankyrin ame: full=non-erythroid ankyrin	20	0	0.894	drosophila melanogaster ankyrin 2 transcript variant mrna	protein	nucl	nucl
THRIPS_11_08_2011_01228	None	6	4	7.81374e-46	0.6125	s35c2_mouse ame: full=solute carrier family 35 member c2 ame: full=ovarian cancer-overexpressed gene 1 protein	20	2.29093e-79	0.6825	aedes aegypti solute carrier family 35 member c2 partial mrna	protein	nucl	nucl
THRIPS_11_08_2011_01229	Weak	10	5	1.50577e-12	0.904	rl39_pluxy ame: full=60s ribosomal protein l39	20	2.3204e-16	0.929	single read from an extremity of a cdna clone made from aedes aegypti total adult 3-prime end of clone kw0aab2yg08bbm1 from strain liverpool of aedes aegypti (yellow fever mosquito)	cDNA	nucl	nucl
THRIPS_11_08_2011_01230	None	0	0			---NA---	0			---NA---	none
THRIPS_11_08_2011_01231	Weak	0	0			---NA---	0			---NA---	none
THRIPS_11_08_2011_01232	Good	43	20	1.92107e-84	0.813	rala_drome ame: full=ras-related protein ral-a flags: precursor	20	9.89998e-107	0.903	drosophila melanogaster ras-related protein transcript variant mrna	protein	nucl	nucl
THRIPS_11_08_2011_01233	Strong	53	20	0	0.59	mys9_drome ame: full=myosin heavy chain 95f ame: full=95f mhc ame: full=protein jaguar	20	0	0.8165	drosophila melanogaster jaguar transcript variant mrna	protein	nucl	nucl
THRIPS_11_08_2011_01234	None	7	20	2.48291e-110	0.6865	spsb1_bovin ame: full=spry domain-containing socs box protein 1 short=ssb-1	20	2.09355e-166	0.9	pediculus humanus corporis spry domain-containing socs box mrna	protein	nucl	nucl
THRIPS_11_08_2011_01235	Strong	22	20	4.20137e-140	0.548	c43bp_crigr ame: full=collagen type iv alpha-3-binding protein ame: full=ceramide transfer protein	20	0	0.7535	apis mellifera collagen type iv alpha-3-binding transcript variant 1 mrna	protein	nucl	nucl
THRIPS_11_08_2011_01236	Weak	0	0			---NA---	0			---NA---	none
THRIPS_11_08_2011_01237	None	0	0			---NA---	1	9.66086e-49	0.97	phakopsora pachyrhizi clone jgiafna- complete sequence	uncertain	nucl only	nucl only
THRIPS_11_08_2011_01238	None	0	0			---NA---	0			---NA---	none
THRIPS_11_08_2011_01239	None	0	0			---NA---	0			---NA---	none
THRIPS_11_08_2011_01240	Weak	0	0			---NA---	0			---NA---	none
THRIPS_11_08_2011_01241	Weak	12	20	1.69333e-51	0.611	rhg21_xentr ame: full=rho gtpase-activating protein 21 ame: full=rho-type gtpase-activating protein 21	20	2.5459e-141	0.8165	tribolium castaneum rho gtpase activating protein 21 mrna	protein	nucl	nucl
THRIPS_11_08_2011_01242	Weak	0	0			---NA---	0			---NA---	none
THRIPS_11_08_2011_01243	Strong	1	2	2.10327e-07	0.68	26s proteasome regulatory complex protein	5	1.63786e-09	0.676	encephalitozoon intestinalis atcc 50506 26s proteasome regulatory complex protein complete cds	protein	nucl	prot
THRIPS_11_08_2011_01244	Strong	16	20	1.86363e-165	0.768	ddx17_mouse ame: full=probable atp-dependent rna helicase ddx17 ame: full=dead box protein 17	20	0	0.8655	bombus terrestris probable atp-dependent rna helicase ddx17-like mrna	protein	nucl	nucl
THRIPS_11_08_2011_01245	Strong	16	20	1.83893e-165	0.768	ddx17_mouse ame: full=probable atp-dependent rna helicase ddx17 ame: full=dead box protein 17	20	0	0.8655	bombus terrestris probable atp-dependent rna helicase ddx17-like mrna	protein	nucl	nucl
THRIPS_11_08_2011_01246	Good	7	4	1.28048e-17	0.57	trm44_mouse ame: full=probable trna (uracil-o -)-methyltransferase	20	1.64884e-29	0.668	bombus terrestris probable trna (uracil-o -)-methyltransferase-like mrna	protein	nucl	nucl
THRIPS_11_08_2011_01247	None	0	0			---NA---	0			---NA---	none
THRIPS_11_08_2011_01248	Weak	0	0			---NA---	0			---NA---	none
THRIPS_11_08_2011_01249	Strong	5	10	8.42674e-130	0.681	s41a1_ponab ame: full=solute carrier family 41 member 1	20	0	0.812	bombus terrestris solute carrier family 41 member 1-like mrna	protein	nucl	nucl
THRIPS_11_08_2011_01250	Strong	5	11	1.64797e-17	0.625455	lypl1_ponab ame: full=lysophospholipase-like protein 1	20	4.67121e-22	0.7455	anolis carolinensis lysophospholipase-like protein 1-like mrna	protein	nucl	nucl
THRIPS_11_08_2011_01251	Weak	0	0			---NA---	0			---NA---	none
THRIPS_11_08_2011_01252	Weak	0	0			---NA---	0			---NA---	none
THRIPS_11_08_2011_01253	Good	11	20	0	0.761	sahh3_mouse ame: full= adenosylhomocysteinase 3 short= cyase 3 ame: full=s-adenosyl-l-homocysteine hydrolase 3 ame: full=s-adenosylhomocysteine hydrolase-like protein 2	20	0	0.9585	bombus terrestris adenosylhomocysteinase 3- transcript variant 2 mrna	protein	nucl	nucl
THRIPS_11_08_2011_01254	None	0	0			---NA---	0			---NA---	none
THRIPS_11_08_2011_01255	Good	13	20	2.31953e-32	0.4925	lipe_mouse ame: full=endothelial lipase ame: full=endothelial cell-derived lipase short=edl flags: precursor	20	2.78483e-42	0.6355	aedes aegypti lipase partial mrna	protein	nucl	nucl
THRIPS_11_08_2011_01256	None	1	12	1.60174e-63	0.605	k1370_xentr ame: full=uncharacterized protein kiaa1370 homolog	20	1.91599e-143	0.7375	mus musculus cdna sequence bc031353 transcript variant mrna	protein	nucl	nucl
THRIPS_11_08_2011_01257	Strong	18	20	0	0.6215	rent1_human ame: full=regulator of nonsense transcripts 1 ame: full=atp-dependent helicase rent1 ame: full=nonsense mrna reducing factor 1 short=norf1 ame: full=up-frameshift suppressor 1 homolog short=hupf1	20	0	0.9035	nasonia vitripennis regulator of nonsense transcripts 1- transcript variant 3 mrna	protein	nucl	nucl
THRIPS_11_08_2011_01258	None	0	0			---NA---	1	8.06979e-06	0.82	bombyx mori clone: fwd-28p17	uncertain	nucl only	nucl only
THRIPS_11_08_2011_01259	None	14	11	2.25179e-13	0.504545	dicer_xentr ame: full=endoribonuclease dicer	20	5.14784e-15	0.577	homo sapiens dicer ribonuclease type iii transcript variant mrna	protein	nucl	nucl
THRIPS_11_08_2011_01260	None	0	0			---NA---	0			---NA---	none
THRIPS_11_08_2011_01261	Weak	0	0			---NA---	0			---NA---	none
THRIPS_11_08_2011_01262	Weak	0	0			---NA---	0			---NA---	none
THRIPS_11_08_2011_01263	Weak	0	0			---NA---	0			---NA---	none
THRIPS_11_08_2011_01264	Strong	15	20	8.87308e-11	0.563	ak1cd_mouse ame: full=aldo-keto reductase family 1 member c13	20	4.10403e-21	0.7025	anopheles gambiae pest agap003408-pa complete cds	protein	nucl	nucl
THRIPS_11_08_2011_01265	Weak	0	0			---NA---	0			---NA---	none
THRIPS_11_08_2011_01266	None	0	0			---NA---	0			---NA---	none
THRIPS_11_08_2011_01267	Good	3	4	1.51348e-74	0.5475	itfg2_mouse ame: full=integrin-alpha fg-gap repeat-containing protein 2	20	5.34246e-127	0.752	apis mellifera hypothetical transcript variant 2 mrna	protein	nucl	nucl
THRIPS_11_08_2011_01268	Weak	0	1	8.45582e-06	0.47	GJ10761 [Drosophila virilis]	0			---NA---	none	prot only	prot only
THRIPS_11_08_2011_01269	None	0	0			---NA---	0			---NA---	none
THRIPS_11_08_2011_01270	Good	3	5	1.54156e-14	0.552	k1267_human ame: full=mll1 mll complex subunit kiaa1267	20	4.65604e-71	0.734	tribolium castaneum cg4699 cg4699-pa mrna	protein	nucl	nucl
THRIPS_11_08_2011_01271	Weak	0	0			---NA---	0			---NA---	none
THRIPS_11_08_2011_01272	Weak	0	0			---NA---	0			---NA---	none
THRIPS_11_08_2011_01273	Strong	44	20	0	0.6295	mib_drome ame: full=e3 ubiquitin-protein ligase mind-bomb ame: full=mind bomb homolog short=d-mib	20	0	0.943	apis mellifera ubiquitin ligase protein mind-bomb mrna	protein	nucl	nucl
THRIPS_11_08_2011_01274	Weak	0	0			---NA---	0			---NA---	none
THRIPS_11_08_2011_01275	Weak	0	0			---NA---	0			---NA---	none
THRIPS_11_08_2011_01276	Good	3	20	1.2343e-15	0.7565	poly	20	3.94088e-21	0.7625	schistosoma mansoni strain puerto rico chromosome complete genome	uncertain	nucl	nucl
THRIPS_11_08_2011_01277	None	0	0			---NA---	0			---NA---	none
THRIPS_11_08_2011_01278	None	0	0			---NA---	0			---NA---	none
THRIPS_11_08_2011_01279	Weak	0	0			---NA---	0			---NA---	none
THRIPS_11_08_2011_01280	None	0	0			---NA---	0			---NA---	none
THRIPS_11_08_2011_01281	Strong	20	20	3.98054e-126	0.64	iqec1_human ame: full=iq motif and sec7 domain-containing protein 1 ame: full=adp-ribosylation factors guanine nucleotide-exchange protein 100 ame: full=adp-ribosylation factors guanine nucleotide-exchange protein 2 ame: full=brefeldin-resistant arf-gef 2 protein	20	0	0.9295	drosophila melanogaster schizo transcript variant mrna	protein	nucl	nucl
THRIPS_11_08_2011_01282	None	0	0			---NA---	0			---NA---	none
THRIPS_11_08_2011_01283	Good	7	12	1.21851e-20	0.676667	cept1_xenla ame: full=choline ethanolaminephosphotransferase 1	20	9.58681e-36	0.827	aedes aegypti ethanolaminephosphotransferase partial mrna	protein	nucl	nucl
THRIPS_11_08_2011_01284	Weak	0	0			---NA---	0			---NA---	none
THRIPS_11_08_2011_01285	None	0	0			---NA---	0			---NA---	none
THRIPS_11_08_2011_01286	None	0	0			---NA---	0			---NA---	none
THRIPS_11_08_2011_01287	Weak	0	0			---NA---	0			---NA---	none
THRIPS_11_08_2011_01288	Strong	3	20	8.16353e-31	0.816	inhibitor lrp isoform b	20	1.31435e-34	0.8255	drosophila melanogaster inhibitor lrp interactor transcript variant mrna	protein	nucl	nucl
THRIPS_11_08_2011_01289	None	0	0			---NA---	0			---NA---	none
THRIPS_11_08_2011_01290	None	0	0			---NA---	0			---NA---	none
THRIPS_11_08_2011_01291	None	0	0			---NA---	0			---NA---	none
THRIPS_11_08_2011_01292	None	0	0			---NA---	0			---NA---	none
THRIPS_11_08_2011_01293	Good	13	5	1.88414e-29	0.672	sos_drome ame: full=protein son of sevenless	20	1.97985e-42	0.748	pediculus humanus corporis ras gtp exchange son of mrna	protein	nucl	nucl
THRIPS_11_08_2011_01294	None	0	0			---NA---	0			---NA---	none
THRIPS_11_08_2011_01295	None	0	0			---NA---	0			---NA---	none
THRIPS_11_08_2011_01296	Strong	23	20	2.47061e-13	0.577	rpgrh_caeel ame: full=x-linked retinitis pigmentosa gtpase regulator homolog ame: full=gut granule loss protein 4	20	1.45255e-20	0.6705	apis mellifera hypothetical loc552399 miscrna	miscrna	nucl	nucl
THRIPS_11_08_2011_01297	Weak	0	0			---NA---	0			---NA---	none
THRIPS_11_08_2011_01298	None	0	0			---NA---	0			---NA---	none
THRIPS_11_08_2011_01299	Strong	7	17	1.03115e-33	0.647059	eaf_drose ame: full=ell-associated factor eaf	20	1.29139e-55	0.7715	drosophila melanogaster ell-associated factor transcript variant mrna	protein	nucl	nucl
THRIPS_11_08_2011_01300	Weak	0	0			---NA---	2	4.72592e-16	0.755	phakopsora pachyrhizi clone jgiafna- complete sequence	uncertain	nucl only	nucl only
THRIPS_11_08_2011_01301	Strong	26	17	1.55834e-23	0.807647	gm4d_yere8 ame: full=probable gdp-mannose -dehydratase ame: full=gdp-d-mannose dehydratase ame: full=	20	1.02171e-33	0.9295	candidatus puniceispirillum marinum complete genome	uncertain	nucl	nucl
THRIPS_11_08_2011_01302	Weak	6	4	8.81338e-14	0.58	tgfa1_human ame: full=transforming growth factor-beta receptor-associated protein 1 short=tgf-beta receptor-associated protein 1 short=trap-1 short=trap1	19	4.87984e-13	0.605789	homo sapiens transforming growth beta receptor associated protein 1 transcript variant mrna	protein	prot	nucl
THRIPS_11_08_2011_01303	Weak	0	0			---NA---	0			---NA---	none
THRIPS_11_08_2011_01304	Weak	0	0			---NA---	0			---NA---	none
THRIPS_11_08_2011_01305	Strong	2	13	1.07186e-14	0.446154	cp190_drome ame: full=centrosome-associated zinc finger protein cp190 ame: full=protein enhancer of mod 4-1 ame: full=dmap190	20	1.63534e-28	0.631	drosophila melanogaster chromosome complete sequence	uncertain	nucl	nucl
THRIPS_11_08_2011_01306	Weak	0	0			---NA---	0			---NA---	none
THRIPS_11_08_2011_01307	None	0	0			---NA---	0			---NA---	none
THRIPS_11_08_2011_01308	Weak	0	0			---NA---	0			---NA---	none
THRIPS_11_08_2011_01309	Weak	0	0			---NA---	0			---NA---	none
THRIPS_11_08_2011_01310	Good	17	12	1.27914e-102	0.609167	gshb_human ame: full=glutathione synthetase short=gsh synthetase short=gsh-s ame: full=glutathione synthase	20	0	0.7385	drosophila melanogaster cg32495 transcript variant mrna	protein	nucl	nucl
THRIPS_11_08_2011_01311	None	20	11	0	0.632727	marf_drome ame: full=transmembrane gtpase marf ame: full=mitochondrial assembly regulatory factor ame: full=mitofusin	20	0	0.786	nasonia vitripennis transmembrane gtpase marf- transcript variant 2 mrna	protein	nucl	nucl
THRIPS_11_08_2011_01312	Weak	0	1	4.23145e-14	0.76	nu301_drome ame: full=nucleosome-remodeling factor subunit nurf301 ame: full=enhancer of bithorax ame: full=nucleosome-remodeling factor 215 kda subunit short=nurf-215	20	1.42656e-33	0.822	drosophila melanogaster enhancer of bithorax (e ) transcript variant mrna	protein	nucl	nucl
THRIPS_11_08_2011_01313	Good	27	20	5.33668e-105	0.8485	rs6_manse ame: full=40s ribosomal protein s6	20	3.71667e-124	0.927	bombus impatiens 40s ribosomal protein s6-like mrna	protein	nucl	nucl
THRIPS_11_08_2011_01314	Strong	5	20	0	0.5485	dhx57_human ame: full= atp-dependent rna helicase dhx57 ame: full=deah box protein 57	20	0	0.7695	nasonia vitripennis atp-dependent rna helicase dhx57- transcript variant 2 mrna	protein	nucl	nucl
THRIPS_11_08_2011_01315	Weak	0	0			---NA---	0			---NA---	none
THRIPS_11_08_2011_01316	Strong	11	20	0	0.673	galt5_drome ame: full=polypeptide n-acetylgalactosaminyltransferase 5 short=pp- ase 5 ame: full=protein-udp acetylgalactosaminyltransferase 5 ame: full=udp- c:polypeptide n-acetylgalactosaminyltransferase 5	20	0	0.855	tribolium castaneum polypeptide c transferase 5 cg31651-pa mrna	protein	nucl	nucl
THRIPS_11_08_2011_01317	Weak	0	0			---NA---	3	6.61635e-06	0.55	culex quinquefasciatus three prime repair exonuclease mrna	protein	nucl only	nucl only
THRIPS_11_08_2011_01318	Weak	3	20	1.46661e-96	0.8465	tpm_locmi ame: full=tropomyosin	20	2.72687e-138	0.89	drosophila melanogaster tropomyosin 1 transcript variant mrna	protein	nucl	nucl
THRIPS_11_08_2011_01319	Weak	0	0			---NA---	0			---NA---	none
THRIPS_11_08_2011_01320	Strong	3	7	4.97651e-62	0.604286	dpp3_human ame: full=dipeptidyl peptidase 3 ame: full=dipeptidyl aminopeptidase iii ame: full=dipeptidyl arylamidase iii ame: full=dipeptidyl peptidase iii short=dpp iii	20	3.649e-75	0.6895	aedes aegypti dipeptidyl peptidase iii partial mrna	protein	nucl	nucl
THRIPS_11_08_2011_01321	Strong	3	7	2.71564e-157	0.707143	dpp3_drome ame: full=dipeptidyl peptidase 3 ame: full=dipeptidyl aminopeptidase iii short=dipeptidyl arylamidase iii ame: full=dipeptidyl peptidase iii short=dpp iii	20	0	0.8035	aedes aegypti dipeptidyl peptidase iii partial mrna	protein	nucl	nucl
THRIPS_11_08_2011_01322	Weak	18	19	7.7612e-27	0.442105	myo5a_human ame: full=myosin-va ame: full=dilute myosin heavy non-muscle ame: full=myosin heavy chain 12 ame: full=myosin-12 ame: full=myoxin	20	2.06239e-77	0.623	drosophila melanogaster dilute class unconventional myosin transcript variant mrna	protein	nucl	nucl
THRIPS_11_08_2011_01323	Strong	3	12	4.08945e-151	0.501667	tm63b_human ame: full=transmembrane protein 63b	20	0	0.736	acyrthosiphon pisum transmembrane protein 63a-like mrna	protein	nucl	nucl
THRIPS_11_08_2011_01324	Good	14	20	0	0.699	copg2_fugru ame: full=coatomer subunit gamma-2 ame: full=gamma-2-coat protein short=gamma-2-cop	20	0	0.888	drosophila melanogaster gamma-coatomer protein transcript variant mrna	protein	nucl	nucl
THRIPS_11_08_2011_01325	Good	6	13	1.48266e-164	0.491538	ubr1_drome ame: full=e3 ubiquitin-protein ligase ubr1 ame: full=n-recognin ame: full=ubiquitin-protein ligase e3-alpha	20	0	0.672	acyrthosiphon pisum e3 ubiquitin-protein ligase ubr1-like mrna	protein	nucl	nucl
THRIPS_11_08_2011_01326	Strong	12	12	0	0.5825	fbx11_human ame: full=f-box only protein 11 ame: full=vitiligo-associated protein 1 short=vit-1	20	0	0.938	bombus terrestris f-box only protein 11-like partial mrna	protein	nucl	nucl
THRIPS_11_08_2011_01327	Strong	6	1	2.45809e-06	0.57	egln1_human ame: full=egl nine homolog 1 ame: full=hypoxia-inducible factor prolyl hydroxylase 2 short=hif-ph2 short=hif-prolyl hydroxylase 2 short=hph-2 ame: full=prolyl hydroxylase domain-containing protein 2 short=phd2 ame: full=sm-20	20	4.09988e-19	0.5925	anopheles gambiae pest agap011530-pa partial cds	protein	nucl	nucl
THRIPS_11_08_2011_01328	Weak	0	0			---NA---	0			---NA---	none
THRIPS_11_08_2011_01329	None	0	0			---NA---	0			---NA---	none
THRIPS_11_08_2011_01330	Strong	35	20	2.78411e-157	0.581	s27a4_macfa ame: full=long-chain fatty acid transport protein 4 short=fatp-4 short=fatty acid transport protein 4 ame: full=solute carrier family 27 member 4	20	0	0.769	nasonia vitripennis long-chain fatty acid transport protein 4-like mrna	protein	nucl	nucl
THRIPS_11_08_2011_01331	None	0	0			---NA---	0			---NA---	none
THRIPS_11_08_2011_01332	Strong	25	20	6.95387e-29	0.6415	dus3_human ame: full=dual specificity protein phosphatase 3 ame: full=dual specificity protein phosphatase vhr	20	0	0.8015	drosophila melanogaster cg7378 transcript variant mrna	protein	nucl	nucl
THRIPS_11_08_2011_01333	Weak	11	15	1.93478e-69	0.573333	nucb2_rat ame: full=nucleobindin-2 ame: full=dna-binding protein nefa flags: precursor	20	1.84885e-120	0.804	pediculus humanus corporis nucleobindin-1 mrna	protein	nucl	nucl
THRIPS_11_08_2011_01334	Good	16	20	1.86931e-115	0.762	mdhc_chick ame: full=malate cytoplasmic ame: full=cytosolic malate dehydrogenase	20	1.00153e-148	0.871	pediculus humanus corporis malate mrna	protein	nucl	nucl
THRIPS_11_08_2011_01335	Strong	23	20	7.40419e-77	0.77	rab37_human ame: full=ras-related protein rab-37	20	2.02864e-89	0.9095	drosophila melanogaster rab26 transcript variant mrna	protein	nucl	nucl
THRIPS_11_08_2011_01336	Strong	13	20	3.83727e-90	0.6245	puf68_drome ame: full=poly -binding-splicing factor half pint short=protein half pint ame: full=68 kda poly -binding-splicing factor ame: full=puf60 homolog	20	1.21164e-116	0.9385	drosophila melanogaster poly u binding factor 68kd transcript variant mrna	protein	nucl	nucl
THRIPS_11_08_2011_01337	Weak	0	0			---NA---	0			---NA---	none
THRIPS_11_08_2011_01338	Weak	0	20	1.02848e-36	0.855	failed axon connections protein	20	1.32894e-43	0.856	tribolium castaneum failed axon connections protein mrna	protein	nucl	nucl
THRIPS_11_08_2011_01339	Strong	11	4	4.70383e-25	0.4925	setd5_mouse ame: full=set domain-containing protein 5	20	2.73669e-63	0.8245	tribolium castaneum cg9007 cg9007-pa mrna	protein	nucl	nucl
THRIPS_11_08_2011_01340	None	0	0			---NA---	0			---NA---	none
THRIPS_11_08_2011_01341	Strong	18	20	1.92988e-124	0.6035	alg11_danre ame: full=asparagine-linked glycosylation protein 11 homolog	20	2.59288e-172	0.757	apis mellifera alpha- -mannosyltransferase mrna	protein	nucl	nucl
THRIPS_11_08_2011_01342	Good	24	20	1.0974e-177	0.6935	ugpa_bovin ame: full=utp--glucose-1-phosphate uridylyltransferase ame: full=udp-glucose pyrophosphorylase short=udpgp short=ugpase	20	0	0.91	acyrthosiphon pisum udp-glucose pyrophosphorylase 2-like transcript variant mrna	protein	nucl	nucl
THRIPS_11_08_2011_01343	Strong	19	20	0	0.501	gbf1_human ame: full=golgi-specific brefeldin a-resistance guanine nucleotide exchange factor 1 short=bfa-resistant gef 1	20	0	0.81	pediculus humanus corporis golgi-specific brefeldin a-resistance guanine nucleotide exchange mrna	protein	nucl	nucl
THRIPS_11_08_2011_01344	Strong	3	20	1.47191e-10	0.407	csd_staes ame: full=probable cysteine desulfurase	20	0	0.794	strongylocentrotus purpuratus hypothetical loc590956 mrna	protein	nucl	nucl
THRIPS_11_08_2011_01346	Strong	8	20	1.28079e-52	0.496	snak_drome ame: full=serine protease snake flags: precursor	20	1.17905e-71	0.647	tribolium castaneum serine protease mrna	protein	nucl	nucl
THRIPS_11_08_2011_01347	Strong	1	2	1.38927e-24	0.565	fbxw9_human ame: full=f-box wd repeat-containing protein 9 ame: full=f-box and wd-40 domain-containing protein 9	20	4.65434e-33	0.6155	strongylocentrotus purpuratus hypothetical loc590729 mrna	protein	nucl	nucl
THRIPS_11_08_2011_01348	Strong	28	20	8.88975e-21	0.745	cr3l4_xentr ame: full=cyclic amp-responsive element-binding protein 3-like protein 4 short=camp-responsive element-binding protein 3-like protein 4 contains: ame: full=processed cyclic amp-responsive element-binding protein 3-like protein 4	20	4.94495e-47	0.8035	strongylocentrotus purpuratus camp responsive element binding protein 3-like 3 mrna	protein	nucl	nucl
THRIPS_11_08_2011_01349	Weak	0	0			---NA---	0			---NA---	none
THRIPS_11_08_2011_01350	Weak	0	0			---NA---	0			---NA---	none
THRIPS_11_08_2011_01351	None	0	0			---NA---	0			---NA---	none
THRIPS_11_08_2011_01352	Good	18	20	7.6298e-87	0.905	arf2_drome ame: full=adp-ribosylation factor 2 ame: full=darf ii	20	5.03265e-104	0.929	bombus terrestris adp-ribosylation factor 2-like mrna	protein	nucl	nucl
THRIPS_11_08_2011_01353	None	0	0			---NA---	0			---NA---	none
THRIPS_11_08_2011_01354	Weak	0	0			---NA---	0			---NA---	none
THRIPS_11_08_2011_01355	Strong	8	20	0	0.6005	tbcd9_human ame: full=tbc1 domain family member 9 ame: full=tbc1 domain family member 9a	20	0	0.8005	apis mellifera rab gtpase activating protein 12 mrna	protein	nucl	nucl
THRIPS_11_08_2011_01356	None	0	0			---NA---	0			---NA---	none
THRIPS_11_08_2011_01357	Strong	1	5	1.73139e-34	0.64	cd041_danre ame: full=upf0636 protein c4orf41 homolog ame: full=protein foie gras	20	7.13222e-47	0.652	tribolium castaneum flj12716-like protein mrna	protein	nucl	nucl
THRIPS_11_08_2011_01358	Weak	0	2	1.01543e-09	0.675	hypothetical protein ECU04_1370 [Encephalitozoon cuniculi GB-M1]	4	2.65424e-12	0.675	chromosome iv of strain gb-m1 of encephalitozoon cuniculi	uncertain	nucl	nucl
THRIPS_11_08_2011_01359	Weak	0	0			---NA---	0			---NA---	none
THRIPS_11_08_2011_01360	Weak	7	13	2.77445e-07	0.619231	atp gtp-binding protein	5	1.19881e-15	0.738	rhodobacter sphaeroides kd131 chromosome complete sequence	bacterial	nucl	nucl
THRIPS_11_08_2011_01361	Weak	0	0			---NA---	0			---NA---	none
THRIPS_11_08_2011_01362	Good	18	20	3.9821e-51	0.462	rock1_rabit ame: full=rho-associated protein kinase 1 ame: full=corneal epithelial rho-associated-ser thr kinase 1 ame: full=hebm1 ame: full=rho- coiled-coil-containing protein kinase 1 ame: full=camp-dependent protein kinase rock-i short= ame: full=p160 rock-1 short=p160rock	20	2.48429e-116	0.7785	bombus terrestris rho-associated protein kinase 2-like mrna	protein	nucl	nucl
THRIPS_11_08_2011_01363	Good	14	6	1.04528e-19	0.81	dhx9_bovin ame: full=atp-dependent rna helicase a ame: full=deah box protein 9 ame: full=nuclear dna helicase ii short=ndh ii	20	3.85545e-24	0.8505	saccoglossus kowalevskii atp-dependent rna helicase a-like mrna	protein	nucl	nucl
THRIPS_11_08_2011_01364	Strong	21	2	1.32535e-06	0.645	msh6_human ame: full=dna mismatch repair protein msh6 short=hmsh6 ame: full=g t mismatch-binding protein short=gtbp short=gtmbp ame: full= -alpha 160 kda subunit short=p160	20	4.16044e-14	0.6625	strongylocentrotus purpuratus hypothetical loc593059 mrna	protein	nucl	nucl
THRIPS_11_08_2011_01365	None	0	0			---NA---	0			---NA---	none
THRIPS_11_08_2011_01366	Weak	0	0			---NA---	0			---NA---	none
THRIPS_11_08_2011_01367	Weak	0	0			---NA---	0			---NA---	none
THRIPS_11_08_2011_01368	Weak	0	1	1.51211e-06	0.43	b lymphoma mo-mlv insertion region	0			---NA---	none	prot only	prot only
THRIPS_11_08_2011_01369	Weak	0	0			---NA---	0			---NA---	none
THRIPS_11_08_2011_01370	Weak	0	0			---NA---	0			---NA---	none
THRIPS_11_08_2011_01371	Weak	0	0			---NA---	0			---NA---	none
THRIPS_11_08_2011_01372	None	1	2	3.66438e-07	0.755	conserved hypothetical protein [Pediculus humanus corporis]	7	6.39555e-09	0.748571	Pediculus humanus corporis conserved hypothetical protein, mRNA	protein	nucl	prot
THRIPS_11_08_2011_01373	Weak	0	20	1.04837e-14	0.858	hypothetical conserved protein	20	2.26371e-18	0.837	rhodopseudomonas palustris complete genome	uncertain	nucl	prot
THRIPS_11_08_2011_01374	None	0	0			---NA---	0			---NA---	none
THRIPS_11_08_2011_01375	None	40	20	3.65867e-82	0.816	rab4b_danre ame: full=ras-related protein rab-4b	20	6.91508e-100	0.917	drosophila melanogaster rab-protein 4 transcript variant mrna	protein	nucl	nucl
THRIPS_11_08_2011_01376	None	0	0			---NA---	0			---NA---	none
THRIPS_11_08_2011_01377	Weak	0	0			---NA---	0			---NA---	none
THRIPS_11_08_2011_01378	Strong	1	20	2.35393e-23	0.526	polx_tobac ame: full=retrovirus-related pol polyprotein from transposon tnt 1-94 includes: ame: full=protease includes: ame: full=reverse transcriptase includes: ame: full=endonuclease	20	1.19123e-28	0.639	xenopus tropicalis copia mrna	protein	nucl	nucl
THRIPS_11_08_2011_01379	Good	1	6	1.55365e-23	0.84	zswm6_human ame: full=zinc finger swim domain-containing protein 6	20	1.9293e-36	0.898	strongylocentrotus purpuratus zinc finger swim domain-containing protein 5 mrna	protein	nucl	nucl
THRIPS_11_08_2011_01380	Weak	0	0			---NA---	0			---NA---	none
THRIPS_11_08_2011_01381	Strong	6	20	1.84772e-24	0.6765	isoc1_danre ame: full=isochorismatase domain-containing protein 1	20	1.5232e-30	0.7265	strongylocentrotus purpuratus loc495931 protein mrna	protein	nucl	nucl
THRIPS_11_08_2011_01382	Weak	0	0			---NA---	0			---NA---	none
THRIPS_11_08_2011_01383	None	0	0			---NA---	0			---NA---	none
THRIPS_11_08_2011_01384	Weak	0	0			---NA---	0			---NA---	none
THRIPS_11_08_2011_01385	Strong	33	20	2.86616e-82	0.5455	rasa1_rat ame: full=ras gtpase-activating protein 1 short=gap short=gtpase-activating protein short= ame: full=ras p21 protein activator ame: full=p120gap	20	1.15828e-177	0.9475	drosophila melanogaster vacuolar peduncle transcript variant mrna	protein	nucl	nucl
THRIPS_11_08_2011_01386	None	0	0			---NA---	0			---NA---	none
THRIPS_11_08_2011_01387	None	0	0			---NA---	0			---NA---	none
THRIPS_11_08_2011_01388	Weak	0	0			---NA---	0			---NA---	none
THRIPS_11_08_2011_01389	Weak	4	19	7.48825e-13	0.630526	serine threonine-protein kinase ulk3	20	5.00231e-16	0.634	bombus terrestris serine threonine-protein kinase ulk3-like mrna	protein	nucl	nucl
THRIPS_11_08_2011_01390	None	0	0			---NA---	0			---NA---	none
THRIPS_11_08_2011_01391	Strong	23	20	6.33877e-121	0.51	aifm1_human ame: full=apoptosis-inducing factor mitochondrial ame: full=programmed cell death protein 8 flags: precursor	20	2.20631e-160	0.781	tribolium castaneum apoptosis-inducing factor mitochondrial precursor (programmed cell death protein 8) mrna	protein	nucl	nucl
THRIPS_11_08_2011_01392	None	0	0			---NA---	0			---NA---	none
THRIPS_11_08_2011_01393	None	22	7	4.43542e-10	0.612857	smc1a_xenla ame: full=structural maintenance of chromosomes protein 1a short=smc protein 1a short=smc-1a short=xsmc1	11	3.04255e-16	0.696364	apis mellifera structural maintenance of chromosome protein transcript variant 1 mrna	protein	nucl	nucl
THRIPS_11_08_2011_01394	Weak	8	13	2.02323e-25	0.376154	tyrosine-protein phosphatase non-receptor type 23	9	5.15497e-27	0.696667	tribolium castaneum tyrosine-protein phosphatase non-receptor type 23 mrna	protein	nucl	nucl
THRIPS_11_08_2011_01395	Weak	0	0			---NA---	0			---NA---	none
THRIPS_11_08_2011_01396	Weak	0	0			---NA---	0			---NA---	none
THRIPS_11_08_2011_01397	Weak	0	0			---NA---	0			---NA---	none
THRIPS_11_08_2011_01398	Weak	0	0			---NA---	0			---NA---	none
THRIPS_11_08_2011_01399	Weak	20	4	2.74051e-12	0.705	arhgc_human ame: full=rho guanine nucleotide exchange factor 12 ame: full=leukemia-associated	20	9.43927e-20	0.7115	homo sapiens rho guanine nucleotide exchange factor 12 transcript variant mrna	protein	nucl	nucl
THRIPS_11_08_2011_01400	None	0	16	1.21908e-12	0.655	leucine rich protein	20	5.23584e-41	0.818	corynebacterium aurimucosum atcc complete genome	bacterial	nucl	nucl
THRIPS_11_08_2011_01401	Weak	0	0			---NA---	0			---NA---	none
THRIPS_11_08_2011_01402	Strong	45	20	1.81885e-28	0.7345	mib1_xenla ame: full=e3 ubiquitin-protein ligase mib1 ame: full=mind bomb homolog 1	20	6.28278e-36	0.9405	pediculus humanus corporis mind mrna	protein	nucl	nucl
THRIPS_11_08_2011_01403	Weak	0	0			---NA---	0			---NA---	none
THRIPS_11_08_2011_01404	Good	4	13	2.45344e-11	0.784615	serine threonine-protein kinase 16	18	4.91573e-15	0.803889	bombus impatiens serine threonine-protein kinase 16- transcript variant 2 mrna	protein	nucl	nucl
THRIPS_11_08_2011_01405	Weak	0	0			---NA---	0			---NA---	none
THRIPS_11_08_2011_01406	None	0	2	6.3482e-20	0.745	hypothetical protein ECU01_0230 [Encephalitozoon cuniculi GB-M1]	4	1.21181e-12	0.645	chromosome i of strain gb-m1 of encephalitozoon cuniculi	uncertain	prot	prot
THRIPS_11_08_2011_01407	None	0	0			---NA---	0			---NA---	none
THRIPS_11_08_2011_01408	None	0	0			---NA---	0			---NA---	none
THRIPS_11_08_2011_01409	Weak	7	20	2.67484e-18	0.737	disheveled associated activator of morphogenesis	20	1.59799e-21	0.743	drosophila melanogaster dishevelled associated activator of morphogenesis transcript variant mrna	protein	nucl	nucl
THRIPS_11_08_2011_01410	None	0	0			---NA---	0			---NA---	none
THRIPS_11_08_2011_01411	Weak	0	0			---NA---	0			---NA---	none
THRIPS_11_08_2011_01412	Weak	0	0			---NA---	0			---NA---	none
THRIPS_11_08_2011_01413	Good	8	11	3.09349e-32	0.694545	5nt3_danre ame: full=cytosolic 5 -nucleotidase 3 ame: full=cytosolic 5 -nucleotidase iii short=cn-iii	20	1.92811e-38	0.724	bos taurus 5 - cytosolic iii mrna	protein	nucl	nucl
THRIPS_11_08_2011_01414	Weak	1	2	3.70063e-31	0.74	y114_chlmu ame: full=uncharacterized protein tc_0114	20	0	0.8875	uncultured sphingobacteria whole genome shotgun sequence	bacterial	nucl	nucl
THRIPS_11_08_2011_01415	Weak	0	0			---NA---	0			---NA---	none
THRIPS_11_08_2011_01416	Weak	0	0			---NA---	0			---NA---	none
THRIPS_11_08_2011_01417	None	0	0			---NA---	0			---NA---	none
THRIPS_11_08_2011_01418	Strong	11	20	0	0.67	canb_drome ame: full=calpain-b ame: full=calcium-activated neutral proteinase b short=canp b contains: ame: full=calpain-b catalytic subunit 1 contains: ame: full=calpain-b catalytic subunit 2	20	0	0.8125	drosophila melanogaster calpain-a transcript variant mrna	protein	nucl	nucl
THRIPS_11_08_2011_01419	Weak	9	3	1.48453e-06	0.52	conserved hypothetical protein [Culex quinquefasciatus]	0			---NA---	none	prot only	prot only
THRIPS_11_08_2011_01420	Weak	0	0			---NA---	0			---NA---	none
THRIPS_11_08_2011_01421	None	0	0			---NA---	0			---NA---	none
THRIPS_11_08_2011_01422	Weak	0	0			---NA---	0			---NA---	none
THRIPS_11_08_2011_01424	Weak	0	0			---NA---	0			---NA---	none
THRIPS_11_08_2011_01425	Strong	13	3	4.90126e-09	0.74	rpgf2_mouse ame: full=rap guanine nucleotide exchange factor 2 ame: full=neural rap guanine nucleotide exchange protein short=nrap gep ame: full=pdz domain-containing guanine nucleotide exchange factor 1 short=pdz-gef1	20	2.40086e-26	0.9335	aedes aegypti guanine nucleotide exchange factor partial mrna	protein	nucl	nucl
THRIPS_11_08_2011_01426	Weak	0	0			---NA---	0			---NA---	none
THRIPS_11_08_2011_01427	None	0	0			---NA---	0			---NA---	none
THRIPS_11_08_2011_01428	None	0	0			---NA---	0			---NA---	none
THRIPS_11_08_2011_01429	Good	2	4	1.13255e-08	0.6	zinc finger ccch domain-containing protein 13	0			---NA---	none	prot only	prot only
THRIPS_11_08_2011_01430	Weak	0	0			---NA---	0			---NA---	none
THRIPS_11_08_2011_01431	None	0	0			---NA---	0			---NA---	none
THRIPS_11_08_2011_01432	None	1	3	2.6716e-07	0.496667	ankl2_mouse ame: full=ankyrin repeat and lem domain-containing protein 2	20	4.99449e-13	0.6365	mus musculus ankyrin repeat and lem domain containing 2 transcript variant mrna	protein	nucl	nucl
THRIPS_11_08_2011_01433	None	0	0			---NA---	0			---NA---	none
THRIPS_11_08_2011_01434	None	0	0			---NA---	0			---NA---	none
THRIPS_11_08_2011_01435	None	0	0			---NA---	0			---NA---	none
THRIPS_11_08_2011_01436	None	0	0			---NA---	0			---NA---	none
THRIPS_11_08_2011_01437	Weak	0	0			---NA---	0			---NA---	none
THRIPS_11_08_2011_01438	None	0	0			---NA---	1	5.90719e-22	0.83	phakopsora pachyrhizi clone jgiafna- complete sequence	uncertain	nucl only	nucl only
THRIPS_11_08_2011_01439	Strong	11	8	1.32008e-43	0.68875	med13_drome ame: full=mediator of rna polymerase ii transcription subunit 13 ame: full=mediator complex subunit 13 ame: full=mediator complex subunit skuld ame: full=protein blind spot ame: full=protein poils aux pattes ame: full=dtrap240	20	7.28654e-63	0.819	drosophila melanogaster skuld transcript variant mrna	protein	nucl	nucl
THRIPS_11_08_2011_01440	None	0	0			---NA---	0			---NA---	none
THRIPS_11_08_2011_01441	Weak	0	0			---NA---	0			---NA---	none
THRIPS_11_08_2011_01442	Good	0	0			---NA---	0			---NA---	none
THRIPS_11_08_2011_01443	Weak	0	0			---NA---	0			---NA---	none
THRIPS_11_08_2011_01444	Strong	58	20	1.03846e-43	0.736	chdm_drome ame: full=chromodomain-helicase-dna-binding protein mi-2 homolog ame: full=atp-dependent helicase mi-2 short=dmi-2	20	1.78044e-56	0.9355	drosophila melanogaster mi-2 (mi-2) transcript variant mrna	protein	nucl	nucl
THRIPS_11_08_2011_01445	Weak	0	0			---NA---	0			---NA---	none
THRIPS_11_08_2011_01446	Weak	0	0			---NA---	0			---NA---	none
THRIPS_11_08_2011_01447	None	48	20	3.38566e-18	0.97	ubiq_enccu ame: full=ubiquitin flags: precursor	20	3.91416e-22	0.9525	homo sapiens ubiquitin c splice variant complete alternatively spliced	protein	nucl	prot
THRIPS_11_08_2011_01448	Weak	0	0			---NA---	0			---NA---	none
THRIPS_11_08_2011_01449	None	0	0			---NA---	0			---NA---	none
THRIPS_11_08_2011_01450	Weak	0	0			---NA---	0			---NA---	none
THRIPS_11_08_2011_01451	Strong	20	20	4.78049e-82	0.8235	grou_drome ame: full=protein groucho ame: full=enhancer of split m9 10 protein short=e m9 10	20	4.13283e-99	0.935	drosophila melanogaster groucho transcript variant mrna	protein	nucl	nucl
THRIPS_11_08_2011_01452	None	0	0			---NA---	0			---NA---	none
THRIPS_11_08_2011_01453	Weak	0	0			---NA---	0			---NA---	none
THRIPS_11_08_2011_01454	Strong	43	20	1.6866e-53	0.642	m3k1_human ame: full=mitogen-activated protein kinase kinase kinase 1 ame: full=mapk erk kinase kinase 1 short=mek kinase 1 short=mekk 1	20	7.3634e-67	0.7795	ixodes scapularis mitogen activated protein kinase kinase kinase mrna	protein	nucl	nucl
THRIPS_11_08_2011_01455	None	0	0			---NA---	0			---NA---	none
THRIPS_11_08_2011_01456	None	3	6	8.84446e-11	0.663333	galm_ponab ame: full=aldose 1-epimerase ame: full=galactose mutarotase	13	6.8495e-15	0.750769	bombus terrestris aldose 1-epimerase- transcript variant 1 mrna	protein	nucl	nucl
THRIPS_11_08_2011_01457	Weak	0	0			---NA---	0			---NA---	none
THRIPS_11_08_2011_01458	Weak	0	0			---NA---	0			---NA---	none
THRIPS_11_08_2011_01459	Weak	0	0			---NA---	0			---NA---	none
THRIPS_11_08_2011_01460	None	0	0			---NA---	0			---NA---	none
THRIPS_11_08_2011_01461	None	0	0			---NA---	0			---NA---	none
THRIPS_11_08_2011_01462	Good	11	6	3.09468e-16	0.623333	ppme1_mouse ame: full=protein phosphatase methylesterase 1 short=pme-1	19	6.14311e-18	0.743158	rattus norvegicus protein phosphatase methylesterase 1 mrna	protein	nucl	nucl
THRIPS_11_08_2011_01463	Strong	16	20	8.60456e-63	0.5985	dock9_rat ame: full=dedicator of cytokinesis protein 9 ame: full=cdc42 guanine nucleotide exchange factor zizimin-1 ame: full=protein trg	20	1.53424e-97	0.784	mus musculus dedicator of cytokinesis 9 transcript variant mrna	protein	nucl	nucl
THRIPS_11_08_2011_01464	Good	7	20	4.82974e-82	0.717	eif3k_bommo ame: full=eukaryotic translation initiation factor 3 subunit k short=eif3k ame: full=eif-3 p25	20	1.1792e-106	0.7945	apis mellifera eukaryotic translation initiation factor 3 subunit k-like mrna	protein	nucl	nucl
THRIPS_11_08_2011_01465	Weak	0	0			---NA---	0			---NA---	none
THRIPS_11_08_2011_01466	Weak	0	0			---NA---	0			---NA---	none
THRIPS_11_08_2011_01467	Good	14	15	2.10215e-21	0.699333	cap1_bovin ame: full=adenylyl cyclase-associated protein 1 short=cap 1	20	2.27465e-39	0.834	drosophila melanogaster capulet transcript variant mrna	protein	nucl	nucl
THRIPS_11_08_2011_01468	None	0	0			---NA---	0			---NA---	none
THRIPS_11_08_2011_01469	Weak	0	0			---NA---	0			---NA---	none
THRIPS_11_08_2011_01470	Weak	0	0			---NA---	0			---NA---	none
THRIPS_11_08_2011_01471	Weak	0	0			---NA---	0			---NA---	none
THRIPS_11_08_2011_01472	Strong	8	7	3.18843e-53	0.802857	tnpo1_bovin ame: full=transportin-1 ame: full=importin beta-2 ame: full=karyopherin beta-2	20	9.7619e-69	0.9225	oreochromis niloticus transportin-2- transcript variant 2 mrna	protein	nucl	nucl
THRIPS_11_08_2011_01473	Good	19	14	1.47652e-09	0.431429	uso1_yeast ame: full=intracellular protein transport protein uso1 short=int-1	0			---NA---	none	prot only	prot only
THRIPS_11_08_2011_01474	Weak	0	0			---NA---	0			---NA---	none
THRIPS_11_08_2011_01475	Good	3	6	1.51949e-66	0.748333	vps53_chick ame: full=vacuolar protein sorting-associated protein 53 homolog	20	8.45928e-80	0.902	strongylocentrotus purpuratus hypothetical loc591949 mrna	protein	nucl	nucl
THRIPS_11_08_2011_01476	None	0	0			---NA---	0			---NA---	none
THRIPS_11_08_2011_01477	Weak	0	0			---NA---	0			---NA---	none
THRIPS_11_08_2011_01478	Strong	1	8	1.23813e-12	0.55	lrc40_danre ame: full=leucine-rich repeat-containing protein 40	20	6.61546e-15	0.6935	drosophila melanogaster flyers-cup (f-cup) transcript variant mrna	protein	nucl	nucl
THRIPS_11_08_2011_01479	None	0	0			---NA---	0			---NA---	none
THRIPS_11_08_2011_01480	Weak	0	0			---NA---	0			---NA---	none
THRIPS_11_08_2011_01481	Good	19	20	3.51629e-77	0.6985	ugpa_bovin ame: full=utp--glucose-1-phosphate uridylyltransferase ame: full=udp-glucose pyrophosphorylase short=udpgp short=ugpase	20	2.58857e-118	0.854	acyrthosiphon pisum udp-glucose pyrophosphorylase 2-like transcript variant mrna	protein	nucl	nucl
THRIPS_11_08_2011_01482	None	0	0			---NA---	0			---NA---	none
THRIPS_11_08_2011_01483	Weak	0	0			---NA---	20	4.36983e-94	0.832	phaeosphaeria nodorum sn15 complete genome	uncertain	nucl only	nucl only
THRIPS_11_08_2011_01484	Strong	33	20	3.03121e-19	0.5775	shan2_human ame: full=sh3 and multiple ankyrin repeat domains protein 2 short=shank2 ame: full=cortactin-binding protein 1 short= 1 ame: full=proline-rich synapse-associated protein 1	20	7.6291e-66	0.8515	tribolium castaneum ga15871-pa mrna	protein	nucl	nucl
THRIPS_11_08_2011_01485	Strong	0	1	8.42763e-14	0.67	lsd1_drome ame: full=lipid storage droplets surface-binding protein 1	20	5.24047e-20	0.6925	drosophila melanogaster lipid storage droplet-1 (lsd-1) transcript variant mrna	protein	nucl	nucl
THRIPS_11_08_2011_01486	Strong	12	20	1.51948e-44	0.5585	pgta_bovin ame: full=geranylgeranyl transferase type-2 subunit alpha ame: full=geranylgeranyl transferase type ii subunit alpha ame: full=rab geranyl-geranyltransferase subunit alpha short=rab gg transferase alpha short=rab ggtase alpha ame: full=rab geranylgeranyltransferase subunit alpha	20	2.50082e-57	0.681	homo sapiens rab alpha subunit transcript variant mrna	protein	nucl	nucl
THRIPS_11_08_2011_01487	Good	2	6	3.13686e-23	0.673333	dnlz_danre ame: full=dnl-type zinc finger protein	20	1.41489e-30	0.816	drosophila persimilis gl16522 (dper\gl16522) mrna	protein	nucl	nucl
THRIPS_11_08_2011_01488	Weak	0	0			---NA---	0			---NA---	none
THRIPS_11_08_2011_01489	Strong	14	20	2.04694e-87	0.7315	ef1g_artsa ame: full=elongation factor 1-gamma short=ef-1-gamma ame: full=eef-1b gamma	20	3.67905e-113	0.84	locusta migratoria translation elongation factor-1 gamma complete cds	protein	nucl	nucl
THRIPS_11_08_2011_01490	Weak	0	0			---NA---	0			---NA---	none
THRIPS_11_08_2011_01491	Good	7	11	3.45037e-44	0.625455	prod_drome ame: full=proline mitochondrial ame: full=proline oxidase ame: full=protein sluggish-a flags: precursor	20	1.67361e-59	0.815	drosophila melanogaster sluggish a transcript variant mrna	protein	nucl	nucl
THRIPS_11_08_2011_01492	Weak	7	20	1.72181e-25	0.5995	idgfl_bommo ame: full=chitinase-like protein en03 ame: full=imaginal disk growth factor-like protein flags: precursor	20	1.69239e-31	0.776	aedes aegypti imaginal disc growth factor partial mrna	protein	nucl	nucl
THRIPS_11_08_2011_01493	Strong	16	16	4.80983e-112	0.548125	lman1_mouse ame: full=protein ergic-53 ame: full=er-golgi intermediate compartment 53 kda protein ame: full=lectin mannose-binding 1 ame: full=p58 flags: precursor	20	0	0.862	drosophila melanogaster ergic53 transcript variant mrna	protein	nucl	nucl
THRIPS_11_08_2011_01494	Good	1	1	3.35285e-10	0.62	zswm7_danre ame: full=zinc finger swim domain-containing protein 7	20	4.50137e-13	0.5795	gallus gallus zinc swim-type containing 7 transcript variant mrna	protein	nucl	prot
THRIPS_11_08_2011_01495	None	0	0			---NA---	0			---NA---	none
THRIPS_11_08_2011_01496	Strong	8	20	6.32004e-49	0.7625	ef1d_drome ame: full=probable elongation factor 1-delta short=ef-1-delta	20	1.09497e-72	0.8545	aedes aegypti elongation factor -1 partial mrna	protein	nucl	nucl
THRIPS_11_08_2011_01497	Strong	1	1	2.37888e-10	0.66	a60da_drome ame: full=letm1 and ef-hand domain-containing protein anon- mitochondrial ame: full=leucine zipper-ef-hand-containing transmembrane protein 1 flags: precursor	16	4.71613e-17	0.80375	aedes aegypti paramyosin partial mrna	protein	nucl	nucl
THRIPS_11_08_2011_01498	Strong	6	20	5.57875e-28	0.537	sv2a_rat ame: full=synaptic vesicle glycoprotein 2a short=synaptic vesicle protein 2 short=synaptic vesicle protein 2a	20	3.46862e-75	0.6145	aedes aegypti synaptic vesicle protein partial mrna	protein	nucl	nucl
THRIPS_11_08_2011_01499	Weak	0	0			---NA---	0			---NA---	none
THRIPS_11_08_2011_01500	Weak	91	20	0	0.729	mvl_drome ame: full=protein malvolio	20	0	0.888	drosophila melanogaster malvolio transcript variant mrna	protein	nucl	nucl
THRIPS_11_08_2011_01501	Strong	4	20	2.06759e-14	0.5535	dnak_guith ame: full=chaperone protein dnak ame: full=hsp70 ame: full=heat shock 70 kda protein ame: full=heat shock protein 70	20	1.22938e-12	0.6015	strongylocentrotus purpuratus heat shock protein protein mrna	protein	prot	nucl
THRIPS_11_08_2011_01502	None	0	0			---NA---	0			---NA---	none
THRIPS_11_08_2011_01503	None	0	0			---NA---	0			---NA---	none
THRIPS_11_08_2011_01504	None	3	1	6.61685e-07	0.45	conserved hypothetical protein [Culex quinquefasciatus]	0			---NA---	none	prot only	prot only
THRIPS_11_08_2011_01505	None	1	3	9.9047e-08	0.583333	zinc finger fyve domain-containing protein 26	0			---NA---	none	prot only	prot only
THRIPS_11_08_2011_01506	Good	0	0			---NA---	0			---NA---	none
THRIPS_11_08_2011_01507	Weak	0	0			---NA---	0			---NA---	none
THRIPS_11_08_2011_01508	None	0	0			---NA---	0			---NA---	none
THRIPS_11_08_2011_01509	Strong	34	10	2.5313e-72	0.617	ncor1_xentr ame: full=nuclear receptor corepressor 1 short=n- short=n- 1 short=xn-	20	1.06281e-121	0.7835	drosophila melanogaster smrter transcript variant mrna	protein	nucl	nucl
THRIPS_11_08_2011_01510	Strong	2	13	1.26364e-95	0.433846	cat2_clok5 ame: full=4-hydroxybutyrate coenzyme a transferase	20	0	0.7925	anopheles gambiae pest agap004396-pa complete cds	protein	nucl	nucl
THRIPS_11_08_2011_01511	Weak	0	0			---NA---	0			---NA---	none
THRIPS_11_08_2011_01512	None	0	9	7.73583e-24	0.787778	senescence-associated protein	20	1.26741e-79	0.9105	ciona intestinalis clone: full insert sequence	uncertain	nucl	nucl
THRIPS_11_08_2011_01513	None	1	20	9.34597e-11	0.624	reverse ribonuclease integrase	20	2.26013e-13	0.608	strongylocentrotus purpuratus zinc finger protein mrna	protein	nucl	prot
THRIPS_11_08_2011_01514	None	0	0			---NA---	0			---NA---	none
THRIPS_11_08_2011_01515	Weak	0	0			---NA---	0			---NA---	none
THRIPS_11_08_2011_01516	Good	1	1	1.15218e-26	0.53	birc6_human ame: full=baculoviral iap repeat-containing protein 6 ame: full=ubiquitin-conjugating bir domain enzyme apollon	20	1.73318e-37	0.6615	nasonia vitripennis survivin 1 mrna	protein	nucl	nucl
THRIPS_11_08_2011_01517	Good	4	6	1.85123e-34	0.593333	k0020_human ame: full=pumilio domain-containing protein kiaa0020 ame: full=hbv x-transactivated gene 5 protein ame: full=hbv xag-transactivated protein 5 ame: full=minor histocompatibility antigen ha-8 short=hla-ha8	20	2.56716e-29	0.535	drosophila willistoni gk25048 (dwil\gk25048) mrna	protein	prot	prot
THRIPS_11_08_2011_01518	None	0	0			---NA---	0			---NA---	none
THRIPS_11_08_2011_01519	None	0	5	2.85619e-12	0.7	dehydration responsive protein	20	7.61449e-46	0.888	alicycliphilus denitrificans complete genome	uncertain	nucl	nucl
THRIPS_11_08_2011_01520	Weak	0	0			---NA---	0			---NA---	none
THRIPS_11_08_2011_01521	Strong	0	1	3.2025e-13	0.51	dtx_drome ame: full=protein deltex	18	8.70806e-11	0.62	drosophila miranda strain ga17782 partial cds	protein	prot	nucl
THRIPS_11_08_2011_01522	Strong	37	20	1.63685e-40	0.645	blm_drome ame: full=bloom syndrome protein homolog short=dmblm ame: full=mutagen-sensitive protein 309 ame: full= helicase homolog	20	3.96722e-54	0.732	culex quinquefasciatus atp-dependent dna helicase mrna	protein	nucl	nucl
THRIPS_11_08_2011_01523	Weak	0	2	1.61033e-07	0.88	kuzbanian cg7147- isoform a	5	2.88813e-09	0.88	bombus impatiens disintegrin and metalloproteinase domain-containing protein 10-like mrna	protein	nucl	nucl
THRIPS_11_08_2011_01524	Good	17	20	4.00268e-29	0.606	myro1_brebr ame: full=myrosinase 1 ame: full=beta-glucosidase 1 ame: full=beta-thioglucosidase 1 ame: full=beta-thioglucosidase glucohydrolase 1 ame: full=sinigrinase 1 ame: full=thioglucosidase 1	20	1.30627e-45	0.7105	tribolium castaneum beta-glucosidase mrna	protein	nucl	nucl
THRIPS_11_08_2011_01525	Weak	1	2	1.95386e-18	0.59	tbc25_human ame: full=tbc1 domain family member 25	20	1.59463e-38	0.842	apis mellifera rab gtpase activating protein transcript variant 2 mrna	protein	nucl	nucl
THRIPS_11_08_2011_01526	None	0	0			---NA---	0			---NA---	none
THRIPS_11_08_2011_01527	Weak	1	18	1.07965e-11	0.783889	pg1 protein	20	1.31748e-59	0.984	uncultured bacterium clone et_b_3b08 16s ribosomal rna partial sequence	bacterial	nucl	nucl
THRIPS_11_08_2011_01528	Weak	0	0			---NA---	0			---NA---	none
THRIPS_11_08_2011_01529	Weak	0	0			---NA---	0			---NA---	none
THRIPS_11_08_2011_01530	None	0	0			---NA---	0			---NA---	none
THRIPS_11_08_2011_01531	None	0	0			---NA---	0			---NA---	none
THRIPS_11_08_2011_01532	Weak	0	0			---NA---	0			---NA---	none
THRIPS_11_08_2011_01533	None	0	0			---NA---	0			---NA---	none
THRIPS_11_08_2011_01534	None	0	0			---NA---	0			---NA---	none
THRIPS_11_08_2011_01535	None	0	0			---NA---	0			---NA---	none
THRIPS_11_08_2011_01536	Strong	34	20	0	0.5925	cul1_mouse ame: full=cullin-1 short=cul-1	20	0	0.894	nasonia vitripennis cullin transcript variant 3 mrna	protein	nucl	nucl
THRIPS_11_08_2011_01537	None	0	0			---NA---	0			---NA---	none
THRIPS_11_08_2011_01538	None	0	0			---NA---	0			---NA---	none
THRIPS_11_08_2011_01539	Weak	0	0			---NA---	0			---NA---	none
THRIPS_11_08_2011_01540	None	0	0			---NA---	0			---NA---	none
THRIPS_11_08_2011_01541	None	0	0			---NA---	0			---NA---	none
THRIPS_11_08_2011_01542	Good	3	6	2.70601e-24	0.526667	edc4_danre ame: full=enhancer of mrna-decapping protein 4	20	7.39937e-38	0.735	bombus terrestris enhancer of mrna-decapping protein 4-like mrna	protein	nucl	nucl
THRIPS_11_08_2011_01543	Strong	10	20	0	0.7015	gfpt2_rat ame: full=glucosamine--fructose-6-phosphate aminotransferase 2 ame: full=d-fructose-6-phosphate amidotransferase 2 ame: full=glutamine:fructose 6 phosphate amidotransferase 2 short=gfat 2 short=gfat2 ame: full=hexosephosphate aminotransferase 2	20	0	0.919	drosophila melanogaster glutamine:fructose-6-phosphate aminotransferase 1 transcript variant mrna	protein	nucl	nucl
THRIPS_11_08_2011_01544	Strong	9	6	7.92428e-18	0.535	xbp1_human ame: full=x-box-binding protein 1 short=xbp-1 ame: full=tax-responsive element-binding protein 5	20	6.07337e-24	0.7425	cricetulus griseus x-box binding protein 1 (xbp-1) transcript variant mrna	protein	nucl	nucl
THRIPS_11_08_2011_01545	Weak	0	0			---NA---	0			---NA---	none
THRIPS_11_08_2011_01546	None	0	1	4.98721e-08	0.56	PREDICTED: similar to RH35990p [Nasonia vitripennis]	0			---NA---	none	prot only	prot only
THRIPS_11_08_2011_01547	Strong	4	20	5.68687e-84	0.4505	dna polymerase v	18	1.26529e-53	0.547222	strongylocentrotus purpuratus myb binding protein 1a-like mrna	protein	prot	nucl
THRIPS_11_08_2011_01548	None	19	17	2.99162e-22	0.785294	vatg_manse ame: full=v-type proton atpase subunit g short=v-atpase subunit g ame: full=v-atpase 13 kda subunit ame: full=vacuolar proton pump subunit g	20	2.01562e-26	0.8555	graphocephala atropunctata isolate whga0225 vacuolar atpase g subunit-like protein complete cds	protein	nucl	nucl
THRIPS_11_08_2011_01549	Strong	43	19	9.79311e-29	0.757895	yboxh_aplca ame: full=y-box factor homolog ame: full=apy1	20	1.06452e-44	0.8915	apis mellifera ypsilon schachtel mrna	protein	nucl	nucl
THRIPS_11_08_2011_01550	None	0	0			---NA---	0			---NA---	none
THRIPS_11_08_2011_01551	Strong	11	9	1.90436e-92	0.634444	ctns_drome ame: full=cystinosin homolog	20	6.49014e-109	0.816	nasonia vitripennis cystinosin transcript variant 2 mrna	protein	nucl	nucl
THRIPS_11_08_2011_01552	Strong	9	20	9.91932e-113	0.597	seric_nemve ame: full=probable serine incorporator	20	9.12572e-160	0.7395	aedes aegypti membrane protein tms1d partial mrna	protein	nucl	nucl
THRIPS_11_08_2011_01553	None	27	20	0	0.75	dhe3_drome ame: full=glutamate mitochondrial short=gdh flags: precursor	20	0	0.9355	aedes aegypti glutamate dehydrogenase partial mrna	protein	nucl	nucl
THRIPS_11_08_2011_01554	Strong	31	20	0	0.7325	mysa_drome ame: full=myosin heavy muscle	20	0	0.9425	drosophila melanogaster myosin heavy chain transcript variant mrna	protein	nucl	nucl
THRIPS_11_08_2011_01555	None	0	0			---NA---	1	5.84301e-18	0.7	phakopsora pachyrhizi clone jgiafna- complete sequence	uncertain	nucl only	nucl only
THRIPS_11_08_2011_01556	Strong	3	4	0	0.6375	csde1_rat ame: full=cold shock domain-containing protein e1 ame: full=protein unr	20	0	0.8385	tribolium castaneum agap004937-pa mrna	protein	nucl	nucl
THRIPS_11_08_2011_01557	None	3	20	3.11218e-33	0.452	cpn2_human ame: full=carboxypeptidase n subunit 2 ame: full=carboxypeptidase n 83 kda chain ame: full=carboxypeptidase n large subunit ame: full=carboxypeptidase n polypeptide 2 ame: full=carboxypeptidase n regulatory subunit flags: precursor	20	0	0.84	tribolium castaneum agap008611-pa mrna	protein	nucl	nucl
THRIPS_11_08_2011_01558	Strong	7	7	1.58598e-29	0.557143	rfip1_rat ame: full=rab11 family-interacting protein 1 short=rab11-fip1 ame: full=rab-coupling protein	20	1.79775e-91	0.822	drosophila melanogaster rab11 interacting protein transcript variant mrna	protein	nucl	nucl
THRIPS_11_08_2011_01559	Strong	2	20	0	0.723	k0664_aedae ame: full=protein kiaa0664 homolog	20	0	0.828	pediculus humanus corporis eukaryotic translation initiation factor 3 mrna	protein	nucl	nucl
THRIPS_11_08_2011_01560	Weak	19	20	0	0.5165	sptn5_human ame: full=spectrin beta brain 4 ame: full=bspecv ame: full=beta-v spectrin ame: full= non-erythroid beta chain 4	20	0	0.7795	drosophila melanogaster karst transcript variant mrna	protein	nucl	nucl
THRIPS_11_08_2011_01561	Strong	10	20	0	0.6145	glsn_medsa ame: full=glutamate synthase amyloplastic ame: full=nadh-gogat flags: precursor	20	0	0.824	drosophila melanogaster cg9674 transcript variant mrna	protein	nucl	nucl
THRIPS_11_08_2011_01562	Strong	14	20	0	0.661	cmc_drome ame: full=calcium-binding mitochondrial carrier protein aralar1	20	0	0.855	nasonia vitripennis calcium-binding mitochondrial carrier protein aralar1- transcript variant 2 mrna	protein	nucl	nucl
THRIPS_11_08_2011_01563	Good	3	10	0	0.882	nss_tswvl ame: full=non-structural protein ns-s	20	0	0.962	tomato spotted wilt virus isolate p105- nonstructural protein and nucleocapsid complete cds	virus	nucl	nucl
THRIPS_11_08_2011_01564	Strong	30	20	1.77683e-44	0.7115	rtn1_pantr ame: full=reticulon-1	20	6.00329e-73	0.7905	drosophila melanogaster rtnl1 transcript variant mrna	protein	nucl	nucl
THRIPS_11_08_2011_01565	Strong	30	16	0	0.570625	hecd1_mouse ame: full=e3 ubiquitin-protein ligase hectd1 ame: full=hect domain-containing protein 1 ame: full=protein open mind	20	0	0.884	bombus terrestris e3 ubiquitin-protein ligase hectd1-like mrna	protein	nucl	nucl
THRIPS_11_08_2011_01566	Strong	4	8	1.79819e-158	0.455	ipo4_human ame: full=importin-4 short=imp4 ame: full=importin-4b short=imp4b ame: full=ran-binding protein 4 short= 4	20	0	0.6435	apis mellifera importin-4-like mrna	protein	nucl	nucl
THRIPS_11_08_2011_01567	Weak	0	0			---NA---	0			---NA---	none
THRIPS_11_08_2011_01568	None	0	0			---NA---	0			---NA---	none
THRIPS_11_08_2011_01569	Good	20	20	3.95873e-23	0.4585	tacc2_human ame: full=transforming acidic coiled-coil-containing protein 2 ame: full=anti-zuai-1 short=azu-1	20	1.71048e-36	0.579	strongylocentrotus purpuratus hypothetical loc578030 mrna	protein	nucl	nucl
THRIPS_11_08_2011_01570	Strong	3	4	1.27266e-07	0.4925	kdm4d_rat ame: full=lysine-specific demethylase 4d ame: full= domain-containing histone demethylation protein 3d ame: full=jumonji domain-containing protein 2d	20	9.53268e-12	0.5315	oryctolagus cuniculus lysine -specific demethylase 4c-like mrna	protein	nucl	nucl
THRIPS_11_08_2011_01571	Weak	0	0			---NA---	1	9.29614e-06	0.6	mus musculus bac clone rp24-395k4 from chromosome complete sequence	uncertain	nucl only	nucl only
THRIPS_11_08_2011_01572	None	0	0			---NA---	0			---NA---	none
THRIPS_11_08_2011_01573	None	0	0			---NA---	0			---NA---	none
THRIPS_11_08_2011_01574	Weak	26	20	0	0.707	acadm_drome ame: full=probable medium-chain specific acyl- mitochondrial short=mcad flags: precursor	20	0	0.8935	tribolium castaneum cg12262 cg12262-pa mrna	protein	nucl	nucl
THRIPS_11_08_2011_01575	Good	9	20	1.34259e-67	0.493	myro1_brebr ame: full=myrosinase 1 ame: full=beta-glucosidase 1 ame: full=beta-thioglucosidase 1 ame: full=beta-thioglucosidase glucohydrolase 1 ame: full=sinigrinase 1 ame: full=thioglucosidase 1	20	4.32431e-62	0.607	tenebrio molitor beta-glucosidase partial cds	protein	prot	nucl
THRIPS_11_08_2011_01576	Good	24	20	1.38288e-67	0.674	if4e_xenla ame: full=eukaryotic translation initiation factor 4e short=eif-4e short=eif4e ame: full=eif-4f 25 kda subunit ame: full=mrna cap-binding protein	20	1.97262e-91	0.773	apis mellifera eukaryotic translation initiation factor 4e (eif-4e) mrna	protein	nucl	nucl
THRIPS_11_08_2011_01577	Weak	0	0			---NA---	0			---NA---	none
THRIPS_11_08_2011_01578	Weak	0	0			---NA---	0			---NA---	none
THRIPS_11_08_2011_01579	Strong	1	2	1.48794e-35	0.745	mbrl_human ame: full=membralin	20	5.12997e-78	0.805	apis mellifera membralin-like mrna	protein	nucl	nucl
THRIPS_11_08_2011_01580	Strong	4	2	2.95922e-06	0.7	4et_human ame: full=eukaryotic translation initiation factor 4e transporter short=4e-t short=eif4e transporter ame: full=eukaryotic translation initiation factor 4e nuclear import factor 1	10	3.8472e-25	0.666	pediculus humanus corporis eukaryotic translation initiation factor 4e mrna	protein	nucl	prot
THRIPS_11_08_2011_01581	Strong	5	20	1.17219e-110	0.5295	tbc15_mouse ame: full=tbc1 domain family member 15 ame: full=gtpase-activating protein rab7 short=gap for rab7 short=rab7-gap	20	1.66178e-174	0.727	bombus impatiens tbc1 domain family member 15-like mrna	protein	nucl	nucl
THRIPS_11_08_2011_01582	None	0	0			---NA---	0			---NA---	none
THRIPS_11_08_2011_01583	Good	2	20	3.64168e-39	0.584	nu1m_anoqu ame: full=nadh-ubiquinone oxidoreductase chain 1 ame: full=nadh dehydrogenase subunit 1	20	7.42331e-71	0.673	thrips imaginis complete genome	uncertain	nucl	nucl
THRIPS_11_08_2011_01584	Strong	9	6	5.02158e-18	0.535	xbp1_human ame: full=x-box-binding protein 1 short=xbp-1 ame: full=tax-responsive element-binding protein 5	20	3.27278e-25	0.7365	cricetulus griseus x-box binding protein 1 (xbp-1) transcript variant mrna	protein	nucl	nucl
THRIPS_11_08_2011_01585	Weak	0	0			---NA---	0			---NA---	none
THRIPS_11_08_2011_01586	Strong	66	20	0	0.811	ch60_drome ame: full=60 kda heat shock mitochondrial ame: full=60 kda chaperonin ame: full=cpn60 ame: full=heat shock protein 60 short=hsp-60 ame: full=hsp60 ame: full=mitochondrial matrix protein p1 flags: precursor	20	0	0.928	anopheles gambiae pest agap004002-pa complete cds	protein	nucl	nucl
THRIPS_11_08_2011_01587	Strong	2	9	4.65367e-45	0.605556	yipf1_mouse ame: full=protein yipf1 ame: full=yip1 family member 1	19	3.28097e-58	0.727895	tetraodon nigroviridis mrna for d05cjc protein	protein	nucl	nucl
THRIPS_11_08_2011_01588	Strong	12	20	0	0.4245	titin_drome ame: full=titin ame: full=d-titin ame: full=kettin	20	0	0.8755	tribolium castaneum bmkettin mrna	protein	nucl	nucl
THRIPS_11_08_2011_01589	Weak	0	0			---NA---	0			---NA---	none
THRIPS_11_08_2011_01590	Strong	24	20	3.00061e-124	0.7025	thim_bovin ame: full=3-ketoacyl- mitochondrial ame: full=acetyl- acyltransferase ame: full=beta-ketothiolase ame: full=mitochondrial 3-oxoacyl- thiolase	20	5.06283e-164	0.8135	apis mellifera acetyl-coa-c-acetyltransferase 2 mrna	protein	nucl	nucl
THRIPS_11_08_2011_01591	Good	2	19	6.27117e-29	0.522632	pol2_drome ame: full=retrovirus-related pol polyprotein from transposon 297 includes: ame: full=protease includes: ame: full=reverse transcriptase includes: ame: full=endonuclease	20	2.52369e-47	0.6845	strongylocentrotus purpuratus mrna	protein	nucl	nucl
THRIPS_11_08_2011_01592	None	0	0			---NA---	10	1.90139e-11	0.903	homo sapiens phosphatase and actin regulator 4 transcript variant mrna	protein	nucl only	nucl only
THRIPS_11_08_2011_01593	Strong	38	19	1.63965e-47	0.716316	s27a4_mouse ame: full=long-chain fatty acid transport protein 4 short=fatp-4 short=fatty acid transport protein 4 ame: full=solute carrier family 27 member 4	20	3.6836e-80	0.8675	drosophila melanogaster fatty acid (long chain) transport protein transcript variant mrna	protein	nucl	nucl
THRIPS_11_08_2011_01594	Strong	14	14	5.05584e-52	0.545714	srprb_rat ame: full=signal recognition particle receptor subunit beta short=sr-beta	20	1.91362e-65	0.731	tribolium castaneum signal recognition particle receptor beta subunit mrna	protein	nucl	nucl
THRIPS_11_08_2011_01595	Weak	8	5	2.04687e-07	0.696	sgsm3_human ame: full=small g protein signaling modulator 3 ame: full=merlin-associated protein ame: full=run and tbc1 domain-containing protein 3 ame: full=rab-gtpase-activating protein short=	20	3.06355e-22	0.811	nasonia vitripennis small g protein signaling modulator 3 homolog mrna	protein	nucl	nucl
THRIPS_11_08_2011_01596	Weak	0	0			---NA---	0			---NA---	none
THRIPS_11_08_2011_01597	Weak	0	0			---NA---	0			---NA---	none
THRIPS_11_08_2011_01598	Weak	0	1	3.64686e-07	0.73	hypothetical protein EAG_02381 [Camponotus floridanus]	0			---NA---	none	prot only	prot only
THRIPS_11_08_2011_01599	None	0	0			---NA---	0			---NA---	none
THRIPS_11_08_2011_01600	None	0	0			---NA---	0			---NA---	none
THRIPS_11_08_2011_01601	None	0	0			---NA---	0			---NA---	none
THRIPS_11_08_2011_01602	None	0	0			---NA---	0			---NA---	none
THRIPS_11_08_2011_01603	Strong	39	18	1.68411e-46	0.868889	ercc3_drome ame: full=dna excision repair protein haywire ame: full=atp-dependent dna helicase hay ame: full=ercc-3 homolog protein ame: full=ercc3dm	20	4.19244e-56	0.9715	culex quinquefasciatus tfiih basal transcription factor complex helicase xpb mrna	protein	nucl	nucl
THRIPS_11_08_2011_01604	None	0	0			---NA---	0			---NA---	none
THRIPS_11_08_2011_01605	None	0	0			---NA---	0			---NA---	none
THRIPS_11_08_2011_01606	None	0	0			---NA---	0			---NA---	none
THRIPS_11_08_2011_01607	Strong	30	20	7.78263e-141	0.7125	vps4b_bovin ame: full=vacuolar protein sorting-associated protein 4b	20	1.97925e-176	0.9145	aedes aegypti skd vacuolar sorting partial mrna	protein	nucl	nucl
THRIPS_11_08_2011_01608	None	0	0			---NA---	0			---NA---	none
THRIPS_11_08_2011_01609	Weak	0	0			---NA---	0			---NA---	none
THRIPS_11_08_2011_01610	None	6	1	4.23795e-08	0.63	transcriptional family	2	2.43596e-10	0.615	hyphomicrobium denitrificans atcc complete genome	uncertain	nucl	prot
THRIPS_11_08_2011_01611	Weak	0	0			---NA---	0			---NA---	none
THRIPS_11_08_2011_01612	None	0	0			---NA---	0			---NA---	none
THRIPS_11_08_2011_01613	Weak	0	0			---NA---	0			---NA---	none
THRIPS_11_08_2011_01614	Strong	9	20	1.80633e-11	0.564	prdm5_mouse ame: full=pr domain zinc finger protein 5 ame: full=pr domain-containing protein 5	20	8.55973e-14	0.551	zebrafish dna sequence from clone ch211-120g10 in linkage group complete sequence	uncertain	nucl	prot
THRIPS_11_08_2011_01615	None	0	0			---NA---	0			---NA---	none
THRIPS_11_08_2011_01617	Good	5	5	1.65638e-07	0.874	multidrug resistance-associated protein 1	16	1.6715e-09	0.86125	culex quinquefasciatus multidrug resistance-associated protein mrna	protein	nucl	prot
THRIPS_11_08_2011_01618	Weak	0	0			---NA---	0			---NA---	none
THRIPS_11_08_2011_01619	Good	1	0			---NA---	0			---NA---	none
THRIPS_11_08_2011_01620	Weak	0	0			---NA---	0			---NA---	none
THRIPS_11_08_2011_01621	Weak	0	0			---NA---	0			---NA---	none
THRIPS_11_08_2011_01622	Weak	0	0			---NA---	0			---NA---	none
THRIPS_11_08_2011_01623	None	0	0			---NA---	0			---NA---	none
THRIPS_11_08_2011_01624	None	0	0			---NA---	0			---NA---	none
THRIPS_11_08_2011_01625	Weak	0	0			---NA---	0			---NA---	none
THRIPS_11_08_2011_01626	Weak	0	0			---NA---	0			---NA---	none
THRIPS_11_08_2011_01627	Good	0	0			---NA---	0			---NA---	none
THRIPS_11_08_2011_01628	Weak	0	0			---NA---	0			---NA---	none
THRIPS_11_08_2011_01629	Weak	0	0			---NA---	0			---NA---	none
THRIPS_11_08_2011_01630	None	0	0			---NA---	0			---NA---	none
THRIPS_11_08_2011_01631	Weak	0	0			---NA---	0			---NA---	none
THRIPS_11_08_2011_01632	None	0	0			---NA---	0			---NA---	none
THRIPS_11_08_2011_01633	Weak	0	0			---NA---	0			---NA---	none
THRIPS_11_08_2011_01634	Good	5	7	1.41107e-24	0.724286	rgps1_danre ame: full=ras-specific guanine nucleotide-releasing factor 1 ame: full=ral gef with ph domain and sh3-binding motif 1 ame: full= exchange factor 1	20	3.47315e-44	0.8875	drosophila melanogaster cg5522 transcript variant mrna	protein	nucl	nucl
THRIPS_11_08_2011_01635	None	0	0			---NA---	0			---NA---	none
THRIPS_11_08_2011_01636	None	39	3	3.27159e-13	0.73	m3k1_rat ame: full=mitogen-activated protein kinase kinase kinase 1 ame: full=mapk erk kinase kinase 1 short=mek kinase 1 short=mekk 1	20	4.80579e-13	0.751	cricetulus griseus mitogen-activated protein kinase kinase kinase 1-like mrna	protein	prot	nucl
THRIPS_11_08_2011_01637	None	0	0			---NA---	0			---NA---	none
THRIPS_11_08_2011_01638	Weak	0	0			---NA---	0			---NA---	none
THRIPS_11_08_2011_01639	Strong	24	18	5.66651e-18	0.714444	twf2a_xenla ame: full=twinfilin-2-a	20	1.00584e-22	0.739	tribolium castaneum twinfilin mrna	protein	nucl	nucl
THRIPS_11_08_2011_01640	Good	0	0			---NA---	0			---NA---	none
THRIPS_11_08_2011_01641	None	0	0			---NA---	0			---NA---	none
THRIPS_11_08_2011_01642	Weak	0	0			---NA---	0			---NA---	none
THRIPS_11_08_2011_01643	None	0	0			---NA---	0			---NA---	none
THRIPS_11_08_2011_01644	Weak	0	0			---NA---	0			---NA---	none
THRIPS_11_08_2011_01645	None	0	0			---NA---	0			---NA---	none
THRIPS_11_08_2011_01646	Weak	0	0			---NA---	0			---NA---	none
THRIPS_11_08_2011_01647	None	0	0			---NA---	0			---NA---	none
THRIPS_11_08_2011_01648	Weak	0	0			---NA---	0			---NA---	none
THRIPS_11_08_2011_01649	None	0	0			---NA---	0			---NA---	none
THRIPS_11_08_2011_01650	Good	0	0			---NA---	5	1.13486e-10	0.74	bombus terrestris n-terminal kinase-like mrna	protein	nucl only	nucl only
THRIPS_11_08_2011_01651	None	1	10	4.77852e-15	0.655	denn domain-containing	14	3.23705e-14	0.868571	tribolium castaneum agap009774-pa mrna	protein	prot	nucl
THRIPS_11_08_2011_01652	None	0	0			---NA---	0			---NA---	none
THRIPS_11_08_2011_01653	None	0	0			---NA---	0			---NA---	none
THRIPS_11_08_2011_01654	None	0	0			---NA---	0			---NA---	none
THRIPS_11_08_2011_01655	None	0	0			---NA---	0			---NA---	none
THRIPS_11_08_2011_01656	Weak	0	0			---NA---	0			---NA---	none
THRIPS_11_08_2011_01657	Good	14	20	1.72964e-35	0.7295	spt4h_drome ame: full=transcription elongation factor spt4 ame: full=drb sensitivity-inducing factor small subunit short=dsif small subunit ame: full=dspt4	20	2.52975e-45	0.8975	acyrthosiphon pisum transcription elongation factor spt4-like mrna	protein	nucl	nucl
THRIPS_11_08_2011_01658	Weak	0	0			---NA---	0			---NA---	none
THRIPS_11_08_2011_01659	None	0	0			---NA---	0			---NA---	none
THRIPS_11_08_2011_01660	None	0	0			---NA---	0			---NA---	none
THRIPS_11_08_2011_01661	None	0	0			---NA---	0			---NA---	none
THRIPS_11_08_2011_01662	Weak	0	0			---NA---	0			---NA---	none
THRIPS_11_08_2011_01663	None	0	0			---NA---	0			---NA---	none
THRIPS_11_08_2011_01664	Strong	27	20	5.41461e-45	0.6985	cdc27_bovin ame: full=cell division cycle protein 27 homolog	20	2.15208e-53	0.9075	oreochromis niloticus cell division cycle protein 27 homolog miscrna	protein	nucl	nucl
THRIPS_11_08_2011_01665	Good	8	4	3.46188e-23	0.705	spt6h_drome ame: full=transcription elongation factor spt6	20	3.21411e-33	0.789	bombus impatiens transcription elongation factor spt6-like mrna	protein	nucl	nucl
THRIPS_11_08_2011_01666	Weak	0	0			---NA---	0			---NA---	none
THRIPS_11_08_2011_01667	Strong	28	8	2.55134e-18	0.79	med12_drome ame: full=mediator of rna polymerase ii transcription subunit 12 ame: full=mediator complex subunit 12 ame: full=mediator complex subunit kohtalo ame: full=dtrap230	20	1.38089e-34	0.891	pediculus humanus corporis mediator of rna polymerase ii transcription mrna	protein	nucl	nucl
THRIPS_11_08_2011_01668	None	0	0			---NA---	0			---NA---	none
THRIPS_11_08_2011_01669	Good	32	2	4.51144e-07	0.71	nipbl_mouse ame: full=nipped-b-like protein ame: full=delangin homolog ame: full=scc2 homolog	9	1.12459e-21	0.796667	apis mellifera nipped-b protein (nipped-b) mrna	protein	nucl	nucl
THRIPS_11_08_2011_01670	None	0	0			---NA---	0			---NA---	none
THRIPS_11_08_2011_01671	Good	3	3	8.28701e-09	0.83	cp033_bovin ame: full=u11 u12 small nuclear ribonucleoprotein 25 kda protein short=u11 u12 snrnp 25 kda protein	20	4.5792e-17	0.802	pediculus humanus corporis u11 u12 snrnp 25 kda mrna	protein	nucl	prot
THRIPS_11_08_2011_01672	Weak	0	0			---NA---	0			---NA---	none
THRIPS_11_08_2011_01673	Weak	0	0			---NA---	0			---NA---	none
THRIPS_11_08_2011_01674	None	0	0			---NA---	0			---NA---	none
THRIPS_11_08_2011_01675	Weak	0	0			---NA---	0			---NA---	none
THRIPS_11_08_2011_01676	None	0	0			---NA---	3	7.62102e-08	0.56	nasonia vitripennis dna-directed rna polymerase i subunit rpa43-like mrna	protein	nucl only	nucl only
THRIPS_11_08_2011_01677	Weak	0	0			---NA---	0			---NA---	none
THRIPS_11_08_2011_01678	None	0	0			---NA---	0			---NA---	none
THRIPS_11_08_2011_01679	Good	1	4	3.28096e-08	0.5775	dna repair transcription protein met18	2	8.81873e-06	0.645	pediculus humanus corporis dna repair transcription protein met18 mrna	protein	prot	nucl
THRIPS_11_08_2011_01680	Weak	0	2	1.77407e-06	0.52	rna u small nuclear rna export adapter protein	1	7.01537e-06	0.62	tribolium castaneum phosphorylated adaptor for rna mrna	protein	prot	nucl
THRIPS_11_08_2011_01681	None	0	0			---NA---	0			---NA---	none
THRIPS_11_08_2011_01682	Strong	51	12	2.08665e-20	0.698333	ikka_chick ame: full=inhibitor of nuclear factor kappa-b kinase subunit alpha short=i kappa-b kinase alpha short=ikk-a short=ikk-alpha short= short= kinase ame: full=conserved helix-loop-helix ubiquitous kinase ame: full=nuclear factor nf-kappa-b inhibitor kinase alpha short=nfkbika	20	4.33637e-26	0.7575	litopenaeus vannamei ikkbeta complete cds	protein	nucl	nucl
THRIPS_11_08_2011_01683	None	0	0			---NA---	0			---NA---	none
THRIPS_11_08_2011_01684	None	0	0			---NA---	0			---NA---	none
THRIPS_11_08_2011_01685	Weak	0	0			---NA---	0			---NA---	none
THRIPS_11_08_2011_01686	None	0	0			---NA---	0			---NA---	none
THRIPS_11_08_2011_01687	None	0	0			---NA---	0			---NA---	none
THRIPS_11_08_2011_01688	None	1	20	9.97923e-29	0.7005	cell wall-associated hydrolase	20	2.11578e-52	0.9205	uncultured bacterium clone f5k2q4c04j453j 23s ribosomal rna partial sequence	bacterial	nucl	nucl
THRIPS_11_08_2011_01689	Weak	0	4	2.31208e-06	0.6525	hypothetical protein AaeL_AAEL001201 [Aedes aegypti]	3	1.89398e-07	0.69	aedes aegypti clone bac complete sequence	uncertain	nucl	nucl
THRIPS_11_08_2011_01690	None	0	0			---NA---	0			---NA---	none
THRIPS_11_08_2011_01691	Weak	0	0			---NA---	0			---NA---	none
THRIPS_11_08_2011_01692	Weak	0	0			---NA---	0			---NA---	none
THRIPS_11_08_2011_01693	Weak	0	0			---NA---	0			---NA---	none
THRIPS_11_08_2011_01694	Weak	0	0			---NA---	0			---NA---	none
THRIPS_11_08_2011_01695	Weak	0	0			---NA---	0			---NA---	none
THRIPS_11_08_2011_01696	None	0	0			---NA---	0			---NA---	none
THRIPS_11_08_2011_01697	None	0	0			---NA---	0			---NA---	none
THRIPS_11_08_2011_01698	None	0	0			---NA---	0			---NA---	none
THRIPS_11_08_2011_01699	None	0	0			---NA---	0			---NA---	none
THRIPS_11_08_2011_01700	None	0	0			---NA---	0			---NA---	none
THRIPS_11_08_2011_01701	None	0	0			---NA---	0			---NA---	none
THRIPS_11_08_2011_01702	Weak	0	0			---NA---	0			---NA---	none
THRIPS_11_08_2011_01703	None	0	0			---NA---	0			---NA---	none
THRIPS_11_08_2011_01704	None	0	0			---NA---	0			---NA---	none
THRIPS_11_08_2011_01705	Weak	0	0			---NA---	0			---NA---	none
THRIPS_11_08_2011_01706	Good	18	20	4.18055e-117	0.442	fnd3a_human ame: full=fibronectin type-iii domain-containing protein 3a ame: full=human gene expressed in odontoblasts	20	0	0.6325	drosophila melanogaster cg42389 transcript variant mrna	protein	nucl	nucl
THRIPS_11_08_2011_01707	Good	18	20	4.23447e-117	0.442	fnd3a_human ame: full=fibronectin type-iii domain-containing protein 3a ame: full=human gene expressed in odontoblasts	20	0	0.619	drosophila melanogaster cg42389 transcript variant mrna	protein	nucl	nucl
THRIPS_11_08_2011_01708	Good	18	20	4.23639e-117	0.442	fnd3a_human ame: full=fibronectin type-iii domain-containing protein 3a ame: full=human gene expressed in odontoblasts	20	0	0.6145	drosophila melanogaster cg42389 transcript variant mrna	protein	nucl	nucl
THRIPS_11_08_2011_01709	None	0	0			---NA---	0			---NA---	none
THRIPS_11_08_2011_01710	Strong	6	20	1.18797e-16	0.7665	tyrosine-protein phosphatase non-receptor	20	1.72929e-20	0.774	tribolium castaneum ip14232p mrna	protein	nucl	nucl
THRIPS_11_08_2011_01711	Weak	0	0			---NA---	0			---NA---	none
THRIPS_11_08_2011_01712	Weak	17	18	5.44703e-52	0.513333	amph_chick ame: full=amphiphysin	20	0	0.875	nasonia vitripennis myc box-dependent-interacting protein 1- transcript variant 1 mrna	protein	nucl	nucl
THRIPS_11_08_2011_01713	Strong	16	7	7.30592e-12	0.574286	bin1_human ame: full=myc box-dependent-interacting protein 1 ame: full=amphiphysin ii ame: full=amphiphysin-like protein ame: full=box-dependent myc-interacting protein 1 ame: full=bridging integrator 1	20	1.5062e-51	0.9125	tribolium castaneum bridging integrator mrna	protein	nucl	nucl
THRIPS_11_08_2011_01714	Weak	17	18	5.49948e-52	0.513333	amph_chick ame: full=amphiphysin	20	3.37573e-178	0.87	bombus terrestris amphiphysin- transcript variant 1 mrna	protein	nucl	nucl
THRIPS_11_08_2011_01715	Weak	17	18	5.37585e-52	0.513333	amph_chick ame: full=amphiphysin	20	0	0.87	nasonia vitripennis myc box-dependent-interacting protein 1- transcript variant 1 mrna	protein	nucl	nucl
THRIPS_11_08_2011_01716	None	0	1	9.29e-116	0.86	predicted protein [Populus trichocarpa]	20	4.71377e-139	0.937	populus trichocarpa mrna	protein	nucl	nucl
THRIPS_11_08_2011_01717	None	0	0			---NA---	0			---NA---	none
THRIPS_11_08_2011_01718	Weak	0	0			---NA---	0			---NA---	none
THRIPS_11_08_2011_01719	Good	2	4	5.23011e-11	0.3975	vas1_bovin ame: full=v-type proton atpase subunit s1 short=v-atpase subunit s1 ame: full=v-atpase ac45 subunit ame: full=v-atpase s1 accessory protein ame: full=vacuolar proton pump subunit s1 flags: precursor	20	8.67802e-34	0.67	tribolium castaneum vacuolar atp synthase subunit s1 mrna	protein	nucl	nucl
THRIPS_11_08_2011_01720	None	0	0			---NA---	0			---NA---	none
THRIPS_11_08_2011_01721	Weak	4	15	2.60441e-24	0.452	ycp9_schpo ame: full=uncharacterized oxidoreductase	20	1.2712e-52	0.699	drosophila ananassae gf19520 (dana\gf19520) mrna	protein	nucl	nucl
THRIPS_11_08_2011_01722	None	7	20	8.14674e-28	0.4785	ycp6_schpo ame: full=uncharacterized oxidoreductase	20	3.94915e-66	0.655	drosophila ananassae gf19520 (dana\gf19520) mrna	protein	nucl	nucl
THRIPS_11_08_2011_01723	Strong	17	20	1.11081e-101	0.5455	tfcp2_xentr ame: full=transcription factor cp2	20	1.66726e-147	0.869	drosophila melanogaster gemini transcript variant mrna	protein	nucl	nucl
THRIPS_11_08_2011_01724	Strong	17	20	1.46679e-101	0.5455	tfcp2_xentr ame: full=transcription factor cp2	20	3.10982e-149	0.869	drosophila melanogaster gemini transcript variant mrna	protein	nucl	nucl
THRIPS_11_08_2011_01725	Strong	2	4	8.44512e-102	0.48	immt_drome ame: full= mitochondrial inner membrane protein	20	2.26174e-108	0.6785	nasonia vitripennis mitochondrial inner membrane transcript variant 2 mrna	protein	nucl	nucl
THRIPS_11_08_2011_01726	Strong	13	20	0	0.6625	erf3a_human ame: full=eukaryotic peptide chain release factor gtp-binding subunit erf3a short=eukaryotic peptide chain release factor subunit 3a short=erf3a ame: full=g1 to s phase transition protein 1 homolog	20	0	0.927	pediculus humanus corporis eukaryotic peptide chain release factor gtp-binding mrna	protein	nucl	nucl
THRIPS_11_08_2011_01727	Weak	13	20	0	0.6625	erf3a_human ame: full=eukaryotic peptide chain release factor gtp-binding subunit erf3a short=eukaryotic peptide chain release factor subunit 3a short=erf3a ame: full=g1 to s phase transition protein 1 homolog	20	0	0.927	pediculus humanus corporis eukaryotic peptide chain release factor gtp-binding mrna	protein	nucl	nucl
THRIPS_11_08_2011_01728	None	0	0			---NA---	0			---NA---	none
THRIPS_11_08_2011_01729	Weak	0	0			---NA---	0			---NA---	none
THRIPS_11_08_2011_01730	Strong	11	20	9.11041e-136	0.6045	syvn1_mouse ame: full=e3 ubiquitin-protein ligase synoviolin ame: full=synovial apoptosis inhibitor 1 flags: precursor	20	1.42956e-180	0.866	tribolium castaneum synoviolin mrna	protein	nucl	nucl
THRIPS_11_08_2011_01731	None	0	0			---NA---	0			---NA---	none
THRIPS_11_08_2011_01732	Weak	7	20	7.28459e-28	0.726	senescence-associated protein	20	4.1227e-89	0.829	encephalitozoon intestinalis atcc 50506 chromosome complete sequence	uncertain	nucl	nucl
THRIPS_11_08_2011_01733	Strong	10	20	0	0.5165	sc24c_human ame: full=protein transport protein sec24c ame: full=sec24-related protein c	20	0	0.8415	strongylocentrotus purpuratus sec24 related gene member c ( cerevisiae) mrna	protein	nucl	nucl
THRIPS_11_08_2011_01734	Weak	0	0			---NA---	0			---NA---	none
THRIPS_11_08_2011_01735	Weak	0	1	3.9018e-06	0.75	yr554_mimiv ame: full=uncharacterized protein r554	3	4.65912e-06	0.75	acanthamoeba polyphaga complete genome	uncertain	prot	nucl
THRIPS_11_08_2011_01736	None	0	0			---NA---	0			---NA---	none
THRIPS_11_08_2011_01737	None	0	0			---NA---	0			---NA---	none
THRIPS_11_08_2011_01738	Weak	0	0			---NA---	0			---NA---	none
THRIPS_11_08_2011_01739	Strong	10	20	1.63798e-83	0.528	mmp14_human ame: full=matrix metalloproteinase-14 short=mmp-14 ame: full=mmp-x1 ame: full=membrane-type matrix metalloproteinase 1 short=mt-mmp 1 short=mtmmp1 ame: full=membrane-type-1 matrix metalloproteinase short=mt1-mmp short=mt1mmp flags: precursor	20	0	0.8175	drosophila melanogaster matrix metalloproteinase 1 transcript variant mrna	protein	nucl	nucl
THRIPS_11_08_2011_01740	Good	26	20	0	0.9945	act1_drome ame: full=actin-5c	20	0	0.9955	aedes aegypti actin partial mrna	protein	nucl	nucl
THRIPS_11_08_2011_01741	Weak	0	0			---NA---	0			---NA---	none
THRIPS_11_08_2011_01742	Weak	0	0			---NA---	0			---NA---	none
THRIPS_11_08_2011_01743	Weak	0	0			---NA---	0			---NA---	none
THRIPS_11_08_2011_01744	Weak	0	0			---NA---	0			---NA---	none
THRIPS_11_08_2011_01745	Weak	10	20	0	0.5825	y1727_drome ame: full=tbc1 domain family member cg11727	20	0	0.878	drosophila melanogaster cg11727 transcript variant mrna	protein	nucl	nucl
THRIPS_11_08_2011_01746	Weak	10	20	0	0.582	y1727_drome ame: full=tbc1 domain family member cg11727	20	0	0.865	drosophila melanogaster cg11727 transcript variant mrna	protein	nucl	nucl
THRIPS_11_08_2011_01747	None	0	0			---NA---	0			---NA---	none
THRIPS_11_08_2011_01748	Weak	0	0			---NA---	0			---NA---	none
THRIPS_11_08_2011_01749	Strong	3	20	3.31406e-10	0.4825	pol4_drome ame: full=retrovirus-related pol polyprotein from transposon 412 includes: ame: full=protease includes: ame: full=reverse transcriptase includes: ame: full=endonuclease	20	4.45841e-19	0.6165	schistosoma mansoni strain puerto rico chromosome complete genome	uncertain	nucl	nucl
THRIPS_11_08_2011_01750	Weak	0	0			---NA---	0			---NA---	none
THRIPS_11_08_2011_01751	Strong	32	20	0	0.59	sptca_drome ame: full=spectrin alpha chain	20	0	0.914	pediculus humanus corporis spectrin alpha mrna	protein	nucl	nucl
THRIPS_11_08_2011_01752	Strong	30	12	1.84981e-61	0.6	nfat5_human ame: full=nuclear factor of activated t-cells 5 short=nf-at5 ame: full=t-cell transcription factor nfat5 ame: full=tonicity-responsive enhancer-binding protein short= -binding protein short=	20	6.46041e-125	0.881	drosophila melanogaster nfat homolog transcript variant mrna	protein	nucl	nucl
THRIPS_11_08_2011_01753	Weak	0	1	4.22859e-25	0.66	ssp4_drome ame: full=short spindle protein 4	20	5.45484e-25	0.705	drosophila melanogaster short spindle 4 transcript variant mrna	protein	prot	nucl
THRIPS_11_08_2011_01754	Weak	0	0			---NA---	0			---NA---	none
THRIPS_11_08_2011_01755	Strong	22	20	0	0.783	k6pf_drome ame: full=6-phosphofructokinase short=phosphofructokinase ame: full=phosphohexokinase	20	0	0.886	drosophila melanogaster phosphofructokinase transcript variant mrna	protein	nucl	nucl
THRIPS_11_08_2011_01756	Strong	19	3	1.69133e-08	0.77	bat3_human ame: full=large proline-rich protein bat3 ame: full=hla-b-associated transcript 3 ame: full=protein g3	20	2.04757e-17	0.749	saccoglossus kowalevskii hla-b-associated transcript 3-like partial mrna	protein	nucl	prot
THRIPS_11_08_2011_01757	Strong	19	3	1.81728e-08	0.77	bat3_human ame: full=large proline-rich protein bat3 ame: full=hla-b-associated transcript 3 ame: full=protein g3	20	2.12626e-17	0.7465	saccoglossus kowalevskii hla-b-associated transcript 3-like partial mrna	protein	nucl	prot
THRIPS_11_08_2011_01758	Good	3	20	0	0.9755	act_manse ame: full= muscle	20	0	0.9685	apis mellifera clone 205- transcript variant 1 mrna	protein	nucl	prot
THRIPS_11_08_2011_01759	Weak	3	20	0	0.979	act2_bommo ame: full= muscle-type a2	20	0	0.9755	apis mellifera clone 205- transcript variant 1 mrna	protein	nucl	prot
THRIPS_11_08_2011_01760	Weak	0	0			---NA---	0			---NA---	none
THRIPS_11_08_2011_01762	Weak	73	20	1.49161e-156	0.7125	calr_bommo ame: full=calreticulin flags: precursor	20	0	0.911	bombyx mori calreticulin complete cds	protein	nucl	nucl
THRIPS_11_08_2011_01763	Weak	73	20	7.11397e-161	0.762	calr_bommo ame: full=calreticulin flags: precursor	20	0	0.877	bombyx mori calreticulin complete cds	protein	nucl	nucl
THRIPS_11_08_2011_01764	Weak	0	0			---NA---	0			---NA---	none
THRIPS_11_08_2011_01765	Weak	0	0			---NA---	0			---NA---	none
THRIPS_11_08_2011_01766	None	0	5	8.4815e-17	0.69	conserved hypothetical protein [Paracoccidioides brasiliensis Pb18]	20	8.78578e-82	0.9415	alternaria tenuissima isolate ch1 28s ribosomal rna partial sequence 28s-18s ribosomal rna intergenic complete sequence and 18s ribosomal rna partial sequence	rRNA	nucl	nucl
THRIPS_11_08_2011_01767	None	0	9	3.88561e-14	0.718889	senescence-associated protein	20	3.74838e-64	0.858	leptosphaeria maculans jn3 lm_ ontig_19_v2 genomic whole isolate	uncertain	nucl	nucl
THRIPS_11_08_2011_01768	None	0	0			---NA---	0			---NA---	none
THRIPS_11_08_2011_01769	Strong	9	20	2.51619e-60	0.5105	s12a9_danre ame: full=solute carrier family 12 member 9	20	2.58846e-119	0.8695	aedes aegypti cation chloride cotransporter partial mrna	protein	nucl	nucl
THRIPS_11_08_2011_01770	None	0	1	1.56625e-07	0.65	y114_chlmu ame: full=uncharacterized protein tc_0114	20	4.16088e-46	0.849	serratia complete genome	uncertain	nucl	nucl
THRIPS_11_08_2011_01771	None	0	0			---NA---	2	1.22686e-06	0.585	gasterosteus aculeatus clone cgx19-a03 mrna sequence	protein	nucl only	nucl only
THRIPS_11_08_2011_01772	None	0	1	5.48775e-07	0.61	hypothetical protein [Ophiocordyceps unilateralis]	10	6.66702e-67	0.699	encephalitozoon intestinalis atcc 50506 chromosome complete sequence	uncertain	nucl	nucl
THRIPS_11_08_2011_01773	None	5	4	7.17036e-41	0.5675	gidrp_mouse ame: full=growth inhibition and differentiation-related protein 88 homolog	20	2.52493e-75	0.836	drosophila melanogaster cg2162 transcript variant mrna	protein	nucl	nucl
THRIPS_11_08_2011_01774	Weak	0	0			---NA---	0			---NA---	none
THRIPS_11_08_2011_01775	Strong	3	20	2.57296e-08	0.5655	rpesp_bovin ame: full=rpe-spondin flags: precursor	20	9.22384e-21	0.7015	drosophila grimshawi gh22917 (dgri\gh22917) mrna	protein	nucl	nucl
THRIPS_11_08_2011_01776	Weak	0	0			---NA---	0			---NA---	none
THRIPS_11_08_2011_01777	Good	2	16	9.95302e-24	0.52	f-box lrr-repeat protein 7	8	6.30741e-24	0.6875	bombus terrestris hypothetical loc100648523 miscrna	miscrna	nucl	nucl
THRIPS_11_08_2011_01778	None	0	0			---NA---	0			---NA---	none
THRIPS_11_08_2011_01779	Strong	8	4	2.47474e-86	0.66	cnot4_human ame: full=ccr4-not transcription complex subunit 4 ame: full=ccr4-associated factor 4 ame: full=e3 ubiquitin-protein ligase cnot4 ame: full=potential transcriptional repressor not4hp	20	1.59768e-108	0.8815	drosophila melanogaster cg31716 transcript variant mrna	protein	nucl	nucl
THRIPS_11_08_2011_01780	Strong	18	20	0	0.9625	tbab_schco ame: full=tubulin alpha-1b chain	20	0	0.972	sus scrofa clone: expressed in mesenteric lymph node	uncertain	nucl	nucl
THRIPS_11_08_2011_01781	Weak	0	0			---NA---	0			---NA---	none
THRIPS_11_08_2011_01782	Weak	10	4	4.3239e-12	0.5425	tmx3_xenla ame: full=protein disulfide-isomerase tmx3 ame: full=thioredoxin domain-containing protein 10 ame: full=thioredoxin-related transmembrane protein 3 flags: precursor	20	2.09776e-57	0.757	tribolium castaneum agap005431-pa mrna	protein	nucl	nucl
THRIPS_11_08_2011_01783	Weak	0	0			---NA---	0			---NA---	none
THRIPS_11_08_2011_01784	None	7	6	2.7763e-82	0.731667	faaa_human ame: full=fumarylacetoacetase short=faa ame: full=beta-diketonase ame: full=fumarylacetoacetate hydrolase	20	4.62379e-111	0.823	synthetic construct homo sapiens clone fumarylacetoacetate hydrolase partial cds	protein	nucl	nucl
THRIPS_11_08_2011_01785	None	9	3	2.39341e-06	0.726667	qcr10_bovin ame: full=cytochrome b-c1 complex subunit 10 ame: full=complex iii subunit 10 ame: full=complex iii subunit xi ame: full=ubiquinol-cytochrome c reductase complex kda protein	20	3.98529e-10	0.824	tetraodon nigroviridis full-length cdna	cDNA	nucl	nucl
THRIPS_11_08_2011_01786	Weak	0	0			---NA---	0			---NA---	none
THRIPS_11_08_2011_01787	Weak	0	0			---NA---	0			---NA---	none
THRIPS_11_08_2011_01788	Weak	0	0			---NA---	0			---NA---	none
THRIPS_11_08_2011_01789	Good	5	7	3.75489e-28	0.511429	atpk_drome ame: full= atp synthase subunit mitochondrial	20	2.88359e-35	0.629	drosophila melanogaster cg4692 transcript variant mrna	protein	nucl	nucl
THRIPS_11_08_2011_01790	Weak	0	1	2.77757e-07	0.72	predicted protein [Populus trichocarpa]	5	7.39452e-17	0.702	zebrafish dna sequence from clone ch211-261d9 in linkage group complete sequence	uncertain	nucl	prot
THRIPS_11_08_2011_01791	Weak	0	1	2.61821e-07	0.72	predicted protein [Populus trichocarpa]	7	3.29434e-20	0.744286	gallus gallus bac clone: 77c10 and mhc from wla homozygote chicken	uncertain	nucl	nucl
THRIPS_11_08_2011_01792	None	0	0			---NA---	0			---NA---	none
THRIPS_11_08_2011_01793	Good	1	4	2.31674e-14	0.6375	fop_mouse ame: full=friend of prmt1 protein	20	9.2509e-20	0.89	sus scrofa chromatin target of prmt1 mrna	protein	nucl	nucl
THRIPS_11_08_2011_01794	Good	1	20	2.89868e-33	0.547	glycerol-3-phosphate acyltransferase	16	7.63043e-30	0.5975	culex quinquefasciatus glycerol-3-phosphate mrna	protein	prot	nucl
THRIPS_11_08_2011_01795	Good	2	15	4.1956e-107	0.546	tt39b_xentr ame: full=tetratricopeptide repeat protein 39b short=tpr repeat protein 39b	20	0	0.735	tribolium castaneum tpr repeat-containing protein c9orf52 mrna	protein	nucl	nucl
THRIPS_11_08_2011_01796	None	0	0			---NA---	0			---NA---	none
THRIPS_11_08_2011_01797	Strong	3	7	3.29682e-67	0.585714	lin1_nycco ame: full=line-1 reverse transcriptase homolog	20	6.54757e-113	0.9405	homo sapiens chromosome clone rp11- complete sequence	uncertain	nucl	nucl
THRIPS_11_08_2011_01798	None	0	0			---NA---	0			---NA---	none
THRIPS_11_08_2011_01799	Weak	0	0			---NA---	0			---NA---	none
THRIPS_11_08_2011_01800	None	0	0			---NA---	7	5.29559e-07	0.727143	strongylocentrotus purpuratus hypothetical loc584854 partial mrna	protein	nucl only	nucl only
THRIPS_11_08_2011_01801	Weak	3	20	5.14806e-167	0.5895	hyou1_xenla ame: full=hypoxia up-regulated protein 1 flags: precursor	20	0	0.7965	tribolium castaneum agap001827-pa mrna	protein	nucl	nucl
THRIPS_11_08_2011_01802	Weak	0	0			---NA---	0			---NA---	none
THRIPS_11_08_2011_01803	Good	11	8	1.96133e-40	0.74625	tom20_xenla ame: full=mitochondrial import receptor subunit tom20 homolog ame: full=mitochondrial 20 kda outer membrane protein ame: full=outer mitochondrial membrane receptor tom20	20	1.36198e-44	0.8335	tribolium castaneum mitochondrial import receptor subunit tom20 mrna	protein	nucl	nucl
THRIPS_11_08_2011_01804	None	0	0			---NA---	0			---NA---	none
THRIPS_11_08_2011_01805	None	0	0			---NA---	0			---NA---	none
THRIPS_11_08_2011_01806	Weak	0	4	6.63025e-13	0.6375	cg11791- isoform a	4	8.82655e-12	0.7525	tribolium castaneum agap002461-pa mrna	protein	prot	nucl
THRIPS_11_08_2011_01807	Good	8	3	4.70489e-12	0.806667	arip4_xentr ame: full=helicase arip4 ame: full=androgen receptor-interacting protein 4 ame: full=rad54-like protein 2	20	2.09148e-18	0.819	culex quinquefasciatus steroid receptor-interacting snf2 domain mrna	protein	nucl	nucl
THRIPS_11_08_2011_01808	Good	9	20	8.61264e-49	0.4305	polg_rtsvt ame: full=genome polyprotein contains: ame: full= leader protein contains: ame: full=capsid protein 1 short=cp-1 ame: full= kda protein ame: full=coat protein 1 contains: ame: full=capsid protein 2 short=cp-2 ame: full=26 kda protein ame: full=coat protein 2 contains: ame: full=capsid protein 3 short=cp-3 ame: full=31 kda protein ame: full=coat protein 3 contains: ame: full= helicase a…	20	7.46984e-141	0.6015	deformed wing virus isolate vdv-1-dwv-no- complete genome	virus	nucl	nucl
THRIPS_11_08_2011_01809	Good	20	20	2.42388e-29	0.586	aamp_bovin ame: full=angio-associated migratory cell protein	20	7.14337e-38	0.698	strongylocentrotus purpuratus loc495692 protein mrna	protein	nucl	nucl
THRIPS_11_08_2011_01810	None	0	0			---NA---	0			---NA---	none
THRIPS_11_08_2011_01811	Weak	0	0			---NA---	5	1.43294e-11	0.722	zebrafish dna sequence from clone dkey-9p20 in linkage group 4 contains twelve novel genes and seven complete sequence	uncertain	nucl only	nucl only
THRIPS_11_08_2011_01812	Strong	3	20	9.34435e-20	0.5835	zn836_human ame: full=zinc finger protein 836	20	7.15729e-60	0.702	lotus japonicus clone: 3-049- htc	uncertain	nucl	nucl
THRIPS_11_08_2011_01813	Weak	0	0			---NA---	0			---NA---	none
THRIPS_11_08_2011_01814	Weak	0	0			---NA---	0			---NA---	none
THRIPS_11_08_2011_01815	None	0	0			---NA---	0			---NA---	none
THRIPS_11_08_2011_01816	None	0	0			---NA---	0			---NA---	none
THRIPS_11_08_2011_01817	None	0	0			---NA---	0			---NA---	none
THRIPS_11_08_2011_01818	Weak	0	0			---NA---	0			---NA---	none
THRIPS_11_08_2011_01819	None	3	8	6.99705e-11	0.54125	PREDICTED: hypothetical protein [Nasonia vitripennis]	4	1.21106e-08	0.585	cotesia sesamiae kitale bracovirus clone bac complete sequence	virus	prot	nucl
THRIPS_11_08_2011_01820	Weak	0	0			---NA---	0			---NA---	none
THRIPS_11_08_2011_01821	Good	4	5	0	0.512	poe_drome ame: full=protein purity of essence ame: full=interaction calmodulin and colossal molecular mass protein ame: full=protein calossin ame: full=protein pushover	20	0	0.7815	pediculus humanus corporis protein purity of mrna	protein	nucl	nucl
THRIPS_11_08_2011_01823	Weak	0	0			---NA---	0			---NA---	none
THRIPS_11_08_2011_01824	None	0	0			---NA---	0			---NA---	none
THRIPS_11_08_2011_01825	None	0	0			---NA---	0			---NA---	none
THRIPS_11_08_2011_01826	Weak	0	0			---NA---	0			---NA---	none
THRIPS_11_08_2011_01827	Weak	0	0			---NA---	0			---NA---	none
THRIPS_11_08_2011_01828	Weak	0	0			---NA---	0			---NA---	none
THRIPS_11_08_2011_01829	Weak	0	0			---NA---	1	7.80438e-15	0.72	populus trichocarpa mrna	protein	nucl only	nucl only
THRIPS_11_08_2011_01830	None	0	0			---NA---	0			---NA---	none
THRIPS_11_08_2011_01831	Strong	32	20	7.42858e-26	0.7115	kelc_anost ame: full=ring canal kelch homolog ame: full=kelch-like protein 1 contains: ame: full=kelch short protein	20	3.36027e-31	0.8625	bombus impatiens ring canal kelch homolog mrna	protein	nucl	nucl
THRIPS_11_08_2011_01832	None	0	0			---NA---	0			---NA---	none
THRIPS_11_08_2011_01833	Good	13	5	3.07842e-24	0.626	sos_drome ame: full=protein son of sevenless	20	6.17277e-38	0.74	acyrthosiphon pisum protein son of sevenless-like mrna	protein	nucl	nucl
THRIPS_11_08_2011_01834	None	0	0			---NA---	0			---NA---	none
THRIPS_11_08_2011_01835	None	0	0			---NA---	0			---NA---	none
THRIPS_11_08_2011_01836	Weak	0	0			---NA---	0			---NA---	none
THRIPS_11_08_2011_01837	Strong	25	9	1.19595e-15	0.686667	hip1_mouse ame: full=huntingtin-interacting protein 1 short=hip-1 ame: full=huntingtin-interacting protein i short=hip-i	20	1.51639e-22	0.817	apis mellifera huntingtin interacting protein 1 mrna	protein	nucl	nucl
THRIPS_11_08_2011_01838	Weak	20	20	4.01849e-82	0.848	ndus8_macfa ame: full=nadh dehydrogenase iron-sulfur protein mitochondrial ame: full=complex i-23kd short=ci-23kd ame: full=nadh-ubiquinone oxidoreductase 23 kda subunit flags: precursor	20	6.07872e-99	0.841	tetraodon nigroviridis full-length cdna	cDNA	nucl	prot
THRIPS_11_08_2011_01839	Good	14	8	1.13014e-51	0.6925	nbea_drome ame: full=neurobeachin ame: full=a-kinase anchor protein 550 short=akap 550 ame: full=protein rugose ame: full=dakap550	20	3.61094e-71	0.9675	drosophila melanogaster rugose transcript variant mrna	protein	nucl	nucl
THRIPS_11_08_2011_01840	Weak	0	0			---NA---	0			---NA---	none
THRIPS_11_08_2011_01841	Weak	0	0			---NA---	0			---NA---	none
THRIPS_11_08_2011_01842	Weak	0	0			---NA---	0			---NA---	none
THRIPS_11_08_2011_01843	Weak	27	10	7.18879e-15	0.808	rs6_manse ame: full=40s ribosomal protein s6	20	7.76451e-28	0.884	bombus impatiens 40s ribosomal protein s6-like mrna	protein	nucl	nucl
THRIPS_11_08_2011_01844	Strong	23	20	5.9179e-39	0.6745	kgua_mouse ame: full=guanylate kinase ame: full=gmp kinase	20	6.6331e-55	0.869	nasonia vitripennis guanylate kinase- transcript variant 1 mrna	protein	nucl	nucl
THRIPS_11_08_2011_01845	None	0	0			---NA---	0			---NA---	none
THRIPS_11_08_2011_01846	None	4	3	1.10333e-27	0.763333	60s ribosomal protein l4	7	1.21497e-33	0.74	chromosome viii of strain gb-m1 of encephalitozoon cuniculi	uncertain	nucl	prot
THRIPS_11_08_2011_01847	Strong	12	20	1.04382e-52	0.6005	grhpr_human ame: full=glyoxylate reductase hydroxypyruvate reductase	20	1.53645e-67	0.6915	strongylocentrotus purpuratus si:ch211- mrna	protein	nucl	nucl
THRIPS_11_08_2011_01848	Good	9	4	4.21423e-13	0.48	sgt1_drome ame: full=protein sgt1 homolog ecdysoneless	1	1.49427e-10	0.61	drosophila willistoni gk12519 (dwil\gk12519) mrna	protein	prot	nucl
THRIPS_11_08_2011_01849	None	0	0			---NA---	0			---NA---	none
THRIPS_11_08_2011_01850	Weak	0	0			---NA---	0			---NA---	none
THRIPS_11_08_2011_01851	Weak	4	5	3.92982e-09	0.58	probable rna helicase armi	2	1.20994e-08	0.72	Pediculus humanus corporis hypothetical protein, mRNA	protein	prot	nucl
THRIPS_11_08_2011_01852	None	0	0			---NA---	0			---NA---	none
THRIPS_11_08_2011_01853	None	0	0			---NA---	0			---NA---	none
THRIPS_11_08_2011_01854	Good	5	5	6.94706e-23	0.696	ssrb_canfa ame: full=translocon-associated protein subunit beta short=trap-beta ame: full=glycoprotein 25h short=gp25h ame: full=signal sequence receptor subunit beta short=ssr-beta flags: precursor	20	3.28899e-35	0.794	maconellicoccus hirsutus clone whmh4449 signal sequence receptor beta subunit complete cds	protein	nucl	nucl
THRIPS_11_08_2011_01855	Strong	11	4	4.44518e-12	0.4675	ulk2_mouse ame: full=serine threonine-protein kinase ulk2 ame: full=serine threonine-protein kinase ame: full=unc-51-like kinase 2	15	3.19087e-16	0.720667	tribolium castaneum cg10967-pa mrna	protein	nucl	nucl
THRIPS_11_08_2011_01856	Strong	9	10	4.49056e-23	0.546	taf3_mouse ame: full=transcription initiation factor tfiid subunit 3 ame: full=140 kda tata box-binding protein-associated factor ame: full=tbp-associated factor 3 ame: full=transcription initiation factor tfiid 140 kda subunit short=taf 140 short=taf140 short=tafii-140 short=tafii140	20	1.54393e-33	0.7075	strongylocentrotus purpuratus tafii140 protein mrna	protein	nucl	nucl
THRIPS_11_08_2011_01857	Weak	2	3	1.08127e-19	0.51	swp1_encin ame: full=spore wall protein 1 flags: precursor	9	2.91078e-18	0.574444	encephalitozoon intestinalis atcc 50506 chromosome complete sequence	uncertain	prot	nucl
THRIPS_11_08_2011_01858	Strong	2	20	1.63754e-44	0.7565	isoform a	20	2.98345e-46	0.7895	drosophila melanogaster cg12065 transcript variant mrna	protein	nucl	nucl
THRIPS_11_08_2011_01859	Weak	0	0			---NA---	0			---NA---	none
THRIPS_11_08_2011_01860	Weak	0	0			---NA---	0			---NA---	none
THRIPS_11_08_2011_01861	None	0	0			---NA---	0			---NA---	none
THRIPS_11_08_2011_01862	Weak	0	0			---NA---	0			---NA---	none
THRIPS_11_08_2011_01863	Good	5	7	4.11264e-06	0.465714	GL10144 [Drosophila persimilis]	0			---NA---	none	prot only	prot only
THRIPS_11_08_2011_01864	Strong	10	20	2.45804e-69	0.633	tb10b_mouse ame: full=tbc1 domain family member 10b ame: full=protein wz3-85	20	5.08767e-105	0.8175	nasonia vitripennis tbc1 domain family member 10b-like mrna	protein	nucl	nucl
THRIPS_11_08_2011_01865	Strong	20	7	8.42325e-13	0.628571	bat3_mouse ame: full=large proline-rich protein bat3 ame: full=hla-b-associated transcript 3	20	3.53863e-20	0.7675	strongylocentrotus purpuratus hla-b-associated transcript 3 mrna	protein	nucl	nucl
THRIPS_11_08_2011_01866	Good	24	20	4.02446e-91	0.799	arl1_drome ame: full=adp-ribosylation factor-like protein 1	20	9.01819e-111	0.9585	apis mellifera arflike at 72a transcript variant 1 mrna	protein	nucl	nucl
THRIPS_11_08_2011_01867	Weak	20	20	0	0.714	ap2m1_chick ame: full=ap-2 complex subunit mu-1 ame: full=ap-2 mu-2 chain ame: full=clathrin assembly protein complex 2 medium chain ame: full=clathrin coat assembly protein ap50 ame: full=clathrin coat-associated protein ap50 ame: full=ha2 50 kda subunit ame: full=mu2-adaptin ame: full=plasma membrane adaptor ap-2 50 kda protein	20	0	0.9775	drosophila melanogaster ap-50 (ap-50) transcript variant mrna	protein	nucl	nucl
THRIPS_11_08_2011_01868	Strong	21	20	2.78321e-81	0.6565	ub2j2_mouse ame: full=ubiquitin-conjugating enzyme e2 j2 ame: full=non-canonical ubiquitin-conjugating enzyme 2 short=ncube-2	20	1.86167e-166	0.707	drosophila melanogaster pten-induced kinase 1 transcript variant mrna	protein	nucl	nucl
THRIPS_11_08_2011_01869	Weak	19	20	1.22006e-71	0.5475	dpp4_pig ame: full=dipeptidyl peptidase 4 ame: full=dipeptidyl peptidase iv short=dpp iv ame: full=t-cell activation antigen cd26 ame: cd_antigen=cd26 contains: ame: full=dipeptidyl peptidase 4 membrane form ame: full=dipeptidyl peptidase iv membrane form contains: ame: full=dipeptidyl peptidase 4 soluble form ame: full=dipeptidyl peptidase iv soluble form	20	4.13319e-138	0.756	drosophila melanogaster omega transcript variant mrna	protein	nucl	nucl
THRIPS_11_08_2011_01870	Strong	20	20	7.54683e-164	0.6985	mig15_caeel ame: full=serine threonine-protein kinase mig-15 ame: full=abnormal cell migration protein 15	20	0	0.9675	drosophila melanogaster misshapen transcript variant mrna	protein	nucl	nucl
THRIPS_11_08_2011_01871	None	0	2	1.3986e-06	0.8	conserved hypothetical protein [Pediculus humanus corporis]	8	2.3963e-11	0.775	blattella germanica 18s ribosomal rna partial sequence internal transcribed spacer ribosomal rna internal transcribed spacer and 28s ribosomal rna complete sequence and intergenic spacer and external transcribed spacer regions	rRNA	nucl	prot
THRIPS_11_08_2011_01872	Strong	5	8	2.74729e-45	0.64	co024_danre ame: full=upf0480 protein c15orf24 homolog flags: precursor	20	2.68611e-86	0.7905	aedes aegypti actin binding protein partial mrna	protein	nucl	nucl
THRIPS_11_08_2011_01873	Strong	2	6	0	0.526667	dmxl2_human ame: full= -like protein 2 ame: full=rabconnectin-3	20	0	0.875	pediculus humanus corporis mrna	protein	nucl	nucl
THRIPS_11_08_2011_01874	Strong	4	4	4.84561e-14	0.51	pairb_human ame: full=plasminogen activator inhibitor 1 rna-binding protein ame: full=pai1 rna-binding protein 1 short=pai-rbp1 ame: full=serpine1 mrna-binding protein 1	20	1.47726e-43	0.8925	pediculus humanus corporis plasminogen activator inhibitor 1 rna-binding mrna	protein	nucl	nucl
THRIPS_11_08_2011_01875	Weak	0	0			---NA---	5	7.02234e-10	0.748	bryopsis hypnoides complete genome	uncertain	nucl only	nucl only
THRIPS_11_08_2011_01876	Weak	0	0			---NA---	0			---NA---	none
THRIPS_11_08_2011_01877	Weak	0	0			---NA---	0			---NA---	none
THRIPS_11_08_2011_01878	Strong	25	20	1.29386e-61	0.434	pard3_human ame: full=partitioning defective 3 homolog short=par-3 short=pard-3 ame: full=atypical pkc isotype-specific-interacting protein short=asip ame: full=ctcl tumor antigen se2-5 ame: full=par3-alpha	20	0	0.8315	drosophila melanogaster bazooka transcript variant mrna	protein	nucl	nucl
THRIPS_11_08_2011_01879	None	0	0			---NA---	0			---NA---	none
THRIPS_11_08_2011_01880	Strong	22	20	1.7369e-135	0.874	adt1_anoga ame: full= carrier protein 1 ame: full=adp atp translocase 1 ame: full=adenine nucleotide translocator 1 short=ant 1	20	3.34921e-160	0.8885	drosophila melanogaster stress-sensitive b transcript variant mrna	protein	nucl	nucl
THRIPS_11_08_2011_01881	None	0	0			---NA---	0			---NA---	none
THRIPS_11_08_2011_01882	Strong	11	20	0	0.572	sc24b_human ame: full=protein transport protein sec24b ame: full=sec24-related protein b	20	0	0.82	bombus terrestris protein transport protein sec24b-like mrna	protein	nucl	nucl
THRIPS_11_08_2011_01883	Good	8	20	8.34849e-53	0.4765	cytsa_danre ame: full=cytospin-a-a ame: full=specc1-like protein	20	9.1897e-154	0.768	aedes aegypti paramyosin partial mrna	protein	nucl	nucl
THRIPS_11_08_2011_01884	Weak	8	20	1.98456e-31	0.6005	homeodomain-interacting protein kinase 2	5	6.83978e-17	0.812	acyrthosiphon pisum homeodomain-interacting protein kinase 2- transcript variant 2 mrna	protein	prot	nucl
THRIPS_11_08_2011_01885	Strong	10	20	0	0.5155	sc24c_human ame: full=protein transport protein sec24c ame: full=sec24-related protein c	20	0	0.8415	strongylocentrotus purpuratus sec24 related gene member c ( cerevisiae) mrna	protein	nucl	nucl
THRIPS_11_08_2011_01886	None	0	0			---NA---	0			---NA---	none
THRIPS_11_08_2011_01887	Strong	13	20	5.22484e-75	0.5855	epn2_rat ame: full=epsin-2 ame: full=eps-15-interacting protein 2	20	1.21875e-122	0.866	drosophila melanogaster liquid facets transcript variant mrna	protein	nucl	nucl
THRIPS_11_08_2011_01888	Strong	26	20	3.21712e-158	0.792	f26_ranca ame: full=6-phosphofructo-2-kinase fructose- -biphosphatase short=6pf-2-k fru- -p2ase short=pfk fbpase ame: full=6pf-2-k fru- -p2ase liver muscle isozymes includes: ame: full=6-phosphofructo-2-kinase includes: ame: full=fructose- -bisphosphatase	20	0	0.889	aedes aegypti 6-phosphofructo-2-kinase fructose- -bisphosphatase short form partial mrna	protein	nucl	nucl
THRIPS_11_08_2011_01889	Strong	15	20	7.81614e-83	0.506	mll3_human ame: full=histone-lysine n-methyltransferase mll3 ame: full=homologous to alr protein ame: full=lysine n-methyltransferase 2c short=kmt2c ame: full=myeloid lymphoid or mixed-lineage leukemia protein 3	20	0	0.8385	tribolium castaneum misc_rna miscrna	miscrna	nucl	nucl
THRIPS_11_08_2011_01890	Strong	19	20	2.31172e-94	0.5295	txnd5_mouse ame: full=thioredoxin domain-containing protein 5 ame: full=endoplasmic reticulum resident protein 46 short=er protein 46 short=erp46 ame: full=plasma cell-specific thioredoxin-related protein short=pc-trp ame: full=thioredoxin-like protein p46 flags: precursor	20	3.57129e-140	0.774	strongylocentrotus purpuratus thioredoxin domain-containing protein 5 precursor (thioredoxin-like protein p46) (endoplasmic reticulum protein erp46) (plasma cell-specific thioredoxin-related protein) (pc-trp) mrna	protein	nucl	nucl
THRIPS_11_08_2011_01891	Weak	0	0			---NA---	0			---NA---	none
THRIPS_11_08_2011_01892	Weak	10	6	7.0986e-09	0.396667	aim21_klula ame: full=altered inheritance of mitochondria protein 21	0			---NA---	none	prot only	prot only
THRIPS_11_08_2011_01893	Good	11	20	1.36366e-98	0.884	erd2_drome ame: full=er lumen protein retaining receptor	20	2.5041e-125	0.9295	aedes aegypti er lumen protein retaining receptor partial mrna	protein	nucl	nucl
THRIPS_11_08_2011_01894	Weak	0	0			---NA---	0			---NA---	none
THRIPS_11_08_2011_01895	None	0	0			---NA---	0			---NA---	none
THRIPS_11_08_2011_01896	None	0	4	1.28661e-10	0.7275	cytochrome p450-like tbp protein	20	2.25881e-34	0.9115	colletotrichum cereale isolate pa-50005 clone genomic sequence	uncertain	nucl	nucl
THRIPS_11_08_2011_01897	Weak	0	0			---NA---	0			---NA---	none
THRIPS_11_08_2011_01898	Strong	8	20	6.18013e-59	0.5925	mppa_mouse ame: full=mitochondrial-processing peptidase subunit alpha ame: full=alpha-mpp ame: full=p-55 flags: precursor	20	2.32398e-80	0.7795	aedes aegypti mitochondrial processing peptidase alpha subunit partial mrna	protein	nucl	nucl
THRIPS_11_08_2011_01899	Weak	0	2	3.26976e-16	0.86	hypothetical protein ECU11_1800 [Encephalitozoon cuniculi GB-M1]	4	3.36442e-20	0.86	chromosome xi of strain gb-m1 of encephalitozoon cuniculi	uncertain	nucl	nucl
THRIPS_11_08_2011_01900	Strong	3	5	5.79296e-29	0.502	ubp30_xentr ame: full=ubiquitin carboxyl-terminal hydrolase 30 ame: full=deubiquitinating enzyme 30 ame: full=ubiquitin thiolesterase 30 ame: full=ubiquitin-specific-processing protease 30 short=ub-specific protease 30	20	1.92504e-34	0.6915	pediculus humanus corporis ubiquitin-specific mrna	protein	nucl	nucl
THRIPS_11_08_2011_01901	None	0	0			---NA---	0			---NA---	none
THRIPS_11_08_2011_01902	None	0	0			---NA---	0			---NA---	none
THRIPS_11_08_2011_01903	Strong	6	14	2.06826e-28	0.812857	hot_aedae ame: full=probable hydroxyacid-oxoacid mitochondrial short=hot flags: precursor	20	2.74978e-35	0.8635	culex quinquefasciatus nad-dependent methanol mrna	protein	nucl	nucl
THRIPS_11_08_2011_01904	None	0	0			---NA---	0			---NA---	none
THRIPS_11_08_2011_01905	Weak	0	0			---NA---	0			---NA---	none
THRIPS_11_08_2011_01906	Weak	0	0			---NA---	0			---NA---	none
THRIPS_11_08_2011_01908	Strong	25	17	2.03526e-23	0.811176	gmds_drome ame: full=gdp-mannose dehydratase ame: full=gdp-d-mannose dehydratase short=dm-gmd	20	1.78172e-28	0.916	culex quinquefasciatus gdp-mannose mrna	protein	nucl	nucl
THRIPS_11_08_2011_01909	Strong	7	5	2.87925e-24	0.484	dag1_bovin ame: full=dystroglycan ame: full=dystrophin-associated glycoprotein 1 contains: ame: full=alpha-dystroglycan short=alpha-dg contains: ame: full=beta-dystroglycan short=beta-dg flags: precursor	20	2.87248e-65	0.796	apis mellifera dystroglycan-like mrna	protein	nucl	nucl
THRIPS_11_08_2011_01910	None	0	0			---NA---	0			---NA---	none
THRIPS_11_08_2011_01911	None	0	0			---NA---	0			---NA---	none
THRIPS_11_08_2011_01912	Weak	0	0			---NA---	0			---NA---	none
THRIPS_11_08_2011_01913	None	1	5	4.69398e-24	0.602	tbl3_bovin ame: full=transducin beta-like protein 3	20	2.55974e-44	0.6995	tribolium castaneum transducin beta-like 3 mrna	protein	nucl	nucl
THRIPS_11_08_2011_01915	None	0	0			---NA---	0			---NA---	none
THRIPS_11_08_2011_01916	Weak	0	0			---NA---	0			---NA---	none
THRIPS_11_08_2011_01917	None	13	12	5.02466e-14	0.7825	rnc_caeel ame: full=ribonuclease 3 ame: full=protein drosher ame: full=ribonuclease iii short=rnase iii	20	1.52063e-22	0.955	tribolium castaneum ribonuclease iii mrna	protein	nucl	nucl
THRIPS_11_08_2011_01918	None	0	0			---NA---	0			---NA---	none
THRIPS_11_08_2011_01919	None	0	0			---NA---	0			---NA---	none
THRIPS_11_08_2011_01920	Weak	0	0			---NA---	0			---NA---	none
THRIPS_11_08_2011_01921	Weak	0	3	4.7974e-08	0.68	host cell factor	0			---NA---	none	prot only	prot only
THRIPS_11_08_2011_01922	Strong	19	20	1.45464e-120	0.747	my61f_drome ame: full=myosin-ib short=mib ame: full=brush border myosin ib short=bbmib	20	3.87109e-152	0.84	drosophila melanogaster myosin 61f transcript variant mrna	protein	nucl	nucl
THRIPS_11_08_2011_01923	None	0	0			---NA---	0			---NA---	none
THRIPS_11_08_2011_01925	Weak	0	0			---NA---	0			---NA---	none
THRIPS_11_08_2011_01926	None	0	0			---NA---	0			---NA---	none
THRIPS_11_08_2011_01927	None	0	0			---NA---	0			---NA---	none
THRIPS_11_08_2011_01928	Strong	53	20	0	0.531	lrp2_rat ame: full=low-density lipoprotein receptor-related protein 2 short=lrp-2 ame: full=glycoprotein 330 short=gp330 ame: full=megalin flags: precursor	20	0	0.8685	pediculus humanus corporis low-density lipoprotein mrna	protein	nucl	nucl
THRIPS_11_08_2011_01929	None	0	0			---NA---	0			---NA---	none
THRIPS_11_08_2011_01932	None	0	0			---NA---	0			---NA---	none
THRIPS_11_08_2011_01933	Strong	5	2	1.38071e-09	0.57	utp20_human ame: full=small subunit processome component 20 homolog ame: full=down-regulated in metastasis protein ame: full=novel nucleolar protein 73 short=nnp73 ame: full=protein key-1a6	20	1.04088e-36	0.636	tribolium castaneum cg4554 cg4554-pa mrna	protein	nucl	nucl
THRIPS_11_08_2011_01934	None	0	0			---NA---	0			---NA---	none
THRIPS_11_08_2011_01935	Weak	0	0			---NA---	0			---NA---	none
THRIPS_11_08_2011_01936	Strong	2	5	2.07489e-11	0.536	k0141_human ame: full=uncharacterized protein mitochondrial flags: precursor	20	3.37419e-25	0.5715	strongylocentrotus purpuratus sel1 domain containing protein rgd735029 partial mrna	protein	nucl	nucl
THRIPS_11_08_2011_01937	Weak	0	0			---NA---	0			---NA---	none
THRIPS_11_08_2011_01938	None	0	0			---NA---	0			---NA---	none
THRIPS_11_08_2011_01939	Weak	0	0			---NA---	0			---NA---	none
THRIPS_11_08_2011_01940	Strong	6	2	3.40557e-07	0.62	k1797_human ame: full=uncharacterized protein kiaa1797	2	1.32933e-07	0.7	monodelphis domestica uncharacterized protein kiaa1797-like mrna	protein	nucl	nucl
THRIPS_11_08_2011_01941	Weak	0	0			---NA---	0			---NA---	none
THRIPS_11_08_2011_01942	None	0	0			---NA---	0			---NA---	none
THRIPS_11_08_2011_01943	Strong	13	5	3.40366e-24	0.766	ccar1_human ame: full=cell division cycle and apoptosis regulator protein 1 ame: full=cell cycle and apoptosis regulatory protein 1 short=carp-1 ame: full=death inducer with sap domain	20	1.02219e-53	0.8775	tribolium castaneum cell-cycle and apoptosis regulatory protein 1 mrna	protein	nucl	nucl
THRIPS_11_08_2011_01944	Weak	0	0			---NA---	0			---NA---	none
THRIPS_11_08_2011_01945	None	0	0			---NA---	0			---NA---	none
THRIPS_11_08_2011_01946	None	2	20	6.51432e-109	0.9105	probable g-protein coupled receptor 158	20	1.07404e-130	0.912	drosophila melanogaster cg31195 mrna	protein	nucl	nucl
THRIPS_11_08_2011_01947	None	0	0			---NA---	0			---NA---	none
THRIPS_11_08_2011_01948	None	0	0			---NA---	0			---NA---	none
THRIPS_11_08_2011_01949	Strong	30	5	1.27392e-17	0.752	ada10_mouse ame: full=disintegrin and metalloproteinase domain-containing protein 10 short=adam 10 ame: full=kuzbanian protein homolog ame: full=mammalian disintegrin-metalloprotease ame: cd_antigen=cd156c flags: precursor	20	8.46941e-37	0.961	drosophila melanogaster kuzbanian transcript variant mrna	protein	nucl	nucl
THRIPS_11_08_2011_01950	None	0	0			---NA---	0			---NA---	none
THRIPS_11_08_2011_01951	Weak	0	0			---NA---	0			---NA---	none
THRIPS_11_08_2011_01953	Weak	0	0			---NA---	0			---NA---	none
THRIPS_11_08_2011_01954	Weak	0	0			---NA---	0			---NA---	none
THRIPS_11_08_2011_01955	Strong	11	6	2.23934e-22	0.728333	adas_human ame: full=alkyldihydroxyacetonephosphate peroxisomal short=alkyl-dhap synthase ame: full=aging-associated gene 5 protein ame: full=alkylglycerone-phosphate synthase flags: precursor	20	7.26139e-33	0.7975	pediculus humanus corporis mrna	protein	nucl	nucl
THRIPS_11_08_2011_01956	Strong	6	11	1.08169e-16	0.708182	adck3_human ame: full=chaperone activity of bc1 complex- mitochondrial short=chaperone-abc1-like ame: full=aarf domain-containing protein kinase 3 flags: precursor	20	6.34566e-32	0.869	nasonia vitripennis chaperone activity of bc1 complex- mitochondrial-like mrna	protein	nucl	nucl
THRIPS_11_08_2011_01957	Weak	0	0			---NA---	0			---NA---	none
THRIPS_11_08_2011_01958	Weak	0	0			---NA---	1	6.69738e-06	0.76	anolis carolinensis kn motif and ankyrin repeat domains 1 mrna	protein	nucl only	nucl only
THRIPS_11_08_2011_01959	Weak	0	0			---NA---	0			---NA---	none
THRIPS_11_08_2011_01960	Weak	0	0			---NA---	0			---NA---	none
THRIPS_11_08_2011_01961	None	0	0			---NA---	0			---NA---	none
THRIPS_11_08_2011_01962	None	0	0			---NA---	0			---NA---	none
THRIPS_11_08_2011_01963	Weak	0	0			---NA---	0			---NA---	none
THRIPS_11_08_2011_01964	Strong	21	20	1.81635e-85	0.6805	rpa1_drome ame: full=dna-directed rna polymerase i subunit rpa1 short=rna polymerase i subunit a1 ame: full=dna-directed rna polymerase i largest subunit ame: full=dna-directed rna polymerase i subunit a	20	1.03686e-106	0.846	bombus impatiens dna-directed rna polymerase i subunit rpa1-like mrna	protein	nucl	nucl
THRIPS_11_08_2011_01965	Weak	0	0			---NA---	0			---NA---	none
THRIPS_11_08_2011_01966	Weak	0	0			---NA---	0			---NA---	none
THRIPS_11_08_2011_01967	Strong	24	20	1.19348e-155	0.538	chdm_drome ame: full=chromodomain-helicase-dna-binding protein mi-2 homolog ame: full=atp-dependent helicase mi-2 short=dmi-2	20	0	0.8945	drosophila melanogaster mi-2 (mi-2) transcript variant mrna	protein	nucl	nucl
THRIPS_11_08_2011_01968	Weak	0	0			---NA---	0			---NA---	none
THRIPS_11_08_2011_01969	Strong	5	6	3.24527e-24	0.681667	ptn9_mouse ame: full=tyrosine-protein phosphatase non-receptor type 9 ame: full=protein-tyrosine phosphatase meg2 short=ptpase meg2	20	4.83249e-73	0.932	drosophila melanogaster lethal g0232 (l g0232) transcript variant mrna	protein	nucl	nucl
THRIPS_11_08_2011_01970	Strong	19	20	7.50824e-94	0.6085	pkhf2_chick ame: full=pleckstrin homology domain-containing family f member 2 short=ph domain-containing family f member 2	20	2.22701e-126	0.8825	tribolium castaneum fyve finger containing protein mrna	protein	nucl	nucl
THRIPS_11_08_2011_01971	Weak	8	14	4.23639e-21	0.903571	zfpl1_nemve ame: full=zinc finger 1 homolog	20	6.93345e-26	0.935	bombyx mori clone: fphe18p13	uncertain	nucl	nucl
THRIPS_11_08_2011_01972	Good	2	0			---NA---	0			---NA---	none
THRIPS_11_08_2011_01973	Weak	0	0			---NA---	0			---NA---	none
THRIPS_11_08_2011_01974	Strong	3	1	2.08617e-06	0.51	ptf1a_human ame: full=pancreas transcription factor 1 subunit alpha ame: full=class a basic helix-loop-helix protein 29 short=bhlha29 ame: full=pancreas-specific transcription factor 1a ame: full=bhlh transcription factor p48 ame: full=p48 dna-binding subunit of transcription factor ptf1 short=ptf1-p48	20	3.72272e-18	0.6835	drosophila melanogaster salivary gland-expressed bhlh transcript variant mrna	protein	nucl	nucl
THRIPS_11_08_2011_01975	None	0	0			---NA---	0			---NA---	none
THRIPS_11_08_2011_01976	Weak	8	20	3.25624e-21	0.738	srrt_aedae ame: full=serrate rna effector molecule homolog ame: full=arsenite-resistance protein 2 homolog	20	3.44376e-29	0.8145	aedes aegypti arsenite-resistance protein partial mrna	protein	nucl	nucl
THRIPS_11_08_2011_01977	Weak	0	0			---NA---	0			---NA---	none
THRIPS_11_08_2011_01978	Strong	2	4	2.19984e-22	0.5925	cn166_mouse ame: full=upf0568 protein c14orf166 homolog	20	1.41166e-26	0.6045	bombyx mori clone: mfb-18p14	uncertain	nucl	nucl
THRIPS_11_08_2011_01979	None	0	0			---NA---	0			---NA---	none
THRIPS_11_08_2011_01980	Strong	6	20	1.25512e-124	0.8275	ddx18_drome ame: full=probable atp-dependent rna helicase pitchoune	20	6.89384e-154	0.9165	drosophila melanogaster pitchoune transcript variant mrna	protein	nucl	nucl
THRIPS_11_08_2011_01981	None	0	0			---NA---	0			---NA---	none
THRIPS_11_08_2011_01982	Weak	0	0			---NA---	0			---NA---	none
THRIPS_11_08_2011_01983	Weak	0	0			---NA---	0			---NA---	none
THRIPS_11_08_2011_01984	Weak	0	0			---NA---	0			---NA---	none
THRIPS_11_08_2011_01985	None	0	0			---NA---	0			---NA---	none
THRIPS_11_08_2011_01986	Weak	0	0			---NA---	0			---NA---	none
THRIPS_11_08_2011_01987	Weak	0	0			---NA---	0			---NA---	none
THRIPS_11_08_2011_01988	None	0	0			---NA---	0			---NA---	none
THRIPS_11_08_2011_01989	Strong	3	5	3.14951e-57	0.634	krh2_drome ame: full=protein kr-h2	20	9.80491e-96	0.7695	pediculus humanus corporis protein kr- mrna	protein	nucl	nucl
THRIPS_11_08_2011_01990	Strong	12	20	7.57185e-21	0.5115	ampe_bovin ame: full=glutamyl aminopeptidase short=eap ame: full=aminopeptidase a short=ap-a ame: cd_antigen=cd249	20	5.5879e-17	0.57	nasonia vitripennis aminopeptidase n-like mrna	protein	prot	nucl
THRIPS_11_08_2011_01991	Weak	0	0			---NA---	0			---NA---	none
THRIPS_11_08_2011_01992	None	0	0			---NA---	0			---NA---	none
THRIPS_11_08_2011_01993	Weak	0	0			---NA---	0			---NA---	none
THRIPS_11_08_2011_01994	None	0	0			---NA---	0			---NA---	none
THRIPS_11_08_2011_01995	Weak	0	0			---NA---	0			---NA---	none
THRIPS_11_08_2011_01996	Weak	0	0			---NA---	0			---NA---	none
THRIPS_11_08_2011_01997	Strong	4	2	1.10327e-06	0.67	ci046_human ame: full=transmembrane protein c9orf46	20	1.9446e-19	0.7125	tribolium castaneum cg13404 cg13404-pa mrna	protein	nucl	nucl
THRIPS_11_08_2011_01998	Strong	1	20	7.0787e-11	0.6775	aldo-keto reductase	16	9.37658e-14	0.709375	tribolium castaneum aldo-keto reductase mrna	protein	nucl	nucl
THRIPS_11_08_2011_01999	Good	7	9	2.16133e-25	0.638889	efr3_drome ame: full=protein efr3 homolog cmp44e ame: full=conserved membrane protein at 44e ame: full=protein stambha a	20	8.3694e-34	0.8715	drosophila melanogaster stambha a transcript variant mrna	protein	nucl	nucl
THRIPS_11_08_2011_02000	Weak	0	0			---NA---	0			---NA---	none
THRIPS_11_08_2011_02001	Good	3	20	1.14049e-18	0.569	rspb_ecoli ame: full=starvation-sensing protein rspb	20	1.18082e-36	0.6415	tribolium castaneum zinc-containing alcohol dehydrogenase mrna	protein	nucl	nucl
THRIPS_11_08_2011_02002	None	0	0			---NA---	0			---NA---	none
THRIPS_11_08_2011_02003	Weak	0	0			---NA---	1	9.91084e-07	0.61	pediculus humanus corporis gpi inositol deacylase mrna	protein	nucl only	nucl only
THRIPS_11_08_2011_02004	Weak	0	0			---NA---	0			---NA---	none
THRIPS_11_08_2011_02005	Weak	0	0			---NA---	0			---NA---	none
THRIPS_11_08_2011_02006	Good	14	11	1.39823e-24	0.722727	itpk1_chick ame: full=inositol-tetrakisphosphate 1-kinase ame: full=inositol -trisphosphate 5 6-kinase short=inositol-triphosphate 5 6-kinase short=ins( )p 5 6-kinase	20	2.18934e-27	0.8335	synthetic construct homo sapiens clone inositol 134-triphosphate 5 6 kinase partial cds	protein	nucl	nucl
THRIPS_11_08_2011_02007	Weak	0	0			---NA---	0			---NA---	none
THRIPS_11_08_2011_02008	Weak	0	0			---NA---	0			---NA---	none
THRIPS_11_08_2011_02009	Good	10	6	6.63966e-79	0.61	usp9x_mouse ame: full=probable ubiquitin carboxyl-terminal hydrolase faf-x ame: full=deubiquitinating enzyme faf-x ame: full=fat facets homolog ame: full=fat facets x-linked ame: full=ubiquitin carboxyl-terminal hydrolase fam ame: full=ubiquitin thiolesterase faf-x ame: full=ubiquitin-specific protease x chromosome ame: full=ubiquitin-specific-processing protease faf-x	20	8.53965e-108	0.8135	pediculus humanus corporis ubiquitin specific protease 9 mrna	protein	nucl	nucl
THRIPS_11_08_2011_02010	None	0	0			---NA---	0			---NA---	none
THRIPS_11_08_2011_02011	Weak	0	0			---NA---	0			---NA---	none
THRIPS_11_08_2011_02012	Strong	12	20	8.13253e-17	0.8775	rl27a_tenmo ame: full=60s ribosomal protein l27a	18	1.83363e-23	0.94	euphydryas aurinia ribosomal protein l27a complete cds	protein	nucl	nucl
THRIPS_11_08_2011_02013	None	0	0			---NA---	0			---NA---	none
THRIPS_11_08_2011_02014	None	0	0			---NA---	0			---NA---	none
THRIPS_11_08_2011_02015	Weak	0	0			---NA---	0			---NA---	none
THRIPS_11_08_2011_02016	None	0	1	7.64069e-06	0.4	mdn1_dicdi ame: full=midasin ame: full=midas-containing protein	20	6.19123e-32	0.682	tribolium castaneum agap011875-pa mrna	protein	nucl	nucl
THRIPS_11_08_2011_02017	Good	56	3	1.72175e-14	0.75	nf1_rat ame: full=neurofibromin ame: full=neurofibromatosis-related protein nf-1	20	1.52099e-29	0.806	strongylocentrotus purpuratus gap-related protein mrna	protein	nucl	nucl
THRIPS_11_08_2011_02018	Weak	0	0			---NA---	0			---NA---	none
THRIPS_11_08_2011_02019	Strong	19	20	1.67796e-74	0.669	ubp20_bovin ame: full=ubiquitin carboxyl-terminal hydrolase 20 ame: full=deubiquitinating enzyme 20 ame: full=ubiquitin thiolesterase 20 ame: full=ubiquitin-specific-processing protease 20	20	2.35018e-104	0.854	bombus terrestris ubiquitin carboxyl-terminal hydrolase 20-like mrna	protein	nucl	nucl
THRIPS_11_08_2011_02020	None	0	0			---NA---	0			---NA---	none
THRIPS_11_08_2011_02021	Weak	0	0			---NA---	0			---NA---	none
THRIPS_11_08_2011_02022	Good	39	18	6.57928e-34	0.797222	ercc3_drome ame: full=dna excision repair protein haywire ame: full=atp-dependent dna helicase hay ame: full=ercc-3 homolog protein ame: full=ercc3dm	20	4.39092e-38	0.8685	drosophila melanogaster haywire transcript variant mrna	protein	nucl	nucl
THRIPS_11_08_2011_02023	None	0	0			---NA---	0			---NA---	none
THRIPS_11_08_2011_02024	Weak	0	0			---NA---	0			---NA---	none
THRIPS_11_08_2011_02025	None	13	9	6.77196e-11	0.777778	fxl20_mouse ame: full=f-box lrr-repeat protein 20 ame: full=f-box and leucine-rich repeat protein 20 ame: full=f-box lrr-repeat protein 2-like	20	1.02838e-16	0.8265	nasonia vitripennis f-box lrr-repeat protein 20- transcript variant 1 mrna	protein	nucl	nucl
THRIPS_11_08_2011_02026	None	0	0			---NA---	0			---NA---	none
THRIPS_11_08_2011_02027	None	0	0			---NA---	0			---NA---	none
THRIPS_11_08_2011_02028	Strong	5	17	1.3159e-32	0.508235	mk67i_xentr ame: full=mki67 fha domain-interacting nucleolar phospho	20	3.79397e-37	0.758	bombus terrestris mki67 fha domain-interacting nucleolar phospho miscrna	protein	nucl	nucl
THRIPS_11_08_2011_02029	Weak	0	0			---NA---	0			---NA---	none
THRIPS_11_08_2011_02030	Weak	0	0			---NA---	0			---NA---	none
THRIPS_11_08_2011_02031	Strong	3	8	3.38586e-79	0.70625	atbd4_danre ame: full=atp-binding domain-containing protein 4	20	9.7079e-116	0.837	acyrthosiphon pisum meiotically up-regulated gene 71 mrna	protein	nucl	nucl
THRIPS_11_08_2011_02032	None	0	0			---NA---	0			---NA---	none
THRIPS_11_08_2011_02033	Weak	0	0			---NA---	0			---NA---	none
THRIPS_11_08_2011_02034	Strong	1	1	1.00601e-30	0.91	tutl_drome ame: full=protein turtle	20	4.29331e-37	0.9095	drosophila melanogaster turtle transcript variant mrna	protein	nucl	prot
THRIPS_11_08_2011_02035	Strong	29	7	3.42473e-07	0.551429	traf6_bovin ame: full=tnf receptor-associated factor 6 ame: full=e3 ubiquitin-protein ligase traf6	20	1.44731e-13	0.56	bombyx mori traf6 complete cds	protein	nucl	nucl
THRIPS_11_08_2011_02036	None	0	0			---NA---	0			---NA---	none
THRIPS_11_08_2011_02037	Strong	47	20	1.62153e-163	0.6495	ptp10_drome ame: full=tyrosine-protein phosphatase 10d ame: full=receptor-linked protein-tyrosine phosphatase 10d short=dptp10d flags: precursor	20	0	0.9065	drosophila melanogaster protein tyrosine phosphatase 10d transcript variant mrna	protein	nucl	nucl
THRIPS_11_08_2011_02038	Good	4	2	7.28306e-11	0.52	ttc3_human ame: full=e3 ubiquitin-protein ligase ttc3 ame: full=protein dcrr1 ame: full=ring finger protein 105 ame: full=tpr repeat protein d ame: full=tetratricopeptide repeat protein 3 short=tpr repeat protein 3	20	2.56752e-10	0.562	strongylocentrotus purpuratus hypothetical loc575300 mrna	protein	prot	nucl
THRIPS_11_08_2011_02039	None	3	4	8.10215e-84	0.64	ce033_rat ame: full=upf0465 protein c5orf33 homolog	20	5.71633e-106	0.6785	pediculus humanus corporis nadh mrna	protein	nucl	nucl
THRIPS_11_08_2011_02040	None	0	0			---NA---	0			---NA---	none
THRIPS_11_08_2011_02041	None	0	0			---NA---	0			---NA---	none
THRIPS_11_08_2011_02042	Strong	10	20	5.0455e-97	0.6195	dnaj1_drome ame: full= protein homolog 1 short=droj1	20	1.97105e-151	0.8835	aedes aegypti dna-j hsp40 partial mrna	protein	nucl	nucl
THRIPS_11_08_2011_02043	Weak	0	0			---NA---	0			---NA---	none
THRIPS_11_08_2011_02044	Good	13	9	8.51486e-42	0.701111	ndus4_gecja ame: full=nadh dehydrogenase iron-sulfur protein mitochondrial ame: full=complex i-18 kda short=ci-18 kda ame: full=nadh-ubiquinone oxidoreductase 18 kda subunit flags: precursor	20	9.57727e-51	0.7595	armigeres subalbatus asap id: 38931 nadh-ubiquinone oxidoreductase subunit mrna sequence	protein	nucl	nucl
THRIPS_11_08_2011_02045	Weak	0	0			---NA---	0			---NA---	none
THRIPS_11_08_2011_02046	Good	4	20	7.67894e-15	0.63	nu1m_anoqu ame: full=nadh-ubiquinone oxidoreductase chain 1 ame: full=nadh dehydrogenase subunit 1	20	1.38154e-33	0.633	thrips imaginis complete genome	uncertain	nucl	nucl
THRIPS_11_08_2011_02047	Good	14	20	5.32407e-116	0.788	rl8_mambr ame: full=60s ribosomal protein l8	20	1.7187e-143	0.962	triatoma infestans clone ti-337 60s ribosomal protein l8 complete cds	protein	nucl	nucl
THRIPS_11_08_2011_02048	Strong	6	9	6.21597e-09	0.471111	syt3_mouse ame: full=synaptotagmin-3 ame: full=synaptotagmin iii short=	5	1.72013e-12	0.558	apis mellifera synaptotagmin 20 mrna	protein	nucl	nucl
THRIPS_11_08_2011_02049	Good	17	8	3.25957e-09	0.75875	cdk9a_xenla ame: full=cell division protein kinase 9-a ame: full=cyclin-dependent kinase 9-a	20	1.91992e-22	0.92	bombus impatiens cyclin-dependent kinase 9-like mrna	protein	nucl	nucl
THRIPS_11_08_2011_02050	Weak	0	0			---NA---	0			---NA---	none
THRIPS_11_08_2011_02051	None	0	0			---NA---	0			---NA---	none
[truncated: 29,392 more rows]
