# Supplementary material for: Analysis of the Salivary Gland Transcriptome of Frankliniella occidentalis
Source: PLoS One. 2014 Apr 15;9(4):e94447. doi: 10.1371/journal.pone.0094447 (PMC3988053; doi:10.1371/journal.pone.0094447)
Supplement: Table S2 — Descriptive information on the 12,166 Frankliniella occidentalis sialotranscriptome contigs with significant BLAST hits (E-value≤1.0E−6), includes: information on alignment and hit description. (XLSX) [file pone.0094447.s002.xlsx]

## Sheet: nr top blasts
Sequence name	Sequence desc.	Sequence length	Hit desc.	Hit ACC	E-Value	Similarity	Score	Alignment length	Positives
THRIPS_11_08_2011_00004	pg1 homology to homo sapiens	461	gi|270496068|ref|ZP_06213060.1|hypothetical protein AcavDRAFT_4806 [Acidovorax avenae subsp. avenae ATCC 19860] >gi|270327086|gb|EFA37945.1| hypothetical protein AcavDRAFT_4806 [Acidovorax avenae subsp. avenae ATCC 19860]	ZP_06213060	1.99946e-50	82	201.83	145	119
THRIPS_11_08_2011_00005	conserved protein	411	gi|167630419|ref|YP_001680918.1|hypothetical protein HM1_3149 [Heliobacterium modesticaldum Ice1] >gi|167593159|gb|ABZ84907.1| conserved hypothetical protein [Heliobacterium modesticaldum Ice1]	YP_001680918	8.55334e-17	63	90.1225	79	50
THRIPS_11_08_2011_00013	conserved protein	239	gi|257147736|emb|CAR86709.1|Conserved protein [Lactobacillus rhamnosus GG] >gi|257147755|emb|CAR86728.1| Conserved protein [Lactobacillus rhamnosus GG]	CAR86709	1.28334e-12	93	76.2554	45	42
THRIPS_11_08_2011_00015	leucine rich protein	930	gi|189353843|ref|YP_001949470.1|hypothetical protein BMULJ_05092 [Burkholderia multivorans ATCC 17616] >gi|189337865|dbj|BAG46934.1| hypothetical protein [Burkholderia multivorans ATCC 17616]	YP_001949470	1.75782e-47	80	194.126	123	99
THRIPS_11_08_2011_00016	conserved protein	518	gi|78033430|emb|CAJ30045.1|conserved hypothetical protein [Magnetospirillum gryphiswaldense]	CAJ30045	3.84132e-24	69	80.4925	63	44
THRIPS_11_08_2011_00018	vit2_peram ame: full=vitellogenin-2 short=vg-2 flags: precursor	218	gi|48428677|sp|Q9BPS0.1|VIT2_PERAMRecName: Full=Vitellogenin-2; Short=Vg-2; Flags: Precursor	Q9BPS0	5.64924e-18	72	89.3521	70	51
THRIPS_11_08_2011_00019	vit1_solin ame: full=vitellogenin-1 ame: full=vitellogenin short=vg flags: precursor	210	gi|74841527|sp|Q7Z1M0.1|VIT1_SOLINRecName: Full=Vitellogenin-1; AltName: Full=Vitellogenin; Short=VG; Flags: Precursor	Q7Z1M0	3.69533e-17	76	86.6557	68	52
THRIPS_11_08_2011_00020	vit_antgr ame: full=vitellogenin contains: ame: full=yp47 contains: ame: full=yp160 flags: precursor	1333	gi|3123007|sp|Q05808.1|VIT_ANTGRRecName: Full=Vitellogenin; Contains: RecName: Full=YP47; Contains: RecName: Full=YP160; Flags: Precursor	Q05808	1.10917e-32	57	141.354	223	129
THRIPS_11_08_2011_00021	vit1_peram ame: full=vitellogenin-1 short=vg-1 flags: precursor	3421	gi|48428690|sp|Q9U8M0.1|VIT1_PERAMRecName: Full=Vitellogenin-1; Short=Vg-1; Flags: Precursor	Q9U8M0	2.75074e-151	49	536.954	1125	562
THRIPS_11_08_2011_00022	vit1_peram ame: full=vitellogenin-1 short=vg-1 flags: precursor	5655	gi|48428690|sp|Q9U8M0.1|VIT1_PERAMRecName: Full=Vitellogenin-1; Short=Vg-1; Flags: Precursor	Q9U8M0	0	51	669.463	1361	698
THRIPS_11_08_2011_00023	vit1_peram ame: full=vitellogenin-1 short=vg-1 flags: precursor	1974	gi|48428690|sp|Q9U8M0.1|VIT1_PERAMRecName: Full=Vitellogenin-1; Short=Vg-1; Flags: Precursor	Q9U8M0	7.07534e-53	71	209.149	207	147
THRIPS_11_08_2011_00024	vit1_peram ame: full=vitellogenin-1 short=vg-1 flags: precursor	3499	gi|48428690|sp|Q9U8M0.1|VIT1_PERAMRecName: Full=Vitellogenin-1; Short=Vg-1; Flags: Precursor	Q9U8M0	2.63211e-157	50	556.984	1119	570
THRIPS_11_08_2011_00027	aqp4_mouse ame: full=aquaporin-4 short=aqp-4 ame: full=mercurial-insensitive water channel short=miwc ame: full=wch4	2357	gi|47117859|sp|P55088.2|AQP4_MOUSERecName: Full=Aquaporin-4; Short=AQP-4; AltName: Full=Mercurial-insensitive water channel; Short=MIWC; AltName: Full=WCH4	P55088	4.47568e-33	50	143.665	253	128
THRIPS_11_08_2011_00031	nu5m_aedae ame: full=nadh-ubiquinone oxidoreductase chain 5 ame: full=nadh dehydrogenase subunit 5	2033	gi|229891256|sp|B0FWD3.1|NU5M_AEDAERecName: Full=NADH-ubiquinone oxidoreductase chain 5; AltName: Full=NADH dehydrogenase subunit 5	B0FWD3	6.24285e-36	71	152.91	160	114
THRIPS_11_08_2011_00032	nu5m_aedae ame: full=nadh-ubiquinone oxidoreductase chain 5 ame: full=nadh dehydrogenase subunit 5	3251	gi|229891256|sp|B0FWD3.1|NU5M_AEDAERecName: Full=NADH-ubiquinone oxidoreductase chain 5; AltName: Full=NADH dehydrogenase subunit 5	B0FWD3	1.32533e-70	69	268.855	356	249
THRIPS_11_08_2011_00033	cyb_samcr ame: full=cytochrome b ame: full=complex iii subunit 3 ame: full=complex iii subunit iii ame: full=cytochrome b-c1 complex subunit 3 ame: full=ubiquinol-cytochrome-c reductase complex cytochrome b subunit	466	gi|30912846|sp|Q8M0K7.1|CYB_SAMCRRecName: Full=Cytochrome b; AltName: Full=Complex III subunit 3; AltName: Full=Complex III subunit III; AltName: Full=Cytochrome b-c1 complex subunit 3; AltName: Full=Ubiquinol-cytochrome-c reductase complex cytochrome b subunit	Q8M0K7	2.97532e-25	71	114.005	126	90
THRIPS_11_08_2011_00034	cyb_anoga ame: full=cytochrome b ame: full=complex iii subunit 3 ame: full=complex iii subunit iii ame: full=cytochrome b-c1 complex subunit 3 ame: full=ubiquinol-cytochrome-c reductase complex cytochrome b subunit	446	gi|461874|sp|P34844.1|CYB_ANOGARecName: Full=Cytochrome b; AltName: Full=Complex III subunit 3; AltName: Full=Complex III subunit III; AltName: Full=Cytochrome b-c1 complex subunit 3; AltName: Full=Ubiquinol-cytochrome-c reductase complex cytochrome b subunit	P34844	9.28099e-15	68	78.9518	102	70
THRIPS_11_08_2011_00042	cg14803 cg14803-pa	1470	gi|193692984|ref|XP_001947453.1|PREDICTED: similar to CG14803 CG14803-PA [Acyrthosiphon pisum]	XP_001947453	3.17479e-08	43	64.6994	285	123
THRIPS_11_08_2011_00045	mysa_drome ame: full=myosin heavy muscle	1369	gi|110825729|sp|P05661.4|MYSA_DROMERecName: Full=Myosin heavy chain, muscle	P05661	0	88	656.366	417	370
THRIPS_11_08_2011_00046	mysa_drome ame: full=myosin heavy muscle	1721	gi|110825729|sp|P05661.4|MYSA_DROMERecName: Full=Myosin heavy chain, muscle	P05661	0	90	835.484	511	463
THRIPS_11_08_2011_00050	vatl_drome ame: full=v-type proton atpase 16 kda proteolipid subunit short=v-atpase 16 kda proteolipid subunit short=vha16k ame: full=ductin ame: full=vacuolar proton pump 16 kda proteolipid subunit	2565	gi|137478|sp|P23380.1|VATL_DROMERecName: Full=V-type proton ATPase 16 kDa proteolipid subunit; Short=V-ATPase 16 kDa proteolipid subunit; Short=VHA16K; AltName: Full=Ductin; AltName: Full=Vacuolar proton pump 16 kDa proteolipid subunit	P23380	1.80521e-59	95	231.491	130	124
THRIPS_11_08_2011_00051	copd_mouse ame: full=coatomer subunit delta ame: full=archain ame: full=delta-coat protein short=delta-cop	5830	gi|81883877|sp|Q5XJY5.1|COPD_MOUSERecName: Full=Coatomer subunit delta; AltName: Full=Archain; AltName: Full=Delta-coat protein; Short=Delta-COP	Q5XJY5	1.95199e-176	78	621.313	524	409
THRIPS_11_08_2011_00054	hipk2_mesau ame: full=homeodomain-interacting protein kinase 2 ame: full=mx-interacting protein kinase ame: full=pkm	3265	gi|61213753|sp|Q9WUM7.2|HIPK2_MESAURecName: Full=Homeodomain-interacting protein kinase 2; AltName: Full=Mx-interacting protein kinase; AltName: Full=PKM	Q9WUM7	5.07158e-179	67	629.017	651	441
THRIPS_11_08_2011_00055	rpb1_drome ame: full=dna-directed rna polymerase ii subunit rpb1 short=rna polymerase ii subunit b1 ame: full=dna-directed rna polymerase iii largest subunit	6165	gi|14286163|sp|P04052.4|RPB1_DROMERecName: Full=DNA-directed RNA polymerase II subunit RPB1; Short=RNA polymerase II subunit B1; AltName: Full=DNA-directed RNA polymerase III largest subunit	P04052	0	91	2066.58	1186	1088
THRIPS_11_08_2011_00056	klc_lolpe ame: full=kinesin light chain short=klc	208	gi|1170680|sp|P46825.1|KLC_LOLPERecName: Full=Kinesin light chain; Short=KLC	P46825	4.99438e-14	97	76.2554	42	41
THRIPS_11_08_2011_00057	pol_sfv1 ame: full=pro-pol polyprotein ame: full=pr125pol contains: ame: full=protease reverse transcriptase ribonuclease h ame: full=p87pro-rt-r contains: ame: full=protease reverse transcriptase ame: full=p65pro-rt contains: ame: full=ribonuclease h short=rnase h contains: ame: full=integrase short=in ame: full=p42in	5085	gi|110282985|sp|P23074.3|POL_SFV1RecName: Full=Pro-Pol polyprotein; AltName: Full=Pr125Pol; Contains: RecName: Full=Protease/Reverse transcriptase/ribonuclease H; AltName: Full=p87Pro-RT-RNaseH; Contains: RecName: Full=Protease/Reverse transcriptase; AltName: Full=p65Pro-RT; Contains: RecName: Full=Ribonuclease H; Short=RNase H; Contains: RecName: Full=Integrase; Short=IN; AltName: Full=p42In	P23074	3.12072e-21	47	105.531	243	115
THRIPS_11_08_2011_00058	aff4_dromo ame: full=af4 fmr2 family member 4 ame: full=protein lilliputian	2511	gi|298351518|sp|B4KFE1.1|AFF4_DROMORecName: Full=AF4/FMR2 family member 4; AltName: Full=Protein lilliputian	B4KFE1	2.94554e-06	65	54.6842	69	45
THRIPS_11_08_2011_00059	aff4_dromo ame: full=af4 fmr2 family member 4 ame: full=protein lilliputian	6919	gi|298351518|sp|B4KFE1.1|AFF4_DROMORecName: Full=AF4/FMR2 family member 4; AltName: Full=Protein lilliputian	B4KFE1	1.81101e-11	58	73.559	136	79
THRIPS_11_08_2011_00060	sqd_drome ame: full=rna-binding protein squid ame: full=heterogeneous nuclear ribonucleoprotein 40 short=hnrnp 40	3646	gi|55584092|sp|Q08473.3|SQD_DROMERecName: Full=RNA-binding protein squid; AltName: Full=Heterogeneous nuclear ribonucleoprotein 40; Short=HNRNP 40	Q08473	1.77116e-71	90	271.937	164	148
THRIPS_11_08_2011_00061	variant g	953	gi|269063722|emb|CAS85146.1|squid, variant G [Blattella germanica]	CAS85146	1.96764e-09	69	67.781	59	41
THRIPS_11_08_2011_00062	polx_tobac ame: full=retrovirus-related pol polyprotein from transposon tnt 1-94 includes: ame: full=protease includes: ame: full=reverse transcriptase includes: ame: full=endonuclease	3103	gi|130582|sp|P10978.1|POLX_TOBACRecName: Full=Retrovirus-related Pol polyprotein from transposon TNT 1-94; Includes: RecName: Full=Protease; Includes: RecName: Full=Reverse transcriptase; Includes: RecName: Full=Endonuclease	P10978	3.10427e-61	56	237.654	389	220
THRIPS_11_08_2011_00066	zo1_canfa ame: full=tight junction protein zo-1 ame: full=tight junction protein 1 ame: full=zona occludens protein 1 ame: full=zonula occludens protein 1	4898	gi|62901480|sp|O97758.1|ZO1_CANFARecName: Full=Tight junction protein ZO-1; AltName: Full=Tight junction protein 1; AltName: Full=Zona occludens protein 1; AltName: Full=Zonula occludens protein 1	O97758	7.28103e-84	64	313.538	401	259
THRIPS_11_08_2011_00068	ma2a1_human ame: full=alpha-mannosidase 2 ame: full=golgi alpha-mannosidase ii short=aman ii short=man ii ame: full=mannosidase alpha class 2a member 1 ame: full=mannosyl-oligosaccharide - -alpha-mannosidase	1157	gi|146345453|sp|Q16706.2|MA2A1_HUMANRecName: Full=Alpha-mannosidase 2; AltName: Full=Golgi alpha-mannosidase II; Short=AMan II; Short=Man II; AltName: Full=Mannosidase alpha class 2A member 1; AltName: Full=Mannosyl-oligosaccharide 1,3-1,6-alpha-mannosidase	Q16706	7.09258e-25	53	115.161	213	113
THRIPS_11_08_2011_00069	rl40_drome ame: full=ubiquitin-60s ribosomal protein l40 ame: full=cep52 contains: ame: full=ubiquitin contains: ame: full=60s ribosomal protein l40 flags: precursor	265	gi|302393715|sp|P18101.2|RL40_DROMERecName: Full=Ubiquitin-60S ribosomal protein L40; AltName: Full=CEP52; Contains: RecName: Full=Ubiquitin; Contains: RecName: Full=60S ribosomal protein L40; Flags: Precursor	P18101	6.83024e-24	97	108.997	49	48
THRIPS_11_08_2011_00070	ymd3_caeel ame: full= uncharacterized transposon-derived protein	797	gi|465917|sp|P34457.1|YMD3_CAEELRecName: Full=Putative uncharacterized transposon-derived protein F54H12.3	P34457	6.10281e-13	54	74.7146	122	67
THRIPS_11_08_2011_00072	dspp_human ame: full=dentin sialophosphoprotein contains: ame: full=dentin phosphoprotein ame: full=dentin phosphophoryn short=dpp contains: ame: full=dentin sialoprotein short=dsp flags: precursor	1231	gi|215273974|sp|Q9NZW4.2|DSPP_HUMANRecName: Full=Dentin sialophosphoprotein; Contains: RecName: Full=Dentin phosphoprotein; AltName: Full=Dentin phosphophoryn; Short=DPP; Contains: RecName: Full=Dentin sialoprotein; Short=DSP; Flags: Precursor	Q9NZW4	1.72326e-08	38	60.8474	411	158
THRIPS_11_08_2011_00074	ddx17_drome ame: full=atp-dependent rna helicase p62	2339	gi|30923187|sp|P19109.3|DDX17_DROMERecName: Full=ATP-dependent RNA helicase p62	P19109	3.99055e-167	82	588.956	431	354
THRIPS_11_08_2011_00075	insulin receptor substrate 1-b	3768	gi|242018277|ref|XP_002429605.1|hypothetical protein Phum_PHUM441300 [Pediculus humanus corporis] >gi|212514572|gb|EEB16867.1| hypothetical protein Phum_PHUM441300 [Pediculus humanus corporis]	XP_002429605	4.13965e-59	45	235.343	931	420
THRIPS_11_08_2011_00076	cell wall-associated hydrolase	378	gi|189353841|ref|YP_001949468.1|cell wall-associated hydrolase [Burkholderia multivorans ATCC 17616] >gi|189337863|dbj|BAG46932.1| cell wall-associated hydrolase [Burkholderia multivorans ATCC 17616]	YP_001949468	2.94689e-49	89	197.978	125	112
THRIPS_11_08_2011_00078	gs1_drome ame: full=gs1-like protein	1922	gi|19864674|sp|Q94529.2|GS1_DROMERecName: Full=GS1-like protein	Q94529	2.53296e-31	73	137.502	113	83
THRIPS_11_08_2011_00079	if2p_human ame: full=eukaryotic translation initiation factor 5b short=eif-5b ame: full=translation initiation factor if-2	4420	gi|269849752|sp|O60841.4|IF2P_HUMANRecName: Full=Eukaryotic translation initiation factor 5B; Short=eIF-5B; AltName: Full=Translation initiation factor IF-2	O60841	0	85	872.463	622	533
THRIPS_11_08_2011_00080	dhsa_rat ame: full=succinate dehydrogenase flavoprotein mitochondrial ame: full=flavoprotein subunit of complex ii short=fp flags: precursor	3006	gi|52782765|sp|Q920L2.1|DHSA_RATRecName: Full=Succinate dehydrogenase [ubiquinone] flavoprotein subunit, mitochondrial; AltName: Full=Flavoprotein subunit of complex II; Short=Fp; Flags: Precursor	Q920L2	0	86	986.867	657	571
THRIPS_11_08_2011_00082	macf1_human ame: full=microtubule-actin cross-linking factor isoforms 1 2 3 5 ame: full=620 kda actin-binding protein short=abp620 ame: full=actin cross-linking family protein 7 ame: full=macrophin-1 ame: full=trabeculin-alpha	4088	gi|56405387|sp|Q9UPN3.3|MACF1_HUMANRecName: Full=Microtubule-actin cross-linking factor 1, isoforms 1/2/3/5; AltName: Full=620 kDa actin-binding protein; Short=ABP620; AltName: Full=Actin cross-linking family protein 7; AltName: Full=Macrophin-1; AltName: Full=Trabeculin-alpha	Q9UPN3	3.35317e-135	68	483.797	544	372
THRIPS_11_08_2011_00083	macf1_human ame: full=microtubule-actin cross-linking factor isoforms 1 2 3 5 ame: full=620 kda actin-binding protein short=abp620 ame: full=actin cross-linking family protein 7 ame: full=macrophin-1 ame: full=trabeculin-alpha	4029	gi|56405387|sp|Q9UPN3.3|MACF1_HUMANRecName: Full=Microtubule-actin cross-linking factor 1, isoforms 1/2/3/5; AltName: Full=620 kDa actin-binding protein; Short=ABP620; AltName: Full=Actin cross-linking family protein 7; AltName: Full=Macrophin-1; AltName: Full=Trabeculin-alpha	Q9UPN3	2.98608e-136	58	487.263	720	422
THRIPS_11_08_2011_00085	ndka_droya ame: full=nucleoside diphosphate kinase short=ndk short=ndp kinase ame: full=abnormal wing disks protein	701	gi|55583905|sp|Q6XI71.1|NDKA_DROYARecName: Full=Nucleoside diphosphate kinase; Short=NDK; Short=NDP kinase; AltName: Full=Abnormal wing disks protein	Q6XI71	1.17991e-67	90	256.144	148	134
THRIPS_11_08_2011_00088	rab37_human ame: full=ras-related protein rab-37	1930	gi|20139581|sp|Q96AX2.3|RAB37_HUMANRecName: Full=Ras-related protein Rab-37	Q96AX2	6.84207e-77	84	288.886	198	168
THRIPS_11_08_2011_00089	lph_rabit ame: full=lactase-phlorizin hydrolase ame: full=lactase-glycosylceramidase includes: ame: full=lactase includes: ame: full=phlorizin hydrolase flags: precursor	831	gi|126429|sp|P09849.1|LPH_RABITRecName: Full=Lactase-phlorizin hydrolase; AltName: Full=Lactase-glycosylceramidase; Includes: RecName: Full=Lactase; Includes: RecName: Full=Phlorizin hydrolase; Flags: Precursor	P09849	9.57387e-49	57	193.741	252	146
THRIPS_11_08_2011_00090	myro1_brebr ame: full=myrosinase 1 ame: full=beta-glucosidase 1 ame: full=beta-thioglucosidase 1 ame: full=beta-thioglucosidase glucohydrolase 1 ame: full=sinigrinase 1 ame: full=thioglucosidase 1	661	gi|74938515|sp|Q95X01.1|MYRO1_BREBRRecName: Full=Myrosinase 1; AltName: Full=Beta-glucosidase 1; AltName: Full=Beta-thioglucosidase 1; AltName: Full=Beta-thioglucosidase glucohydrolase 1; AltName: Full=Sinigrinase 1; AltName: Full=Thioglucosidase 1	Q95X01	3.63e-68	71	257.684	217	156
THRIPS_11_08_2011_00095	rhbt1_human ame: full=rho-related btb domain-containing protein 1	1988	gi|26006842|sp|O94844.2|RHBT1_HUMANRecName: Full=Rho-related BTB domain-containing protein 1	O94844	3.72581e-110	58	399.438	595	346
THRIPS_11_08_2011_00096	zfr_mouse ame: full=zinc finger rna-binding protein	3659	gi|162416199|sp|O88532.2|ZFR_MOUSERecName: Full=Zinc finger RNA-binding protein	O88532	8.47421e-98	63	359.377	407	259
THRIPS_11_08_2011_00097	zfr_mouse ame: full=zinc finger rna-binding protein	3737	gi|162416199|sp|O88532.2|ZFR_MOUSERecName: Full=Zinc finger RNA-binding protein	O88532	8.67616e-98	63	359.377	407	259
THRIPS_11_08_2011_00101	hypothetical protein AcavDRAFT_4806 [Acidovorax avenae subsp. avenae ATCC 19860]	270	gi|270496068|ref|ZP_06213060.1|hypothetical protein AcavDRAFT_4806 [Acidovorax avenae subsp. avenae ATCC 19860] >gi|270327086|gb|EFA37945.1| hypothetical protein AcavDRAFT_4806 [Acidovorax avenae subsp. avenae ATCC 19860]	ZP_06213060	6.7756e-22	76	64.3142	46	35
THRIPS_11_08_2011_00104	vit3_solin ame: full=vitellogenin-3 flags: precursor	455	gi|122003631|sp|Q2VQM5.1|VIT3_SOLINRecName: Full=Vitellogenin-3; Flags: Precursor	Q2VQM5	1.63149e-33	64	141.354	146	94
THRIPS_11_08_2011_00106	at10d_human ame: full=probable phospholipid-transporting atpase vd ame: full=atpase class v type 10d	5511	gi|300669610|sp|Q9P241.3|AT10D_HUMANRecName: Full=Probable phospholipid-transporting ATPase VD; AltName: Full=ATPase class V type 10D	Q9P241	2.27691e-142	60	508.064	674	406
THRIPS_11_08_2011_00107	rl13_spofr ame: full=60s ribosomal protein l13	337	gi|21759389|sp|Q962U1.1|RL13_SPOFRRecName: Full=60S ribosomal protein L13	Q962U1	6.35227e-17	77	85.8853	71	55
THRIPS_11_08_2011_00108	5ntd_lutlo ame: full=protein 5nuc includes: ame: full=udp-sugar hydrolase ame: full=udp-sugar diphosphatase ame: full=udp-sugar pyrophosphatase includes: ame: full=5 -nucleotidase short=5 -nt flags: precursor	497	gi|12229680|sp|Q9XZ43.1|5NTD_LUTLORecName: Full=Protein 5NUC; Includes: RecName: Full=UDP-sugar hydrolase; AltName: Full=UDP-sugar diphosphatase; AltName: Full=UDP-sugar pyrophosphatase; Includes: RecName: Full=5'-nucleotidase; Short=5'-NT; Flags: Precursor	Q9XZ43	2.68485e-25	64	114.39	162	104
THRIPS_11_08_2011_00109	gnpat_bovin ame: full=dihydroxyacetone phosphate acyltransferase short=dap-at short=dhap-at ame: full=acyl- :dihydroxyacetonephosphateacyltransferase ame: full=glycerone-phosphate o-acyltransferase	468	gi|172044184|sp|A4IF87.1|GNPAT_BOVINRecName: Full=Dihydroxyacetone phosphate acyltransferase; Short=DAP-AT; Short=DHAP-AT; AltName: Full=Acyl-CoA:dihydroxyacetonephosphateacyltransferase; AltName: Full=Glycerone-phosphate O-acyltransferase	A4IF87	2.15343e-47	76	187.578	154	118
THRIPS_11_08_2011_00113	brd4_mouse ame: full=bromodomain-containing protein 4 ame: full=mitotic chromosome-associated protein short=mcap	3737	gi|50400639|sp|Q9ESU6.1|BRD4_MOUSERecName: Full=Bromodomain-containing protein 4; AltName: Full=Mitotic chromosome-associated protein; Short=MCAP	Q9ESU6	1.1699e-102	57	375.555	480	274
THRIPS_11_08_2011_00117	sng1_human ame: full=synaptogyrin-1	4626	gi|115502453|sp|O43759.2|SNG1_HUMANRecName: Full=Synaptogyrin-1	O43759	9.67804e-38	64	160.229	217	140
THRIPS_11_08_2011_00119	ubc_pig ame: full=polyubiquitin-c contains: ame: full=ubiquitin-related contains: ame: full=ubiquitin flags: precursor	927	gi|302595945|sp|P0CG68.1|UBC_PIGRecName: Full=Polyubiquitin-C; Contains: RecName: Full=Ubiquitin-related; Contains: RecName: Full=Ubiquitin; Flags: Precursor	P0CG68	6.43933e-169	100	593.193	308	308
THRIPS_11_08_2011_00120	ubc_bovin ame: full=polyubiquitin-c contains: ame: full=ubiquitin-related contains: ame: full=ubiquitin flags: precursor	1763	gi|302595881|sp|P0CH28.1|UBC_BOVINRecName: Full=Polyubiquitin-C; Contains: RecName: Full=Ubiquitin-related; Contains: RecName: Full=Ubiquitin; Flags: Precursor	P0CH28	0	100	1126.69	587	587
THRIPS_11_08_2011_00121	clc_drome ame: full=clathrin light chain ame: full=dclc	965	gi|25089873|sp|Q9VWA1.1|CLC_DROMERecName: Full=Clathrin light chain; AltName: Full=dClc	Q9VWA1	1.4377e-41	60	170.244	213	128
THRIPS_11_08_2011_00122	spt6h_human ame: full=transcription elongation factor spt6 short=hspt6 ame: full=tat-cotransactivator 2 protein short=tat-ct2 protein	767	gi|51701986|sp|Q7KZ85.2|SPT6H_HUMANRecName: Full=Transcription elongation factor SPT6; Short=hSPT6; AltName: Full=Tat-cotransactivator 2 protein; Short=Tat-CT2 protein	Q7KZ85	4.87781e-89	79	327.405	254	201
THRIPS_11_08_2011_00123	tada3_xentr ame: full=transcriptional adapter 3 ame: full=ada3 homolog ame: full=transcriptional adapter 3-like short=ada3-like protein	3012	gi|82181398|sp|Q66JG5.1|TADA3_XENTRRecName: Full=Transcriptional adapter 3; AltName: Full=ADA3 homolog; AltName: Full=Transcriptional adapter 3-like; Short=ADA3-like protein	Q66JG5	1.00959e-16	43	61.6178	247	108
THRIPS_11_08_2011_00124	pg1 protein	615	gi|145690675|gb|ABP91180.1|unknown protein [Streptococcus suis 98HAH33] >gi|145690754|gb|ABP91259.1| unknown protein [Streptococcus suis 98HAH33] >gi|145690985|gb|ABP91490.1| unknown protein [Streptococcus suis 98HAH33] >gi|145691080|gb|ABP91585.1| unknown protein [Streptococcus suis 98HAH33]	ABP91180	1.49173e-59	89	233.032	125	112
THRIPS_11_08_2011_00125	sps1_drome ame: full= water dikinase ame: full=protein patufet ame: full=selenium donor protein ame: full=selenophosphate synthase ame: full=d	2206	gi|6174978|sp|O18373.1|SPS1_DROMERecName: Full=Selenide, water dikinase; AltName: Full=Protein patufet; AltName: Full=Selenium donor protein; AltName: Full=Selenophosphate synthase; AltName: Full=dSelD	O18373	0	92	696.041	399	369
THRIPS_11_08_2011_00131	tera_drome ame: full=transitional endoplasmic reticulum atpase ter94 ame: full=valosin-containing protein homolog	2878	gi|122087253|sp|Q7KN62.1|TERA_DROMERecName: Full=Transitional endoplasmic reticulum ATPase TER94; AltName: Full=Valosin-containing protein homolog	Q7KN62	0	95	1268.45	772	740
THRIPS_11_08_2011_00134	smg5_human ame: full=protein smg5 ame: full=est1-like protein b ame: full=lpts-rp1 ame: full=lpts-interacting protein ame: full=smg-5 homolog short=hsmg-5	2136	gi|84029494|sp|Q9UPR3.3|SMG5_HUMANRecName: Full=Protein SMG5; AltName: Full=EST1-like protein B; AltName: Full=LPTS-RP1; AltName: Full=LPTS-interacting protein; AltName: Full=SMG-5 homolog; Short=hSMG-5	Q9UPR3	3.72131e-55	52	216.853	429	225
THRIPS_11_08_2011_00135	clld6_human ame: full=chronic lymphocytic leukemia deletion region gene 6 protein short=cll deletion region gene 6 protein	3899	gi|109821809|sp|Q5W111.2|CLLD6_HUMANRecName: Full=Chronic lymphocytic leukemia deletion region gene 6 protein; Short=CLL deletion region gene 6 protein	Q5W111	3.06216e-37	60	158.303	199	120
THRIPS_11_08_2011_00138	znt7_chick ame: full=zinc transporter 7 short= -7 ame: full=solute carrier family 30 member 7	8651	gi|82126353|sp|Q5MNV6.1|ZNT7_CHICKRecName: Full=Zinc transporter 7; Short=ZnT-7; AltName: Full=Solute carrier family 30 member 7	Q5MNV6	1.54443e-92	70	343.199	378	266
THRIPS_11_08_2011_00140	unknown [Glycine max]	611	gi|255647586|gb|ACU24256.1|unknown [Glycine max]	ACU24256	7.01803e-15	97	76.2554	37	36
THRIPS_11_08_2011_00144	y1505_drome ame: full=la-related protein cg11505 ame: full=la ribonucleoprotein domain family member cg11505	5258	gi|74866666|sp|Q9I7T7.2|Y1505_DROMERecName: Full=La-related protein CG11505; AltName: Full=La ribonucleoprotein domain family member CG11505	Q9I7T7	3.1918e-69	60	265.003	340	205
THRIPS_11_08_2011_00148	conserved domain protein	240	gi|260222398|emb|CBA31922.1|hypothetical protein [Curvibacter putative symbiont of Hydra magnipapillata]	CBA31922	1.0641e-33	93	119.013	59	55
THRIPS_11_08_2011_00153	hsdl2_xenla ame: full=hydroxysteroid dehydrogenase-like protein 2	3314	gi|82186828|sp|Q6PAY8.1|HSDL2_XENLARecName: Full=Hydroxysteroid dehydrogenase-like protein 2	Q6PAY8	2.86885e-129	74	463.766	402	300
THRIPS_11_08_2011_00155	ypd1_caeel ame: full=uncharacterized protein	469	gi|1730896|sp|P48053.2|YPD1_CAEELRecName: Full=Uncharacterized protein C05D11.1	P48053	7.01839e-14	52	76.2554	151	79
THRIPS_11_08_2011_00157	nfh_human ame: full=neurofilament heavy polypeptide short=nf-h ame: full=200 kda neurofilament protein ame: full=neurofilament triplet h protein	610	gi|226726294|sp|P12036.4|NFH_HUMANRecName: Full=Neurofilament heavy polypeptide; Short=NF-H; AltName: Full=200 kDa neurofilament protein; AltName: Full=Neurofilament triplet H protein	P12036	1.78859e-07	43	55.8398	214	93
THRIPS_11_08_2011_00159	cyb_elimo ame: full=cytochrome b ame: full=complex iii subunit 3 ame: full=complex iii subunit iii ame: full=cytochrome b-c1 complex subunit 3 ame: full=ubiquinol-cytochrome-c reductase complex cytochrome b subunit	800	gi|30580310|sp|Q9XNV3.1|CYB_ELIMORecName: Full=Cytochrome b; AltName: Full=Complex III subunit 3; AltName: Full=Complex III subunit III; AltName: Full=Cytochrome b-c1 complex subunit 3; AltName: Full=Ubiquinol-cytochrome-c reductase complex cytochrome b subunit	Q9XNV3	2.21951e-71	77	268.855	231	180
THRIPS_11_08_2011_00167	ubl3_human ame: full=ubiquitin-like protein 3 ame: full=membrane-anchored ubiquitin-fold protein short= short=mub ame: full=protein hcg-1 flags: precursor	2582	gi|52082770|sp|O95164.1|UBL3_HUMANRecName: Full=Ubiquitin-like protein 3; AltName: Full=Membrane-anchored ubiquitin-fold protein; Short=HsMUB; Short=MUB; AltName: Full=Protein HCG-1; Flags: Precursor >gi|114154826|sp|Q2TA46.1|UBL3_BOVIN RecName: Full=Ubiquitin-like protein 3; AltName: Full=Membrane-anchored ubiquitin-fold protein; Short=MUB; Flags: Precursor	O95164	3.5637e-39	86	164.081	100	86
THRIPS_11_08_2011_00168	skp1_rat ame: full=s-phase kinase-associated protein 1 ame: full=cyclin-a cdk2-associated protein p19 ame: full=s-phase kinase-associated protein 1a ame: full=p19a ame: full=p19skp1	640	gi|54036436|sp|Q6PEC4.3|SKP1_RATRecName: Full=S-phase kinase-associated protein 1; AltName: Full=Cyclin-A/CDK2-associated protein p19; AltName: Full=S-phase kinase-associated protein 1A; AltName: Full=p19A; AltName: Full=p19skp1 >gi|54036535|sp|Q9WTX5.3|SKP1_MOUSE RecName: Full=S-phase kinase-associated protein 1; AltName: Full=Cyclin-A/CDK2-associated protein p19; AltName: Full=S-phase kinase-as…	Q6PEC4	4.48547e-60	91	230.72	126	115
THRIPS_11_08_2011_00171	ctns_drome ame: full=cystinosin homolog	2349	gi|34223744|sp|Q9VCR7.2|CTNS_DROMERecName: Full=Cystinosin homolog	Q9VCR7	1.90146e-92	66	340.887	389	258
THRIPS_11_08_2011_00173	rl30_brabe ame: full=60s ribosomal protein l30	1564	gi|17368245|sp|P58374.1|RL30_BRABERecName: Full=60S ribosomal protein L30	P58374	4.71305e-25	96	116.316	59	57
THRIPS_11_08_2011_00174	bccip_drome ame: full=protein bccip homolog	685	gi|74868853|sp|Q9VFR0.2|BCCIP_DROMERecName: Full=Protein BCCIP homolog	Q9VFR0	3.80519e-39	68	161.384	200	136
THRIPS_11_08_2011_00177	mdhm_human ame: full=malate mitochondrial flags: precursor	1832	gi|215274114|sp|P40926.3|MDHM_HUMANRecName: Full=Malate dehydrogenase, mitochondrial; Flags: Precursor	P40926	1.32262e-130	82	467.233	338	278
THRIPS_11_08_2011_00180	opa32_drome ame: full= opa3-like protein cg13603	210	gi|20139291|sp|Q9VCG3.1|OPA32_DROMERecName: Full=Putative OPA3-like protein CG13603	Q9VCG3	2.24188e-14	74	77.411	63	47
THRIPS_11_08_2011_00184	zfy21_bovin ame: full=zinc finger fyve domain-containing protein 21	416	gi|122131741|sp|Q05B78.1|ZFY21_BOVINRecName: Full=Zinc finger FYVE domain-containing protein 21	Q05B78	8.38277e-21	65	62.003	52	34
THRIPS_11_08_2011_00185	adenylate cyclase type 9	305	gi|307170838|gb|EFN62949.1|Adenylate cyclase type 9 [Camponotus floridanus]	EFN62949	3.34709e-29	74	131.339	105	78
THRIPS_11_08_2011_00189	ken1_culqu ame: full=transcription factor ken 1	370	gi|215275155|sp|B0X9H6.1|KEN1_CULQURecName: Full=Transcription factor Ken 1	B0X9H6	1.15548e-10	88	65.0846	36	32
THRIPS_11_08_2011_00192	c1tc_drome ame: full=c-1-tetrahydrofolate cytoplasmic short=c1-thf synthase includes: ame: full=methylenetetrahydrofolate dehydrogenase includes: ame: full=methenyltetrahydrofolate cyclohydrolase includes: ame: full=formyltetrahydrofolate synthetase	3142	gi|50403703|sp|O96553.4|C1TC_DROMERecName: Full=C-1-tetrahydrofolate synthase, cytoplasmic; Short=C1-THF synthase; Includes: RecName: Full=Methylenetetrahydrofolate dehydrogenase; Includes: RecName: Full=Methenyltetrahydrofolate cyclohydrolase; Includes: RecName: Full=Formyltetrahydrofolate synthetase	O96553	0	81	1216.06	933	761
THRIPS_11_08_2011_00193	fcho2_human ame: full=fch domain only protein 2	3612	gi|119369487|sp|Q0JRZ9.2|FCHO2_HUMANRecName: Full=FCH domain only protein 2	Q0JRZ9	8.22759e-37	71	156.762	157	112
THRIPS_11_08_2011_00194	arf1_drome ame: full=adp-ribosylation factor 1	2636	gi|47117660|sp|P61209.2|ARF1_DROMERecName: Full=ADP-ribosylation factor 1 >gi|47117661|sp|P61210.2|ARF1_LOCMI RecName: Full=ADP-ribosylation factor 1; AltName: Full=lARF1	P61209	6.32611e-100	100	365.925	182	182
THRIPS_11_08_2011_00195	bap31_human ame: full=b-cell receptor-associated protein 31 short=bcr-associated protein 31 short=bap31 ame: full=6c6-ag tumor-associated antigen ame: full=protein cdm ame: full=p28	1599	gi|1705725|sp|P51572.3|BAP31_HUMANRecName: Full=B-cell receptor-associated protein 31; Short=BCR-associated protein 31; Short=Bap31; AltName: Full=6C6-AG tumor-associated antigen; AltName: Full=Protein CDM; AltName: Full=p28	P51572	1.77414e-35	60	150.984	254	154
THRIPS_11_08_2011_00196	csk2a_spofr ame: full=casein kinase ii subunit alpha short=ck ii subunit alpha	3047	gi|13628721|sp|O76484.1|CSK2A_SPOFRRecName: Full=Casein kinase II subunit alpha; Short=CK II subunit alpha	O76484	4.53908e-174	97	612.453	332	325
THRIPS_11_08_2011_00197	ide_human ame: full=insulin-degrading enzyme ame: full=abeta-degrading protease ame: full=insulin protease short=insulinase ame: full=insulysin	2600	gi|215274252|sp|P14735.4|IDE_HUMANRecName: Full=Insulin-degrading enzyme; AltName: Full=Abeta-degrading protease; AltName: Full=Insulin protease; Short=Insulinase; AltName: Full=Insulysin	P14735	0	70	860.907	823	584
THRIPS_11_08_2011_00199	rl8_mambr ame: full=60s ribosomal protein l8	744	gi|51701882|sp|Q6RYS3.1|RL8_MAMBRRecName: Full=60S ribosomal protein L8 >gi|51701898|sp|Q95V39.1|RL8_SPOFR RecName: Full=60S ribosomal protein L8	Q6RYS3	2.97699e-120	94	431.024	228	216
THRIPS_11_08_2011_00200	pdxd1_xenla ame: full=pyridoxal-dependent decarboxylase domain-containing protein 1	3605	gi|82200202|sp|Q6DF78.1|PDXD1_XENLARecName: Full=Pyridoxal-dependent decarboxylase domain-containing protein 1	Q6DF78	1.32753e-103	54	378.637	623	341
THRIPS_11_08_2011_00201	tens1_human ame: full=tensin-1	2355	gi|212276466|sp|Q9HBL0.2|TENS1_HUMANRecName: Full=Tensin-1	Q9HBL0	6.45308e-32	79	139.813	111	88
THRIPS_11_08_2011_00202	usp9x_human ame: full=probable ubiquitin carboxyl-terminal hydrolase faf-x ame: full=deubiquitinating enzyme faf-x ame: full=fat facets in mammals short=hfam ame: full=fat facets x-linked ame: full=ubiquitin thiolesterase faf-x ame: full=ubiquitin-specific protease x chromosome ame: full=ubiquitin-specific-processing protease faf-x	3157	gi|81175100|sp|Q93008.2|USP9X_HUMANRecName: Full=Probable ubiquitin carboxyl-terminal hydrolase FAF-X; AltName: Full=Deubiquitinating enzyme FAF-X; AltName: Full=Fat facets in mammals; Short=hFAM; AltName: Full=Fat facets protein-related, X-linked; AltName: Full=Ubiquitin thiolesterase FAF-X; AltName: Full=Ubiquitin-specific protease 9, X chromosome; AltName: Full=Ubiquitin-specific-processing pr…	Q93008	0	66	908.286	1057	704
THRIPS_11_08_2011_00204	megf8_rat ame: full=multiple epidermal growth factor-like domains protein 8 short=multiple egf-like domains protein 8 ame: full=epidermal growth factor-like protein 4 short=egf-like protein 4 flags: precursor	1394	gi|218511692|sp|Q9QYP0.2|MEGF8_RATRecName: Full=Multiple epidermal growth factor-like domains protein 8; Short=Multiple EGF-like domains protein 8; AltName: Full=Epidermal growth factor-like protein 4; Short=EGF-like protein 4; Flags: Precursor	Q9QYP0	4.31768e-51	57	202.601	222	128
THRIPS_11_08_2011_00205	plec_human ame: full=plectin short=pcn short=pltn ame: full=hemidesmosomal protein 1 short=hd1 ame: full=plectin-1	4311	gi|209572726|sp|Q15149.3|PLEC_HUMANRecName: Full=Plectin; Short=PCN; Short=PLTN; AltName: Full=Hemidesmosomal protein 1; Short=HD1; AltName: Full=Plectin-1	Q15149	1.5474e-13	39	79.7221	588	231
THRIPS_11_08_2011_00206	bazooka cg5055-pa	3187	gi|242011557|ref|XP_002426515.1|hypothetical protein Phum_PHUM257850 [Pediculus humanus corporis] >gi|212510641|gb|EEB13777.1| hypothetical protein Phum_PHUM257850 [Pediculus humanus corporis]	XP_002426515	2.03445e-27	71	129.798	120	86
THRIPS_11_08_2011_00208	celf1_human ame: full=cugbp elav-like family member 1 short=celf-1 ame: full=50 kda nuclear polyadenylated rna-binding protein ame: full=bruno-like protein 2 ame: full=cug triplet repeat rna-binding protein 1 short=cug-bp1 ame: full=cug-bp- and etr-3-like factor 1 ame: full=deadenylation factor cug-bp ame: full=embryo deadenylation element-binding protein homolog short=eden-bp homolog ame: full=r…	4847	gi|17374605|sp|Q92879.2|CELF1_HUMANRecName: Full=CUGBP Elav-like family member 1; Short=CELF-1; AltName: Full=50 kDa nuclear polyadenylated RNA-binding protein; AltName: Full=Bruno-like protein 2; AltName: Full=CUG triplet repeat RNA-binding protein 1; Short=CUG-BP1; AltName: Full=CUG-BP- and ETR-3-like factor 1; AltName: Full=Deadenylation factor CUG-BP; AltName: Full=Embryo deadenylation elemen…	Q92879	4.82857e-80	52	300.827	563	294
THRIPS_11_08_2011_00209	cah15_mouse ame: full=carbonic anhydrase 15 ame: full=carbonate dehydratase xv ame: full=carbonic anhydrase xv short=ca-xv flags: precursor	1839	gi|30580362|sp|Q99N23.1|CAH15_MOUSERecName: Full=Carbonic anhydrase 15; AltName: Full=Carbonate dehydratase XV; AltName: Full=Carbonic anhydrase XV; Short=CA-XV; Flags: Precursor	Q99N23	4.21916e-36	50	153.295	256	130
THRIPS_11_08_2011_00210	larp_drome ame: full=la-related protein ame: full=dlarp	2414	gi|73621137|sp|Q9VAW5.4|LARP_DROMERecName: Full=La-related protein; AltName: Full=dlarp	Q9VAW5	3.01774e-109	70	396.741	391	276
THRIPS_11_08_2011_00211	rpn2_ponab ame: full=dolichyl-diphosphooligosaccharide--protein glycosyltransferase subunit 2 ame: full=dolichyl-diphosphooligosaccharide--protein glycosyltransferase 63 kda subunit ame: full=ribophorin ii short=rpn-ii ame: full=ribophorin-2 flags: precursor	2332	gi|75042051|sp|Q5RBM1.1|RPN2_PONABRecName: Full=Dolichyl-diphosphooligosaccharide--protein glycosyltransferase subunit 2; AltName: Full=Dolichyl-diphosphooligosaccharide--protein glycosyltransferase 63 kDa subunit; AltName: Full=Ribophorin II; Short=RPN-II; AltName: Full=Ribophorin-2; Flags: Precursor	Q5RBM1	1.22311e-91	55	338.191	612	341
THRIPS_11_08_2011_00212	pol4_drome ame: full=retrovirus-related pol polyprotein from transposon 412 includes: ame: full=protease includes: ame: full=reverse transcriptase includes: ame: full=endonuclease	1804	gi|130407|sp|P10394.1|POL4_DROMERecName: Full=Retrovirus-related Pol polyprotein from transposon 412; Includes: RecName: Full=Protease; Includes: RecName: Full=Reverse transcriptase; Includes: RecName: Full=Endonuclease	P10394	2.34045e-47	47	190.66	459	218
THRIPS_11_08_2011_00215	rtbs_drome ame: full=probable rna-directed dna polymerase from transposon bs ame: full=reverse transcriptase	3115	gi|74821373|sp|Q95SX7.1|RTBS_DROMERecName: Full=Probable RNA-directed DNA polymerase from transposon BS; AltName: Full=Reverse transcriptase	Q95SX7	1.91231e-23	48	104.375	260	125
THRIPS_11_08_2011_00216	dpys_mouse ame: full=dihydropyrimidinase short=dhp short=dhpase ame: full=dihydropyrimidine amidohydrolase ame: full=hydantoinase	3648	gi|21362535|sp|Q9EQF5.2|DPYS_MOUSERecName: Full=Dihydropyrimidinase; Short=DHP; Short=DHPase; AltName: Full=Dihydropyrimidine amidohydrolase; AltName: Full=Hydantoinase	Q9EQF5	5.16279e-71	73	270.396	214	157
THRIPS_11_08_2011_00217	pgbm_mouse ame: full=basement membrane-specific heparan sulfate proteoglycan core protein short=hspg contains: ame: full=endorepellin contains: ame: full=lg3 peptide flags: precursor	11127	gi|1172451|sp|Q05793.1|PGBM_MOUSERecName: Full=Basement membrane-specific heparan sulfate proteoglycan core protein; Short=HSPG; Contains: RecName: Full=Endorepellin; Contains: RecName: Full=LG3 peptide; Flags: Precursor	Q05793	0	42	834.713	2243	959
THRIPS_11_08_2011_00219	ytx1_xenla ame: full=transposon tx1 uncharacterized 82 kda protein ame: full=orf 1	1186	gi|141474|sp|P14380.1|YTX1_XENLARecName: Full=Transposon TX1 uncharacterized 82 kDa protein; AltName: Full=ORF 1	P14380	4.01116e-07	46	56.225	186	86
THRIPS_11_08_2011_00221	hypoxia-inducible factor 1 alpha	3725	gi|157114231|ref|XP_001657998.1|hypothetical protein AaeL_AAEL001056 [Aedes aegypti] >gi|108883604|gb|EAT47829.1| hypothetical protein AaeL_AAEL001056 [Aedes aegypti]	XP_001657998	4.12529e-27	84	129.028	88	74
THRIPS_11_08_2011_00223	fril_xenla ame: full=ferritin light oocyte isoform ame: full=b-ferritin ame: full=gv-lch ame: full=	1421	gi|46576433|sp|Q7SXA5.1|FRIL_XENLARecName: Full=Ferritin light chain, oocyte isoform; AltName: Full=B-ferritin; AltName: Full=GV-LCH; AltName: Full=XeBF	Q7SXA5	3.43199e-11	49	70.0922	165	82
THRIPS_11_08_2011_00225	arl5b_human ame: full=adp-ribosylation factor-like protein 5b ame: full=adp-ribosylation factor-like protein 8	3969	gi|34922029|sp|Q96KC2.1|ARL5B_HUMANRecName: Full=ADP-ribosylation factor-like protein 5B; AltName: Full=ADP-ribosylation factor-like protein 8 >gi|34922094|sp|Q9D4P0.3|ARL5B_MOUSE RecName: Full=ADP-ribosylation factor-like protein 5B; AltName: Full=ADP-ribosylation factor-like protein 8	Q96KC2	3.29749e-79	91	297.745	176	161
THRIPS_11_08_2011_00228	scy1-like protein 2	205	gi|270003539|gb|EEZ99986.1|hypothetical protein TcasGA2_TC002787 [Tribolium castaneum]	EEZ99986	4.10352e-27	95	124.405	69	66
THRIPS_11_08_2011_00229	wbs22_mouse ame: full=uncharacterized methyltransferase wbscr22 ame: full=williams-beuren syndrome chromosomal region 22 protein homolog	1129	gi|23822301|sp|Q9CY21.1|WBS22_MOUSERecName: Full=Uncharacterized methyltransferase WBSCR22; AltName: Full=Williams-Beuren syndrome chromosomal region 22 protein homolog	Q9CY21	8.17298e-95	76	347.436	277	211
THRIPS_11_08_2011_00230	nrx4_drome ame: full=neurexin-4 ame: full=neurexin iv flags: precursor	439	gi|17433136|sp|Q94887.2|NRX4_DROMERecName: Full=Neurexin-4; AltName: Full=Neurexin IV; Flags: Precursor	Q94887	1.03839e-47	91	188.348	104	95
THRIPS_11_08_2011_00233	zo1_canfa ame: full=tight junction protein zo-1 ame: full=tight junction protein 1 ame: full=zona occludens protein 1 ame: full=zonula occludens protein 1	267	gi|62901480|sp|O97758.1|ZO1_CANFARecName: Full=Tight junction protein ZO-1; AltName: Full=Tight junction protein 1; AltName: Full=Zona occludens protein 1; AltName: Full=Zonula occludens protein 1	O97758	8.65736e-14	85	75.485	49	42
THRIPS_11_08_2011_00235	vacuolar protein sorting 13d	203	gi|270013349|gb|EFA09797.1|hypothetical protein TcasGA2_TC011939 [Tribolium castaneum]	EFA09797	2.05281e-10	88	68.9366	43	38
THRIPS_11_08_2011_00237	retrotransposon-like family member (retr-1)-like	590	gi|156540121|ref|XP_001600245.1|PREDICTED: hypothetical protein [Nasonia vitripennis]	XP_001600245	2.62248e-15	76	85.8853	69	53
THRIPS_11_08_2011_00240	atg4d_mouse ame: full=cysteine protease atg4d ame: full=aut-like 4 cysteine endopeptidase ame: full=autophagin-4 ame: full=autophagy-related cysteine endopeptidase 4 ame: full=autophagy-related protein 4 homolog d	483	gi|61211815|sp|Q8BGV9.1|ATG4D_MOUSERecName: Full=Cysteine protease ATG4D; AltName: Full=AUT-like 4 cysteine endopeptidase; AltName: Full=Autophagin-4; AltName: Full=Autophagy-related cysteine endopeptidase 4; AltName: Full=Autophagy-related protein 4 homolog D	Q8BGV9	2.37867e-39	60	160.999	165	100
THRIPS_11_08_2011_00247	ddhd1_bovin ame: full=phospholipase ddhd1 ame: full=ddhd domain-containing protein 1 ame: full=phosphatidic acid-preferring phospholipase a1 short=pa-pla1	1164	gi|37999475|sp|O46606.1|DDHD1_BOVINRecName: Full=Phospholipase DDHD1; AltName: Full=DDHD domain-containing protein 1; AltName: Full=Phosphatidic acid-preferring phospholipase A1; Short=PA-PLA1	O46606	3.60246e-85	58	315.464	397	234
THRIPS_11_08_2011_00252	utp20_mouse ame: full=small subunit processome component 20 homolog ame: full=down-regulated in metastasis protein	203	gi|62510597|sp|Q5XG71.2|UTP20_MOUSERecName: Full=Small subunit processome component 20 homolog; AltName: Full=Down-regulated in metastasis protein	Q5XG71	6.79102e-11	71	65.855	60	43
THRIPS_11_08_2011_00253	epc1_human ame: full=enhancer of polycomb homolog 1	2413	gi|59797889|sp|Q9H2F5.1|EPC1_HUMANRecName: Full=Enhancer of polycomb homolog 1	Q9H2F5	1.90781e-79	76	297.745	256	197
THRIPS_11_08_2011_00256	bag family molecular chaperone regulator 3	519	gi|156550725|ref|XP_001605957.1|PREDICTED: similar to ENSANGP00000011440 [Nasonia vitripennis]	XP_001605957	3.51386e-11	53	71.633	128	68
THRIPS_11_08_2011_00257	ef1a2_drome ame: full=elongation factor 1-alpha 2 short=ef-1-alpha-2	279	gi|45644942|sp|P05303.2|EF1A2_DROMERecName: Full=Elongation factor 1-alpha 2; Short=EF-1-alpha-2	P05303	8.22076e-33	80	138.658	93	75
THRIPS_11_08_2011_00263	atpf1_danre ame: full=atp synthase mitochondrial f1 complex assembly factor 1 flags: precursor	208	gi|190358762|sp|Q1L987.2|ATPF1_DANRERecName: Full=ATP synthase mitochondrial F1 complex assembly factor 1; Flags: Precursor	Q1L987	1.23389e-12	67	71.633	59	40
THRIPS_11_08_2011_00264	arrestin domain containing 4	704	gi|157118098|ref|XP_001659007.1|hypothetical protein AaeL_AAEL008185 [Aedes aegypti] >gi|108875859|gb|EAT40084.1| conserved hypothetical protein [Aedes aegypti]	XP_001659007	2.66155e-19	51	99.7525	236	121
THRIPS_11_08_2011_00268	ext3_drome ame: full=exostosin-3 ame: full=protein brother of tout-velu	212	gi|61212928|sp|Q9XZ08.1|EXT3_DROMERecName: Full=Exostosin-3; AltName: Full=Protein brother of tout-velu	Q9XZ08	9.69508e-18	82	88.5817	67	55
THRIPS_11_08_2011_00272	sodium-coupled neutral amino acid transporter 10	1821	gi|91079298|ref|XP_966796.1|PREDICTED: similar to GA15814-PA [Tribolium castaneum] >gi|270004319|gb|EFA00767.1| hypothetical protein TcasGA2_TC003653 [Tribolium castaneum]	XP_966796	2.88963e-09	45	68.5514	315	144
THRIPS_11_08_2011_00275	cl066_xenla ame: full=upf0536 protein c12orf66 homolog	208	gi|82185094|sp|Q6IR80.1|CL066_XENLARecName: Full=UPF0536 protein C12orf66 homolog	Q6IR80	1.72575e-06	59	51.2174	69	41
THRIPS_11_08_2011_00279	zfh1_drome ame: full=zinc finger protein 1 ame: full=zinc finger homeodomain protein 1	206	gi|45644976|sp|P28166.2|ZFH1_DROMERecName: Full=Zinc finger protein 1; AltName: Full=Zinc finger homeodomain protein 1	P28166	3.45315e-31	95	133.265	61	58
THRIPS_11_08_2011_00283	pp4r1_mouse ame: full=serine threonine-protein phosphatase 4 regulatory subunit 1	497	gi|44888281|sp|Q8K2V1.2|PP4R1_MOUSERecName: Full=Serine/threonine-protein phosphatase 4 regulatory subunit 1	Q8K2V1	2.69108e-17	61	87.8113	114	70
THRIPS_11_08_2011_00287	wrip1_human ame: full=atpase wrnip1 ame: full=werner helicase-interacting protein 1	206	gi|73622085|sp|Q96S55.2|WRIP1_HUMANRecName: Full=ATPase WRNIP1; AltName: Full=Werner helicase-interacting protein 1	Q96S55	1.18959e-23	85	108.227	68	58
THRIPS_11_08_2011_00289	e3 ubiquitin ligase	207	gi|189235542|ref|XP_001812033.1|PREDICTED: similar to ring finger protein 216 [Tribolium castaneum]	XP_001812033	1.23717e-07	68	59.6918	70	48
THRIPS_11_08_2011_00290	hypothetical protein ECU11_0580 [Encephalitozoon cuniculi GB-M1]	208	gi|19074858|ref|NP_586364.1|hypothetical protein ECU11_0580 [Encephalitozoon cuniculi GB-M1] >gi|19069583|emb|CAD25968.1| hypothetical protein [Encephalitozoon cuniculi GB-M1]	NP_586364	1.46142e-08	68	62.7734	63	43
THRIPS_11_08_2011_00292	fxl14_human ame: full=f-box lrr-repeat protein 14 ame: full=f-box and leucine-rich repeat protein 14	208	gi|48428083|sp|Q8N1E6.1|FXL14_HUMANRecName: Full=F-box/LRR-repeat protein 14; AltName: Full=F-box and leucine-rich repeat protein 14	Q8N1E6	9.12949e-16	80	82.0333	67	54
THRIPS_11_08_2011_00293	prp17_human ame: full=pre-mrna-processing factor 17 ame: full=cell division cycle 40 homolog ame: full=eh-binding protein 3 short=ehb3 ame: full=prp17 homolog short=hprp17	207	gi|17380181|sp|O60508.1|PRP17_HUMANRecName: Full=Pre-mRNA-processing factor 17; AltName: Full=Cell division cycle 40 homolog; AltName: Full=EH-binding protein 3; Short=Ehb3; AltName: Full=PRP17 homolog; Short=hPRP17	O60508	5.71431e-10	66	62.7734	69	46
THRIPS_11_08_2011_00294	xpo2_pagma ame: full=exportin-2 short=exp2 ame: full=cellular apoptosis susceptibility protein ame: full=chromosome segregation 1-like protein ame: full=importin-alpha re-exporter	455	gi|20138049|sp|Q9PTU3.1|XPO2_PAGMARecName: Full=Exportin-2; Short=Exp2; AltName: Full=Cellular apoptosis susceptibility protein; AltName: Full=Chromosome segregation 1-like protein; AltName: Full=Importin-alpha re-exporter	Q9PTU3	8.18975e-36	83	107.842	77	64
THRIPS_11_08_2011_00297	ubp34_mouse ame: full=ubiquitin carboxyl-terminal hydrolase 34 ame: full=deubiquitinating enzyme 34 ame: full=ubiquitin thiolesterase 34 ame: full=ubiquitin-specific-processing protease 34	207	gi|212276489|sp|Q6ZQ93.3|UBP34_MOUSERecName: Full=Ubiquitin carboxyl-terminal hydrolase 34; AltName: Full=Deubiquitinating enzyme 34; AltName: Full=Ubiquitin thiolesterase 34; AltName: Full=Ubiquitin-specific-processing protease 34	Q6ZQ93	4.09805e-16	76	83.1889	69	53
THRIPS_11_08_2011_00301	al7a1_rat ame: full=alpha-aminoadipic semialdehyde dehydrogenase short=alpha-aasa dehydrogenase ame: full=aldehyde dehydrogenase family 7 member a1 ame: full=antiquitin-1 ame: full=betaine aldehyde dehydrogenase ame: full=delta1-piperideine-6-carboxylate dehydrogenase short=p6c dehydrogenase flags: precursor	295	gi|294862408|sp|Q64057.2|AL7A1_RATRecName: Full=Alpha-aminoadipic semialdehyde dehydrogenase; Short=Alpha-AASA dehydrogenase; AltName: Full=Aldehyde dehydrogenase family 7 member A1; AltName: Full=Antiquitin-1; AltName: Full=Betaine aldehyde dehydrogenase; AltName: Full=Delta1-piperideine-6-carboxylate dehydrogenase; Short=P6c dehydrogenase; Flags: Precursor	Q64057	3.39465e-23	80	106.686	77	62
THRIPS_11_08_2011_00304	rnz_drome ame: full=ribonuclease mitochondrial short=rnase z ame: full=juvenile hormone-inducible protein 1 ame: full=drnase z ame: full=trna 3 endonuclease short= ame: full=trnase z flags: precursor	574	gi|42559651|sp|Q8MKW7.2|RNZ_DROMERecName: Full=Ribonuclease Z, mitochondrial; Short=RNase Z; AltName: Full=Juvenile hormone-inducible protein 1; AltName: Full=dRNAse Z; AltName: Full=tRNA 3 endonuclease; Short=DmeZ; AltName: Full=tRNase Z; Flags: Precursor	Q8MKW7	2.19742e-17	59	88.5817	121	72
THRIPS_11_08_2011_00307	hus1 checkpoint homolog ( pombe) isoform 2	206	gi|126336291|ref|XP_001367393.1|PREDICTED: similar to HUS1 checkpoint homolog (S. pombe) isoform 2 [Monodelphis domestica]	XP_001367393	8.89562e-06	69	53.5286	46	32
THRIPS_11_08_2011_00313	nagk_human ame: full=n-acetyl-d-glucosamine kinase short=n-acetylglucosamine kinase ame: full= c kinase	309	gi|24638065|sp|Q9UJ70.4|NAGK_HUMANRecName: Full=N-acetyl-D-glucosamine kinase; Short=N-acetylglucosamine kinase; AltName: Full=GlcNAc kinase	Q9UJ70	4.85257e-09	58	59.6918	72	42
THRIPS_11_08_2011_00314	cobl-like 1	427	gi|193664512|ref|XP_001943347.1|PREDICTED: similar to Cobl-like 1 (predicted) [Acyrthosiphon pisum]	XP_001943347	1.16436e-13	79	79.7221	58	46
THRIPS_11_08_2011_00315	3-mercaptopyruvate sulfurtransferase-like	362	gi|156552057|ref|XP_001604123.1|PREDICTED: similar to CG6000-PA [Nasonia vitripennis]	XP_001604123	1.61308e-07	79	59.3066	43	34
THRIPS_11_08_2011_00316	efts_human ame: full=elongation factor mitochondrial short=ef-ts short=ef- t flags: precursor	611	gi|12644268|sp|P43897.2|EFTS_HUMANRecName: Full=Elongation factor Ts, mitochondrial; Short=EF-Ts; Short=EF-TsMt; Flags: Precursor	P43897	8.38015e-13	55	73.559	125	69
THRIPS_11_08_2011_00318	cubn_canfa ame: full=cubilin flags: precursor	1468	gi|75074852|sp|Q9TU53.1|CUBN_CANFARecName: Full=Cubilin; Flags: Precursor	Q9TU53	3.91267e-34	50	146.362	345	175
THRIPS_11_08_2011_00319	ap3m1_human ame: full=ap-3 complex subunit mu-1 ame: full=ap-3 adapter complex mu3a subunit ame: full=adapter-related protein complex 3 mu-1 subunit ame: full=mu-adaptin 3a ame: full=mu3a-adaptin	1554	gi|13123952|sp|Q9Y2T2.1|AP3M1_HUMANRecName: Full=AP-3 complex subunit mu-1; AltName: Full=AP-3 adapter complex mu3A subunit; AltName: Full=Adapter-related protein complex 3 mu-1 subunit; AltName: Full=Mu-adaptin 3A; AltName: Full=Mu3A-adaptin >gi|75040912|sp|Q5R478.1|AP3M1_PONAB RecName: Full=AP-3 complex subunit mu-1; AltName: Full=AP-3 adapter complex mu3A subunit; AltName: Full=Adapter-related…	Q9Y2T2	0	86	653.284	417	362
THRIPS_11_08_2011_00322	ki16b_human ame: full=kinesin-like protein kif16b ame: full=sorting nexin-23	885	gi|50403793|sp|Q96L93.2|KI16B_HUMANRecName: Full=Kinesin-like protein KIF16B; AltName: Full=Sorting nexin-23	Q96L93	7.71057e-72	68	166.777	154	106
THRIPS_11_08_2011_00323	tba_xenla ame: full=tubulin alpha chain	256	gi|117949832|sp|P08537.2|TBA_XENLARecName: Full=Tubulin alpha chain	P08537	1.92983e-42	97	170.629	84	82
THRIPS_11_08_2011_00325	mediator of rna polymerase ii transcription subunit 16	200	gi|307171840|gb|EFN63495.1|Mediator of RNA polymerase II transcription subunit 16 [Camponotus floridanus]	EFN63495	9.87751e-13	71	76.6406	60	43
THRIPS_11_08_2011_00327	-like protein subfamily c member 14	2261	gi|156552732|ref|XP_001599524.1|PREDICTED: similar to GA13147-PA [Nasonia vitripennis]	XP_001599524	2.59657e-18	42	98.9821	362	154
THRIPS_11_08_2011_00328	tex10_chick ame: full=testis-expressed sequence 10 protein homolog	865	gi|71153592|sp|Q5ZM41.1|TEX10_CHICKRecName: Full=Testis-expressed sequence 10 protein homolog	Q5ZM41	3.33247e-23	62	108.997	145	90
THRIPS_11_08_2011_00330	psa6_mouse ame: full=proteasome subunit alpha type-6 ame: full=macropain iota chain ame: full=multicatalytic endopeptidase complex iota chain ame: full=proteasome iota chain	1222	gi|9910829|sp|Q9QUM9.1|PSA6_MOUSERecName: Full=Proteasome subunit alpha type-6; AltName: Full=Macropain iota chain; AltName: Full=Multicatalytic endopeptidase complex iota chain; AltName: Full=Proteasome iota chain	Q9QUM9	6.30298e-104	87	377.867	246	216
THRIPS_11_08_2011_00333	crb_drome ame: full=protein crumbs ame: full=95f flags: precursor	1361	gi|68067441|sp|P10040.3|CRB_DROMERecName: Full=Protein crumbs; AltName: Full=95F; Flags: Precursor	P10040	1.08722e-91	62	337.421	328	205
THRIPS_11_08_2011_00340	pld1_mouse ame: full=phospholipase d1 short=pld 1 short=mpld1 ame: full=choline phosphatase 1 ame: full=phosphatidylcholine-hydrolyzing phospholipase d1	201	gi|13124458|sp|Q9Z280.1|PLD1_MOUSERecName: Full=Phospholipase D1; Short=PLD 1; Short=mPLD1; AltName: Full=Choline phosphatase 1; AltName: Full=Phosphatidylcholine-hydrolyzing phospholipase D1	Q9Z280	3.84989e-22	85	103.219	64	55
THRIPS_11_08_2011_00344	transcriptional regulator atrx (x-linked helicase ii)	386	gi|157114744|ref|XP_001652400.1|transcriptional regulator ATRX (X-linked helicase II) [Aedes aegypti] >gi|108883553|gb|EAT47778.1| transcriptional regulator ATRX (X-linked helicase II) [Aedes aegypti]	XP_001652400	4.70272e-07	55	57.7658	135	75
THRIPS_11_08_2011_00345	cdc73_rat ame: full=parafibromin ame: full=cell division cycle protein 73 homolog ame: full=hyperparathyroidism 2 protein homolog	292	gi|81908680|sp|Q4V8C8.1|CDC73_RATRecName: Full=Parafibromin; AltName: Full=Cell division cycle protein 73 homolog; AltName: Full=Hyperparathyroidism 2 protein homolog	Q4V8C8	7.83359e-28	88	122.094	76	67
THRIPS_11_08_2011_00346	rbl1_human ame: full=retinoblastoma-like protein 1 ame: full=107 kda retinoblastoma-associated protein short=p107 ame: full=prb1	223	gi|90103515|sp|P28749.3|RBL1_HUMANRecName: Full=Retinoblastoma-like protein 1; AltName: Full=107 kDa retinoblastoma-associated protein; Short=p107; AltName: Full=pRb1	P28749	2.69898e-12	64	70.4774	74	48
THRIPS_11_08_2011_00347	lmbrl_mouse ame: full=protein lmbr1l ame: full=uteroglobin receptor	712	gi|81881208|sp|Q9D1E5.1|LMBRL_MOUSERecName: Full=Protein LMBR1L; AltName: Full=Uteroglobin receptor	Q9D1E5	6.9681e-30	55	87.4261	148	82
THRIPS_11_08_2011_00348	pb1_chick ame: full=protein polybromo-1	1968	gi|82107536|sp|Q90941.1|PB1_CHICKRecName: Full=Protein polybromo-1	Q90941	1.29657e-22	61	108.612	123	76
THRIPS_11_08_2011_00350	yif1b_human ame: full=protein yif1b ame: full=yip1-interacting factor homolog b	1674	gi|121944384|sp|Q5BJH7.1|YIF1B_HUMANRecName: Full=Protein YIF1B; AltName: Full=YIP1-interacting factor homolog B	Q5BJH7	1.93538e-32	71	140.969	121	86
THRIPS_11_08_2011_00351	protein mical-	382	gi|110760587|ref|XP_396755.3|PREDICTED: similar to MICAL CG33208-PB, isoform B isoform 1 [Apis mellifera]	XP_396755	7.0393e-11	73	70.4774	64	47
THRIPS_11_08_2011_00355	caz_drome ame: full=rna-binding protein cabeza ame: full=p19 ame: full=sarcoma-associated rna-binding fly homolog	769	gi|47117804|sp|Q27294.2|CAZ_DROMERecName: Full=RNA-binding protein cabeza; AltName: Full=P19; AltName: Full=Sarcoma-associated RNA-binding fly homolog	Q27294	2.24117e-33	84	142.51	95	80
THRIPS_11_08_2011_00357	peritrophin-like protein	550	gi|170056841|ref|XP_001864214.1|conserved hypothetical protein [Culex quinquefasciatus] >gi|167876501|gb|EDS39884.1| conserved hypothetical protein [Culex quinquefasciatus]	XP_001864214	1.47524e-11	52	73.1738	118	62
THRIPS_11_08_2011_00363	PREDICTED: similar to transposase [Strongylocentrotus purpuratus]	529	gi|115941764|ref|XP_001191653.1|PREDICTED: similar to transposase [Strongylocentrotus purpuratus]	XP_001191653	1.74354e-08	44	62.7734	179	79
THRIPS_11_08_2011_00364	taok1_mouse ame: full=serine threonine-protein kinase tao1 ame: full=thousand and one amino acid protein 1	979	gi|78099177|sp|Q5F2E8.1|TAOK1_MOUSERecName: Full=Serine/threonine-protein kinase TAO1; AltName: Full=Thousand and one amino acid protein 1	Q5F2E8	5.9657e-136	87	483.797	302	265
THRIPS_11_08_2011_00367	spag1_human ame: full=sperm-associated antigen 1 ame: full=hsd- ame: full=infertility-related sperm protein spag-1	613	gi|223634718|sp|Q07617.3|SPAG1_HUMANRecName: Full=Sperm-associated antigen 1; AltName: Full=HSD-3.8; AltName: Full=Infertility-related sperm protein Spag-1	Q07617	4.64832e-11	60	67.781	106	64
THRIPS_11_08_2011_00368	rac1_rat ame: full=ras-related c3 botulinum toxin substrate 1 ame: full=p21-rac1 flags: precursor	3631	gi|51701705|sp|Q6RUV5.1|RAC1_RATRecName: Full=Ras-related C3 botulinum toxin substrate 1; AltName: Full=p21-Rac1; Flags: Precursor >gi|51702785|sp|P62998.1|RAC1_BOVIN RecName: Full=Ras-related C3 botulinum toxin substrate 1; AltName: Full=p21-Rac1; Flags: Precursor >gi|51702786|sp|P62999.1|RAC1_CANFA RecName: Full=Ras-related C3 botulinum toxin substrate 1; AltName: Full=Rac2; AltName: Full=p21-R…	Q6RUV5	1.80758e-100	96	368.237	192	185
THRIPS_11_08_2011_00369	mnb_drome ame: full=serine threonine-protein kinase minibrain	1194	gi|73620974|sp|P49657.2|MNB_DROMERecName: Full=Serine/threonine-protein kinase minibrain	P49657	5.45502e-20	95	98.9821	49	47
THRIPS_11_08_2011_00370	mitogen-activated protein kinase kinase kinase 7-interacting protein 2	1904	gi|307170735|gb|EFN62860.1|Mitogen-activated protein kinase kinase kinase 7-interacting protein 2 [Camponotus floridanus]	EFN62860	6.34512e-07	39	60.8474	171	68
THRIPS_11_08_2011_00371	k1109_mouse ame: full=uncharacterized protein kiaa1109 ame: full=fragile site-associated protein homolog	1032	gi|262527574|sp|A2AAE1.3|K1109_MOUSERecName: Full=Uncharacterized protein KIAA1109; AltName: Full=Fragile site-associated protein homolog	A2AAE1	1.488e-15	67	83.9593	95	64
THRIPS_11_08_2011_00375	rheb_drome ame: full=gtp-binding protein rheb homolog flags: precursor	3234	gi|9297057|sp|Q9VND8.1|RHEB_DROMERecName: Full=GTP-binding protein Rheb homolog; Flags: Precursor	Q9VND8	2.31282e-68	85	260.766	166	142
THRIPS_11_08_2011_00379	urfb1_human ame: full=uhrf1-binding protein 1 ame: full=icbp90-binding protein 1 ame: full=ubiquitin-like containing phd and ring finger domains 1-binding protein 1	1438	gi|67462038|sp|Q6BDS2.1|URFB1_HUMANRecName: Full=UHRF1-binding protein 1; AltName: Full=ICBP90-binding protein 1; AltName: Full=Ubiquitin-like containing PHD and RING finger domains 1-binding protein 1	Q6BDS2	2.11751e-08	57	60.8474	85	49
THRIPS_11_08_2011_00380	clld6_human ame: full=chronic lymphocytic leukemia deletion region gene 6 protein short=cll deletion region gene 6 protein	896	gi|109821809|sp|Q5W111.2|CLLD6_HUMANRecName: Full=Chronic lymphocytic leukemia deletion region gene 6 protein; Short=CLL deletion region gene 6 protein	Q5W111	1.85169e-24	59	113.235	145	86
THRIPS_11_08_2011_00381	xbp1_human ame: full=x-box-binding protein 1 short=xbp-1 ame: full=tax-responsive element-binding protein 5	1404	gi|60416406|sp|P17861.2|XBP1_HUMANRecName: Full=X-box-binding protein 1; Short=XBP-1; AltName: Full=Tax-responsive element-binding protein 5	P17861	2.75982e-13	50	77.0258	171	86
THRIPS_11_08_2011_00383	plpl2_mouse ame: full=patatin-like phospholipase domain-containing protein 2 ame: full=adipose triglyceride lipase ame: full=desnutrin	2290	gi|81896337|sp|Q8BJ56.1|PLPL2_MOUSERecName: Full=Patatin-like phospholipase domain-containing protein 2; AltName: Full=Adipose triglyceride lipase; AltName: Full=Desnutrin	Q8BJ56	1.30093e-53	60	211.846	291	175
THRIPS_11_08_2011_00384	gst1_blage ame: full=glutathione s-transferase ame: full=gst class-sigma ame: full=major allergen bla g 5 ame: allergen=bla g 5	773	gi|6225491|sp|O18598.3|GST1_BLAGERecName: Full=Glutathione S-transferase; AltName: Full=GST class-sigma; AltName: Full=Major allergen Bla g 5; AltName: Allergen=Bla g 5	O18598	4.37417e-53	63	207.994	203	129
THRIPS_11_08_2011_00385	pgm_drome ame: full=phosphoglucomutase short=pgm ame: full=glucose phosphomutase	2096	gi|74871103|sp|Q9VUY9.1|PGM_DROMERecName: Full=Phosphoglucomutase; Short=PGM; AltName: Full=Glucose phosphomutase	Q9VUY9	0	78	586.26	442	349
THRIPS_11_08_2011_00387	erlec_mouse ame: full=endoplasmic reticulum lectin 1 ame: full=er lectin short=erlectin flags: precursor	2283	gi|76363478|sp|Q8VEH8.1|ERLEC_MOUSERecName: Full=Endoplasmic reticulum lectin 1; AltName: Full=ER lectin; Short=Erlectin; Flags: Precursor	Q8VEH8	1.3696e-95	58	351.288	463	273
THRIPS_11_08_2011_00388	sqstm_ponab ame: full=sequestosome-1 ame: full=ubiquitin-binding protein p62	2376	gi|75055057|sp|Q5RBA5.1|SQSTM_PONABRecName: Full=Sequestosome-1; AltName: Full=Ubiquitin-binding protein p62	Q5RBA5	2.41513e-10	59	68.1662	64	38
THRIPS_11_08_2011_00392	erap1_human ame: full=endoplasmic reticulum aminopeptidase 1 ame: full=arts-1 ame: full=adipocyte-derived leucine aminopeptidase short=a-lap ame: full=aminopeptidase pils ame: full=puromycin-insensitive leucyl-specific aminopeptidase short=pils-ap ame: full=type 1 tumor necrosis factor receptor shedding aminopeptidase regulator	334	gi|158937334|sp|Q9NZ08.3|ERAP1_HUMANRecName: Full=Endoplasmic reticulum aminopeptidase 1; AltName: Full=ARTS-1; AltName: Full=Adipocyte-derived leucine aminopeptidase; Short=A-LAP; AltName: Full=Aminopeptidase PILS; AltName: Full=Puromycin-insensitive leucyl-specific aminopeptidase; Short=PILS-AP; AltName: Full=Type 1 tumor necrosis factor receptor shedding aminopeptidase regulator	Q9NZ08	4.27551e-13	69	73.1738	73	51
THRIPS_11_08_2011_00396	lola4_drome ame: full=longitudinals lacking isoforms f i k t	327	gi|73920872|sp|Q867Z4.1|LOLA4_DROMERecName: Full=Longitudinals lacking protein, isoforms F/I/K/T	Q867Z4	1.53491e-07	53	54.6842	76	41
THRIPS_11_08_2011_00398	ki21a_human ame: full=kinesin-like protein kif21a ame: full=kinesin-like protein kif2 ame: full=renal carcinoma antigen ny-ren-62	323	gi|50400977|sp|Q7Z4S6.2|KI21A_HUMANRecName: Full=Kinesin-like protein KIF21A; AltName: Full=Kinesin-like protein KIF2; AltName: Full=Renal carcinoma antigen NY-REN-62	Q7Z4S6	6.88134e-24	75	108.997	107	81
THRIPS_11_08_2011_00399	e41l5_mouse ame: full=band -like protein 5	319	gi|81873727|sp|Q8BGS1.1|E41L5_MOUSERecName: Full=Band 4.1-like protein 5	Q8BGS1	1.71436e-06	58	51.2174	74	43
THRIPS_11_08_2011_00400	zn622_human ame: full=zinc finger protein 622 ame: full=zinc finger-like protein 9	1029	gi|50401777|sp|Q969S3.1|ZN622_HUMANRecName: Full=Zinc finger protein 622; AltName: Full=Zinc finger-like protein 9	Q969S3	4.77563e-22	70	105.531	82	58
THRIPS_11_08_2011_00401	tmede_droya ame: full=transmembrane emp24 domain-containing protein eca flags: precursor	1549	gi|296439799|sp|B4PVC6.1|TMEDE_DROYARecName: Full=Transmembrane emp24 domain-containing protein eca; Flags: Precursor	B4PVC6	3.85774e-88	88	325.865	212	187
THRIPS_11_08_2011_00402	glcm_mouse ame: full=glucosylceramidase ame: full=acid beta-glucosidase ame: full=beta-glucocerebrosidase ame: full=d-glucosyl-n-acylsphingosine glucohydrolase flags: precursor	1428	gi|121284|sp|P17439.1|GLCM_MOUSERecName: Full=Glucosylceramidase; AltName: Full=Acid beta-glucosidase; AltName: Full=Beta-glucocerebrosidase; AltName: Full=D-glucosyl-N-acylsphingosine glucohydrolase; Flags: Precursor	P17439	8.32557e-82	60	304.679	384	231
THRIPS_11_08_2011_00405	lipp_pig ame: full=pancreatic triacylglycerol lipase short=pl short=pancreatic lipase	2945	gi|6686288|sp|P00591.2|LIPP_PIGRecName: Full=Pancreatic triacylglycerol lipase; Short=PL; Short=Pancreatic lipase	P00591	1.16622e-25	44	119.398	300	134
THRIPS_11_08_2011_00407	snx29_human ame: full=sorting nexin-29	854	gi|156633630|sp|Q8TEQ0.2|SNX29_HUMANRecName: Full=Sorting nexin-29	Q8TEQ0	1.31015e-55	74	139.428	124	92
THRIPS_11_08_2011_00411	asna_culqu ame: full=atpase asna1 homolog ame: full=arsenical pump-driving atpase homolog ame: full=arsenite-stimulated atpase	1879	gi|263406173|sp|B0WEV5.1|ASNA_CULQURecName: Full=ATPase ASNA1 homolog; AltName: Full=Arsenical pump-driving ATPase homolog; AltName: Full=Arsenite-stimulated ATPase	B0WEV5	4.07063e-135	89	482.256	332	298
THRIPS_11_08_2011_00413	dctn2_aedae ame: full=probable dynactin subunit 2	944	gi|158705947|sp|Q1HQF2.2|DCTN2_AEDAERecName: Full=Probable dynactin subunit 2	Q1HQF2	9.95147e-40	52	164.081	294	154
THRIPS_11_08_2011_00414	vpp1_xentr ame: full=v-type proton atpase 116 kda subunit a isoform 1 short=v-atpase 116 kda isoform a1 ame: full=vacuolar proton translocating atpase 116 kda subunit a isoform 1	3082	gi|167016682|sp|A1A5G6.1|VPP1_XENTRRecName: Full=V-type proton ATPase 116 kDa subunit a isoform 1; Short=V-ATPase 116 kDa isoform a1; AltName: Full=Vacuolar proton translocating ATPase 116 kDa subunit a isoform 1	A1A5G6	0	66	815.453	861	572
THRIPS_11_08_2011_00415	tcpb_bovin ame: full=t-complex protein 1 subunit beta short=tcp-1-beta ame: full=cct-beta	2012	gi|115305838|sp|Q3ZBH0.3|TCPB_BOVINRecName: Full=T-complex protein 1 subunit beta; Short=TCP-1-beta; AltName: Full=CCT-beta	Q3ZBH0	0	86	749.969	533	460
THRIPS_11_08_2011_00416	s22bb_danre ame: full=vesicle-trafficking protein sec22b-b ame: full=sec22 vesicle-trafficking protein homolog b-b	2054	gi|82187641|sp|Q7SXP0.1|S22BB_DANRERecName: Full=Vesicle-trafficking protein SEC22b-B; AltName: Full=SEC22 vesicle-trafficking protein homolog B-B	Q7SXP0	3.42886e-74	81	280.026	199	163
THRIPS_11_08_2011_00417	pgbm_mouse ame: full=basement membrane-specific heparan sulfate proteoglycan core protein short=hspg contains: ame: full=endorepellin contains: ame: full=lg3 peptide flags: precursor	13852	gi|1172451|sp|Q05793.1|PGBM_MOUSERecName: Full=Basement membrane-specific heparan sulfate proteoglycan core protein; Short=HSPG; Contains: RecName: Full=Endorepellin; Contains: RecName: Full=LG3 peptide; Flags: Precursor	Q05793	0	44	1072.38	2584	1146
THRIPS_11_08_2011_00418	copd_mouse ame: full=coatomer subunit delta ame: full=archain ame: full=delta-coat protein short=delta-cop	2812	gi|81883877|sp|Q5XJY5.1|COPD_MOUSERecName: Full=Coatomer subunit delta; AltName: Full=Archain; AltName: Full=Delta-coat protein; Short=Delta-COP	Q5XJY5	5.03236e-95	76	349.747	296	227
THRIPS_11_08_2011_00419	tre12_drose ame: full=facilitated trehalose transporter tret1-2 homolog	2029	gi|300681181|sp|B4HNS1.1|TRE12_DROSERecName: Full=Facilitated trehalose transporter Tret1-2 homolog	B4HNS1	1.48054e-37	54	158.303	267	145
THRIPS_11_08_2011_00420	prps1_rat ame: full=ribose-phosphate pyrophosphokinase 1 ame: full=phosphoribosyl pyrophosphate synthase i short=prs-i	2054	gi|46397469|sp|P60892.2|PRPS1_RATRecName: Full=Ribose-phosphate pyrophosphokinase 1; AltName: Full=Phosphoribosyl pyrophosphate synthase I; Short=PRS-I >gi|46397477|sp|P60891.2|PRPS1_HUMAN RecName: Full=Ribose-phosphate pyrophosphokinase 1; AltName: Full=PPRibP; AltName: Full=Phosphoribosyl pyrophosphate synthase I; Short=PRS-I >gi|75070997|sp|Q5RFJ7.1|PRPS1_PONAB RecName: Full=Ribose-phosphate p…	P60892	1.54583e-157	93	309.686	174	163
THRIPS_11_08_2011_00421	stim_drome ame: full=stromal interaction molecule homolog flags: precursor	2525	gi|17368342|sp|P83094.1|STIM_DROMERecName: Full=Stromal interaction molecule homolog; Flags: Precursor	P83094	1.42842e-109	78	397.897	346	271
THRIPS_11_08_2011_00423	s35b2_drome ame: full=adenosine 3 -phospho 5 -phosphosulfate transporter 1 ame: full=paps transporter 1 ame: full=protein slalom	3017	gi|67461215|sp|Q9VEI3.1|S35B2_DROMERecName: Full=Adenosine 3'-phospho 5'-phosphosulfate transporter 1; AltName: Full=PAPS transporter 1; AltName: Full=Protein slalom	Q9VEI3	4.27927e-108	67	393.275	399	268
THRIPS_11_08_2011_00424	lipp_pig ame: full=pancreatic triacylglycerol lipase short=pl short=pancreatic lipase	2758	gi|6686288|sp|P00591.2|LIPP_PIGRecName: Full=Pancreatic triacylglycerol lipase; Short=PL; Short=Pancreatic lipase	P00591	2.84286e-26	45	121.324	321	145
THRIPS_11_08_2011_00426	rab10_disom ame: full=ras-related protein rab-10 short=ora1	4412	gi|131847|sp|P22127.1|RAB10_DISOMRecName: Full=Ras-related protein Rab-10; Short=ORA1	P22127	3.1378e-78	82	294.664	201	165
THRIPS_11_08_2011_00427	txtp_caeel ame: full= tricarboxylate transport mitochondrial ame: full=citrate transport protein short=ctp flags: precursor	2326	gi|465888|sp|P34519.1|TXTP_CAEELRecName: Full=Putative tricarboxylate transport protein, mitochondrial; AltName: Full=Citrate transport protein; Short=CTP; Flags: Precursor	P34519	3.31611e-113	80	409.838	296	237
THRIPS_11_08_2011_00428	ks6b1_rat ame: full=ribosomal protein s6 kinase beta-1 short=s6k-beta-1 short=s6k1 ame: full=70 kda ribosomal protein s6 kinase 1 short=p70s6k1 short=p70-s6k 1 ame: full=ribosomal protein s6 kinase i ame: full=p70 ribosomal s6 kinase alpha short=p70 s6 kinase alpha short=p70 s6k-alpha short=p70 s6ka	6084	gi|54041073|sp|P67999.1|KS6B1_RATRecName: Full=Ribosomal protein S6 kinase beta-1; Short=S6K-beta-1; Short=S6K1; AltName: Full=70 kDa ribosomal protein S6 kinase 1; Short=P70S6K1; Short=p70-S6K 1; AltName: Full=Ribosomal protein S6 kinase I; AltName: Full=p70 ribosomal S6 kinase alpha; Short=p70 S6 kinase alpha; Short=p70 S6K-alpha; Short=p70 S6KA	P67999	9.25395e-145	81	516.153	390	317
THRIPS_11_08_2011_00429	megf8_mouse ame: full=multiple epidermal growth factor-like domains protein 8 short=multiple egf-like domains protein 8 ame: full=epidermal growth factor-like protein 4 short=egf-like protein 4 flags: precursor	3498	gi|218511691|sp|P60882.2|MEGF8_MOUSERecName: Full=Multiple epidermal growth factor-like domains protein 8; Short=Multiple EGF-like domains protein 8; AltName: Full=Epidermal growth factor-like protein 4; Short=EGF-like protein 4; Flags: Precursor	P60882	0	49	789.26	1217	605
THRIPS_11_08_2011_00431	atc1_drome ame: full=calcium-transporting atpase sarcoplasmic endoplasmic reticulum type ame: full=calcium pump	7841	gi|12644163|sp|P22700.2|ATC1_DROMERecName: Full=Calcium-transporting ATPase sarcoplasmic/endoplasmic reticulum type; AltName: Full=Calcium pump	P22700	0	94	1736.85	1011	956
THRIPS_11_08_2011_00432	clh_drome ame: full=clathrin heavy chain	6138	gi|231811|sp|P29742.1|CLH_DROMERecName: Full=Clathrin heavy chain	P29742	0	92	2807.71	1683	1550
THRIPS_11_08_2011_00433	abcf1_pig ame: full=atp-binding cassette sub-family f member 1	6482	gi|56404330|sp|Q767L0.1|ABCF1_PIGRecName: Full=ATP-binding cassette sub-family F member 1	Q767L0	0	80	689.493	578	468
THRIPS_11_08_2011_00434	pal1_drome ame: full=peptidyl-alpha-hydroxyglycine alpha-amidating lyase 1 ame: full=peptidylamidoglycolate lyase 1 ame: full=dpal1 flags: precursor	3993	gi|74867287|sp|Q9V5E1.1|PAL1_DROMERecName: Full=Peptidyl-alpha-hydroxyglycine alpha-amidating lyase 1; AltName: Full=Peptidylamidoglycolate lyase 1; AltName: Full=dPAL1; Flags: Precursor	Q9V5E1	3.78054e-91	64	337.421	375	242
THRIPS_11_08_2011_00435	lrp2_human ame: full=low-density lipoprotein receptor-related protein 2 short=lrp-2 ame: full=glycoprotein 330 short=gp330 ame: full=megalin flags: precursor	3407	gi|160332309|sp|P98164.3|LRP2_HUMANRecName: Full=Low-density lipoprotein receptor-related protein 2; Short=LRP-2; AltName: Full=Glycoprotein 330; Short=gp330; AltName: Full=Megalin; Flags: Precursor	P98164	0	62	983.015	1137	711
THRIPS_11_08_2011_00437	sap_human ame: full=proactivator polypeptide contains: ame: full=saposin-a ame: full=protein a contains: ame: full=saposin-b-val contains: ame: full=saposin-b ame: full=cerebroside sulfate activator short=csact ame: full=dispersin ame: full=sphingolipid activator protein 1 short=sap-1 ame: full=sulfatide gm1 activator contains: ame: full=saposin-c ame: full=a1 activator ame: full=co-beta-glucosid…	3292	gi|134218|sp|P07602.2|SAP_HUMANRecName: Full=Proactivator polypeptide; Contains: RecName: Full=Saposin-A; AltName: Full=Protein A; Contains: RecName: Full=Saposin-B-Val; Contains: RecName: Full=Saposin-B; AltName: Full=Cerebroside sulfate activator; Short=CSAct; AltName: Full=Dispersin; AltName: Full=Sphingolipid activator protein 1; Short=SAP-1; AltName: Full=Sulfatide/GM1 activator; Contains: R…	P07602	2.47353e-40	44	168.318	443	195
THRIPS_11_08_2011_00438	sumf1_bovin ame: full=sulfatase-modifying factor 1 ame: full=c-alpha-formylglycine-generating enzyme 1 flags: precursor	4157	gi|122144266|sp|Q0P5L5.1|SUMF1_BOVINRecName: Full=Sulfatase-modifying factor 1; AltName: Full=C-alpha-formylglycine-generating enzyme 1; Flags: Precursor	Q0P5L5	1.61638e-68	77	262.307	196	152
THRIPS_11_08_2011_00440	tryb_droer ame: full=trypsin beta flags: precursor	1867	gi|1717783|sp|P54625.1|TRYB_DROERRecName: Full=Trypsin beta; Flags: Precursor	P54625	1.8719e-31	57	137.887	231	132
THRIPS_11_08_2011_00442	unc89_caeel ame: full=muscle m-line assembly protein unc-89 ame: full=uncoordinated protein 89	1795	gi|82583720|sp|O01761.3|UNC89_CAEELRecName: Full=Muscle M-line assembly protein unc-89; AltName: Full=Uncoordinated protein 89	O01761	1.3823e-07	38	58.5362	315	121
THRIPS_11_08_2011_00443	coac_mouse ame: full=phosphopantothenoylcysteine decarboxylase short=ppc-dc ame: full=	931	gi|67460399|sp|Q8BZB2.1|COAC_MOUSERecName: Full=Phosphopantothenoylcysteine decarboxylase; Short=PPC-DC; AltName: Full=CoaC	Q8BZB2	1.44691e-59	75	229.95	197	149
THRIPS_11_08_2011_00445	cox42_thuob ame: full=cytochrome c oxidase subunit 4 isoform mitochondrial ame: full=cytochrome c oxidase subunit iv isoform 2 short=cox iv-2 flags: precursor	1527	gi|20141411|sp|P80971.2|COX42_THUOBRecName: Full=Cytochrome c oxidase subunit 4 isoform 2, mitochondrial; AltName: Full=Cytochrome c oxidase subunit IV isoform 2; Short=COX IV-2; Flags: Precursor	P80971	8.61952e-16	46	85.5001	173	81
THRIPS_11_08_2011_00446	lip1_drome ame: full=lipase 1 short= ip1 flags: precursor	1602	gi|12643565|sp|O46107.2|LIP1_DROMERecName: Full=Lipase 1; Short=DmLip1; Flags: Precursor	O46107	1.59739e-60	52	234.187	360	190
THRIPS_11_08_2011_00447	amya_droma ame: full=alpha-amylase a ame: full= -alpha-d-glucan glucanohydrolase flags: precursor	1531	gi|1703299|sp|P54215.1|AMYA_DROMARecName: Full=Alpha-amylase A; AltName: Full=1,4-alpha-D-glucan glucanohydrolase; Flags: Precursor	P54215	1.36338e-178	75	626.32	472	358
THRIPS_11_08_2011_00449	rpn2_ponab ame: full=dolichyl-diphosphooligosaccharide--protein glycosyltransferase subunit 2 ame: full=dolichyl-diphosphooligosaccharide--protein glycosyltransferase 63 kda subunit ame: full=ribophorin ii short=rpn-ii ame: full=ribophorin-2 flags: precursor	1772	gi|75042051|sp|Q5RBM1.1|RPN2_PONABRecName: Full=Dolichyl-diphosphooligosaccharide--protein glycosyltransferase subunit 2; AltName: Full=Dolichyl-diphosphooligosaccharide--protein glycosyltransferase 63 kDa subunit; AltName: Full=Ribophorin II; Short=RPN-II; AltName: Full=Ribophorin-2; Flags: Precursor	Q5RBM1	2.89203e-50	66	200.29	235	156
THRIPS_11_08_2011_00450	rab5c_canfa ame: full=ras-related protein rab-5c	2941	gi|1710027|sp|P51147.1|RAB5C_CANFARecName: Full=Ras-related protein Rab-5C	P51147	8.74476e-90	86	332.413	215	186
THRIPS_11_08_2011_00452	kc1a_human ame: full=casein kinase i isoform alpha short=cki-alpha ame: full=ck1	3847	gi|31077177|sp|P48729.2|KC1A_HUMANRecName: Full=Casein kinase I isoform alpha; Short=CKI-alpha; AltName: Full=CK1 >gi|47115790|sp|Q8BK63.2|KC1A_MOUSE RecName: Full=Casein kinase I isoform alpha; Short=CKI-alpha; AltName: Full=CK1	P48729	3.02849e-154	95	546.969	304	291
THRIPS_11_08_2011_00453	f261_rat ame: full=6-phosphofructo-2-kinase fructose- -biphosphatase 1 short=6pf-2-k fru- -p2ase 1 short=pfk fbpase 1 ame: full=6pf-2-k fru- -p2ase liver isozyme includes: ame: full=6-phosphofructo-2-kinase includes: ame: full=fructose- -bisphosphatase	2623	gi|119751|sp|P07953.3|F261_RATRecName: Full=6-phosphofructo-2-kinase/fructose-2,6-biphosphatase 1; Short=6PF-2-K/Fru-2,6-P2ase 1; Short=PFK/FBPase 1; AltName: Full=6PF-2-K/Fru-2,6-P2ase liver isozyme; Includes: RecName: Full=6-phosphofructo-2-kinase; Includes: RecName: Full=Fructose-2,6-bisphosphatase	P07953	5.82487e-21	74	103.605	85	63
THRIPS_11_08_2011_00455	acsf2_danre ame: full=acyl- synthetase family member mitochondrial flags: precursor	1434	gi|123914455|sp|Q0P4F7.1|ACSF2_DANRERecName: Full=Acyl-CoA synthetase family member 2, mitochondrial; Flags: Precursor	Q0P4F7	8.62818e-103	61	374.4	477	294
THRIPS_11_08_2011_00456	anr39_mouse ame: full=ankyrin repeat domain-containing protein 39	2311	gi|81904916|sp|Q9D2X0.1|ANR39_MOUSERecName: Full=Ankyrin repeat domain-containing protein 39	Q9D2X0	2.18805e-24	61	114.775	151	93
THRIPS_11_08_2011_00457	gsh1_mouse ame: full=glutamate--cysteine ligase catalytic subunit ame: full=gcs heavy chain ame: full=gamma-ecs ame: full=gamma-glutamylcysteine synthetase	1909	gi|22654254|sp|P97494.4|GSH1_MOUSERecName: Full=Glutamate--cysteine ligase catalytic subunit; AltName: Full=GCS heavy chain; AltName: Full=Gamma-ECS; AltName: Full=Gamma-glutamylcysteine synthetase	P97494	1.93874e-179	82	508.449	357	295
THRIPS_11_08_2011_00458	pp11_drome ame: full=serine threonine-protein phosphatase alpha-1 isoform	2695	gi|1346751|sp|P48461.1|PP11_DROMERecName: Full=Serine/threonine-protein phosphatase alpha-1 isoform	P48461	7.70502e-178	96	624.78	321	309
THRIPS_11_08_2011_00459	rbm10_human ame: full=rna-binding protein 10 ame: full=g patch domain-containing protein 9 ame: full=rna-binding motif protein 10 ame: full=rna-binding protein s1-1 short=s1-1	982	gi|218512116|sp|P98175.3|RBM10_HUMANRecName: Full=RNA-binding protein 10; AltName: Full=G patch domain-containing protein 9; AltName: Full=RNA-binding motif protein 10; AltName: Full=RNA-binding protein S1-1; Short=S1-1	P98175	2.34722e-15	57	83.1889	119	68
THRIPS_11_08_2011_00460	hypothetical protein TcasGA2_TC002138 [Tribolium castaneum]	913	gi|270003173|gb|EEZ99620.1|hypothetical protein TcasGA2_TC002138 [Tribolium castaneum]	EEZ99620	8.28066e-10	46	68.9366	130	61
THRIPS_11_08_2011_00461	ct108_mouse ame: full=transmembrane protein c20orf108 homolog	1583	gi|38503378|sp|Q9D8B6.2|CT108_MOUSERecName: Full=Transmembrane protein C20orf108 homolog	Q9D8B6	1.65179e-09	63	64.6994	68	43
THRIPS_11_08_2011_00464	spcs3_drome ame: full=signal peptidase complex subunit 3 ame: full=microsomal signal peptidase 22 kda subunit short=spc22 short=spase 22 kda subunit	1045	gi|17369766|sp|Q9VCA9.1|SPCS3_DROMERecName: Full=Signal peptidase complex subunit 3; AltName: Full=Microsomal signal peptidase 22 kDa subunit; Short=SPC22; Short=SPase 22 kDa subunit	Q9VCA9	8.47753e-75	86	280.796	179	155
THRIPS_11_08_2011_00466	nucleoside 2-deoxyribosyltransferase	203	gi|283853711|ref|ZP_06370940.1|nucleoside 2-deoxyribosyltransferase [Desulfovibrio sp. FW1012B] >gi|283570889|gb|EFC18920.1| nucleoside 2-deoxyribosyltransferase [Desulfovibrio sp. FW1012B]	ZP_06370940	2.59079e-13	74	78.5666	66	49
THRIPS_11_08_2011_00472	alg10_schpo ame: full=alpha- glucosyltransferase alg10 ame: full=alpha-2-glucosyltransferase alg10 ame: full=asparagine-linked glycosylation protein 10 ame: full=dolichyl-phosphoglucose-dependent glucosyltransferase alg10	340	gi|1723438|sp|Q10254.1|ALG10_SCHPORecName: Full=Alpha-1,2 glucosyltransferase alg10; AltName: Full=Alpha-2-glucosyltransferase alg10; AltName: Full=Asparagine-linked glycosylation protein 10; AltName: Full=Dolichyl-phosphoglucose-dependent glucosyltransferase alg10	Q10254	1.31998e-14	61	78.1814	94	58
THRIPS_11_08_2011_00473	nudc_mouse ame: full=nuclear migration protein nudc ame: full=nuclear distribution protein c homolog ame: full=silica-induced gene 92 protein short=sig-92	223	gi|62286986|sp|O35685.1|NUDC_MOUSERecName: Full=Nuclear migration protein nudC; AltName: Full=Nuclear distribution protein C homolog; AltName: Full=Silica-induced gene 92 protein; Short=SIG-92	O35685	4.45911e-07	82	53.1434	35	29
THRIPS_11_08_2011_00474	sodium hydrogen exchanger 3	222	gi|307171705|gb|EFN63440.1|Sodium/hydrogen exchanger 3 [Camponotus floridanus]	EFN63440	2.01383e-13	70	78.9518	64	45
THRIPS_11_08_2011_00475	bmp5_human ame: full=bone morphogenetic protein 5 short=bmp-5 flags: precursor	224	gi|115075|sp|P22003.1|BMP5_HUMANRecName: Full=Bone morphogenetic protein 5; Short=BMP-5; Flags: Precursor	P22003	3.74869e-30	87	129.798	74	65
THRIPS_11_08_2011_00481	pomt2_human ame: full=protein o-mannosyl-transferase 2 ame: full=dolichyl-phosphate-mannose--protein mannosyltransferase 2	210	gi|32171723|sp|Q9UKY4.2|POMT2_HUMANRecName: Full=Protein O-mannosyl-transferase 2; AltName: Full=Dolichyl-phosphate-mannose--protein mannosyltransferase 2	Q9UKY4	2.55134e-18	79	90.5077	69	55
THRIPS_11_08_2011_00483	zbed5_human ame: full=zinc finger bed domain-containing protein 5 ame: full=transposon-derived buster1 transposase-like protein	210	gi|150416326|sp|Q49AG3.2|ZBED5_HUMANRecName: Full=Zinc finger BED domain-containing protein 5; AltName: Full=Transposon-derived Buster1 transposase-like protein	Q49AG3	2.24027e-06	57	50.8322	63	36
THRIPS_11_08_2011_00484	zn233_human ame: full=zinc finger protein 233	232	gi|158514214|sp|A6NK53.2|ZN233_HUMANRecName: Full=Zinc finger protein 233	A6NK53	3.50896e-23	80	106.686	76	61
THRIPS_11_08_2011_00486	ctdp1_human ame: full=rna polymerase ii subunit a c-terminal domain phosphatase ame: full=tfiif-associating ctd phosphatase	230	gi|46396052|sp|Q9Y5B0.2|CTDP1_HUMANRecName: Full=RNA polymerase II subunit A C-terminal domain phosphatase; AltName: Full=TFIIF-associating CTD phosphatase	Q9Y5B0	1.52561e-18	76	91.2781	60	46
THRIPS_11_08_2011_00489	kdm6a_human ame: full=lysine-specific demethylase 6a ame: full=histone demethylase utx ame: full=ubiquitously-transcribed tpr protein on the x chromosome ame: full=ubiquitously-transcribed x chromosome tetratricopeptide repeat protein	800	gi|206729942|sp|O15550.2|KDM6A_HUMANRecName: Full=Lysine-specific demethylase 6A; AltName: Full=Histone demethylase UTX; AltName: Full=Ubiquitously-transcribed TPR protein on the X chromosome; AltName: Full=Ubiquitously-transcribed X chromosome tetratricopeptide repeat protein	O15550	6.36854e-119	86	426.787	265	228
THRIPS_11_08_2011_00498	nrbf2_human ame: full=nuclear receptor-binding factor 2 short=nrbf-2 ame: full=comodulator of ppar and rxr	211	gi|74731648|sp|Q96F24.1|NRBF2_HUMANRecName: Full=Nuclear receptor-binding factor 2; Short=NRBF-2; AltName: Full=Comodulator of PPAR and RXR	Q96F24	1.71532e-06	67	51.2174	53	36
THRIPS_11_08_2011_00499	mef2_drome ame: full=myocyte-specific enhancer factor 2 ame: full=mads domain transcription factor d-mef2	211	gi|25453445|sp|P40791.2|MEF2_DROMERecName: Full=Myocyte-specific enhancer factor 2; AltName: Full=MADS domain transcription factor D-mef2	P40791	7.38891e-34	100	142.124	70	70
THRIPS_11_08_2011_00501	rrp12_chick ame: full=rrp12-like protein	269	gi|71153786|sp|Q5ZKD5.1|RRP12_CHICKRecName: Full=RRP12-like protein	Q5ZKD5	6.39991e-09	65	59.3066	78	51
THRIPS_11_08_2011_00504	kinase suppressor of ras	219	gi|156548452|ref|XP_001605076.1|PREDICTED: similar to ENSANGP00000009647 [Nasonia vitripennis]	XP_001605076	1.35107e-14	97	82.8037	39	38
THRIPS_11_08_2011_00506	abtb1_human ame: full=ankyrin repeat and btb poz domain-containing protein 1 ame: full=elongation factor 1a-binding protein	218	gi|74751721|sp|Q969K4.1|ABTB1_HUMANRecName: Full=Ankyrin repeat and BTB/POZ domain-containing protein 1; AltName: Full=Elongation factor 1A-binding protein	Q969K4	1.10252e-13	65	75.0998	72	47
THRIPS_11_08_2011_00507	Titin [Harpegnathos saltator]	218	gi|307204650|gb|EFN83272.1|Titin [Harpegnathos saltator]	EFN83272	3.01686e-06	60	55.0694	71	43
THRIPS_11_08_2011_00509	rrp1l_drome ame: full=ribosomal rna processing protein 1 homolog ame: full=nnp-1 homolog ame: full=rrp1-like protein	220	gi|14194975|sp|Q9VJZ7.1|RRP1L_DROMERecName: Full=Ribosomal RNA processing protein 1 homolog; AltName: Full=NNP-1 homolog; AltName: Full=RRP1-like protein	Q9VJZ7	2.01392e-07	60	54.299	71	43
THRIPS_11_08_2011_00512	cap cg18408- isoform c	271	gi|242010082|ref|XP_002425805.1|dcapl, putative [Pediculus humanus corporis] >gi|212509738|gb|EEB13067.1| dcapl, putative [Pediculus humanus corporis]	XP_002425805	5.38655e-11	59	70.8626	83	49
THRIPS_11_08_2011_00515	rna-binding protein nova-1	234	gi|270009705|gb|EFA06153.1|hypothetical protein TcasGA2_TC008998 [Tribolium castaneum]	EFA06153	1.80302e-14	82	82.4185	56	46
THRIPS_11_08_2011_00517	yn53_schpo ame: full= d-lactate dehydrogenase mitochondrial flags: precursor	236	gi|74638424|sp|Q9C1X2.1|YN53_SCHPORecName: Full=Putative D-lactate dehydrogenase C713.03, mitochondrial; Flags: Precursor	Q9C1X2	9.82766e-18	70	88.5817	84	59
THRIPS_11_08_2011_00521	yng2_canga ame: full=chromatin modification-related protein yng2 ame: full=ing1 homolog 2	400	gi|74637634|sp|Q6FSB1.1|YNG2_CANGARecName: Full=Chromatin modification-related protein YNG2; AltName: Full=ING1 homolog 2	Q6FSB1	5.34051e-16	72	82.8037	50	36
THRIPS_11_08_2011_00523	cq028_human ame: full=upf0663 transmembrane protein c17orf28 ame: full=down-regulated in multiple cancers 1	265	gi|68565199|sp|Q8IV36.1|CQ028_HUMANRecName: Full=UPF0663 transmembrane protein C17orf28; AltName: Full=Down-regulated in multiple cancers 1	Q8IV36	2.35762e-11	94	67.3958	38	36
THRIPS_11_08_2011_00525	shark_drome ame: full=tyrosine-protein kinase shark	1300	gi|33112443|sp|Q24145.2|SHARK_DROMERecName: Full=Tyrosine-protein kinase shark	Q24145	7.74017e-39	55	161.77	259	145
THRIPS_11_08_2011_00528	k0513_mouse ame: full=uncharacterized protein kiaa0513	1722	gi|52000726|sp|Q8R0A7.1|K0513_MOUSERecName: Full=Uncharacterized protein KIAA0513	Q8R0A7	5.65477e-27	66	122.865	124	82
THRIPS_11_08_2011_00536	tri33_mouse ame: full=e3 ubiquitin-protein ligase trim33 ame: full=ectodermin homolog ame: full=transcription intermediary factor 1-gamma short=tif1-gamma ame: full=tripartite motif-containing protein 33	360	gi|56404945|sp|Q99PP7.2|TRI33_MOUSERecName: Full=E3 ubiquitin-protein ligase TRIM33; AltName: Full=Ectodermin homolog; AltName: Full=Transcription intermediary factor 1-gamma; Short=TIF1-gamma; AltName: Full=Tripartite motif-containing protein 33	Q99PP7	9.53069e-18	59	88.5817	117	70
THRIPS_11_08_2011_00539	dopr1_drome ame: full=dopamine receptor 1 short=d-dop1 short= op1 short=dda1 flags: precursor	745	gi|55977796|sp|P41596.2|DOPR1_DROMERecName: Full=Dopamine receptor 1; Short=D-DOP1; Short=DmDop1; Short=dDA1; Flags: Precursor	P41596	3.45892e-84	88	250.751	148	131
THRIPS_11_08_2011_00541	cox16_mouse ame: full=cytochrome c oxidase assembly protein cox16 mitochondrial flags: precursor	245	gi|68565276|sp|Q9CR63.1|COX16_MOUSERecName: Full=Cytochrome c oxidase assembly protein COX16 homolog, mitochondrial; Flags: Precursor	Q9CR63	4.53309e-07	61	53.1434	71	44
THRIPS_11_08_2011_00543	agap001751- partial	243	gi|193681183|ref|XP_001946845.1|PREDICTED: similar to AGAP001751-PA, partial [Acyrthosiphon pisum]	XP_001946845	4.70725e-07	89	57.7658	37	33
THRIPS_11_08_2011_00544	mad_drome ame: full=protein mothers against dpp	246	gi|1170853|sp|P42003.1|MAD_DROMERecName: Full=Protein mothers against dpp	P42003	3.4468e-31	100	133.265	61	61
THRIPS_11_08_2011_00547	vp33a_rat ame: full=vacuolar protein sorting-associated protein 33a short=r-vps33a	238	gi|23396893|sp|Q63615.1|VP33A_RATRecName: Full=Vacuolar protein sorting-associated protein 33A; Short=r-vps33a	Q63615	8.58271e-14	70	75.485	72	51
THRIPS_11_08_2011_00553	titin_drome ame: full=titin ame: full=d-titin ame: full=kettin	5094	gi|172045934|sp|Q9I7U4.3|TITIN_DROMERecName: Full=Titin; AltName: Full=D-Titin; AltName: Full=Kettin	Q9I7U4	0	84	2506.86	1699	1430
THRIPS_11_08_2011_00556	hdac1_drome ame: full=histone deacetylase rpd3 short=hd short=drpd3	1706	gi|68068071|sp|Q94517.2|HDAC1_DROMERecName: Full=Histone deacetylase Rpd3; Short=HD; Short=dRPD3	Q94517	0	93	806.979	477	444
THRIPS_11_08_2011_00558	vitellogenin-a1	249	gi|70673205|gb|AAZ06771.1|vitellogenin [Homalodisca vitripennis]	AAZ06771	6.96949e-11	70	70.4774	71	50
THRIPS_11_08_2011_00566	mana_strli ame: full=mannan endo- -beta-mannosidase ame: full= -beta-d-mannan mannanohydrolase ame: full=beta-mannanase flags: precursor	3644	gi|8488989|sp|P51529.2|MANA_STRLIRecName: Full=Mannan endo-1,4-beta-mannosidase; AltName: Full=1,4-beta-D-mannan mannanohydrolase; AltName: Full=Beta-mannanase; Flags: Precursor	P51529	1.67321e-37	58	159.073	218	127
THRIPS_11_08_2011_00567	mana_strli ame: full=mannan endo- -beta-mannosidase ame: full= -beta-d-mannan mannanohydrolase ame: full=beta-mannanase flags: precursor	3595	gi|8488989|sp|P51529.2|MANA_STRLIRecName: Full=Mannan endo-1,4-beta-mannosidase; AltName: Full=1,4-beta-D-mannan mannanohydrolase; AltName: Full=Beta-mannanase; Flags: Precursor	P51529	1.00247e-26	56	123.25	165	94
THRIPS_11_08_2011_00568	mana_strli ame: full=mannan endo- -beta-mannosidase ame: full= -beta-d-mannan mannanohydrolase ame: full=beta-mannanase flags: precursor	2775	gi|8488989|sp|P51529.2|MANA_STRLIRecName: Full=Mannan endo-1,4-beta-mannosidase; AltName: Full=1,4-beta-D-mannan mannanohydrolase; AltName: Full=Beta-mannanase; Flags: Precursor	P51529	1.07842e-57	60	225.713	292	176
THRIPS_11_08_2011_00569	mana_strli ame: full=mannan endo- -beta-mannosidase ame: full= -beta-d-mannan mannanohydrolase ame: full=beta-mannanase flags: precursor	3145	gi|8488989|sp|P51529.2|MANA_STRLIRecName: Full=Mannan endo-1,4-beta-mannosidase; AltName: Full=1,4-beta-D-mannan mannanohydrolase; AltName: Full=Beta-mannanase; Flags: Precursor	P51529	1.23956e-57	60	225.713	292	176
THRIPS_11_08_2011_00571	rho gtpase activating protein 23	4869	gi|223587769|emb|CAR82258.1|hypothetical protein [Cotesia congregata]	CAR82258	1.32374e-105	58	390.193	525	308
THRIPS_11_08_2011_00572	gunk_fusox ame: full= endoglucanase type k ame: full=cellulase ame: full=endo- -beta-glucanase flags: precursor	1805	gi|1170140|sp|P45699.1|GUNK_FUSOXRecName: Full=Putative endoglucanase type K; AltName: Full=Cellulase; AltName: Full=Endo-1,4-beta-glucanase; Flags: Precursor	P45699	8.04218e-56	63	218.779	220	140
THRIPS_11_08_2011_00576	mabp1_mouse ame: full=mitogen-activated protein kinase-binding protein 1 ame: full=jnk-binding protein 1 short=jnkbp-1	5779	gi|81884908|sp|Q6NS57.1|MABP1_MOUSERecName: Full=Mitogen-activated protein kinase-binding protein 1; AltName: Full=JNK-binding protein 1; Short=JNKBP-1	Q6NS57	0	74	837.795	712	531
THRIPS_11_08_2011_00578	rrna promoter binding protein	939	gi|170571877|ref|XP_001891902.1|rRNA promoter binding protein [Brugia malayi] >gi|170572043|ref|XP_001891963.1| rRNA promoter binding protein [Brugia malayi] >gi|158603212|gb|EDP39227.1| rRNA promoter binding protein, putative [Brugia malayi] >gi|158603328|gb|EDP39287.1| rRNA promoter binding protein, putative [Brugia malayi]	XP_001891902	1.46987e-33	73	147.902	115	84
THRIPS_11_08_2011_00583	ubp36_drops ame: full=ubiquitin carboxyl-terminal hydrolase 36 ame: full=deubiquitinating enzyme 36 ame: full=protein scrawny ame: full=ubiquitin thiolesterase 36 ame: full=ubiquitin-specific-processing protease 36	4098	gi|251765181|sp|Q2LZB1.2|UBP36_DROPSRecName: Full=Ubiquitin carboxyl-terminal hydrolase 36; AltName: Full=Deubiquitinating enzyme 36; AltName: Full=Protein scrawny; AltName: Full=Ubiquitin thiolesterase 36; AltName: Full=Ubiquitin-specific-processing protease 36	Q2LZB1	2.10865e-19	52	74.3294	155	81
THRIPS_11_08_2011_00584	hmg2_drome ame: full=high mobility group protein dsp1 ame: full=protein dorsal switch 1	1936	gi|17366497|sp|Q24537.1|HMG2_DROMERecName: Full=High mobility group protein DSP1; AltName: Full=Protein dorsal switch 1	Q24537	6.63716e-80	64	298.901	294	189
THRIPS_11_08_2011_00585	hmg2_drome ame: full=high mobility group protein dsp1 ame: full=protein dorsal switch 1	2855	gi|17366497|sp|Q24537.1|HMG2_DROMERecName: Full=High mobility group protein DSP1; AltName: Full=Protein dorsal switch 1	Q24537	5.54607e-49	87	196.823	118	103
THRIPS_11_08_2011_00586	hmg2_drome ame: full=high mobility group protein dsp1 ame: full=protein dorsal switch 1	2027	gi|17366497|sp|Q24537.1|HMG2_DROMERecName: Full=High mobility group protein DSP1; AltName: Full=Protein dorsal switch 1	Q24537	8.03032e-76	62	285.419	295	185
THRIPS_11_08_2011_00587	hmg2_drome ame: full=high mobility group protein dsp1 ame: full=protein dorsal switch 1	2028	gi|17366497|sp|Q24537.1|HMG2_DROMERecName: Full=High mobility group protein DSP1; AltName: Full=Protein dorsal switch 1	Q24537	5.56118e-77	90	289.271	165	149
THRIPS_11_08_2011_00588	fur2_drome ame: full=furin-like protease 2 short=furin-2 flags: precursor	6745	gi|25453439|sp|P30432.2|FUR2_DROMERecName: Full=Furin-like protease 2; Short=Furin-2; Flags: Precursor	P30432	0	84	936.406	626	527
THRIPS_11_08_2011_00589	fur2_drome ame: full=furin-like protease 2 short=furin-2 flags: precursor	6581	gi|25453439|sp|P30432.2|FUR2_DROMERecName: Full=Furin-like protease 2; Short=Furin-2; Flags: Precursor	P30432	0	84	936.406	626	527
THRIPS_11_08_2011_00590	mtssl_mouse ame: full=mtss1-like protein	1578	gi|81885444|sp|Q6P9S0.1|MTSSL_MOUSERecName: Full=MTSS1-like protein	Q6P9S0	1.09757e-29	54	131.724	185	100
THRIPS_11_08_2011_00591	mtssl_mouse ame: full=mtss1-like protein	2273	gi|81885444|sp|Q6P9S0.1|MTSSL_MOUSERecName: Full=MTSS1-like protein	Q6P9S0	2.1046e-88	66	327.405	336	225
THRIPS_11_08_2011_00592	mtss1_human ame: full=metastasis suppressor protein 1 ame: full=metastasis suppressor ygl-1 ame: full=missing in metastasis protein	651	gi|30923156|sp|O43312.2|MTSS1_HUMANRecName: Full=Metastasis suppressor protein 1; AltName: Full=Metastasis suppressor YGL-1; AltName: Full=Missing in metastasis protein	O43312	1.15089e-18	75	93.2041	70	53
THRIPS_11_08_2011_00594	if4g3_human ame: full=eukaryotic translation initiation factor 4 gamma 3 short=eif-4-gamma 3 short=eif-4g 3 short=eif4g 3 ame: full=eif-4-gamma ii short=eif4gii	4859	gi|48428276|sp|O43432.2|IF4G3_HUMANRecName: Full=Eukaryotic translation initiation factor 4 gamma 3; Short=eIF-4-gamma 3; Short=eIF-4G 3; Short=eIF4G 3; AltName: Full=eIF-4-gamma II; Short=eIF4GII	O43432	5.82311e-134	51	479.945	1008	520
THRIPS_11_08_2011_00595	slmo_drome ame: full=protein slowmo	2626	gi|62901058|sp|Q9V3U9.1|SLMO_DROMERecName: Full=Protein slowmo	Q9V3U9	1.32606e-65	76	251.906	197	150
THRIPS_11_08_2011_00599	zinc finger partial	4942	gi|115677149|ref|XP_001202730.1|PREDICTED: similar to zinc finger protein, partial [Strongylocentrotus purpuratus] >gi|115712422|ref|XP_793556.2| PREDICTED: similar to zinc finger protein, partial [Strongylocentrotus purpuratus]	XP_001202730	3.86496e-36	47	159.458	434	204
THRIPS_11_08_2011_00600	kdm5_drome ame: full=lysine-specific demethylase lid ame: full=histone demethylase lid ame: full=jumonji arid domain-containing protein lid ame: full=protein little imaginal disks ame: full=retinoblastoma-binding protein 2 homolog	242	gi|74869933|sp|Q9VMJ7.1|KDM5_DROMERecName: Full=Lysine-specific demethylase lid; AltName: Full=Histone demethylase lid; AltName: Full=Jumonji/ARID domain-containing protein lid; AltName: Full=Protein little imaginal disks; AltName: Full=Retinoblastoma-binding protein 2 homolog	Q9VMJ7	7.75652e-07	59	52.373	71	42
THRIPS_11_08_2011_00601	if4b_human ame: full=eukaryotic translation initiation factor 4b short=eif-4b	3480	gi|205371761|sp|P23588.2|IF4B_HUMANRecName: Full=Eukaryotic translation initiation factor 4B; Short=eIF-4B	P23588	5.67596e-19	56	97.4413	159	90
THRIPS_11_08_2011_00602	if4b_human ame: full=eukaryotic translation initiation factor 4b short=eif-4b	3390	gi|205371761|sp|P23588.2|IF4B_HUMANRecName: Full=Eukaryotic translation initiation factor 4B; Short=eIF-4B	P23588	5.53901e-19	56	97.4413	159	90
THRIPS_11_08_2011_00605	ago2_mouse ame: full=protein argonaute-2 short=argonaute2 short=mago2 ame: full=eukaryotic translation initiation factor 2c 2 short=eif-2c 2 short=eif2c 2 ame: full=piwi argonaute family protein meif2c2 ame: full=protein slicer	4025	gi|93141280|sp|Q8CJG0.2|AGO2_MOUSERecName: Full=Protein argonaute-2; Short=Argonaute2; Short=mAgo2; AltName: Full=Eukaryotic translation initiation factor 2C 2; Short=eIF-2C 2; Short=eIF2C 2; AltName: Full=Piwi/argonaute family protein meIF2C2; AltName: Full=Protein slicer	Q8CJG0	5.96519e-161	85	569.311	354	304
THRIPS_11_08_2011_00606	ago2_human ame: full=protein argonaute-2 short=argonaute2 short=hago2 ame: full=eukaryotic translation initiation factor 2c 2 short=eif-2c 2 short=eif2c 2 ame: full=paz piwi domain protein short=ppd ame: full=protein slicer	6069	gi|229463006|sp|Q9UKV8.3|AGO2_HUMANRecName: Full=Protein argonaute-2; Short=Argonaute2; Short=hAgo2; AltName: Full=Eukaryotic translation initiation factor 2C 2; Short=eIF-2C 2; Short=eIF2C 2; AltName: Full=PAZ Piwi domain protein; Short=PPD; AltName: Full=Protein slicer	Q9UKV8	0	83	1302.73	859	720
THRIPS_11_08_2011_00607	rla0_drome ame: full=60s acidic ribosomal protein p0 ame: full=apurinic-apyrimidinic endonuclease ame: full=dna-(apurinic or apyrimidinic site) lyase	1846	gi|113987|sp|P19889.1|RLA0_DROMERecName: Full=60S acidic ribosomal protein P0; AltName: Full=Apurinic-apyrimidinic endonuclease; AltName: Full=DNA-(apurinic or apyrimidinic site) lyase	P19889	4.72364e-128	90	458.759	275	248
THRIPS_11_08_2011_00608	rla0_drome ame: full=60s acidic ribosomal protein p0 ame: full=apurinic-apyrimidinic endonuclease ame: full=dna-(apurinic or apyrimidinic site) lyase	2901	gi|113987|sp|P19889.1|RLA0_DROMERecName: Full=60S acidic ribosomal protein P0; AltName: Full=Apurinic-apyrimidinic endonuclease; AltName: Full=DNA-(apurinic or apyrimidinic site) lyase	P19889	1.68264e-85	91	318.161	192	175
THRIPS_11_08_2011_00609	pabpa_xenla ame: full=polyadenylate-binding protein 1-a short=pabp-1-a short=poly -binding protein 1-a short=xpabp1-a ame: full=cytoplasmic poly -binding protein 1-a	2279	gi|94730404|sp|P20965.3|PABPA_XENLARecName: Full=Polyadenylate-binding protein 1-A; Short=PABP-1-A; Short=Poly(A)-binding protein 1-A; Short=xPABP1-A; AltName: Full=Cytoplasmic poly(A)-binding protein 1-A	P20965	7.17261e-129	70	461.84	469	332
THRIPS_11_08_2011_00610	rl19_drome ame: full=60s ribosomal protein l19	1046	gi|31340522|sp|P36241.2|RL19_DROMERecName: Full=60S ribosomal protein L19	P36241	1.09571e-70	94	169.474	92	87
THRIPS_11_08_2011_00611	rl19_drome ame: full=60s ribosomal protein l19	973	gi|31340522|sp|P36241.2|RL19_DROMERecName: Full=60S ribosomal protein L19	P36241	1.5233e-75	90	283.108	190	171
THRIPS_11_08_2011_00612	GG11743 [Drosophila erecta]	2451	gi|194905528|ref|XP_001981216.1|GG11743 [Drosophila erecta] >gi|190655854|gb|EDV53086.1| GG11743 [Drosophila erecta]	XP_001981216	1.46785e-06	48	60.077	102	49
THRIPS_11_08_2011_00613	zn287_mouse ame: full=zinc finger protein 287 short=zfp-287 ame: full=zinc finger protein skat-2	561	gi|20141034|sp|Q9EQB9.1|ZN287_MOUSERecName: Full=Zinc finger protein 287; Short=Zfp-287; AltName: Full=Zinc finger protein SKAT-2	Q9EQB9	3.1122e-21	67	101.293	79	53
THRIPS_11_08_2011_00616	gagj_drome ame: full=nucleic-acid-binding protein from mobile element jockey ame: full=orf1	2059	gi|120799|sp|P21330.1|GAGJ_DROMERecName: Full=Nucleic-acid-binding protein from mobile element jockey; AltName: Full=ORF1	P21330	3.62765e-07	56	57.3806	65	37
THRIPS_11_08_2011_00619	dihydrolipoyllysine-residue acetyltransferase component of pyruvate dehydrogenase mitochondrial	1748	gi|242011731|ref|XP_002426600.1|conserved hypothetical protein [Pediculus humanus corporis] >gi|212510749|gb|EEB13862.1| conserved hypothetical protein [Pediculus humanus corporis]	XP_002426600	1.14035e-39	61	169.474	278	172
THRIPS_11_08_2011_00620	isoform d	1053	gi|242011731|ref|XP_002426600.1|conserved hypothetical protein [Pediculus humanus corporis] >gi|212510749|gb|EEB13862.1| conserved hypothetical protein [Pediculus humanus corporis]	XP_002426600	7.26385e-25	79	83.1889	64	51
THRIPS_11_08_2011_00621	cell wall surface anchor family protein	1922	gi|182413507|ref|YP_001818573.1|cell wall surface anchor family protein [Opitutus terrae PB90-1] >gi|177840721|gb|ACB74973.1| cell wall surface anchor family protein [Opitutus terrae PB90-1]	YP_001818573	5.43737e-06	36	57.7658	257	93
THRIPS_11_08_2011_00624	lola6_drome ame: full=longitudinals lacking isoforms n o w x y	2219	gi|73920874|sp|Q9V5M3.3|LOLA6_DROMERecName: Full=Longitudinals lacking protein, isoforms N/O/W/X/Y	Q9V5M3	3.20624e-33	55	144.05	242	135
THRIPS_11_08_2011_00625	lola6_drome ame: full=longitudinals lacking isoforms n o w x y	3802	gi|73920874|sp|Q9V5M3.3|LOLA6_DROMERecName: Full=Longitudinals lacking protein, isoforms N/O/W/X/Y	Q9V5M3	4.94545e-32	56	140.969	243	138
THRIPS_11_08_2011_00629	fat2_drome ame: full=fat-like cadherin-related tumor suppressor homolog ame: full=protein kugelei flags: precursor	1570	gi|25090328|sp|Q9VW71.2|FAT2_DROMERecName: Full=Fat-like cadherin-related tumor suppressor homolog; AltName: Full=Protein kugelei; Flags: Precursor	Q9VW71	1.13992e-103	65	377.481	403	262
THRIPS_11_08_2011_00630	zinc h2c2 domain containing	4098	gi|221118601|ref|XP_002157761.1|PREDICTED: hypothetical protein, partial [Hydra magnipapillata]	XP_002157761	1.923e-17	46	97.0561	251	117
THRIPS_11_08_2011_00633	rl37_spofr ame: full=60s ribosomal protein l37	370	gi|20139580|sp|Q962S7.3|RL37_SPOFRRecName: Full=60S ribosomal protein L37	Q962S7	1.26867e-33	97	141.354	70	68
THRIPS_11_08_2011_00635	rtf1_drome ame: full=rna polymerase-associated protein rtf1 short=drtf1	506	gi|74872306|sp|Q9W261.1|RTF1_DROMERecName: Full=RNA polymerase-associated protein Rtf1; Short=dRtf1	Q9W261	2.40361e-08	75	58.151	66	50
THRIPS_11_08_2011_00637	tpd54_human ame: full=tumor protein d54 short=hd54 ame: full=tumor protein d52-like 2	1629	gi|20141658|sp|O43399.2|TPD54_HUMANRecName: Full=Tumor protein D54; Short=hD54; AltName: Full=Tumor protein D52-like 2	O43399	1.26437e-20	60	101.679	146	89
THRIPS_11_08_2011_00638	pai2b_human ame: full=polyadenylate-binding protein-interacting protein 2b short=pabp-interacting protein 2b short=paip-2b short=poly -binding protein-interacting protein 2b	4149	gi|166977703|sp|Q9ULR5.2|PAI2B_HUMANRecName: Full=Polyadenylate-binding protein-interacting protein 2B; Short=PABP-interacting protein 2B; Short=PAIP-2B; Short=Poly(A)-binding protein-interacting protein 2B	Q9ULR5	6.44481e-09	57	64.3142	115	66
THRIPS_11_08_2011_00640	cg11791- isoform a	2452	gi|110759279|ref|XP_001119930.1|PREDICTED: similar to CG11791-PA, isoform A [Apis mellifera]	XP_001119930	6.15273e-13	67	81.2629	83	56
THRIPS_11_08_2011_00641	go45_human ame: full=golgin-45 ame: full=basic leucine zipper nuclear factor 1 ame: full=jem-1 ame: full=p45 basic leucine-zipper nuclear factor	1883	gi|116242501|sp|Q9H2G9.2|GO45_HUMANRecName: Full=Golgin-45; AltName: Full=Basic leucine zipper nuclear factor 1; AltName: Full=JEM-1; AltName: Full=p45 basic leucine-zipper nuclear factor	Q9H2G9	9.1095e-18	48	92.4337	241	116
THRIPS_11_08_2011_00642	pacn2_mouse ame: full=protein kinase c and casein kinase substrate in neurons protein 2	5408	gi|22256969|sp|Q9WVE8.1|PACN2_MOUSERecName: Full=Protein kinase C and casein kinase substrate in neurons protein 2	Q9WVE8	1.41075e-112	62	409.068	507	315
THRIPS_11_08_2011_00643	oxr1_rat ame: full=oxidation resistance protein 1 ame: full=protein c7	9891	gi|294862499|sp|Q4V8B0.3|OXR1_RATRecName: Full=Oxidation resistance protein 1; AltName: Full=Protein C7	Q4V8B0	1.42412e-33	47	147.517	407	193
THRIPS_11_08_2011_00644	cah8_mouse ame: full=carbonic anhydrase-related protein short=carp ame: full=carbonic anhydrase viii short=ca-viii	1258	gi|30581041|sp|P28651.5|CAH8_MOUSERecName: Full=Carbonic anhydrase-related protein; Short=CARP; AltName: Full=Carbonic anhydrase VIII; Short=CA-VIII	P28651	4.36567e-15	68	82.8037	73	50
THRIPS_11_08_2011_00646	hypothetical protein [Vitis vinifera]	592	gi|147826550|emb|CAN70790.1|hypothetical protein [Vitis vinifera]	CAN70790	5.01024e-22	83	108.227	74	62
THRIPS_11_08_2011_00647	npc1_human ame: full=niemann-pick c1 protein flags: precursor	6404	gi|83305902|sp|O15118.2|NPC1_HUMANRecName: Full=Niemann-Pick C1 protein; Flags: Precursor	O15118	0	56	618.616	974	552
THRIPS_11_08_2011_00648	npc1_pig ame: full=niemann-pick c1 protein flags: precursor	5572	gi|8134591|sp|P56941.1|NPC1_PIGRecName: Full=Niemann-Pick C1 protein; Flags: Precursor	P56941	0	64	830.091	975	631
THRIPS_11_08_2011_00649	rb11a_rat ame: full=ras-related protein rab-11a short=rab-11 ame: full=24kg	4031	gi|50402540|sp|P62494.3|RB11A_RATRecName: Full=Ras-related protein Rab-11A; Short=Rab-11; AltName: Full=24KG >gi|50402541|sp|P62490.3|RB11A_CANFA RecName: Full=Ras-related protein Rab-11A; Short=Rab-11 >gi|50402542|sp|P62491.3|RB11A_HUMAN RecName: Full=Ras-related protein Rab-11A; Short=Rab-11; AltName: Full=YL8 >gi|50402543|sp|P62492.3|RB11A_MOUSE RecName: Full=Ras-related protein Rab-11A; Short…	P62494	1.22647e-97	89	358.992	215	192
THRIPS_11_08_2011_00651	c2c2l_mouse ame: full=c2 domain-containing protein 2-like ame: full=transmembrane protein 24	4344	gi|46577418|sp|Q80X80.2|C2C2L_MOUSERecName: Full=C2 domain-containing protein 2-like; AltName: Full=Transmembrane protein 24	Q80X80	3.97732e-09	36	65.0846	461	169
THRIPS_11_08_2011_00658	acox1_drome ame: full=probable peroxisomal acyl-coenzyme a oxidase 1	2707	gi|122102849|sp|Q7KML2.1|ACOX1_DROMERecName: Full=Probable peroxisomal acyl-coenzyme A oxidase 1	Q7KML2	0	72	727.243	666	484
THRIPS_11_08_2011_00659	opa1_chick ame: full=dynamin-like 120 kda mitochondrial ame: full=optic atrophy protein 1 homolog flags: precursor	573	gi|82194911|sp|Q5F499.1|OPA1_CHICKRecName: Full=Dynamin-like 120 kDa protein, mitochondrial; AltName: Full=Optic atrophy protein 1 homolog; Flags: Precursor	Q5F499	5.425e-08	87	57.3806	40	35
THRIPS_11_08_2011_00660	nu301_drome ame: full=nucleosome-remodeling factor subunit nurf301 ame: full=enhancer of bithorax ame: full=nucleosome-remodeling factor 215 kda subunit short=nurf-215	2772	gi|74872079|sp|Q9W0T1.2|NU301_DROMERecName: Full=Nucleosome-remodeling factor subunit NURF301; AltName: Full=Enhancer of bithorax; AltName: Full=Nucleosome-remodeling factor 215 kDa subunit; Short=NURF-215	Q9W0T1	2.69486e-117	77	423.705	341	264
THRIPS_11_08_2011_00661	herc1_human ame: full=probable e3 ubiquitin-protein ligase herc1 ame: full=hect domain and rcc1-like domain-containing protein 1 ame: full=p532 ame: full=p619	390	gi|296434522|sp|Q15751.2|HERC1_HUMANRecName: Full=Probable E3 ubiquitin-protein ligase HERC1; AltName: Full=HECT domain and RCC1-like domain-containing protein 1; AltName: Full=p532; AltName: Full=p619	Q15751	2.74677e-57	88	219.935	129	114
THRIPS_11_08_2011_00662	herc1_human ame: full=probable e3 ubiquitin-protein ligase herc1 ame: full=hect domain and rcc1-like domain-containing protein 1 ame: full=p532 ame: full=p619	330	gi|296434522|sp|Q15751.2|HERC1_HUMANRecName: Full=Probable E3 ubiquitin-protein ligase HERC1; AltName: Full=HECT domain and RCC1-like domain-containing protein 1; AltName: Full=p532; AltName: Full=p619	Q15751	7.50423e-47	87	185.267	109	95
THRIPS_11_08_2011_00663	ggt1_rat ame: full=gamma-glutamyltranspeptidase 1 short=ggt 1 ame: full=gamma-glutamyltransferase 1 ame: cd_antigen=cd224 contains: ame: full=gamma-glutamyltranspeptidase 1 heavy chain contains: ame: full=gamma-glutamyltranspeptidase 1 light chain flags: precursor	3540	gi|146345424|sp|P07314.4|GGT1_RATRecName: Full=Gamma-glutamyltranspeptidase 1; Short=GGT 1; AltName: Full=Gamma-glutamyltransferase 1; AltName: CD_antigen=CD224; Contains: RecName: Full=Gamma-glutamyltranspeptidase 1 heavy chain; Contains: RecName: Full=Gamma-glutamyltranspeptidase 1 light chain; Flags: Precursor	P07314	1.13757e-107	60	392.119	527	321
THRIPS_11_08_2011_00664	kgp24_drome ame: full=cgmp-dependent protein isozyme 2 forms cd4 t1 t3a t3b short=cgk ame: full=foraging protein	3570	gi|59799777|sp|Q03043.3|KGP24_DROMERecName: Full=cGMP-dependent protein kinase, isozyme 2 forms cD4/T1/T3A/T3B; Short=cGK; AltName: Full=Foraging protein	Q03043	0	89	978.008	609	546
THRIPS_11_08_2011_00665	mib1_human ame: full=e3 ubiquitin-protein ligase mib1 ame: full=dapk-interacting protein 1 short=dip-1 ame: full=mind bomb homolog 1 ame: full=zinc finger zz type with ankyrin repeat domain protein 2	499	gi|68565512|sp|Q86YT6.1|MIB1_HUMANRecName: Full=E3 ubiquitin-protein ligase MIB1; AltName: Full=DAPK-interacting protein 1; Short=DIP-1; AltName: Full=Mind bomb homolog 1; AltName: Full=Zinc finger ZZ type with ankyrin repeat domain protein 2	Q86YT6	4.55325e-53	77	171.785	115	89
THRIPS_11_08_2011_00668	low quality protein: protein	236	gi|78033430|emb|CAJ30045.1|conserved hypothetical protein [Magnetospirillum gryphiswaldense]	CAJ30045	6.72195e-22	79	94.7449	62	49
THRIPS_11_08_2011_00669	gmppb_drops ame: full=mannose-1-phosphate guanyltransferase beta ame: full=gdp-mannose pyrophosphorylase b ame: full=gtp-mannose-1-phosphate guanylyltransferase beta	3161	gi|121990043|sp|Q295Y7.1|GMPPB_DROPSRecName: Full=Mannose-1-phosphate guanyltransferase beta; AltName: Full=GDP-mannose pyrophosphorylase B; AltName: Full=GTP-mannose-1-phosphate guanylyltransferase beta	Q295Y7	6.41212e-163	89	575.474	371	332
THRIPS_11_08_2011_00670	vit2_peram ame: full=vitellogenin-2 short=vg-2 flags: precursor	772	gi|48428677|sp|Q9BPS0.1|VIT2_PERAMRecName: Full=Vitellogenin-2; Short=Vg-2; Flags: Precursor	Q9BPS0	2.75255e-39	59	162.155	246	146
THRIPS_11_08_2011_00671	isoform g	361	gi|158301823|ref|XP_321463.4|AGAP001633-PA [Anopheles gambiae str. PEST] >gi|157012658|gb|EAA00967.4| AGAP001633-PA [Anopheles gambiae str. PEST]	XP_321463	1.13721e-45	83	130.183	80	67
THRIPS_11_08_2011_00672	syg_bommo ame: full=glycyl-trna synthetase ame: full=diadenosine tetraphosphate synthetase short=ap-4-a synthetase ame: full=glycine--trna ligase short=	3262	gi|1351153|sp|Q04451.2|SYG_BOMMORecName: Full=Glycyl-tRNA synthetase; AltName: Full=Diadenosine tetraphosphate synthetase; Short=AP-4-A synthetase; AltName: Full=Glycine--tRNA ligase; Short=GlyRS	Q04451	0	83	981.86	670	562
THRIPS_11_08_2011_00673	npc1_human ame: full=niemann-pick c1 protein flags: precursor	6334	gi|83305902|sp|O15118.2|NPC1_HUMANRecName: Full=Niemann-Pick C1 protein; Flags: Precursor	O15118	0	59	941.028	1315	782
THRIPS_11_08_2011_00674	hm13_mouse ame: full=minor histocompatibility antigen h13 ame: full=presenilin-like protein 3 ame: full=signal peptide peptidase	2096	gi|25008565|sp|Q9D8V0.1|HM13_MOUSERecName: Full=Minor histocompatibility antigen H13; AltName: Full=Presenilin-like protein 3; AltName: Full=Signal peptide peptidase	Q9D8V0	1.10593e-128	77	461.07	360	279
THRIPS_11_08_2011_00676	rtjk_drome ame: full=rna-directed dna polymerase from mobile element jockey ame: full=reverse transcriptase	443	gi|134083|sp|P21328.1|RTJK_DROMERecName: Full=RNA-directed DNA polymerase from mobile element jockey; AltName: Full=Reverse transcriptase	P21328	6.05249e-06	55	49.6766	69	38
THRIPS_11_08_2011_00677	ell_human ame: full=rna polymerase ii elongation factor ell ame: full=eleven-nineteen lysine-rich leukemia protein	8372	gi|1706635|sp|P55199.1|ELL_HUMANRecName: Full=RNA polymerase II elongation factor ELL; AltName: Full=Eleven-nineteen lysine-rich leukemia protein	P55199	7.54429e-28	48	128.257	321	157
THRIPS_11_08_2011_00678	arp3_drome ame: full=actin-related protein 3 ame: full=actin-2 ame: full=actin-like protein 3 ame: full=actin-like protein 66b	253	gi|30581042|sp|P32392.3|ARP3_DROMERecName: Full=Actin-related protein 3; AltName: Full=Actin-2; AltName: Full=Actin-like protein 3; AltName: Full=Actin-like protein 66B	P32392	4.34293e-18	88	89.7373	53	47
THRIPS_11_08_2011_00679	titin_drome ame: full=titin ame: full=d-titin ame: full=kettin	226	gi|172045934|sp|Q9I7U4.3|TITIN_DROMERecName: Full=Titin; AltName: Full=D-Titin; AltName: Full=Kettin	Q9I7U4	2.0016e-07	72	54.299	50	36
THRIPS_11_08_2011_00681	cysteine protease	396	gi|193652476|ref|XP_001947296.1|PREDICTED: similar to AGAP008497-PA [Acyrthosiphon pisum]	XP_001947296	1.75614e-09	79	65.855	49	39
THRIPS_11_08_2011_00684	sc31a_human ame: full=protein transport protein sec31a ame: full=abp125 ame: full=abp130 ame: full=sec31-like protein 1 ame: full=sec31-related protein a ame: full=web1-like protein	4814	gi|152112287|sp|O94979.3|SC31A_HUMANRecName: Full=Protein transport protein Sec31A; AltName: Full=ABP125; AltName: Full=ABP130; AltName: Full=SEC31-like protein 1; AltName: Full=SEC31-related protein A; AltName: Full=Web1-like protein	O94979	0	64	605.134	739	473
THRIPS_11_08_2011_00685	ubp34_human ame: full=ubiquitin carboxyl-terminal hydrolase 34 ame: full=deubiquitinating enzyme 34 ame: full=ubiquitin thiolesterase 34 ame: full=ubiquitin-specific-processing protease 34	206	gi|212276488|sp|Q70CQ2.2|UBP34_HUMANRecName: Full=Ubiquitin carboxyl-terminal hydrolase 34; AltName: Full=Deubiquitinating enzyme 34; AltName: Full=Ubiquitin thiolesterase 34; AltName: Full=Ubiquitin-specific-processing protease 34	Q70CQ2	8.25728e-17	74	85.5001	66	49
THRIPS_11_08_2011_00686	hsp90 atpase activator	206	gi|19074553|ref|NP_586059.1|hypothetical protein ECU07_1300 [Encephalitozoon cuniculi GB-M1] >gi|19069195|emb|CAD25663.1| hypothetical protein [Encephalitozoon cuniculi GB-M1]	NP_586059	4.8586e-20	83	100.908	66	55
THRIPS_11_08_2011_00689	hecd1_mouse ame: full=e3 ubiquitin-protein ligase hectd1 ame: full=hect domain-containing protein 1 ame: full=protein open mind	471	gi|302425231|sp|Q69ZR2.2|HECD1_MOUSERecName: Full=E3 ubiquitin-protein ligase HECTD1; AltName: Full=HECT domain-containing protein 1; AltName: Full=Protein open mind	Q69ZR2	2.98365e-28	88	124.02	72	64
THRIPS_11_08_2011_00694	stx1a_drome ame: full=syntaxin-1a ame: full=dsynt1	972	gi|2501095|sp|Q24547.1|STX1A_DROMERecName: Full=Syntaxin-1A; AltName: Full=dSynt1	Q24547	3.57941e-106	88	232.261	151	133
THRIPS_11_08_2011_00698	ygd6_schpo ame: full=zinc-type alcohol dehydrogenase-like protein	2203	gi|74582933|sp|O94564.1|YGD6_SCHPORecName: Full=Zinc-type alcohol dehydrogenase-like protein C1773.06c	O94564	2.61971e-11	44	71.2478	302	133
THRIPS_11_08_2011_00699	zn583_human ame: full=zinc finger protein 583 ame: full=zinc finger protein l3-5	325	gi|116242861|sp|Q96ND8.2|ZN583_HUMANRecName: Full=Zinc finger protein 583; AltName: Full=Zinc finger protein L3-5	Q96ND8	1.06113e-28	71	97.8265	77	55
THRIPS_11_08_2011_00700	guanyl-nucleotide exchange factor	485	gi|157111672|ref|XP_001651676.1|guanyl-nucleotide exchange factor [Aedes aegypti] >gi|108883850|gb|EAT48075.1| guanyl-nucleotide exchange factor [Aedes aegypti]	XP_001651676	1.87717e-11	95	72.4034	41	39
THRIPS_11_08_2011_00703	atrn1_human ame: full=attractin-like protein 1 flags: precursor	440	gi|189081675|sp|Q5VV63.2|ATRN1_HUMANRecName: Full=Attractin-like protein 1; Flags: Precursor	Q5VV63	1.00548e-13	43	75.485	120	52
THRIPS_11_08_2011_00704	cbr1_pig ame: full=carbonyl reductase ame: full=20-beta-hydroxysteroid dehydrogenase ame: full=nadph-dependent carbonyl reductase 1 ame: full=prostaglandin 9-ketoreductase ame: full=prostaglandin-e 9-reductase	356	gi|54035740|sp|Q28960.3|CBR1_PIGRecName: Full=Carbonyl reductase [NADPH] 1; AltName: Full=15-hydroxyprostaglandin dehydrogenase [NADP+]; AltName: Full=20-beta-hydroxysteroid dehydrogenase; AltName: Full=NADPH-dependent carbonyl reductase 1; AltName: Full=Prostaglandin 9-ketoreductase; AltName: Full=Prostaglandin-E(2) 9-reductase	Q28960	9.29647e-13	60	72.0182	94	57
THRIPS_11_08_2011_00705	rs30_bovin ame: full=40s ribosomal protein s30	1061	gi|51316582|sp|P62866.1|RS30_BOVINRecName: Full=40S ribosomal protein S30 >gi|51316583|sp|P62867.1|RS30_MUSSI RecName: Full=40S ribosomal protein S30 >gi|51338624|sp|P62863.1|RS30_PIG RecName: Full=40S ribosomal protein S30 >gi|51338625|sp|P62864.1|RS30_RAT RecName: Full=40S ribosomal protein S30 >gi|51338654|sp|P62860.1|RS30_CRIGR RecName: Full=40S ribosomal protein S30 >gi|51338655|sp|P62861.1|…	P62866	4.52097e-15	93	82.4185	59	55
THRIPS_11_08_2011_00707	asph_human ame: full=aspartyl asparaginyl beta-hydroxylase ame: full=aspartate beta-hydroxylase short=asp beta-hydroxylase ame: full=peptide-aspartate beta-dioxygenase	837	gi|145559444|sp|Q12797.3|ASPH_HUMANRecName: Full=Aspartyl/asparaginyl beta-hydroxylase; AltName: Full=Aspartate beta-hydroxylase; Short=ASP beta-hydroxylase; AltName: Full=Peptide-aspartate beta-dioxygenase	Q12797	1.15833e-09	48	63.929	127	61
THRIPS_11_08_2011_00709	sin3a_human ame: full=paired amphipathic helix protein sin3a ame: full=histone deacetylase complex subunit sin3a ame: full=transcriptional corepressor sin3a	3821	gi|37999759|sp|Q96ST3.2|SIN3A_HUMANRecName: Full=Paired amphipathic helix protein Sin3a; AltName: Full=Histone deacetylase complex subunit Sin3a; AltName: Full=Transcriptional corepressor Sin3a	Q96ST3	0	63	787.719	906	575
THRIPS_11_08_2011_00710	gbge_calvi ame: full=guanine nucleotide-binding protein subunit gamma-e flags: precursor	246	gi|14423721|sp|Q9NFZ2.1|GBGE_CALVIRecName: Full=Guanine nucleotide-binding protein subunit gamma-e; Flags: Precursor	Q9NFZ2	1.95721e-26	93	117.472	62	58
THRIPS_11_08_2011_00716	tbc1 domain family member 22b	274	gi|91092770|ref|XP_973712.1|PREDICTED: similar to AGAP004522-PA [Tribolium castaneum] >gi|270014893|gb|EFA11341.1| hypothetical protein TcasGA2_TC010881 [Tribolium castaneum]	XP_973712	1.90461e-16	70	88.9669	94	66
THRIPS_11_08_2011_00718	macoi_pantr ame: full=macoilin ame: full=transmembrane protein 57	323	gi|88911363|sp|Q2TLZ5.1|MACOI_PANTRRecName: Full=Macoilin; AltName: Full=Transmembrane protein 57	Q2TLZ5	1.64549e-09	64	61.2326	107	69
THRIPS_11_08_2011_00719	cf162_xentr ame: full=upf0708 protein c6orf162 homolog	319	gi|123893065|sp|Q28GF4.1|CF162_XENTRRecName: Full=UPF0708 protein C6orf162 homolog	Q28GF4	4.80387e-09	54	59.6918	82	45
THRIPS_11_08_2011_00720	amp1d_mouse ame: full=methionine aminopeptidase mitochondrial flags: precursor	236	gi|81880350|sp|Q9CPW9.1|AMP1D_MOUSERecName: Full=Methionine aminopeptidase 1D, mitochondrial; Flags: Precursor	Q9CPW9	1.62367e-12	67	71.2478	76	51
THRIPS_11_08_2011_00723	vit1_aedae ame: full=vitellogenin-a1 short=vg ame: full=pvg1 contains: ame: full=vitellin light chain short=vl contains: ame: full=vitellin heavy chain short=vh flags: precursor	550	gi|205831146|sp|Q16927.2|VIT1_AEDAERecName: Full=Vitellogenin-A1; Short=VG; AltName: Full=PVG1; Contains: RecName: Full=Vitellin light chain; Short=VL; Contains: RecName: Full=Vitellin heavy chain; Short=VH; Flags: Precursor	Q16927	1.15325e-28	56	125.946	163	92
THRIPS_11_08_2011_00725	ubtd1_danre ame: full=ubiquitin domain-containing protein 1	1641	gi|82226005|sp|Q4V8W7.1|UBTD1_DANRERecName: Full=Ubiquitin domain-containing protein 1	Q4V8W7	1.25367e-60	69	234.572	230	159
THRIPS_11_08_2011_00729	spt4h_drome ame: full=transcription elongation factor spt4 ame: full=drb sensitivity-inducing factor small subunit short=dsif small subunit ame: full=dspt4	309	gi|74866859|sp|Q9TVQ5.1|SPT4H_DROMERecName: Full=Transcription elongation factor SPT4; AltName: Full=DRB sensitivity-inducing factor small subunit; Short=DSIF small subunit; AltName: Full=dSpt4	Q9TVQ5	2.18044e-17	88	87.4261	51	45
THRIPS_11_08_2011_00733	isoform c	1587	gi|66546392|ref|XP_392295.2|PREDICTED: similar to bifocal CG1822-PB, isoform B [Apis mellifera]	XP_392295	4.70274e-29	42	134.035	418	179
THRIPS_11_08_2011_00735	pla1a_rat ame: full=phospholipase a1 member a ame: full=phosphatidylserine-specific phospholipase a1 short=ps-pla1 flags: precursor	4029	gi|81908528|sp|P97535.1|PLA1A_RATRecName: Full=Phospholipase A1 member A; AltName: Full=Phosphatidylserine-specific phospholipase A1; Short=PS-PLA1; Flags: Precursor	P97535	4.3007e-26	49	121.324	247	122
THRIPS_11_08_2011_00737	zn418_human ame: full=zinc finger protein 418	1454	gi|23396985|sp|Q8TF45.2|ZN418_HUMANRecName: Full=Zinc finger protein 418	Q8TF45	8.08324e-40	42	165.236	348	148
THRIPS_11_08_2011_00738	xpo1_mouse ame: full=exportin-1 short=exp1 ame: full=chromosome region maintenance 1 protein homolog	5039	gi|68053169|sp|Q6P5F9.1|XPO1_MOUSERecName: Full=Exportin-1; Short=Exp1; AltName: Full=Chromosome region maintenance 1 protein homolog	Q6P5F9	0	88	1609.35	1056	930
THRIPS_11_08_2011_00739	isoform a	2443	gi|110763758|ref|XP_395115.3|PREDICTED: similar to CG31992-PA, isoform A, partial [Apis mellifera]	XP_395115	3.9427e-36	83	158.303	106	88
THRIPS_11_08_2011_00740	lipp_myoco ame: full=pancreatic triacylglycerol lipase short=pl short=pancreatic lipase flags: precursor	4851	gi|2842671|sp|Q64425.1|LIPP_MYOCORecName: Full=Pancreatic triacylglycerol lipase; Short=PL; Short=Pancreatic lipase; Flags: Precursor	Q64425	9.89513e-25	47	117.087	283	135
THRIPS_11_08_2011_00742	hxk2_drome ame: full=hexokinase type 2	3147	gi|49066053|sp|Q9NFT7.4|HXK2_DROMERecName: Full=Hexokinase type 2	Q9NFT7	2.13787e-134	71	480.715	438	312
THRIPS_11_08_2011_00743	atp9b_bovin ame: full=probable phospholipid-transporting atpase iib ame: full=atpase class ii type 9b	4403	gi|218563488|sp|A1A4J6.1|ATP9B_BOVINRecName: Full=Probable phospholipid-transporting ATPase IIB; AltName: Full=ATPase class II type 9B	A1A4J6	0	81	1335.09	1040	850
THRIPS_11_08_2011_00744	spx2_mouse ame: full=sugar phosphate exchanger 2 ame: full=solute carrier family 37 member 2 ame: full=camp-inducible protein 2	3250	gi|81882079|sp|Q9WU81.1|SPX2_MOUSERecName: Full=Sugar phosphate exchanger 2; AltName: Full=Solute carrier family 37 member 2; AltName: Full=cAMP-inducible protein 2	Q9WU81	1.70701e-118	68	427.943	495	339
THRIPS_11_08_2011_00745	btbd3_mouse ame: full=btb poz domain-containing protein 3	2137	gi|20137287|sp|P58545.1|BTBD3_MOUSERecName: Full=BTB/POZ domain-containing protein 3	P58545	0	85	646.351	425	362
THRIPS_11_08_2011_00746	kc1g3_rat ame: full=casein kinase i isoform gamma-3 short=cki-gamma 3	4962	gi|3024055|sp|Q62763.1|KC1G3_RATRecName: Full=Casein kinase I isoform gamma-3; Short=CKI-gamma 3	Q62763	6.09651e-171	84	602.823	398	338
THRIPS_11_08_2011_00747	tp4a1_rat ame: full=protein tyrosine phosphatase type iva 1 ame: full=protein-tyrosine phosphatase 4a1 ame: full=protein-tyrosine phosphatase of regenerating liver 1 short=prl-1 flags: precursor	3336	gi|68566099|sp|Q78EG7.1|TP4A1_RATRecName: Full=Protein tyrosine phosphatase type IVA 1; AltName: Full=Protein-tyrosine phosphatase 4a1; AltName: Full=Protein-tyrosine phosphatase of regenerating liver 1; Short=PRL-1; Flags: Precursor >gi|68566171|sp|Q63739.1|TP4A1_MOUSE RecName: Full=Protein tyrosine phosphatase type IVA 1; AltName: Full=Protein-tyrosine phosphatase 4a1; AltName: Full=Protein-tyr…	Q78EG7	1.05041e-54	76	216.083	168	128
THRIPS_11_08_2011_00748	clcn3_human ame: full=h(+) cl(-) exchange transporter 3 ame: full=chloride channel protein 3 short= -3 ame: full=chloride transporter -3	4084	gi|226693513|sp|P51790.2|CLCN3_HUMANRecName: Full=H(+)/Cl(-) exchange transporter 3; AltName: Full=Chloride channel protein 3; Short=ClC-3; AltName: Full=Chloride transporter ClC-3 >gi|226694195|sp|O18894.3|CLCN3_RABIT RecName: Full=H(+)/Cl(-) exchange transporter 3; AltName: Full=Chloride channel protein 3; Short=ClC-3; AltName: Full=Chloride transporter ClC-3	P51790	0	78	838.565	745	588
THRIPS_11_08_2011_00749	modu_drome ame: full=dna-binding protein modulo	2036	gi|17380398|sp|P13469.2|MODU_DROMERecName: Full=DNA-binding protein modulo	P13469	3.23445e-08	40	60.8474	330	133
THRIPS_11_08_2011_00750	pelb_aspfc ame: full=probable pectin lyase b short=plb flags: precursor	1379	gi|296439731|sp|B0YCL3.2|PELB_ASPFCRecName: Full=Probable pectin lyase B; Short=PLB; Flags: Precursor	B0YCL3	5.95103e-45	54	182.185	317	174
THRIPS_11_08_2011_00751	osbl6_human ame: full=oxysterol-binding protein 6 short=orp-6 short=osbp-related protein 6	864	gi|20139133|sp|Q9BZF3.1|OSBL6_HUMANRecName: Full=Oxysterol-binding protein-related protein 6; Short=ORP-6; Short=OSBP-related protein 6	Q9BZF3	1.64583e-68	69	178.718	145	101
THRIPS_11_08_2011_00752	vp13c_human ame: full=vacuolar protein sorting-associated protein 13c	11750	gi|74712594|sp|Q709C8.1|VP13C_HUMANRecName: Full=Vacuolar protein sorting-associated protein 13C	Q709C8	0	52	1042.72	2366	1245
THRIPS_11_08_2011_00753	ud2c1_rabit ame: full=udp-glucuronosyltransferase 2c1 short=udpgt 2c1	1874	gi|549160|sp|P36514.1|UD2C1_RABITRecName: Full=UDP-glucuronosyltransferase 2C1; Short=UDPGT 2C1	P36514	3.40133e-57	49	223.402	468	231
THRIPS_11_08_2011_00754	snx18_mouse ame: full=sorting nexin-18 ame: full=sorting nexin-associated golgi protein 1	2768	gi|23822179|sp|Q91ZR2.1|SNX18_MOUSERecName: Full=Sorting nexin-18; AltName: Full=Sorting nexin-associated Golgi protein 1	Q91ZR2	3.36731e-35	65	150.984	175	115
THRIPS_11_08_2011_00755	cnot1_mouse ame: full=ccr4-not transcription complex subunit 1 ame: full=ccr4-associated factor 1	8454	gi|166216087|sp|Q6ZQ08.2|CNOT1_MOUSERecName: Full=CCR4-NOT transcription complex subunit 1; AltName: Full=CCR4-associated factor 1	Q6ZQ08	0	67	1333.55	1401	940
THRIPS_11_08_2011_00756	p4k2b_danre ame: full=phosphatidylinositol 4-kinase type 2-beta ame: full=phosphatidylinositol 4-kinase type ii-beta	2427	gi|123903349|sp|Q49GP5.1|P4K2B_DANRERecName: Full=Phosphatidylinositol 4-kinase type 2-beta; AltName: Full=Phosphatidylinositol 4-kinase type II-beta	Q49GP5	5.16177e-149	77	354.369	274	211
THRIPS_11_08_2011_00759	ubr4_human ame: full=e3 ubiquitin-protein ligase ubr4 ame: full=600 kda retinoblastoma protein-associated factor ame: full=n-recognin-4 ame: full=retinoblastoma-associated factor of 600 kda short=rbaf600 short=p600 ame: full=zinc finger ubr1-type protein 1	11456	gi|74744979|sp|Q5T4S7.1|UBR4_HUMANRecName: Full=E3 ubiquitin-protein ligase UBR4; AltName: Full=600 kDa retinoblastoma protein-associated factor; AltName: Full=N-recognin-4; AltName: Full=Retinoblastoma-associated factor of 600 kDa; Short=RBAF600; Short=p600; AltName: Full=Zinc finger UBR1-type protein 1	Q5T4S7	0	69	3534.58	3771	2614
THRIPS_11_08_2011_00765	tripb_human ame: full=thyroid receptor-interacting protein 11 short=tr-interacting protein 11 short=trip-11 ame: full=clonal evolution-related gene on chromosome 14 protein ame: full=golgi-associated microtubule-binding protein 210 short=gmap-210 ame: full=trip230	849	gi|292495059|sp|Q15643.3|TRIPB_HUMANRecName: Full=Thyroid receptor-interacting protein 11; Short=TR-interacting protein 11; Short=TRIP-11; AltName: Full=Clonal evolution-related gene on chromosome 14 protein; AltName: Full=Golgi-associated microtubule-binding protein 210; Short=GMAP-210; AltName: Full=Trip230	Q15643	1.03244e-29	61	130.568	204	125
THRIPS_11_08_2011_00767	topk_danre ame: full=lymphokine-activated killer t-cell-originated protein kinase homolog ame: full=pdz-binding kinase	251	gi|68789497|sp|Q6DHU8.1|TOPK_DANRERecName: Full=Lymphokine-activated killer T-cell-originated protein kinase homolog; AltName: Full=PDZ-binding kinase	Q6DHU8	1.71177e-06	49	51.2174	81	40
THRIPS_11_08_2011_00769	lonp2_mouse ame: full=lon protease homolog peroxisomal ame: full=lon protease-like protein 2 short=lon protease 2 ame: full=peroxisomal lon protease	203	gi|81906099|sp|Q9DBN5.1|LONP2_MOUSERecName: Full=Lon protease homolog 2, peroxisomal; AltName: Full=Lon protease-like protein 2; Short=Lon protease 2; AltName: Full=Peroxisomal Lon protease	Q9DBN5	6.34148e-17	74	85.8853	67	50
THRIPS_11_08_2011_00770	transposase is3 is911 family protein	203	gi|188591527|ref|YP_001796126.1|transposase, IS3 family [Cupriavidus taiwanensis] >gi|170938922|emb|CAP63923.1| transposase, IS3 family [Cupriavidus taiwanensis]	YP_001796126	8.03505e-23	85	110.153	67	57
THRIPS_11_08_2011_00773	ilpr_brala ame: full=insulin-like peptide receptor short=ilp receptor contains: ame: full=insulin-like peptide receptor alpha chain contains: ame: full=insulin-like peptide receptor beta chain flags: precursor	211	gi|2497557|sp|O02466.1|ILPR_BRALARecName: Full=Insulin-like peptide receptor; Short=ILP receptor; Contains: RecName: Full=Insulin-like peptide receptor alpha chain; Contains: RecName: Full=Insulin-like peptide receptor beta chain; Flags: Precursor	O02466	1.66261e-09	56	61.2326	69	39
THRIPS_11_08_2011_00782	parf_human ame: full= gtp-binding protein parf ame: full=partner of arf	2626	gi|125957950|sp|Q3YEC7.2|PARF_HUMANRecName: Full=Putative GTP-binding protein Parf; AltName: Full=Partner of ARF	Q3YEC7	1.21738e-10	53	69.3218	129	69
THRIPS_11_08_2011_00783	syym_drome ame: full=probable tyrosyl-trna mitochondrial ame: full=tyrosine--trna ligase short= flags: precursor	268	gi|50401704|sp|Q9W107.1|SYYM_DROMERecName: Full=Probable tyrosyl-tRNA synthetase, mitochondrial; AltName: Full=Tyrosine--tRNA ligase; Short=TyrRS; Flags: Precursor	Q9W107	4.28287e-13	64	73.1738	87	56
THRIPS_11_08_2011_00786	msto1_danre ame: full=protein misato homolog 1	251	gi|123888190|sp|Q1L908.1|MSTO1_DANRERecName: Full=Protein misato homolog 1	Q1L908	5.30887e-16	69	82.8037	68	47
THRIPS_11_08_2011_00788	lolal_drome ame: full=longitudinals lacking short=lola-like protein ame: full=protein batman	204	gi|73621174|sp|Q7KRI2.1|LOLAL_DROMERecName: Full=Longitudinals lacking protein-like; Short=Lola-like protein; AltName: Full=Protein Batman	Q7KRI2	1.32228e-14	76	78.1814	63	48
THRIPS_11_08_2011_00791	arhg7_rat ame: full=rho guanine nucleotide exchange factor 7 ame: full=beta-pix ame: full=pak-interacting exchange factor beta	820	gi|18202066|sp|O55043.1|ARHG7_RATRecName: Full=Rho guanine nucleotide exchange factor 7; AltName: Full=Beta-Pix; AltName: Full=PAK-interacting exchange factor beta	O55043	1.70933e-34	53	146.362	291	157
THRIPS_11_08_2011_00794	trio_human ame: full=triple functional domain protein ame: full=ptprf-interacting protein	1554	gi|257050981|sp|O75962.2|TRIO_HUMANRecName: Full=Triple functional domain protein; AltName: Full=PTPRF-interacting protein	O75962	1.85521e-98	72	360.147	397	286
THRIPS_11_08_2011_00804	tssc1_human ame: full=protein tssc1 ame: full=tumor-suppressing stf cdna 1 protein ame: full=tumor-suppressing subchromosomal transferable fragment candidate gene 1 protein	270	gi|84029603|sp|Q53HC9.2|TSSC1_HUMANRecName: Full=Protein TSSC1; AltName: Full=Tumor-suppressing STF cDNA 1 protein; AltName: Full=Tumor-suppressing subchromosomal transferable fragment candidate gene 1 protein	Q53HC9	3.15873e-16	60	83.5741	96	58
THRIPS_11_08_2011_00808	y114_chlmu ame: full=uncharacterized protein tc_0114	273	gi|30316295|sp|Q9PLI5.2|Y114_CHLMURecName: Full=Uncharacterized protein TC_0114	Q9PLI5	1.5713e-07	65	54.6842	44	29
THRIPS_11_08_2011_00810	x-linked retinitis pigmentosa gtpase regulator-like protein	386	gi|307176968|gb|EFN66274.1|X-linked retinitis pigmentosa GTPase regulator-like protein [Camponotus floridanus]	EFN66274	3.98109e-06	85	54.6842	34	29
THRIPS_11_08_2011_00812	down syndrome cell adhesion molecule-like protein 1	379	gi|307191135|gb|EFN74833.1|Down syndrome cell adhesion molecule-like protein 1 [Camponotus floridanus]	EFN74833	4.15037e-19	60	97.8265	123	74
THRIPS_11_08_2011_00816	ibtk_xenla ame: full=inhibitor of bruton tyrosine kinase short=ibtk	672	gi|82202103|sp|Q6NRS1.1|IBTK_XENLARecName: Full=Inhibitor of Bruton tyrosine kinase; Short=IBtk	Q6NRS1	4.84159e-07	60	54.6842	66	40
THRIPS_11_08_2011_00817	zn595_human ame: full=zinc finger protein 595	343	gi|55976737|sp|Q8IYB9.1|ZN595_HUMANRecName: Full=Zinc finger protein 595	Q8IYB9	4.67856e-12	64	69.707	71	46
THRIPS_11_08_2011_00819	sumf1_human ame: full=sulfatase-modifying factor 1 ame: full=c-alpha-formylglycine-generating enzyme 1 flags: precursor	205	gi|62298562|sp|Q8NBK3.3|SUMF1_HUMANRecName: Full=Sulfatase-modifying factor 1; AltName: Full=C-alpha-formylglycine-generating enzyme 1; Flags: Precursor	Q8NBK3	6.77057e-11	66	65.855	59	39
THRIPS_11_08_2011_00822	papog_human ame: full=poly polymerase gamma short=pap-gamma ame: full=neo-poly polymerase short=neo-pap ame: full=polynucleotide adenylyltransferase gamma ame: full=srp rna 3 -adenylating enzyme	420	gi|116242699|sp|Q9BWT3.2|PAPOG_HUMANRecName: Full=Poly(A) polymerase gamma; Short=PAP-gamma; AltName: Full=Neo-poly(A) polymerase; Short=Neo-PAP; AltName: Full=Polynucleotide adenylyltransferase gamma; AltName: Full=SRP RNA 3'-adenylating enzyme	Q9BWT3	1.04925e-06	76	51.9878	46	35
THRIPS_11_08_2011_00825	bbd14-like protein	651	gi|258512550|ref|YP_003185984.1|hypothetical protein Aaci_2591 [Alicyclobacillus acidocaldarius subsp. acidocaldarius DSM 446] >gi|257479276|gb|ACV59595.1| hypothetical protein Aaci_2591 [Alicyclobacillus acidocaldarius subsp. acidocaldarius DSM 446]	YP_003185984	3.61208e-09	51	65.855	91	47
THRIPS_11_08_2011_00828	ankyrin repeat-containing	207	gi|270003487|gb|EEZ99934.1|hypothetical protein TcasGA2_TC002730 [Tribolium castaneum]	EEZ99934	5.02284e-09	88	64.3142	35	31
THRIPS_11_08_2011_00830	hypothetical protein Eint_040520 [Encephalitozoon intestinalis ATCC 50506]	207	gi|303388938|ref|XP_003072702.1|hypothetical protein Eint_040520 [Encephalitozoon intestinalis ATCC 50506] >gi|303301844|gb|ADM11342.1| hypothetical protein Eint_040520 [Encephalitozoon intestinalis ATCC 50506]	XP_003072702	1.56659e-10	80	69.3218	68	55
THRIPS_11_08_2011_00831	m3k15_human ame: full=mitogen-activated protein kinase kinase kinase 15 ame: full=apoptosis signal-regulating kinase 3 ame: full=mapk erk kinase kinase 15 short=mek kinase 15 short=mekk 15	247	gi|116248533|sp|Q6ZN16.2|M3K15_HUMANRecName: Full=Mitogen-activated protein kinase kinase kinase 15; AltName: Full=Apoptosis signal-regulating kinase 3; AltName: Full=MAPK/ERK kinase kinase 15; Short=MEK kinase 15; Short=MEKK 15	Q6ZN16	1.19016e-15	61	81.6481	81	50
THRIPS_11_08_2011_00834	glym_human ame: full=serine mitochondrial short=shmt ame: full=glycine hydroxymethyltransferase ame: full=serine methylase flags: precursor	313	gi|6226865|sp|P34897.3|GLYM_HUMANRecName: Full=Serine hydroxymethyltransferase, mitochondrial; Short=SHMT; AltName: Full=Glycine hydroxymethyltransferase; AltName: Full=Serine methylase; Flags: Precursor	P34897	6.50625e-22	81	102.449	94	77
THRIPS_11_08_2011_00839	tudor domain-containing protein 7	307	gi|307207782|gb|EFN85400.1|Tudor domain-containing protein 7 [Harpegnathos saltator]	EFN85400	4.23812e-08	63	61.2326	90	57
THRIPS_11_08_2011_00841	f-box lrr-repeat protein 7	922	gi|270005259|gb|EFA01707.1|hypothetical protein TcasGA2_TC007283 [Tribolium castaneum]	EFA01707	2.00634e-11	70	74.3294	80	56
THRIPS_11_08_2011_00842	trafficking protein particle complex subunit 5	308	gi|307175097|gb|EFN65239.1|Trafficking protein particle complex subunit 5 [Camponotus floridanus]	EFN65239	1.40758e-11	93	72.7886	59	55
THRIPS_11_08_2011_00843	aktip_nemve ame: full=protein aktip homolog ame: full=fused toes protein homolog	240	gi|251764635|sp|A7RRG3.1|AKTIP_NEMVERecName: Full=Protein AKTIP homolog; AltName: Full=Fused toes protein homolog	A7RRG3	1.2004e-07	64	55.0694	62	40
THRIPS_11_08_2011_00844	klf13_human ame: full=krueppel-like factor 13 ame: full=basic transcription element-binding protein 3 short=bte-binding protein 3 ame: full=novel sp1-like zinc finger transcription factor 1 ame: full=rantes factor of late activated t-lymphocytes 1 short=rflat-1 ame: full=transcription factor bteb3 ame: full=transcription factor nslp1	1062	gi|17369913|sp|Q9Y2Y9.1|KLF13_HUMANRecName: Full=Krueppel-like factor 13; AltName: Full=Basic transcription element-binding protein 3; Short=BTE-binding protein 3; AltName: Full=Novel Sp1-like zinc finger transcription factor 1; AltName: Full=RANTES factor of late activated T-lymphocytes 1; Short=RFLAT-1; AltName: Full=Transcription factor BTEB3; AltName: Full=Transcription factor NSLP1	Q9Y2Y9	3.94224e-27	73	122.479	92	68
THRIPS_11_08_2011_00845	ptp10_drome ame: full=tyrosine-protein phosphatase 10d ame: full=receptor-linked protein-tyrosine phosphatase 10d short=dptp10d flags: precursor	305	gi|73920744|sp|P35992.3|PTP10_DROMERecName: Full=Tyrosine-protein phosphatase 10D; AltName: Full=Receptor-linked protein-tyrosine phosphatase 10D; Short=DPTP10D; Flags: Precursor	P35992	1.36395e-35	83	147.902	101	84
THRIPS_11_08_2011_00846	wahs7_human ame: full=wash complex subunit 7	474	gi|296452861|sp|Q2M389.2|WAHS7_HUMANRecName: Full=WASH complex subunit 7	Q2M389	6.08956e-53	79	206.068	158	126
THRIPS_11_08_2011_00855	midasin (midas-containing protein)	348	gi|307204947|gb|EFN83486.1|Midasin [Harpegnathos saltator]	EFN83486	4.02619e-14	72	81.2629	98	71
THRIPS_11_08_2011_00858	rna binding motif protein 34	452	gi|189237665|ref|XP_001812360.1|PREDICTED: similar to RNA binding motif protein 34 [Tribolium castaneum] >gi|270007816|gb|EFA04264.1| hypothetical protein TcasGA2_TC014554 [Tribolium castaneum]	XP_001812360	4.00015e-06	51	54.6842	143	73
THRIPS_11_08_2011_00862	cadm2_human ame: full=cell adhesion molecule 2 ame: full=immunoglobulin superfamily member 4d short= 4d ame: full=nectin-like protein 3 short=necl-3 flags: precursor	200	gi|74759850|sp|Q8N3J6.1|CADM2_HUMANRecName: Full=Cell adhesion molecule 2; AltName: Full=Immunoglobulin superfamily member 4D; Short=IgSF4D; AltName: Full=Nectin-like protein 3; Short=NECL-3; Flags: Precursor	Q8N3J6	8.61654e-06	52	48.9062	63	33
THRIPS_11_08_2011_00873	ece2_human ame: full=endothelin-converting enzyme 2 short=ece-2 includes: ame: full=methyltransferase-like region includes: ame: full=endothelin-converting enzyme 2 region	209	gi|215274248|sp|O60344.4|ECE2_HUMANRecName: Full=Endothelin-converting enzyme 2; Short=ECE-2; Includes: RecName: Full=Methyltransferase-like region; Includes: RecName: Full=Endothelin-converting enzyme 2 region	O60344	1.66261e-09	67	61.2326	67	45
THRIPS_11_08_2011_00874	rna polymerase ii subunit a c-terminal domain phosphatase	202	gi|91087589|ref|XP_971974.1|PREDICTED: similar to RNA polymerase II subunit A C-terminal domain phosphatase [Tribolium castaneum] >gi|270010700|gb|EFA07148.1| hypothetical protein TcasGA2_TC010139 [Tribolium castaneum]	XP_971974	6.83371e-06	69	53.9138	52	36
THRIPS_11_08_2011_00877	ppil4_human ame: full=peptidyl-prolyl cis-trans isomerase-like 4 short=ppiase ame: full=cyclophilin-like protein ppil4 ame: full=rotamase ppil4	536	gi|74760546|sp|Q8WUA2.1|PPIL4_HUMANRecName: Full=Peptidyl-prolyl cis-trans isomerase-like 4; Short=PPIase; AltName: Full=Cyclophilin-like protein PPIL4; AltName: Full=Rotamase PPIL4	Q8WUA2	4.94896e-58	78	223.402	167	131
THRIPS_11_08_2011_00883	phkg1_human ame: full=phosphorylase b kinase gamma catalytic skeletal muscle isoform ame: full=phosphorylase kinase subunit gamma-1	1155	gi|2833281|sp|Q16816.3|PHKG1_HUMANRecName: Full=Phosphorylase b kinase gamma catalytic chain, skeletal muscle isoform; AltName: Full=Phosphorylase kinase subunit gamma-1	Q16816	3.85589e-55	62	215.698	224	140
THRIPS_11_08_2011_00887	nbas_human ame: full=neuroblastoma-amplified sequence ame: full=neuroblastoma-amplified gene protein	1473	gi|224471843|sp|A2RRP1.2|NBAS_HUMANRecName: Full=Neuroblastoma-amplified sequence; AltName: Full=Neuroblastoma-amplified gene protein	A2RRP1	2.00175e-62	53	240.35	504	270
THRIPS_11_08_2011_00894	cnot3_mouse ame: full=ccr4-not transcription complex subunit 3 ame: full=ccr4-associated factor 3	893	gi|46395889|sp|Q8K0V4.1|CNOT3_MOUSERecName: Full=CCR4-NOT transcription complex subunit 3; AltName: Full=CCR4-associated factor 3	Q8K0V4	5.32084e-48	73	191.43	221	163
THRIPS_11_08_2011_00895	trnt1_mouse ame: full=trna-nucleotidyltransferase mitochondrial ame: full=mitochondrial trna nucleotidyl cca-adding short=mt cca-adding enzyme short=mt trna cca-diphosphorylase short=mt trna cca-pyrophosphorylase short=mt trna adenylyltransferase flags: precursor	810	gi|37537798|sp|Q8K1J6.1|TRNT1_MOUSERecName: Full=tRNA-nucleotidyltransferase 1, mitochondrial; AltName: Full=mitochondrial tRNA nucleotidyl transferase, CCA-adding; Short=mt CCA-adding enzyme; Short=mt tRNA CCA-diphosphorylase; Short=mt tRNA CCA-pyrophosphorylase; Short=mt tRNA adenylyltransferase; Flags: Precursor	Q8K1J6	3.72658e-42	60	171.785	274	165
THRIPS_11_08_2011_00897	inositol polyphosphate 1-phosphatase	200	gi|260788977|ref|XP_002589525.1|hypothetical protein BRAFLDRAFT_251702 [Branchiostoma floridae] >gi|229274703|gb|EEN45536.1| hypothetical protein BRAFLDRAFT_251702 [Branchiostoma floridae]	XP_002589525	2.78361e-07	71	58.5362	53	38
THRIPS_11_08_2011_00898	wipi3_xentr ame: full=wd repeat domain phosphoinositide-interacting protein 3 short=wipi-3 ame: full=wd repeat-containing protein 45-like short=wdr45-like protein	779	gi|82234110|sp|Q640T2.1|WIPI3_XENTRRecName: Full=WD repeat domain phosphoinositide-interacting protein 3; Short=WIPI-3; AltName: Full=WD repeat-containing protein 45-like; Short=WDR45-like protein	Q640T2	2.75247e-87	88	321.627	206	183
THRIPS_11_08_2011_00899	nbas_danre ame: full=neuroblastoma-amplified sequence ame: full=neuroblastoma-amplified gene protein homolog	1335	gi|82232910|sp|Q5TYW4.1|NBAS_DANRERecName: Full=Neuroblastoma-amplified sequence; AltName: Full=Neuroblastoma-amplified gene protein homolog	Q5TYW4	1.40093e-43	57	177.563	239	138
THRIPS_11_08_2011_00900	phd finger protein	998	gi|156541811|ref|XP_001602710.1|PREDICTED: similar to phd finger protein [Nasonia vitripennis]	XP_001602710	6.62915e-11	50	72.7886	148	75
THRIPS_11_08_2011_00901	unknown [Helicoverpa armigera]	2163	gi|156968291|gb|ABU98617.1|unknown [Helicoverpa armigera]	ABU98617	2.22986e-11	42	75.8702	205	87
THRIPS_11_08_2011_00903	serp2_human ame: full=stress-associated endoplasmic reticulum protein 2 ame: full=ribosome-associated membrane protein ramp4-2	650	gi|74751068|sp|Q8N6R1.1|SERP2_HUMANRecName: Full=Stress-associated endoplasmic reticulum protein 2; AltName: Full=Ribosome-associated membrane protein RAMP4-2 >gi|122140341|sp|Q3T073.1|SERP2_BOVIN RecName: Full=Stress-associated endoplasmic reticulum protein 2; AltName: Full=Ribosome-associated membrane protein RAMP4-2 >gi|125987634|sp|Q6TAW2.2|SERP2_MOUSE RecName: Full=Stress-associated endoplas…	Q8N6R1	1.0772e-16	88	86.6557	51	45
THRIPS_11_08_2011_00904	pde4b_drome ame: full=camp-specific 3 -cyclic phosphodiesterase ame: full=learning memory process protein ame: full=protein dunce	2027	gi|73620981|sp|P12252.4|PDE4B_DROMERecName: Full=cAMP-specific 3',5'-cyclic phosphodiesterase; AltName: Full=Learning/memory process protein; AltName: Full=Protein dunce	P12252	0	79	676.396	511	406
THRIPS_11_08_2011_00905	rl7a_drome ame: full=60s ribosomal protein l7a	922	gi|76803818|sp|P46223.2|RL7A_DROMERecName: Full=60S ribosomal protein L7a	P46223	4.68753e-95	88	347.821	232	206
THRIPS_11_08_2011_00906	jip4_mouse ame: full=c-jun-amino-terminal kinase-interacting protein 4 short=jip-4 short=jnk-interacting protein 4 ame: full=jnk-associated leucine-zipper protein short=jlp ame: full=jnk sapk-associated protein 2 short=jsap2 ame: full=mitogen-activated protein kinase 8-interacting protein 4 ame: full=sperm-associated antigen 9	4467	gi|94717649|sp|Q58A65.2|JIP4_MOUSERecName: Full=C-Jun-amino-terminal kinase-interacting protein 4; Short=JIP-4; Short=JNK-interacting protein 4; AltName: Full=JNK-associated leucine-zipper protein; Short=JLP; AltName: Full=JNK/SAPK-associated protein 2; Short=JSAP2; AltName: Full=Mitogen-activated protein kinase 8-interacting protein 4; AltName: Full=Sperm-associated antigen 9	Q58A65	1.2215e-138	80	495.352	368	297
THRIPS_11_08_2011_00908	rs15_elaol ame: full=40s ribosomal protein s15	680	gi|27923849|sp|Q945U1.1|RS15_ELAOLRecName: Full=40S ribosomal protein S15	Q945U1	2.65698e-58	93	203.371	116	109
THRIPS_11_08_2011_00909	pcnp_bovin ame: full=pest proteolytic signal-containing nuclear protein short=pcnp short=pest-containing nuclear protein	964	gi|110815905|sp|Q32PF3.1|PCNP_BOVINRecName: Full=PEST proteolytic signal-containing nuclear protein; Short=PCNP; Short=PEST-containing nuclear protein	Q32PF3	1.49087e-14	60	80.4925	136	82
THRIPS_11_08_2011_00911	gst1d_anoga ame: full=glutathione s-transferase isoform d ame: full= st1-alpha ame: full=aggst1-1 ame: full=aggst1-6 ame: full=aggst2-1 ame: full=gst class-theta	1164	gi|2842718|sp|Q93113.1|GST1D_ANOGARecName: Full=Glutathione S-transferase 1, isoform D; AltName: Full=AgGst1-alpha; AltName: Full=Aggst1-1; AltName: Full=Aggst1-6; AltName: Full=Aggst2-1; AltName: Full=GST class-theta	Q93113	8.45272e-34	56	144.821	193	110
THRIPS_11_08_2011_00913	ten3_danre ame: full=teneurin-3 short=ten-3 ame: full=protein odd oz ten-m homolog 3 ame: full=tenascin-m3 short=ten-m3	815	gi|82120398|sp|Q9W7R4.1|TEN3_DANRERecName: Full=Teneurin-3; Short=Ten-3; AltName: Full=Protein Odd Oz/ten-m homolog 3; AltName: Full=Tenascin-M3; Short=Ten-m3	Q9W7R4	4.20286e-17	53	88.5817	177	94
THRIPS_11_08_2011_00914	titin_mouse ame: full=titin ame: full=connectin	463	gi|160358754|sp|A2ASS6.1|TITIN_MOUSERecName: Full=Titin; AltName: Full=Connectin	A2ASS6	1.17272e-13	48	75.485	141	68
THRIPS_11_08_2011_00915	hmgcl_bovin ame: full=hydroxymethylglutaryl- mitochondrial short=hl short=hmg- lyase ame: full=3-hydroxy-3-methylglutarate- lyase flags: precursor	1328	gi|116242512|sp|Q29448.2|HMGCL_BOVINRecName: Full=Hydroxymethylglutaryl-CoA lyase, mitochondrial; Short=HL; Short=HMG-CoA lyase; AltName: Full=3-hydroxy-3-methylglutarate-CoA lyase; Flags: Precursor	Q29448	2.35295e-75	83	283.108	200	166
THRIPS_11_08_2011_00917	mpu1_mouse ame: full=mannose-p-dolichol utilization defect 1 protein ame: full=suppressor of lec15 and lec35 glycosylation mutation homolog short=sl15	904	gi|12643841|sp|Q9R0Q9.1|MPU1_MOUSERecName: Full=Mannose-P-dolichol utilization defect 1 protein; AltName: Full=Suppressor of Lec15 and Lec35 glycosylation mutation homolog; Short=SL15	Q9R0Q9	8.73638e-06	73	51.2174	41	30
THRIPS_11_08_2011_00918	k1143_bovin ame: full=uncharacterized protein kiaa1143 homolog	1926	gi|114149733|sp|Q3MHJ0.1|K1143_BOVINRecName: Full=Uncharacterized protein KIAA1143 homolog	Q3MHJ0	3.68881e-14	61	80.4925	133	82
THRIPS_11_08_2011_00919	glcm_mouse ame: full=glucosylceramidase ame: full=acid beta-glucosidase ame: full=beta-glucocerebrosidase ame: full=d-glucosyl-n-acylsphingosine glucohydrolase flags: precursor	1362	gi|121284|sp|P17439.1|GLCM_MOUSERecName: Full=Glucosylceramidase; AltName: Full=Acid beta-glucosidase; AltName: Full=Beta-glucocerebrosidase; AltName: Full=D-glucosyl-N-acylsphingosine glucohydrolase; Flags: Precursor	P17439	7.11282e-59	59	228.409	287	172
THRIPS_11_08_2011_00921	pur2_chick ame: full=trifunctional purine biosynthetic protein adenosine-3 includes: ame: full=phosphoribosylamine--glycine ligase ame: full=glycinamide ribonucleotide synthetase short=gars ame: full=phosphoribosylglycinamide synthetase includes: ame: full=phosphoribosylformylglycinamidine cyclo-ligase ame: full=air synthase short=airs ame: full=phosphoribosyl-aminoimidazole synthetase includes: …	3283	gi|131612|sp|P21872.1|PUR2_CHICKRecName: Full=Trifunctional purine biosynthetic protein adenosine-3; Includes: RecName: Full=Phosphoribosylamine--glycine ligase; AltName: Full=Glycinamide ribonucleotide synthetase; Short=GARS; AltName: Full=Phosphoribosylglycinamide synthetase; Includes: RecName: Full=Phosphoribosylformylglycinamidine cyclo-ligase; AltName: Full=AIR synthase; Short=AIRS; AltName:…	P21872	0	71	1012.29	996	708
THRIPS_11_08_2011_00923	ptp1_encin ame: full=polar tube protein 1 ame: full=major polar tube protein short=major ptp flags: precursor	715	gi|74588237|sp|Q5F2J0.1|PTP1_ENCINRecName: Full=Polar tube protein 1; AltName: Full=Major polar tube protein; Short=Major PTP; Flags: Precursor	Q5F2J0	8.93157e-18	59	90.5077	110	65
THRIPS_11_08_2011_00924	rs15a_drome ame: full=40s ribosomal protein s15aa	810	gi|1350954|sp|P48149.2|RS15A_DROMERecName: Full=40S ribosomal protein S15Aa >gi|60396627|sp|Q6XIM8.3|RS15A_DROYA RecName: Full=40S ribosomal protein S15a	P48149	1.55482e-64	96	246.128	130	125
THRIPS_11_08_2011_00926	marh6_human ame: full=e3 ubiquitin-protein ligase march6 ame: full=doa10 homolog ame: full=membrane-associated ring finger protein 6 ame: full=membrane-associated ring-ch protein vi short=march-vi ame: full=protein teb-4 ame: full=ring finger protein 176	1840	gi|125951898|sp|O60337.2|MARH6_HUMANRecName: Full=E3 ubiquitin-protein ligase MARCH6; AltName: Full=Doa10 homolog; AltName: Full=Membrane-associated RING finger protein 6; AltName: Full=Membrane-associated RING-CH protein VI; Short=MARCH-VI; AltName: Full=Protein TEB-4; AltName: Full=RING finger protein 176	O60337	3.28829e-97	70	356.295	321	227
THRIPS_11_08_2011_00927	rs21_bommo ame: full=40s ribosomal protein s21	791	gi|74837362|sp|Q6PUF8.1|RS21_BOMMORecName: Full=40S ribosomal protein S21 >gi|74844827|sp|Q962Q8.1|RS21_SPOFR RecName: Full=40S ribosomal protein S21	Q6PUF8	2.12698e-34	90	145.976	83	75
THRIPS_11_08_2011_00930	leukotriene a-4 hydrolase	273	gi|307176964|gb|EFN66270.1|Leukotriene A-4 hydrolase [Camponotus floridanus]	EFN66270	8.02057e-07	74	56.9954	43	32
THRIPS_11_08_2011_00932	eif3d_anoga ame: full=eukaryotic translation initiation factor 3 subunit d short=eif3d ame: full=eukaryotic translation initiation factor 3 subunit 7	379	gi|223635154|sp|Q7QBW3.3|EIF3D_ANOGARecName: Full=Eukaryotic translation initiation factor 3 subunit D; Short=eIF3d; AltName: Full=Eukaryotic translation initiation factor 3 subunit 7	Q7QBW3	1.44273e-13	84	74.7146	44	37
THRIPS_11_08_2011_00937	rm19_drome ame: full=39s ribosomal protein mitochondrial short=l19mt short=mrp-l19 flags: precursor	657	gi|22001930|sp|Q9VHN6.1|RM19_DROMERecName: Full=39S ribosomal protein L19, mitochondrial; Short=L19mt; Short=MRP-L19; Flags: Precursor	Q9VHN6	5.08139e-46	68	107.457	106	73
THRIPS_11_08_2011_00939	amer1_ponab ame: full=amme syndrome candidate gene 1 protein homolog	681	gi|75041928|sp|Q5RAS7.1|AMER1_PONABRecName: Full=AMME syndrome candidate gene 1 protein homolog	Q5RAS7	2.80394e-26	80	118.627	77	62
THRIPS_11_08_2011_00945	isoform b	713	gi|149898792|gb|ABR27858.1|hypothetical protein [Triatoma infestans]	ABR27858	5.86867e-37	78	138.658	88	69
THRIPS_11_08_2011_00946	blm_drome ame: full=bloom syndrome protein homolog short=dmblm ame: full=mutagen-sensitive protein 309 ame: full= helicase homolog	524	gi|17366114|sp|Q9VGI8.1|BLM_DROMERecName: Full=Bloom syndrome protein homolog; Short=Dmblm; AltName: Full=Mutagen-sensitive protein 309; AltName: Full=RecQ helicase homolog	Q9VGI8	2.11221e-26	57	118.242	176	102
THRIPS_11_08_2011_00947	tim_drome ame: full=protein timeless	742	gi|6175063|sp|P49021.2|TIM_DROMERecName: Full=Protein timeless	P49021	6.37876e-39	82	104.76	73	60
THRIPS_11_08_2011_00948	dlgp4_human ame: full=disks large-associated protein 4 short=dap-4 ame: full=psd-95 sap90-binding protein 4 ame: full=sap90 psd-95-associated protein 4 short=sapap-4	898	gi|205831580|sp|Q9Y2H0.3|DLGP4_HUMANRecName: Full=Disks large-associated protein 4; Short=DAP-4; AltName: Full=PSD-95/SAP90-binding protein 4; AltName: Full=SAP90/PSD-95-associated protein 4; Short=SAPAP-4	Q9Y2H0	3.11912e-10	59	46.2098	69	41
THRIPS_11_08_2011_00949	nipbl_mouse ame: full=nipped-b-like protein ame: full=delangin homolog ame: full=scc2 homolog	404	gi|50400866|sp|Q6KCD5.1|NIPBL_MOUSERecName: Full=Nipped-B-like protein; AltName: Full=Delangin homolog; AltName: Full=SCC2 homolog	Q6KCD5	8.7299e-35	79	145.206	121	96
THRIPS_11_08_2011_00951	ilvbl_danre ame: full=acetolactate synthase-like protein ame: full= -like protein	744	gi|82185629|sp|Q6NV04.1|ILVBL_DANRERecName: Full=Acetolactate synthase-like protein; AltName: Full=IlvB-like protein	Q6NV04	1.3645e-48	72	192.971	222	161
THRIPS_11_08_2011_00952	gblp_drome ame: full=guanine nucleotide-binding protein subunit beta-like protein ame: full=receptor of activated protein kinase c homolog	1088	gi|14286121|sp|O18640.2|GBLP_DROMERecName: Full=Guanine nucleotide-binding protein subunit beta-like protein; AltName: Full=Receptor of activated protein kinase C homolog	O18640	1.87611e-157	91	555.444	307	280
THRIPS_11_08_2011_00953	y7597_drome ame: full=cell division cycle 2-like protein kinase cg7597	1696	gi|75027263|sp|Q9VP22.1|Y7597_DROMERecName: Full=Cell division cycle 2-like protein kinase CG7597	Q9VP22	1.42432e-89	93	238.039	126	118
THRIPS_11_08_2011_00957	papss_ureca ame: full=bifunctional 3 -phosphoadenosine 5 -phosphosulfate synthase short=paps synthase short=papss ame: full=sulfurylase kinase short=sk includes: ame: full=sulfate adenylyltransferase ame: full=atp-sulfurylase ame: full=sulfate adenylate transferase short=sat includes: ame: full=adenylyl-sulfate kinase ame: full=3 -phosphoadenosine-5 -phosphosulfate synthase ame: full=aps kinase a…	2958	gi|25090938|sp|Q27128.1|PAPSS_URECARecName: Full=Bifunctional 3'-phosphoadenosine 5'-phosphosulfate synthase; Short=PAPS synthase; Short=PAPSS; AltName: Full=Sulfurylase kinase; Short=SK; Includes: RecName: Full=Sulfate adenylyltransferase; AltName: Full=ATP-sulfurylase; AltName: Full=Sulfate adenylate transferase; Short=SAT; Includes: RecName: Full=Adenylyl-sulfate kinase; AltName: Full=3'-phosp…	Q27128	3.41116e-142	83	506.523	357	298
THRIPS_11_08_2011_00960	srp68_drome ame: full=signal recognition particle 68 kda protein short=srp68	2085	gi|12230644|sp|Q9VSS2.1|SRP68_DROMERecName: Full=Signal recognition particle 68 kDa protein; Short=SRP68	Q9VSS2	1.29056e-153	72	543.888	572	413
THRIPS_11_08_2011_00962	mgat1_rabit ame: full=alpha- -mannosyl-glycoprotein 2-beta-n-acetylglucosaminyltransferase ame: full=n-glycosyl-oligosaccharide-glycoprotein n-acetylglucosaminyltransferase i short=gnt-i short= c-t i	1490	gi|121144|sp|P27115.1|MGAT1_RABITRecName: Full=Alpha-1,3-mannosyl-glycoprotein 2-beta-N-acetylglucosaminyltransferase; AltName: Full=N-glycosyl-oligosaccharide-glycoprotein N-acetylglucosaminyltransferase I; Short=GNT-I; Short=GlcNAc-T I	P27115	9.33712e-92	79	337.806	271	215
THRIPS_11_08_2011_00963	pre-mrna cleavage complex 2 protein pcf11	2340	gi|307186073|gb|EFN71805.1|Pre-mRNA cleavage complex 2 protein Pcf11 [Camponotus floridanus]	EFN71805	3.31774e-08	80	65.4698	51	41
THRIPS_11_08_2011_00965	osbp1_human ame: full=oxysterol-binding protein 1	4704	gi|129308|sp|P22059.1|OSBP1_HUMANRecName: Full=Oxysterol-binding protein 1	P22059	0	66	647.121	646	430
THRIPS_11_08_2011_00966	liph_human ame: full=lipase member h ame: full=lpd lipase-related protein ame: full=membrane-associated phosphatidic acid-selective phospholipase a1-alpha short=mpa-pla1 alpha ame: full=phospholipase a1 member b flags: precursor	2585	gi|74762634|sp|Q8WWY8.1|LIPH_HUMANRecName: Full=Lipase member H; AltName: Full=LPD lipase-related protein; AltName: Full=Membrane-associated phosphatidic acid-selective phospholipase A1-alpha; Short=mPA-PLA1 alpha; AltName: Full=Phospholipase A1 member B; Flags: Precursor	Q8WWY8	2.39365e-35	51	151.369	256	132
THRIPS_11_08_2011_00967	tbcel_mouse ame: full=tubulin-specific chaperone cofactor e-like protein ame: full=leucine-rich repeat-containing protein 35	3168	gi|81914048|sp|Q8C5W3.1|TBCEL_MOUSERecName: Full=Tubulin-specific chaperone cofactor E-like protein; AltName: Full=Leucine-rich repeat-containing protein 35	Q8C5W3	3.51542e-60	53	234.187	468	252
THRIPS_11_08_2011_00969	kgp25_drome ame: full=cgmp-dependent protein isozyme 2 forms cd5 t2 short=cgk ame: full=foraging protein	3620	gi|59799774|sp|P32023.3|KGP25_DROMERecName: Full=cGMP-dependent protein kinase, isozyme 2 forms cD5/T2; Short=cGK; AltName: Full=Foraging protein	P32023	0	92	638.647	378	349
THRIPS_11_08_2011_00971	vglm_tswv ame: full=envelope glycoprotein short=gp ame: full=m polyprotein contains: ame: full=glycoprotein g1 contains: ame: full=glycoprotein g2 flags: precursor	4840	gi|46396572|sp|O55647.1|VGLM_TSWVRecName: Full=Envelope glycoprotein; Short=GP; AltName: Full=M polyprotein; Contains: RecName: Full=Glycoprotein G1; Contains: RecName: Full=Glycoprotein G2; Flags: Precursor	O55647	0	98	2196.39	1135	1116
THRIPS_11_08_2011_00972	slk_mouse ame: full=ste20-like serine threonine-protein kinase short=ste20-like kinase short=mslk ame: full=etk4 ame: full=ste20-related kinase smak ame: full=ste20-related serine threonine-protein kinase short=ste20-related kinase ame: full=serine threonine-protein kinase 2	5680	gi|94730572|sp|O54988.2|SLK_MOUSERecName: Full=STE20-like serine/threonine-protein kinase; Short=STE20-like kinase; Short=mSLK; AltName: Full=Etk4; AltName: Full=STE20-related kinase SMAK; AltName: Full=STE20-related serine/threonine-protein kinase; Short=STE20-related kinase; AltName: Full=Serine/threonine-protein kinase 2	O54988	3.67045e-103	69	377.867	403	280
THRIPS_11_08_2011_00973	kgp25_drome ame: full=cgmp-dependent protein isozyme 2 forms cd5 t2 short=cgk ame: full=foraging protein	6014	gi|59799774|sp|P32023.3|KGP25_DROMERecName: Full=cGMP-dependent protein kinase, isozyme 2 forms cD5/T2; Short=cGK; AltName: Full=Foraging protein	P32023	0	91	719.539	430	393
THRIPS_11_08_2011_00974	slk_mouse ame: full=ste20-like serine threonine-protein kinase short=ste20-like kinase short=mslk ame: full=etk4 ame: full=ste20-related kinase smak ame: full=ste20-related serine threonine-protein kinase short=ste20-related kinase ame: full=serine threonine-protein kinase 2	5396	gi|94730572|sp|O54988.2|SLK_MOUSERecName: Full=STE20-like serine/threonine-protein kinase; Short=STE20-like kinase; Short=mSLK; AltName: Full=Etk4; AltName: Full=STE20-related kinase SMAK; AltName: Full=STE20-related serine/threonine-protein kinase; Short=STE20-related kinase; AltName: Full=Serine/threonine-protein kinase 2	O54988	3.47453e-103	69	377.867	403	280
THRIPS_11_08_2011_00975	vata_anoga ame: full=v-type proton atpase catalytic subunit a short=v-atpase subunit a ame: full=v-atpase 69 kda subunit ame: full=vacuolar proton pump subunit alpha	3387	gi|74780873|sp|Q5TTG1.1|VATA_ANOGARecName: Full=V-type proton ATPase catalytic subunit A; Short=V-ATPase subunit A; AltName: Full=V-ATPase 69 kDa subunit; AltName: Full=Vacuolar proton pump subunit alpha	Q5TTG1	0	97	1122.46	597	580
THRIPS_11_08_2011_00976	insr_aedae ame: full=insulin-like receptor short=mir contains: ame: full=insulin-like receptor alpha chain contains: ame: full=insulin-like receptor beta chain flags: precursor	4545	gi|205371763|sp|Q93105.2|INSR_AEDAERecName: Full=Insulin-like receptor; Short=MIR; Contains: RecName: Full=Insulin-like receptor alpha chain; Contains: RecName: Full=Insulin-like receptor beta chain; Flags: Precursor	Q93105	0	59	719.153	980	585
THRIPS_11_08_2011_00977	mgat2_mouse ame: full=alpha- -mannosyl-glycoprotein 2-beta-n-acetylglucosaminyltransferase ame: full=beta- -n-acetylglucosaminyltransferase ii ame: full= c-t ii short=gnt-ii ame: full=mannoside acetylglucosaminyltransferase 2 ame: full=n-glycosyl-oligosaccharide-glycoprotein n-acetylglucosaminyltransferase ii	3248	gi|68052854|sp|Q921V5.1|MGAT2_MOUSERecName: Full=Alpha-1,6-mannosyl-glycoprotein 2-beta-N-acetylglucosaminyltransferase; AltName: Full=Beta-1,2-N-acetylglucosaminyltransferase II; AltName: Full=GlcNAc-T II; Short=GNT-II; AltName: Full=Mannoside acetylglucosaminyltransferase 2; AltName: Full=N-glycosyl-oligosaccharide-glycoprotein N-acetylglucosaminyltransferase II	Q921V5	8.23515e-97	68	355.91	332	226
THRIPS_11_08_2011_00978	marh6_human ame: full=e3 ubiquitin-protein ligase march6 ame: full=doa10 homolog ame: full=membrane-associated ring finger protein 6 ame: full=membrane-associated ring-ch protein vi short=march-vi ame: full=protein teb-4 ame: full=ring finger protein 176	3316	gi|125951898|sp|O60337.2|MARH6_HUMANRecName: Full=E3 ubiquitin-protein ligase MARCH6; AltName: Full=Doa10 homolog; AltName: Full=Membrane-associated RING finger protein 6; AltName: Full=Membrane-associated RING-CH protein VI; Short=MARCH-VI; AltName: Full=Protein TEB-4; AltName: Full=RING finger protein 176	O60337	4.22998e-56	74	220.705	231	171
THRIPS_11_08_2011_00979	vatc_manse ame: full=v-type proton atpase subunit c short=v-atpase subunit c ame: full=vacuolar proton pump subunit c	3388	gi|12585498|sp|Q9U5N1.1|VATC_MANSERecName: Full=V-type proton ATPase subunit C; Short=V-ATPase subunit C; AltName: Full=Vacuolar proton pump subunit C	Q9U5N1	4.04884e-179	88	629.402	383	338
THRIPS_11_08_2011_00980	lig_drops ame: full=protein lingerer	4045	gi|221222522|sp|Q290X3.3|LIG_DROPSRecName: Full=Protein lingerer	Q290X3	3.52451e-36	55	154.836	302	167
THRIPS_11_08_2011_00982	reverse transcriptase	1905	gi|270016636|gb|EFA13082.1|hypothetical protein TcasGA2_TC011582 [Tribolium castaneum]	EFA13082	3.25785e-11	46	75.0998	222	104
THRIPS_11_08_2011_00983	mixed-lineage leukemia mll	1822	gi|110764982|ref|XP_394941.3|PREDICTED: similar to CG5591-PA, partial [Apis mellifera]	XP_394941	1.92928e-21	61	108.997	162	100
THRIPS_11_08_2011_00984	tnr6a_mouse ame: full=trinucleotide repeat-containing gene 6a protein	1868	gi|123791339|sp|Q3UHK8.1|TNR6A_MOUSERecName: Full=Trinucleotide repeat-containing gene 6A protein	Q3UHK8	3.21527e-07	42	57.3806	187	79
THRIPS_11_08_2011_00985	anr11_human ame: full=ankyrin repeat domain-containing protein 11 ame: full=ankyrin repeat-containing cofactor 1	2270	gi|296439440|sp|Q6UB99.3|ANR11_HUMANRecName: Full=Ankyrin repeat domain-containing protein 11; AltName: Full=Ankyrin repeat-containing cofactor 1	Q6UB99	1.85797e-52	67	207.994	237	160
THRIPS_11_08_2011_00987	tbl2_mouse ame: full=transducin beta-like protein 2	866	gi|12230717|sp|Q9R099.1|TBL2_MOUSERecName: Full=Transducin beta-like protein 2	Q9R099	1.27222e-06	73	53.9138	41	30
THRIPS_11_08_2011_00989	vatd_manse ame: full=v-type proton atpase subunit d short=v-atpase subunit d ame: full=vacuolar proton pump subunit d	1949	gi|12585494|sp|Q9U0S4.1|VATD_MANSERecName: Full=V-type proton ATPase subunit D; Short=V-ATPase subunit D; AltName: Full=Vacuolar proton pump subunit D	Q9U0S4	1.17236e-100	96	367.851	207	199
THRIPS_11_08_2011_00991	riok2_mouse ame: full=serine threonine-protein kinase rio2 ame: full=rio kinase 2	2096	gi|56404954|sp|Q9CQS5.1|RIOK2_MOUSERecName: Full=Serine/threonine-protein kinase RIO2; AltName: Full=RIO kinase 2	Q9CQS5	3.79395e-119	84	232.646	157	133
THRIPS_11_08_2011_00992	al4a1_danre ame: full=delta-1-pyrroline-5-carboxylate mitochondrial short=p5c dehydrogenase ame: full=aldehyde dehydrogenase family 4 member a1 flags: precursor	3778	gi|85542188|sp|Q7SY23.1|AL4A1_DANRERecName: Full=Delta-1-pyrroline-5-carboxylate dehydrogenase, mitochondrial; Short=P5C dehydrogenase; AltName: Full=Aldehyde dehydrogenase family 4 member A1; Flags: Precursor	Q7SY23	0	76	643.654	535	409
THRIPS_11_08_2011_00994	ampl_xentr ame: full=cytosol aminopeptidase ame: full=leucine aminopeptidase 3 short=lap-3 ame: full=leucyl aminopeptidase ame: full=proline aminopeptidase ame: full=prolyl aminopeptidase	1727	gi|82180245|sp|Q5XGB9.1|AMPL_XENTRRecName: Full=Cytosol aminopeptidase; AltName: Full=Leucine aminopeptidase 3; Short=LAP-3; AltName: Full=Leucyl aminopeptidase; AltName: Full=Proline aminopeptidase; AltName: Full=Prolyl aminopeptidase	Q5XGB9	2.92226e-132	67	472.626	479	323
THRIPS_11_08_2011_00995	med7_anoga ame: full=mediator of rna polymerase ii transcription subunit 7 ame: full=mediator complex subunit 7	1767	gi|74799995|sp|Q7PR68.2|MED7_ANOGARecName: Full=Mediator of RNA polymerase II transcription subunit 7; AltName: Full=Mediator complex subunit 7	Q7PR68	2.906e-26	77	120.553	119	92
THRIPS_11_08_2011_00998	wasf3_human ame: full=wiskott-aldrich syndrome protein family member 3 short=wasp family protein member 3 ame: full=protein wave-3 ame: full=verprolin homology domain-containing protein 3	1250	gi|59800455|sp|Q9UPY6.2|WASF3_HUMANRecName: Full=Wiskott-Aldrich syndrome protein family member 3; Short=WASP family protein member 3; AltName: Full=Protein WAVE-3; AltName: Full=Verprolin homology domain-containing protein 3	Q9UPY6	2.49879e-63	70	243.047	234	166
THRIPS_11_08_2011_01001	piwi_drome ame: full=protein piwi	1694	gi|33112431|sp|Q9VKM1.1|PIWI_DROMERecName: Full=Protein piwi	Q9VKM1	1.22038e-66	61	254.603	317	196
THRIPS_11_08_2011_01002	bcat1_rat ame: full=branched-chain-amino-acid cytosolic short=bcat	1465	gi|1705438|sp|P54690.1|BCAT1_RATRecName: Full=Branched-chain-amino-acid aminotransferase, cytosolic; Short=BCAT(c)	P54690	4.41601e-101	75	198.364	163	123
THRIPS_11_08_2011_01005	art2_yeast ame: full=uncharacterized protein art2 ame: full=antisense to ribosomal rna transcript protein 2	1054	gi|74630365|sp|Q8TGM7.1|ART2_YEASTRecName: Full=Uncharacterized protein ART2; AltName: Full=Antisense to ribosomal RNA transcript protein 2	Q8TGM7	6.87025e-24	89	111.694	57	51
THRIPS_11_08_2011_01007	dhsa_rat ame: full=succinate dehydrogenase flavoprotein mitochondrial ame: full=flavoprotein subunit of complex ii short=fp flags: precursor	3111	gi|52782765|sp|Q920L2.1|DHSA_RATRecName: Full=Succinate dehydrogenase [ubiquinone] flavoprotein subunit, mitochondrial; AltName: Full=Flavoprotein subunit of complex II; Short=Fp; Flags: Precursor	Q920L2	0	82	969.148	692	571
THRIPS_11_08_2011_01014	rm18_mouse ame: full=39s ribosomal protein mitochondrial short=l18mt short=mrp-l18 flags: precursor	239	gi|41017793|sp|Q9CQL5.1|RM18_MOUSERecName: Full=39S ribosomal protein L18, mitochondrial; Short=L18mt; Short=MRP-L18; Flags: Precursor	Q9CQL5	1.04916e-11	67	68.5514	73	49
THRIPS_11_08_2011_01020	nef attachable protein	244	gi|29027541|gb|AAO61995.1|nef attachable protein [Aster yellows phytoplasma]	AAO61995	1.7186e-17	76	92.4337	60	46
THRIPS_11_08_2011_01026	aldehyde dehydrogenase 16 member a1	317	gi|113931284|ref|NP_001039089.1|aldehyde dehydrogenase 16A1 [Xenopus (Silurana) tropicalis] >gi|89268096|emb|CAJ82492.1| aldehyde dehydrogenase 16 family, member A1 [Xenopus tropicalis]	NP_001039089	6.93294e-06	55	53.9138	93	52
THRIPS_11_08_2011_01028	rpb2_drome ame: full=dna-directed rna polymerase ii subunit rpb2 short=rna polymerase ii subunit 2 short=rna polymerase ii subunit b2 ame: full=dna-directed rna polymerase ii 140 kda polypeptide	230	gi|12644108|sp|P08266.2|RPB2_DROMERecName: Full=DNA-directed RNA polymerase II subunit RPB2; Short=RNA polymerase II subunit 2; Short=RNA polymerase II subunit B2; AltName: Full=DNA-directed RNA polymerase II 140 kDa polypeptide	P08266	5.21918e-35	96	145.976	76	73
THRIPS_11_08_2011_01032	anr28_mouse ame: full=serine threonine-protein phosphatase 6 regulatory ankyrin repeat subunit a short=pp6-ars-a short=serine threonine-protein phosphatase 6 regulatory subunit ars-a ame: full=ankyrin repeat domain-containing protein 28 ame: full=phosphatase interactor targeting protein hnrnp k short=pitk	325	gi|81908906|sp|Q505D1.1|ANR28_MOUSERecName: Full=Serine/threonine-protein phosphatase 6 regulatory ankyrin repeat subunit A; Short=PP6-ARS-A; Short=Serine/threonine-protein phosphatase 6 regulatory subunit ARS-A; AltName: Full=Ankyrin repeat domain-containing protein 28; AltName: Full=Phosphatase interactor targeting protein hnRNP K; Short=PITK	Q505D1	5.61021e-26	68	115.931	108	74
THRIPS_11_08_2011_01038	zrab2_chick ame: full=zinc finger ran-binding domain-containing protein 2	214	gi|75571429|sp|Q5ZLX5.1|ZRAB2_CHICKRecName: Full=Zinc finger Ran-binding domain-containing protein 2	Q5ZLX5	8.72193e-27	86	118.627	67	58
THRIPS_11_08_2011_01039	btkl_drome ame: full=tyrosine-protein kinase btk29a ame: full=dsrc28c ame: full=dsrc29a	211	gi|25453425|sp|P08630.2|BTKL_DROMERecName: Full=Tyrosine-protein kinase Btk29A; AltName: Full=Dsrc28C; AltName: Full=Dsrc29a	P08630	1.03583e-19	80	95.1301	66	53
THRIPS_11_08_2011_01045	odc_bovin ame: full=mitochondrial 2-oxodicarboxylate carrier ame: full=solute carrier family 25 member 21	211	gi|146325017|sp|A0JN87.1|ODC_BOVINRecName: Full=Mitochondrial 2-oxodicarboxylate carrier; AltName: Full=Solute carrier family 25 member 21	A0JN87	3.33215e-18	78	90.1225	70	55
THRIPS_11_08_2011_01048	pcna_pea ame: full=proliferating cell nuclear antigen	218	gi|50400709|sp|O82134.1|PCNA_PEARecName: Full=Proliferating cell nuclear antigen	O82134	8.17642e-09	63	58.9214	58	37
THRIPS_11_08_2011_01050	leng8_danre ame: full=leukocyte receptor cluster member 8 homolog	237	gi|158705862|sp|A4QNR8.1|LENG8_DANRERecName: Full=Leukocyte receptor cluster member 8 homolog	A4QNR8	1.00915e-30	88	131.724	77	68
THRIPS_11_08_2011_01064	spg7_mouse ame: full=paraplegin	279	gi|123784784|sp|Q3ULF4.1|SPG7_MOUSERecName: Full=Paraplegin	Q3ULF4	1.44976e-21	70	101.293	92	65
THRIPS_11_08_2011_01065	ncoa7_human ame: full=nuclear receptor coactivator 7 ame: full=140 kda estrogen receptor-associated protein ame: full=estrogen nuclear receptor coactivator 1	6663	gi|110287684|sp|Q8NI08.2|NCOA7_HUMANRecName: Full=Nuclear receptor coactivator 7; AltName: Full=140 kDa estrogen receptor-associated protein; AltName: Full=Estrogen nuclear receptor coactivator 1	Q8NI08	7.06486e-13	58	78.1814	94	55
THRIPS_11_08_2011_01066	tret1_aedae ame: full=facilitated trehalose transporter tret1	268	gi|122069442|sp|Q17NV8.1|TRET1_AEDAERecName: Full=Facilitated trehalose transporter Tret1	Q17NV8	1.15825e-34	84	144.821	89	75
THRIPS_11_08_2011_01068	nade1_drome ame: full=probable glutamine-dependent nad(+) synthetase ame: full=nad(+) synthase	311	gi|8928236|sp|Q9VYA0.1|NADE1_DROMERecName: Full=Probable glutamine-dependent NAD(+) synthetase; AltName: Full=NAD(+) synthase [glutamine-hydrolyzing]	Q9VYA0	6.95851e-32	86	135.576	103	89
THRIPS_11_08_2011_01070	rhol_drome ame: full=ras-like gtp-binding protein flags: precursor	876	gi|2500184|sp|Q24192.1|RHOL_DROMERecName: Full=Ras-like GTP-binding protein RhoL; Flags: Precursor	Q24192	1.23629e-49	80	196.823	150	120
THRIPS_11_08_2011_01072	ttc27_chick ame: full=tetratricopeptide repeat protein 27 short=tpr repeat protein 27	303	gi|82231190|sp|Q5F3K0.1|TTC27_CHICKRecName: Full=Tetratricopeptide repeat protein 27; Short=TPR repeat protein 27	Q5F3K0	2.43247e-08	58	57.3806	99	58
THRIPS_11_08_2011_01075	leucine-rich and death domain containing-like	323	gi|260817415|ref|XP_002603582.1|hypothetical protein BRAFLDRAFT_93124 [Branchiostoma floridae] >gi|229288902|gb|EEN59593.1| hypothetical protein BRAFLDRAFT_93124 [Branchiostoma floridae]	XP_002603582	2.13418e-15	72	85.5001	68	49
THRIPS_11_08_2011_01077	kynurenine alpha-aminoadipate aminotransferase mitochondrial	375	gi|307170804|gb|EFN62920.1|Kynurenine/alpha-aminoadipate aminotransferase mitochondrial [Camponotus floridanus]	EFN62920	2.37161e-06	71	55.4546	45	32
THRIPS_11_08_2011_01082	nup50_human ame: full=nuclear pore complex protein nup50 ame: full=50 kda nucleoporin ame: full=nuclear pore-associated protein 60 kda-like ame: full=nucleoporin nup50	290	gi|20455193|sp|Q9UKX7.2|NUP50_HUMANRecName: Full=Nuclear pore complex protein Nup50; AltName: Full=50 kDa nucleoporin; AltName: Full=Nuclear pore-associated protein 60 kDa-like; AltName: Full=Nucleoporin Nup50	Q9UKX7	4.33263e-10	70	63.1586	85	60
THRIPS_11_08_2011_01083	hypothetical protein Eint_030420 [Encephalitozoon intestinalis ATCC 50506]	291	gi|303388625|ref|XP_003072546.1|hypothetical protein Eint_030420 [Encephalitozoon intestinalis ATCC 50506] >gi|303301687|gb|ADM11186.1| hypothetical protein Eint_030420 [Encephalitozoon intestinalis ATCC 50506]	XP_003072546	1.69171e-28	82	129.028	96	79
THRIPS_11_08_2011_01091	tbc25_human ame: full=tbc1 domain family member 25	312	gi|296452922|sp|Q3MII6.2|TBC25_HUMANRecName: Full=TBC1 domain family member 25	Q3MII6	2.65037e-23	82	107.071	79	65
THRIPS_11_08_2011_01093	rab5c_chick ame: full=ras-related protein rab-5c ame: full=rab5c-like protein	242	gi|82246551|sp|Q98932.1|RAB5C_CHICKRecName: Full=Ras-related protein Rab-5C; AltName: Full=Rab5C-like protein	Q98932	1.11486e-21	85	101.679	71	61
THRIPS_11_08_2011_01094	nadh-ubiquinone oxidoreductase subunit	384	gi|307204005|gb|EFN82909.1|NADH dehydrogenase [ubiquinone] 1 alpha subcomplex subunit 12 [Harpegnathos saltator]	EFN82909	9.78305e-13	76	76.6406	55	42
THRIPS_11_08_2011_01098	at8b4_human ame: full=probable phospholipid-transporting atpase im ame: full=atpase class i type 8b member 4	534	gi|209572761|sp|Q8TF62.3|AT8B4_HUMANRecName: Full=Probable phospholipid-transporting ATPase IM; AltName: Full=ATPase class I type 8B member 4	Q8TF62	9.75513e-49	81	116.701	92	75
THRIPS_11_08_2011_01101	catl1_chick ame: full=cathepsin l1 contains: ame: full=cathepsin l1 heavy chain contains: ame: full=cathepsin l1 light chain	520	gi|21617827|sp|P09648.1|CATL1_CHICKRecName: Full=Cathepsin L1; Contains: RecName: Full=Cathepsin L1 heavy chain; Contains: RecName: Full=Cathepsin L1 light chain	P09648	8.11479e-63	77	239.195	169	131
THRIPS_11_08_2011_01102	mfap1_bovin ame: full=microfibrillar-associated protein 1	260	gi|75057927|sp|Q5EA98.1|MFAP1_BOVINRecName: Full=Microfibrillar-associated protein 1	Q5EA98	3.52728e-12	79	70.0922	49	39
THRIPS_11_08_2011_01104	xdh_drosu ame: full=xanthine dehydrogenase short=xd ame: full=protein rosy locus	250	gi|2493964|sp|P91711.1|XDH_DROSURecName: Full=Xanthine dehydrogenase; Short=XD; AltName: Full=Protein rosy locus	P91711	8.7987e-11	62	65.4698	75	47
THRIPS_11_08_2011_01107	sdk_drome ame: full=protein sidekick flags: precursor	316	gi|90183176|sp|O97394.2|SDK_DROMERecName: Full=Protein sidekick; Flags: Precursor	O97394	1.10096e-37	83	154.836	105	88
THRIPS_11_08_2011_01108	yme1_caeel ame: full=atp-dependent zinc metalloprotease yme1 homolog	251	gi|306526251|sp|P54813.2|YME1_CAEELRecName: Full=ATP-dependent zinc metalloprotease YME1 homolog	P54813	7.89634e-28	86	122.094	82	71
THRIPS_11_08_2011_01109	endou_drome ame: full=poly -specific endoribonuclease homolog ame: full=protein endou ame: full=uridylate-specific endoribonuclease homolog flags: precursor	5924	gi|74871800|sp|Q9VZ49.1|ENDOU_DROMERecName: Full=Poly(U)-specific endoribonuclease homolog; AltName: Full=Protein endoU; AltName: Full=Uridylate-specific endoribonuclease homolog; Flags: Precursor	Q9VZ49	7.8116e-56	66	220.705	266	177
THRIPS_11_08_2011_01120	ipo7_mouse ame: full=importin-7 short=imp7 ame: full=ran-binding protein 7 short= 7	4289	gi|45476977|sp|Q9EPL8.2|IPO7_MOUSERecName: Full=Importin-7; Short=Imp7; AltName: Full=Ran-binding protein 7; Short=RanBP7	Q9EPL8	0	73	1170.61	1077	792
THRIPS_11_08_2011_01121	ipo7_mouse ame: full=importin-7 short=imp7 ame: full=ran-binding protein 7 short= 7	5139	gi|45476977|sp|Q9EPL8.2|IPO7_MOUSERecName: Full=Importin-7; Short=Imp7; AltName: Full=Ran-binding protein 7; Short=RanBP7	Q9EPL8	0	73	1170.61	1077	792
THRIPS_11_08_2011_01122	awa1_yeast ame: full=cell wall protein awa1 flags: precursor	1813	gi|74697748|sp|Q8TGE1.1|AWA1_YEASTRecName: Full=Cell wall protein AWA1; Flags: Precursor	Q8TGE1	1.18494e-06	63	55.4546	66	42
THRIPS_11_08_2011_01123	PREDICTED: hypothetical protein [Danio rerio]	2138	gi|292610391|ref|XP_002660725.1|PREDICTED: hypothetical protein [Danio rerio]	XP_002660725	2.12599e-06	45	59.3066	146	67
THRIPS_11_08_2011_01126	venom carbohydrate-rich protein	1056	gi|156547558|ref|XP_001602538.1|PREDICTED: similar to venom carbohydrate-rich protein [Nasonia vitripennis]	XP_001602538	6.74712e-09	47	66.2402	167	80
THRIPS_11_08_2011_01127	venom carbohydrate-rich protein	1760	gi|156547558|ref|XP_001602538.1|PREDICTED: similar to venom carbohydrate-rich protein [Nasonia vitripennis]	XP_001602538	1.37202e-08	47	66.2402	167	80
THRIPS_11_08_2011_01129	renr_bovin ame: full=renin receptor ame: full=atpase h(+)-transporting lysosomal accessory protein 2 ame: full=atpase h(+)-transporting lysosomal-interacting protein 2 ame: full=renin prorenin receptor ame: full=vacuolar atp synthase membrane sector-associated protein m8-9 short=v-atpase subunit flags: precursor	1067	gi|223590139|sp|P81134.2|RENR_BOVINRecName: Full=Renin receptor; AltName: Full=ATPase H(+)-transporting lysosomal accessory protein 2; AltName: Full=ATPase H(+)-transporting lysosomal-interacting protein 2; AltName: Full=Renin/prorenin receptor; AltName: Full=Vacuolar ATP synthase membrane sector-associated protein M8-9; Short=V-ATPase M8.9 subunit; Flags: Precursor	P81134	6.96067e-24	45	111.694	333	153
THRIPS_11_08_2011_01130	renr_bovin ame: full=renin receptor ame: full=atpase h(+)-transporting lysosomal accessory protein 2 ame: full=atpase h(+)-transporting lysosomal-interacting protein 2 ame: full=renin prorenin receptor ame: full=vacuolar atp synthase membrane sector-associated protein m8-9 short=v-atpase subunit flags: precursor	1795	gi|223590139|sp|P81134.2|RENR_BOVINRecName: Full=Renin receptor; AltName: Full=ATPase H(+)-transporting lysosomal accessory protein 2; AltName: Full=ATPase H(+)-transporting lysosomal-interacting protein 2; AltName: Full=Renin/prorenin receptor; AltName: Full=Vacuolar ATP synthase membrane sector-associated protein M8-9; Short=V-ATPase M8.9 subunit; Flags: Precursor	P81134	1.3759e-23	45	111.694	333	153
THRIPS_11_08_2011_01131	renr_bovin ame: full=renin receptor ame: full=atpase h(+)-transporting lysosomal accessory protein 2 ame: full=atpase h(+)-transporting lysosomal-interacting protein 2 ame: full=renin prorenin receptor ame: full=vacuolar atp synthase membrane sector-associated protein m8-9 short=v-atpase subunit flags: precursor	1066	gi|223590139|sp|P81134.2|RENR_BOVINRecName: Full=Renin receptor; AltName: Full=ATPase H(+)-transporting lysosomal accessory protein 2; AltName: Full=ATPase H(+)-transporting lysosomal-interacting protein 2; AltName: Full=Renin/prorenin receptor; AltName: Full=Vacuolar ATP synthase membrane sector-associated protein M8-9; Short=V-ATPase M8.9 subunit; Flags: Precursor	P81134	9.13319e-08	69	58.151	52	36
THRIPS_11_08_2011_01134	keap1_mouse ame: full=kelch-like ech-associated protein 1 ame: full=cytosolic inhibitor of nrf2 short=inrf2	1085	gi|13431664|sp|Q9Z2X8.1|KEAP1_MOUSERecName: Full=Kelch-like ECH-associated protein 1; AltName: Full=Cytosolic inhibitor of Nrf2; Short=INrf2	Q9Z2X8	2.81301e-12	61	73.1738	70	43
THRIPS_11_08_2011_01135	keap1_pig ame: full=kelch-like ech-associated protein 1 ame: full=cytosolic inhibitor of nrf2 short=inrf2	2526	gi|75055487|sp|Q684M4.1|KEAP1_PIGRecName: Full=Kelch-like ECH-associated protein 1; AltName: Full=Cytosolic inhibitor of Nrf2; Short=INrf2	Q684M4	1.111e-170	68	600.897	569	389
THRIPS_11_08_2011_01136	spt6h_drome ame: full=transcription elongation factor spt6	5519	gi|74872611|sp|Q9W420.1|SPT6H_DROMERecName: Full=Transcription elongation factor SPT6	Q9W420	0	70	1612.82	1567	1106
THRIPS_11_08_2011_01137	spt6h_drome ame: full=transcription elongation factor spt6	2620	gi|74872611|sp|Q9W420.1|SPT6H_DROMERecName: Full=Transcription elongation factor SPT6	Q9W420	0	65	365.155	451	296
THRIPS_11_08_2011_01143	perc_drome ame: full=chorion peroxidase ame: full=peroxinectin-related protein short=dpxt contains: ame: full=chorion peroxidase light chain contains: ame: full=chorion peroxidase heavy chain flags: precursor	3030	gi|229462993|sp|Q9VEG6.3|PERC_DROMERecName: Full=Chorion peroxidase; AltName: Full=Peroxinectin-related protein; Short=Dpxt; Contains: RecName: Full=Chorion peroxidase light chain; Contains: RecName: Full=Chorion peroxidase heavy chain; Flags: Precursor	Q9VEG6	6.08415e-65	46	147.902	396	184
THRIPS_11_08_2011_01144	pero_drome ame: full=peroxidase short= ame: full=chorion peroxidase flags: precursor	2945	gi|290457651|sp|Q01603.2|PERO_DROMERecName: Full=Peroxidase; Short=DmPO; AltName: Full=Chorion peroxidase; Flags: Precursor	Q01603	2.64528e-78	50	294.278	598	301
THRIPS_11_08_2011_01145	ubiqp_strpu ame: full=polyubiquitin contains: ame: full=ubiquitin flags: precursor	544	gi|302393788|sp|P23398.2|UBIQP_STRPURecName: Full=Polyubiquitin; Contains: RecName: Full=Ubiquitin; Flags: Precursor	P23398	3.24964e-44	100	177.563	90	90
THRIPS_11_08_2011_01146	hypothetical protein [Curvibacter putative symbiont of Hydra magnipapillata]	411	gi|260222400|emb|CBA31926.1|hypothetical protein [Curvibacter putative symbiont of Hydra magnipapillata]	CBA31926	6.79681e-43	81	114.775	93	76
THRIPS_11_08_2011_01147	hypothetical protein SCH_0249 [Salmonella enterica subsp. enterica serovar Choleraesuis str. SC-B67]	230	gi|62126452|gb|AAX64155.1|hypothetical protein SCH_0249 [Salmonella enterica subsp. enterica serovar Choleraesuis str. SC-B67]	AAX64155	2.28859e-09	60	65.4698	71	43
THRIPS_11_08_2011_01151	fur1c_drome ame: full=furin-like protease isoform 1-crr short=furin-1 ame: full=kex2-like endoprotease 1 ame: full=dklip-1 flags: precursor	2335	gi|20141079|sp|P30430.2|FUR1C_DROMERecName: Full=Furin-like protease 1, isoform 1-CRR; Short=Furin-1; AltName: Full=Kex2-like endoprotease 1; AltName: Full=dKLIP-1; Flags: Precursor	P30430	0	84	644.425	430	364
THRIPS_11_08_2011_01152	fur1c_drome ame: full=furin-like protease isoform 1-crr short=furin-1 ame: full=kex2-like endoprotease 1 ame: full=dklip-1 flags: precursor	2962	gi|20141079|sp|P30430.2|FUR1C_DROMERecName: Full=Furin-like protease 1, isoform 1-CRR; Short=Furin-1; AltName: Full=Kex2-like endoprotease 1; AltName: Full=dKLIP-1; Flags: Precursor	P30430	0	84	644.425	430	364
THRIPS_11_08_2011_01153	fur1c_drome ame: full=furin-like protease isoform 1-crr short=furin-1 ame: full=kex2-like endoprotease 1 ame: full=dklip-1 flags: precursor	5214	gi|20141079|sp|P30430.2|FUR1C_DROMERecName: Full=Furin-like protease 1, isoform 1-CRR; Short=Furin-1; AltName: Full=Kex2-like endoprotease 1; AltName: Full=dKLIP-1; Flags: Precursor	P30430	0	77	647.506	493	384
THRIPS_11_08_2011_01154	fur1c_drome ame: full=furin-like protease isoform 1-crr short=furin-1 ame: full=kex2-like endoprotease 1 ame: full=dklip-1 flags: precursor	3961	gi|20141079|sp|P30430.2|FUR1C_DROMERecName: Full=Furin-like protease 1, isoform 1-CRR; Short=Furin-1; AltName: Full=Kex2-like endoprotease 1; AltName: Full=dKLIP-1; Flags: Precursor	P30430	0	75	647.121	506	384
THRIPS_11_08_2011_01158	vit_antgr ame: full=vitellogenin contains: ame: full=yp47 contains: ame: full=yp160 flags: precursor	1021	gi|3123007|sp|Q05808.1|VIT_ANTGRRecName: Full=Vitellogenin; Contains: RecName: Full=YP47; Contains: RecName: Full=YP160; Flags: Precursor	Q05808	2.56218e-36	53	152.91	337	179
THRIPS_11_08_2011_01164	kalrn_human ame: full=kalirin ame: full=huntingtin-associated protein-interacting protein ame: full=protein duo ame: full=serine threonine-protein kinase with dbl- and pleckstrin homology domain	3894	gi|160380714|sp|O60229.2|KALRN_HUMANRecName: Full=Kalirin; AltName: Full=Huntingtin-associated protein-interacting protein; AltName: Full=Protein Duo; AltName: Full=Serine/threonine-protein kinase with Dbl- and pleckstrin homology domain	O60229	6.59255e-149	51	529.25	1119	575
THRIPS_11_08_2011_01165	kalrn_human ame: full=kalirin ame: full=huntingtin-associated protein-interacting protein ame: full=protein duo ame: full=serine threonine-protein kinase with dbl- and pleckstrin homology domain	3583	gi|160380714|sp|O60229.2|KALRN_HUMANRecName: Full=Kalirin; AltName: Full=Huntingtin-associated protein-interacting protein; AltName: Full=Protein Duo; AltName: Full=Serine/threonine-protein kinase with Dbl- and pleckstrin homology domain	O60229	1.07391e-121	50	438.728	1007	505
THRIPS_11_08_2011_01166	ddx6l_human ame: full=probable atp-dependent rna helicase ddx60-like ame: full=dead box protein 60-like	5455	gi|74755482|sp|Q5H9U9.1|DDX6L_HUMANRecName: Full=Probable ATP-dependent RNA helicase DDX60-like; AltName: Full=DEAD box protein 60-like	Q5H9U9	9.27469e-96	45	353.214	1152	528
THRIPS_11_08_2011_01167	s2611_human ame: full=sodium-independent sulfate anion transporter ame: full=solute carrier family 26 member 11	4190	gi|182705284|sp|Q86WA9.2|S2611_HUMANRecName: Full=Sodium-independent sulfate anion transporter; AltName: Full=Solute carrier family 26 member 11	Q86WA9	1.02367e-62	61	243.047	351	215
THRIPS_11_08_2011_01168	s2611_mouse ame: full=sodium-independent sulfate anion transporter ame: full=solute carrier family 26 member 11	5679	gi|190360177|sp|Q80ZD3.2|S2611_MOUSERecName: Full=Sodium-independent sulfate anion transporter; AltName: Full=Solute carrier family 26 member 11	Q80ZD3	4.77158e-119	63	430.639	565	359
THRIPS_11_08_2011_01171	brox_human ame: full=bro1 domain-containing protein brox flags: precursor	241	gi|74747339|sp|Q5VW32.1|BROX_HUMANRecName: Full=BRO1 domain-containing protein BROX; Flags: Precursor	Q5VW32	5.04334e-06	60	49.6766	75	45
THRIPS_11_08_2011_01174	atp6_locmi ame: full=atp synthase subunit a ame: full=f-atpase protein 6	2537	gi|114444|sp|P14569.1|ATP6_LOCMIRecName: Full=ATP synthase subunit a; AltName: Full=F-ATPase protein 6	P14569	5.96853e-31	66	136.732	185	123
THRIPS_11_08_2011_01176	eif3d_bommo ame: full=eukaryotic translation initiation factor 3 subunit d short=eif3d ame: full=eukaryotic translation initiation factor 3 subunit 7	2179	gi|122104174|sp|Q0ZB77.1|EIF3D_BOMMORecName: Full=Eukaryotic translation initiation factor 3 subunit D; Short=eIF3d; AltName: Full=Eukaryotic translation initiation factor 3 subunit 7	Q0ZB77	6.12578e-138	87	491.886	307	269
THRIPS_11_08_2011_01177	eif3d_culqu ame: full=eukaryotic translation initiation factor 3 subunit d short=eif3d ame: full=eukaryotic translation initiation factor 3 subunit 7	2062	gi|223635156|sp|B0X6P7.1|EIF3D_CULQURecName: Full=Eukaryotic translation initiation factor 3 subunit D; Short=eIF3d; AltName: Full=Eukaryotic translation initiation factor 3 subunit 7	B0X6P7	0	85	821.617	527	448
THRIPS_11_08_2011_01178	eif3d_anoga ame: full=eukaryotic translation initiation factor 3 subunit d short=eif3d ame: full=eukaryotic translation initiation factor 3 subunit 7	1995	gi|223635154|sp|Q7QBW3.3|EIF3D_ANOGARecName: Full=Eukaryotic translation initiation factor 3 subunit D; Short=eIF3d; AltName: Full=Eukaryotic translation initiation factor 3 subunit 7	Q7QBW3	0	81	822.772	579	471
THRIPS_11_08_2011_01182	cbpd_drome ame: full=carboxypeptidase d ame: full=metallocarboxypeptidase d ame: full=protein silver flags: precursor	1460	gi|13124695|sp|P42787.2|CBPD_DROMERecName: Full=Carboxypeptidase D; AltName: Full=Metallocarboxypeptidase D; AltName: Full=Protein silver; Flags: Precursor	P42787	6.3069e-109	69	394.815	408	282
THRIPS_11_08_2011_01183	cbpd_drome ame: full=carboxypeptidase d ame: full=metallocarboxypeptidase d ame: full=protein silver flags: precursor	2479	gi|13124695|sp|P42787.2|CBPD_DROMERecName: Full=Carboxypeptidase D; AltName: Full=Metallocarboxypeptidase D; AltName: Full=Protein silver; Flags: Precursor	P42787	0	70	454.521	391	274
THRIPS_11_08_2011_01184	protein	1573	gi|147826550|emb|CAN70790.1|hypothetical protein [Vitis vinifera]	CAN70790	2.44916e-38	98	164.851	85	84
THRIPS_11_08_2011_01186	ymd2_caeel ame: full=uncharacterized protein	2308	gi|465916|sp|P34456.1|YMD2_CAEELRecName: Full=Uncharacterized protein F54H12.2	P34456	2.7572e-27	45	124.405	393	179
THRIPS_11_08_2011_01191	cpr1_drome ame: full= cysteine proteinase cg12163 flags: precursor	3952	gi|32699625|sp|Q9VN93.2|CPR1_DROMERecName: Full=Putative cysteine proteinase CG12163; Flags: Precursor	Q9VN93	3.60535e-102	55	374.015	551	305
THRIPS_11_08_2011_01192	cpr1_drome ame: full= cysteine proteinase cg12163 flags: precursor	4558	gi|32699625|sp|Q9VN93.2|CPR1_DROMERecName: Full=Putative cysteine proteinase CG12163; Flags: Precursor	Q9VN93	7.91695e-101	55	369.777	551	304
THRIPS_11_08_2011_01203	znfx1_human ame: full=nfx1-type zinc finger-containing protein 1	2451	gi|23821814|sp|Q9P2E3.2|ZNFX1_HUMANRecName: Full=NFX1-type zinc finger-containing protein 1	Q9P2E3	1.90687e-26	43	121.709	373	162
THRIPS_11_08_2011_01204	mmsa_anoga ame: full=probable methylmalonate-semialdehyde dehydrogenase flags: precursor	2469	gi|74803744|sp|Q7QC84.2|MMSA_ANOGARecName: Full=Probable methylmalonate-semialdehyde dehydrogenase [acylating], mitochondrial; Short=MMSDH; Short=Malonate-semialdehyde dehydrogenase [acylating]; Flags: Precursor	Q7QC84	0	85	783.867	505	432
THRIPS_11_08_2011_01205	p5cr2_bovin ame: full=pyrroline-5-carboxylate reductase 2 short=p5c reductase 2 short=p5cr 2	893	gi|122064648|sp|Q17QJ7.1|P5CR2_BOVINRecName: Full=Pyrroline-5-carboxylate reductase 2; Short=P5C reductase 2; Short=P5CR 2	Q17QJ7	3.5773e-36	67	152.14	156	106
THRIPS_11_08_2011_01214	pol3_drome ame: full=retrovirus-related pol polyprotein from transposon includes: ame: full=protease includes: ame: full=reverse transcriptase includes: ame: full=endonuclease	235	gi|130405|sp|P04323.1|POL3_DROMERecName: Full=Retrovirus-related Pol polyprotein from transposon 17.6; Includes: RecName: Full=Protease; Includes: RecName: Full=Reverse transcriptase; Includes: RecName: Full=Endonuclease	P04323	4.13857e-08	61	56.6102	70	43
THRIPS_11_08_2011_01215	dldh_human ame: full=dihydrolipoyl mitochondrial ame: full=dihydrolipoamide dehydrogenase ame: full=glycine cleavage system l protein flags: precursor	2217	gi|269849557|sp|P09622.2|DLDH_HUMANRecName: Full=Dihydrolipoyl dehydrogenase, mitochondrial; AltName: Full=Dihydrolipoamide dehydrogenase; AltName: Full=Glycine cleavage system L protein; Flags: Precursor	P09622	0	83	754.207	506	425
THRIPS_11_08_2011_01216	dldh_human ame: full=dihydrolipoyl mitochondrial ame: full=dihydrolipoamide dehydrogenase ame: full=glycine cleavage system l protein flags: precursor	2444	gi|269849557|sp|P09622.2|DLDH_HUMANRecName: Full=Dihydrolipoyl dehydrogenase, mitochondrial; AltName: Full=Dihydrolipoamide dehydrogenase; AltName: Full=Glycine cleavage system L protein; Flags: Precursor	P09622	0	87	566.614	359	314
THRIPS_11_08_2011_01218	wnk3_human ame: full=serine threonine-protein kinase wnk3 ame: full=protein kinase lysine-deficient 3 ame: full=protein kinase with no lysine 3	2571	gi|41688792|sp|Q9BYP7.2|WNK3_HUMANRecName: Full=Serine/threonine-protein kinase WNK3; AltName: Full=Protein kinase lysine-deficient 3; AltName: Full=Protein kinase with no lysine 3	Q9BYP7	5.16567e-06	48	53.9138	107	52
THRIPS_11_08_2011_01225	myo9a_rat ame: full=myosin-ixa ame: full=myr 7 ame: full=unconventional myosin-9a	2576	gi|81872884|sp|Q9Z1N3.1|MYO9A_RATRecName: Full=Myosin-IXa; AltName: Full=Myr 7; AltName: Full=Unconventional myosin-9a	Q9Z1N3	0	71	708.368	695	498
THRIPS_11_08_2011_01227	ank2_human ame: full=ankyrin-2 short=ank-2 ame: full=ankyrin-b ame: full=brain ankyrin ame: full=non-erythroid ankyrin	1937	gi|215274185|sp|Q01484.3|ANK2_HUMANRecName: Full=Ankyrin-2; Short=ANK-2; AltName: Full=Ankyrin-B; AltName: Full=Brain ankyrin; AltName: Full=Non-erythroid ankyrin	Q01484	2.34426e-101	71	370.163	337	242
THRIPS_11_08_2011_01228	s35c2_mouse ame: full=solute carrier family 35 member c2 ame: full=ovarian cancer-overexpressed gene 1 protein	2959	gi|41017496|sp|Q8VCX2.1|S35C2_MOUSERecName: Full=Solute carrier family 35 member C2; AltName: Full=Ovarian cancer-overexpressed gene 1 protein	Q8VCX2	7.81374e-46	67	186.422	286	193
THRIPS_11_08_2011_01229	rl39_pluxy ame: full=60s ribosomal protein l39	1017	gi|54036254|sp|Q6F482.1|RL39_PLUXYRecName: Full=60S ribosomal protein L39 >gi|54036316|sp|Q962S4.1|RL39_SPOFR RecName: Full=60S ribosomal protein L39	Q6F482	1.50577e-12	96	73.9442	51	49
THRIPS_11_08_2011_01232	rala_drome ame: full=ras-related protein ral-a flags: precursor	2999	gi|6093893|sp|P48555.2|RALA_DROMERecName: Full=Ras-related protein Ral-a; Flags: Precursor	P48555	1.92107e-84	89	314.694	199	179
THRIPS_11_08_2011_01233	mys9_drome ame: full=myosin heavy chain 95f ame: full=95f mhc ame: full=protein jaguar	4633	gi|51338797|sp|Q01989.3|MYS9_DROMERecName: Full=Myosin heavy chain 95F; AltName: Full=95F MHC; AltName: Full=Protein jaguar	Q01989	0	75	1393.64	1255	946
THRIPS_11_08_2011_01234	spsb1_bovin ame: full=spry domain-containing socs box protein 1 short=ssb-1	2811	gi|75057858|sp|Q5E9X6.1|SPSB1_BOVINRecName: Full=SPRY domain-containing SOCS box protein 1; Short=SSB-1	Q5E9X6	2.48291e-110	81	400.593	276	226
THRIPS_11_08_2011_01235	c43bp_crigr ame: full=collagen type iv alpha-3-binding protein ame: full=ceramide transfer protein	3809	gi|81893090|sp|Q6VVX2.1|C43BP_CRIGRRecName: Full=Collagen type IV alpha-3-binding protein; AltName: Full=Ceramide transfer protein	Q6VVX2	4.20137e-140	64	499.975	594	383
THRIPS_11_08_2011_01241	rhg21_xentr ame: full=rho gtpase-activating protein 21 ame: full=rho-type gtpase-activating protein 21	5076	gi|158706194|sp|A2RUV4.1|RHG21_XENTRRecName: Full=Rho GTPase-activating protein 21; AltName: Full=Rho-type GTPase-activating protein 21	A2RUV4	1.69333e-51	62	206.068	251	157
THRIPS_11_08_2011_01243	26s proteasome regulatory complex protein	212	gi|303390942|ref|XP_003073701.1|26S proteasome regulatory complex protein [Encephalitozoon intestinalis ATCC 50506] >gi|303302849|gb|ADM12341.1| 26S proteasome regulatory complex protein [Encephalitozoon intestinalis ATCC 50506]	XP_003073701	2.10327e-07	68	58.9214	57	39
THRIPS_11_08_2011_01244	ddx17_mouse ame: full=probable atp-dependent rna helicase ddx17 ame: full=dead box protein 17	5376	gi|76364169|sp|Q501J6.1|DDX17_MOUSERecName: Full=Probable ATP-dependent RNA helicase DDX17; AltName: Full=DEAD box protein 17	Q501J6	1.86363e-165	79	584.719	462	369
THRIPS_11_08_2011_01245	ddx17_mouse ame: full=probable atp-dependent rna helicase ddx17 ame: full=dead box protein 17	5311	gi|76364169|sp|Q501J6.1|DDX17_MOUSERecName: Full=Probable ATP-dependent RNA helicase DDX17; AltName: Full=DEAD box protein 17	Q501J6	1.83893e-165	79	584.719	462	369
THRIPS_11_08_2011_01246	trm44_mouse ame: full=probable trna (uracil-o -)-methyltransferase	394	gi|81904889|sp|Q9D2Q2.1|TRM44_MOUSERecName: Full=Probable tRNA (uracil-O(2)-)-methyltransferase	Q9D2Q2	1.28048e-17	59	88.1965	106	63
THRIPS_11_08_2011_01249	s41a1_ponab ame: full=solute carrier family 41 member 1	3670	gi|75041503|sp|Q5R839.1|S41A1_PONABRecName: Full=Solute carrier family 41 member 1 >gi|152112285|sp|Q8IVJ1.2|S41A1_HUMAN RecName: Full=Solute carrier family 41 member 1	Q5R839	8.42674e-130	66	465.692	502	334
THRIPS_11_08_2011_01250	lypl1_ponab ame: full=lysophospholipase-like protein 1	288	gi|75070628|sp|Q5R8C2.3|LYPL1_PONABRecName: Full=Lysophospholipase-like protein 1	Q5R8C2	1.64797e-17	72	87.8113	94	68
THRIPS_11_08_2011_01253	sahh3_mouse ame: full= adenosylhomocysteinase 3 short= cyase 3 ame: full=s-adenosyl-l-homocysteine hydrolase 3 ame: full=s-adenosylhomocysteine hydrolase-like protein 2	4765	gi|81890771|sp|Q68FL4.1|SAHH3_MOUSERecName: Full=Putative adenosylhomocysteinase 3; Short=AdoHcyase 3; AltName: Full=S-adenosyl-L-homocysteine hydrolase 3; AltName: Full=S-adenosylhomocysteine hydrolase-like protein 2	Q68FL4	0	91	780.785	445	407
THRIPS_11_08_2011_01255	lipe_mouse ame: full=endothelial lipase ame: full=endothelial cell-derived lipase short=edl flags: precursor	1267	gi|22001807|sp|Q9WVG5.2|LIPE_MOUSERecName: Full=Endothelial lipase; AltName: Full=Endothelial cell-derived lipase; Short=EDL; Flags: Precursor	Q9WVG5	2.31953e-32	50	140.198	280	141
THRIPS_11_08_2011_01256	k1370_xentr ame: full=uncharacterized protein kiaa1370 homolog	4244	gi|82179050|sp|Q5FW46.1|K1370_XENTRRecName: Full=Uncharacterized protein KIAA1370 homolog	Q5FW46	1.60174e-63	58	245.743	301	177
THRIPS_11_08_2011_01257	rent1_human ame: full=regulator of nonsense transcripts 1 ame: full=atp-dependent helicase rent1 ame: full=nonsense mrna reducing factor 1 short=norf1 ame: full=up-frameshift suppressor 1 homolog short=hupf1	5446	gi|17380291|sp|Q92900.2|RENT1_HUMANRecName: Full=Regulator of nonsense transcripts 1; AltName: Full=ATP-dependent helicase RENT1; AltName: Full=Nonsense mRNA reducing factor 1; Short=NORF1; AltName: Full=Up-frameshift suppressor 1 homolog; Short=hUpf1	Q92900	0	79	1566.98	1164	924
THRIPS_11_08_2011_01259	dicer_xentr ame: full=endoribonuclease dicer	1205	gi|238064965|sp|B3DLA6.2|DICER_XENTRRecName: Full=Endoribonuclease Dicer	B3DLA6	2.25179e-13	46	77.0258	187	87
THRIPS_11_08_2011_01264	ak1cd_mouse ame: full=aldo-keto reductase family 1 member c13	275	gi|27805400|sp|Q8VC28.2|AK1CD_MOUSERecName: Full=Aldo-keto reductase family 1 member C13	Q8VC28	8.87308e-11	57	65.4698	90	52
THRIPS_11_08_2011_01267	itfg2_mouse ame: full=integrin-alpha fg-gap repeat-containing protein 2	1623	gi|81902347|sp|Q91WI7.1|ITFG2_MOUSERecName: Full=Integrin-alpha FG-GAP repeat-containing protein 2	Q91WI7	1.51348e-74	56	280.796	408	230
THRIPS_11_08_2011_01268	GJ10761 [Drosophila virilis]	590	gi|195394975|ref|XP_002056112.1|GJ10761 [Drosophila virilis] >gi|194142821|gb|EDW59224.1| GJ10761 [Drosophila virilis]	XP_002056112	8.45582e-06	47	54.299	115	55
THRIPS_11_08_2011_01270	k1267_human ame: full=mll1 mll complex subunit kiaa1267	1466	gi|74713349|sp|Q7Z3B3.1|K1267_HUMANRecName: Full=MLL1/MLL complex subunit KIAA1267	Q7Z3B3	1.54156e-14	48	81.2629	210	101
THRIPS_11_08_2011_01273	mib_drome ame: full=e3 ubiquitin-protein ligase mind-bomb ame: full=mind bomb homolog short=d-mib	1774	gi|68565370|sp|Q9VUX2.3|MIB_DROMERecName: Full=E3 ubiquitin-protein ligase mind-bomb; AltName: Full=Mind bomb homolog; Short=D-mib	Q9VUX2	0	84	940.643	610	518
THRIPS_11_08_2011_01276	poly	207	gi|292610665|ref|XP_002660852.1|PREDICTED: polyprotein-like [Danio rerio]	XP_002660852	1.2343e-15	76	86.2705	69	53
THRIPS_11_08_2011_01281	iqec1_human ame: full=iq motif and sec7 domain-containing protein 1 ame: full=adp-ribosylation factors guanine nucleotide-exchange protein 100 ame: full=adp-ribosylation factors guanine nucleotide-exchange protein 2 ame: full=brefeldin-resistant arf-gef 2 protein	3391	gi|74748429|sp|Q6DN90.1|IQEC1_HUMANRecName: Full=IQ motif and SEC7 domain-containing protein 1; AltName: Full=ADP-ribosylation factors guanine nucleotide-exchange protein 100; AltName: Full=ADP-ribosylation factors guanine nucleotide-exchange protein 2; AltName: Full=Brefeldin-resistant Arf-GEF 2 protein	Q6DN90	3.98054e-126	67	453.366	460	311
THRIPS_11_08_2011_01283	cept1_xenla ame: full=choline ethanolaminephosphotransferase 1	378	gi|82209827|sp|Q7ZYQ3.1|CEPT1_XENLARecName: Full=Choline/ethanolaminephosphotransferase 1	Q7ZYQ3	1.21851e-20	67	98.2117	101	68
THRIPS_11_08_2011_01288	inhibitor lrp isoform b	255	gi|91093987|ref|XP_969515.1|PREDICTED: similar to GH28553p [Tribolium castaneum] >gi|270010917|gb|EFA07365.1| hypothetical protein TcasGA2_TC016340 [Tribolium castaneum]	XP_969515	8.16353e-31	89	136.732	84	75
THRIPS_11_08_2011_01293	sos_drome ame: full=protein son of sevenless	347	gi|76800652|sp|P26675.2|SOS_DROMERecName: Full=Protein son of sevenless	P26675	1.88414e-29	73	127.487	116	85
THRIPS_11_08_2011_01296	rpgrh_caeel ame: full=x-linked retinitis pigmentosa gtpase regulator homolog ame: full=gut granule loss protein 4	283	gi|62511101|sp|Q5DX34.1|RPGRH_CAEELRecName: Full=X-linked retinitis pigmentosa GTPase regulator homolog; AltName: Full=Gut granule loss protein 4	Q5DX34	2.47061e-13	57	73.9442	88	51
THRIPS_11_08_2011_01299	eaf_drose ame: full=ell-associated factor eaf	1358	gi|263419678|sp|B4HQT6.1|EAF_DROSERecName: Full=Ell-associated factor Eaf	B4HQT6	1.03115e-33	58	144.821	243	142
THRIPS_11_08_2011_01301	gm4d_yere8 ame: full=probable gdp-mannose -dehydratase ame: full=gdp-d-mannose dehydratase ame: full=	204	gi|134047779|sp|Q56872.2|GM4D_YERE8RecName: Full=Probable GDP-mannose 4,6-dehydratase; AltName: Full=GDP-D-mannose dehydratase; AltName: Full=ORF13.7	Q56872	1.55834e-23	86	107.842	67	58
THRIPS_11_08_2011_01302	tgfa1_human ame: full=transforming growth factor-beta receptor-associated protein 1 short=tgf-beta receptor-associated protein 1 short=trap-1 short=trap1	512	gi|74730711|sp|Q8WUH2.1|TGFA1_HUMANRecName: Full=Transforming growth factor-beta receptor-associated protein 1; Short=TGF-beta receptor-associated protein 1; Short=TRAP-1; Short=TRAP1	Q8WUH2	8.81338e-14	60	76.2554	109	66
THRIPS_11_08_2011_01305	cp190_drome ame: full=centrosome-associated zinc finger protein cp190 ame: full=protein enhancer of mod 4-1 ame: full=dmap190	429	gi|93204565|sp|Q24478.2|CP190_DROMERecName: Full=Centrosome-associated zinc finger protein CP190; AltName: Full=Protein enhancer of mod(mdg4)4-1; AltName: Full=dMAP190	Q24478	1.07186e-14	48	78.5666	135	65
THRIPS_11_08_2011_01310	gshb_human ame: full=glutathione synthetase short=gsh synthetase short=gsh-s ame: full=glutathione synthase	1590	gi|1346191|sp|P48637.1|GSHB_HUMANRecName: Full=Glutathione synthetase; Short=GSH synthetase; Short=GSH-S; AltName: Full=Glutathione synthase	P48637	1.27914e-102	64	374.015	467	301
THRIPS_11_08_2011_01311	marf_drome ame: full=transmembrane gtpase marf ame: full=mitochondrial assembly regulatory factor ame: full=mitofusin	2842	gi|47605850|sp|Q7YU24.1|MARF_DROMERecName: Full=Transmembrane GTPase Marf; AltName: Full=Mitochondrial assembly regulatory factor; AltName: Full=Mitofusin	Q7YU24	0	77	844.343	701	543
THRIPS_11_08_2011_01312	nu301_drome ame: full=nucleosome-remodeling factor subunit nurf301 ame: full=enhancer of bithorax ame: full=nucleosome-remodeling factor 215 kda subunit short=nurf-215	947	gi|74872079|sp|Q9W0T1.2|NU301_DROMERecName: Full=Nucleosome-remodeling factor subunit NURF301; AltName: Full=Enhancer of bithorax; AltName: Full=Nucleosome-remodeling factor 215 kDa subunit; Short=NURF-215	Q9W0T1	4.23145e-14	76	78.9518	85	65
THRIPS_11_08_2011_01313	rs6_manse ame: full=40s ribosomal protein s6	960	gi|2500492|sp|Q94624.1|RS6_MANSERecName: Full=40S ribosomal protein S6	Q94624	5.33668e-105	92	380.948	251	231
THRIPS_11_08_2011_01314	dhx57_human ame: full= atp-dependent rna helicase dhx57 ame: full=deah box protein 57	2531	gi|94710252|sp|Q6P158.2|DHX57_HUMANRecName: Full=Putative ATP-dependent RNA helicase DHX57; AltName: Full=DEAH box protein 57	Q6P158	0	71	414.846	448	320
THRIPS_11_08_2011_01316	galt5_drome ame: full=polypeptide n-acetylgalactosaminyltransferase 5 short=pp- ase 5 ame: full=protein-udp acetylgalactosaminyltransferase 5 ame: full=udp- c:polypeptide n-acetylgalactosaminyltransferase 5	6347	gi|51315874|sp|Q6WV17.2|GALT5_DROMERecName: Full=Polypeptide N-acetylgalactosaminyltransferase 5; Short=pp-GaNTase 5; AltName: Full=Protein-UDP acetylgalactosaminyltransferase 5; AltName: Full=UDP-GalNAc:polypeptide N-acetylgalactosaminyltransferase 5	Q6WV17	0	79	902.123	622	493
THRIPS_11_08_2011_01318	tpm_locmi ame: full=tropomyosin	4328	gi|401204|sp|P31816.1|TPM_LOCMIRecName: Full=Tropomyosin	P31816	1.46661e-96	88	355.525	281	248
THRIPS_11_08_2011_01320	dpp3_human ame: full=dipeptidyl peptidase 3 ame: full=dipeptidyl aminopeptidase iii ame: full=dipeptidyl arylamidase iii ame: full=dipeptidyl peptidase iii short=dpp iii	901	gi|20532389|sp|Q9NY33.2|DPP3_HUMANRecName: Full=Dipeptidyl peptidase 3; AltName: Full=Dipeptidyl aminopeptidase III; AltName: Full=Dipeptidyl arylamidase III; AltName: Full=Dipeptidyl peptidase III; Short=DPP III	Q9NY33	4.97651e-62	67	228.794	230	156
THRIPS_11_08_2011_01321	dpp3_drome ame: full=dipeptidyl peptidase 3 ame: full=dipeptidyl aminopeptidase iii short=dipeptidyl arylamidase iii ame: full=dipeptidyl peptidase iii short=dpp iii	1429	gi|33518622|sp|Q9VHR8.2|DPP3_DROMERecName: Full=Dipeptidyl peptidase 3; AltName: Full=Dipeptidyl aminopeptidase III; Short=Dipeptidyl arylamidase III; AltName: Full=Dipeptidyl peptidase III; Short=DPP III	Q9VHR8	2.71564e-157	76	555.444	438	337
THRIPS_11_08_2011_01322	myo5a_human ame: full=myosin-va ame: full=dilute myosin heavy non-muscle ame: full=myosin heavy chain 12 ame: full=myosin-12 ame: full=myoxin	1440	gi|296439234|sp|Q9Y4I1.2|MYO5A_HUMANRecName: Full=Myosin-Va; AltName: Full=Dilute myosin heavy chain, non-muscle; AltName: Full=Myosin heavy chain 12; AltName: Full=Myosin-12; AltName: Full=Myoxin	Q9Y4I1	7.7612e-27	45	122.094	495	226
THRIPS_11_08_2011_01323	tm63b_human ame: full=transmembrane protein 63b	4941	gi|74744754|sp|Q5T3F8.1|TM63B_HUMANRecName: Full=Transmembrane protein 63B	Q5T3F8	4.08945e-151	59	536.954	749	449
THRIPS_11_08_2011_01324	copg2_fugru ame: full=coatomer subunit gamma-2 ame: full=gamma-2-coat protein short=gamma-2-cop	2854	gi|82177624|sp|Q9I8E6.1|COPG2_FUGRURecName: Full=Coatomer subunit gamma-2; AltName: Full=Gamma-2-coat protein; Short=Gamma-2-COP	Q9I8E6	0	80	1021.92	863	695
THRIPS_11_08_2011_01325	ubr1_drome ame: full=e3 ubiquitin-protein ligase ubr1 ame: full=n-recognin ame: full=ubiquitin-protein ligase e3-alpha	6537	gi|73622070|sp|Q9VX91.2|UBR1_DROMERecName: Full=E3 ubiquitin-protein ligase UBR1; AltName: Full=N-recognin; AltName: Full=Ubiquitin-protein ligase E3-alpha	Q9VX91	1.48266e-164	59	582.022	830	491
THRIPS_11_08_2011_01326	fbx11_human ame: full=f-box only protein 11 ame: full=vitiligo-associated protein 1 short=vit-1	2694	gi|124012093|sp|Q86XK2.3|FBX11_HUMANRecName: Full=F-box only protein 11; AltName: Full=Vitiligo-associated protein 1; Short=VIT-1	Q86XK2	0	84	1127.08	785	662
THRIPS_11_08_2011_01327	egln1_human ame: full=egl nine homolog 1 ame: full=hypoxia-inducible factor prolyl hydroxylase 2 short=hif-ph2 short=hif-prolyl hydroxylase 2 short=hph-2 ame: full=prolyl hydroxylase domain-containing protein 2 short=phd2 ame: full=sm-20	432	gi|32129514|sp|Q9GZT9.1|EGLN1_HUMANRecName: Full=Egl nine homolog 1; AltName: Full=Hypoxia-inducible factor prolyl hydroxylase 2; Short=HIF-PH2; Short=HIF-prolyl hydroxylase 2; Short=HPH-2; AltName: Full=Prolyl hydroxylase domain-containing protein 2; Short=PHD2; AltName: Full=SM-20	Q9GZT9	2.45809e-06	57	50.8322	52	30
THRIPS_11_08_2011_01330	s27a4_macfa ame: full=long-chain fatty acid transport protein 4 short=fatp-4 short=fatty acid transport protein 4 ame: full=solute carrier family 27 member 4	2881	gi|75075521|sp|Q4R3Y4.1|S27A4_MACFARecName: Full=Long-chain fatty acid transport protein 4; Short=FATP-4; Short=Fatty acid transport protein 4; AltName: Full=Solute carrier family 27 member 4	Q4R3Y4	2.78411e-157	65	556.599	601	395
THRIPS_11_08_2011_01332	dus3_human ame: full=dual specificity protein phosphatase 3 ame: full=dual specificity protein phosphatase vhr	1117	gi|1718191|sp|P51452.1|DUS3_HUMANRecName: Full=Dual specificity protein phosphatase 3; AltName: Full=Dual specificity protein phosphatase VHR >gi|75061955|sp|Q5RD73.1|DUS3_PONAB RecName: Full=Dual specificity protein phosphatase 3	P51452	6.95387e-29	65	100.523	107	70
THRIPS_11_08_2011_01333	nucb2_rat ame: full=nucleobindin-2 ame: full=dna-binding protein nefa flags: precursor	2580	gi|17367404|sp|Q9JI85.1|NUCB2_RATRecName: Full=Nucleobindin-2; AltName: Full=DNA-binding protein NEFA; Flags: Precursor	Q9JI85	1.93478e-69	65	264.618	337	221
THRIPS_11_08_2011_01334	mdhc_chick ame: full=malate cytoplasmic ame: full=cytosolic malate dehydrogenase	1377	gi|82082933|sp|Q5ZME2.1|MDHC_CHICKRecName: Full=Malate dehydrogenase, cytoplasmic; AltName: Full=Cytosolic malate dehydrogenase	Q5ZME2	1.86931e-115	83	416.387	312	259
THRIPS_11_08_2011_01335	rab37_human ame: full=ras-related protein rab-37	2069	gi|20139581|sp|Q96AX2.3|RAB37_HUMANRecName: Full=Ras-related protein Rab-37	Q96AX2	7.40419e-77	84	288.886	198	168
THRIPS_11_08_2011_01336	puf68_drome ame: full=poly -binding-splicing factor half pint short=protein half pint ame: full=68 kda poly -binding-splicing factor ame: full=puf60 homolog	1812	gi|41688713|sp|Q8T6B9.2|PUF68_DROMERecName: Full=Poly(U)-binding-splicing factor half pint; Short=Protein half pint; AltName: Full=68 kDa poly(U)-binding-splicing factor; AltName: Full=PUF60 homolog	Q8T6B9	3.83727e-90	84	332.798	225	189
THRIPS_11_08_2011_01338	failed axon connections protein	556	gi|270003072|gb|EEZ99519.1|hypothetical protein TcasGA2_TC000100 [Tribolium castaneum]	EEZ99519	1.02848e-36	90	156.762	87	79
THRIPS_11_08_2011_01339	setd5_mouse ame: full=set domain-containing protein 5	872	gi|143584355|sp|Q5XJV7.2|SETD5_MOUSERecName: Full=SET domain-containing protein 5	Q5XJV7	4.70383e-25	48	115.161	237	114
THRIPS_11_08_2011_01341	alg11_danre ame: full=asparagine-linked glycosylation protein 11 homolog	3888	gi|158563942|sp|Q7ZW24.2|ALG11_DANRERecName: Full=Asparagine-linked glycosylation protein 11 homolog	Q7ZW24	1.92988e-124	67	447.973	472	318
THRIPS_11_08_2011_01342	ugpa_bovin ame: full=utp--glucose-1-phosphate uridylyltransferase ame: full=udp-glucose pyrophosphorylase short=udpgp short=ugpase	1823	gi|731049|sp|Q07130.2|UGPA_BOVINRecName: Full=UTP--glucose-1-phosphate uridylyltransferase; AltName: Full=UDP-glucose pyrophosphorylase; Short=UDPGP; Short=UGPase	Q07130	1.0974e-177	79	623.624	495	395
THRIPS_11_08_2011_01343	gbf1_human ame: full=golgi-specific brefeldin a-resistance guanine nucleotide exchange factor 1 short=bfa-resistant gef 1	6929	gi|13124260|sp|Q92538.2|GBF1_HUMANRecName: Full=Golgi-specific brefeldin A-resistance guanine nucleotide exchange factor 1; Short=BFA-resistant GEF 1	Q92538	0	64	1517.29	1791	1148
THRIPS_11_08_2011_01344	csd_staes ame: full=probable cysteine desulfurase	1564	gi|38604656|sp|Q8CTA4.1|CSD_STAESRecName: Full=Probable cysteine desulfurase	Q8CTA4	1.47191e-10	43	68.1662	287	125
THRIPS_11_08_2011_01346	snak_drome ame: full=serine protease snake flags: precursor	2080	gi|47117822|sp|P05049.2|SNAK_DROMERecName: Full=Serine protease snake; Flags: Precursor	P05049	1.28079e-52	46	208.379	448	207
THRIPS_11_08_2011_01347	fbxw9_human ame: full=f-box wd repeat-containing protein 9 ame: full=f-box and wd-40 domain-containing protein 9	1043	gi|115311596|sp|Q5XUX1.2|FBXW9_HUMANRecName: Full=F-box/WD repeat-containing protein 9; AltName: Full=F-box and WD-40 domain-containing protein 9	Q5XUX1	1.38927e-24	58	79.337	106	62
THRIPS_11_08_2011_01348	cr3l4_xentr ame: full=cyclic amp-responsive element-binding protein 3-like protein 4 short=camp-responsive element-binding protein 3-like protein 4 contains: ame: full=processed cyclic amp-responsive element-binding protein 3-like protein 4	3875	gi|123884459|sp|Q08CW8.1|CR3L4_XENTRRecName: Full=Cyclic AMP-responsive element-binding protein 3-like protein 4; Short=cAMP-responsive element-binding protein 3-like protein 4; Contains: RecName: Full=Processed cyclic AMP-responsive element-binding protein 3-like protein 4	Q08CW8	8.88975e-21	77	103.605	118	91
THRIPS_11_08_2011_01352	arf2_drome ame: full=adp-ribosylation factor 2 ame: full=darf ii	2002	gi|728881|sp|P40945.2|ARF2_DROMERecName: Full=ADP-ribosylation factor 2; AltName: Full=dARF II	P40945	7.6298e-87	94	322.013	179	169
THRIPS_11_08_2011_01355	tbcd9_human ame: full=tbc1 domain family member 9 ame: full=tbc1 domain family member 9a	2497	gi|148887054|sp|Q6ZT07.2|TBCD9_HUMANRecName: Full=TBC1 domain family member 9; AltName: Full=TBC1 domain family member 9A	Q6ZT07	0	65	785.023	883	580
THRIPS_11_08_2011_01357	cd041_danre ame: full=upf0636 protein c4orf41 homolog ame: full=protein foie gras	482	gi|123910003|sp|Q1RLX4.1|CD041_DANRERecName: Full=UPF0636 protein C4orf41 homolog; AltName: Full=Protein foie gras	Q1RLX4	1.73139e-34	66	144.821	160	107
THRIPS_11_08_2011_01358	hypothetical protein ECU04_1370 [Encephalitozoon cuniculi GB-M1]	205	gi|19074216|ref|NP_584822.1|hypothetical protein ECU04_1370 [Encephalitozoon cuniculi GB-M1] >gi|19068858|emb|CAD25326.1| hypothetical protein [Encephalitozoon cuniculi GB-M1]	NP_584822	1.01543e-09	67	66.6254	67	45
THRIPS_11_08_2011_01360	atp gtp-binding protein	203	gi|289766373|ref|ZP_06525751.1|ATP/GTP-binding protein [Fusobacterium sp. D11] >gi|289717928|gb|EFD81940.1| ATP/GTP-binding protein [Fusobacterium sp. D11]	ZP_06525751	2.77445e-07	62	58.5362	67	42
THRIPS_11_08_2011_01362	rock1_rabit ame: full=rho-associated protein kinase 1 ame: full=corneal epithelial rho-associated-ser thr kinase 1 ame: full=hebm1 ame: full=rho- coiled-coil-containing protein kinase 1 ame: full=camp-dependent protein kinase rock-i short= ame: full=p160 rock-1 short=p160rock	1077	gi|47605964|sp|O77819.1|ROCK1_RABITRecName: Full=Rho-associated protein kinase 1; AltName: Full=Corneal epithelial Rho-associated-Ser/Thr kinase 1; AltName: Full=HEBM1; AltName: Full=Rho-associated, coiled-coil-containing protein kinase 1; AltName: Full=cAMP-dependent protein kinase ROCK-I; Short=CePKA; AltName: Full=p160 ROCK-1; Short=p160ROCK	O77819	3.9821e-51	52	202.216	367	191
THRIPS_11_08_2011_01363	dhx9_bovin ame: full=atp-dependent rna helicase a ame: full=deah box protein 9 ame: full=nuclear dna helicase ii short=ndh ii	203	gi|2500541|sp|Q28141.1|DHX9_BOVINRecName: Full=ATP-dependent RNA helicase A; AltName: Full=DEAH box protein 9; AltName: Full=Nuclear DNA helicase II; Short=NDH II	Q28141	1.04528e-19	86	95.1301	67	58
THRIPS_11_08_2011_01364	msh6_human ame: full=dna mismatch repair protein msh6 short=hmsh6 ame: full=g t mismatch-binding protein short=gtbp short=gtmbp ame: full= -alpha 160 kda subunit short=p160	203	gi|68067672|sp|P52701.2|MSH6_HUMANRecName: Full=DNA mismatch repair protein Msh6; Short=hMSH6; AltName: Full=G/T mismatch-binding protein; Short=GTBP; Short=GTMBP; AltName: Full=MutS-alpha 160 kDa subunit; Short=p160	P52701	1.32535e-06	65	51.6026	52	34
THRIPS_11_08_2011_01368	b lymphoma mo-mlv insertion region	800	gi|156547031|ref|XP_001601096.1|PREDICTED: similar to B lymphoma Mo-MLV insertion region (mouse) [Nasonia vitripennis]	XP_001601096	1.51211e-06	43	57.7658	173	75
THRIPS_11_08_2011_01372	conserved hypothetical protein [Pediculus humanus corporis]	261	gi|242014022|ref|XP_002427697.1|conserved hypothetical protein [Pediculus humanus corporis] >gi|212512132|gb|EEB14959.1| conserved hypothetical protein [Pediculus humanus corporis]	XP_002427697	3.66438e-07	79	58.151	43	34
THRIPS_11_08_2011_01373	hypothetical conserved protein	204	gi|27381777|ref|NP_773306.1|hypothetical protein bll6666 [Bradyrhizobium japonicum USDA 110] >gi|27354946|dbj|BAC51931.1| bll6666 [Bradyrhizobium japonicum USDA 110]	NP_773306	1.04837e-14	100	83.1889	44	44
THRIPS_11_08_2011_01375	rab4b_danre ame: full=ras-related protein rab-4b	1148	gi|62901076|sp|Q68EK7.1|RAB4B_DANRERecName: Full=Ras-related protein Rab-4B	Q68EK7	3.65867e-82	89	305.449	213	190
THRIPS_11_08_2011_01378	polx_tobac ame: full=retrovirus-related pol polyprotein from transposon tnt 1-94 includes: ame: full=protease includes: ame: full=reverse transcriptase includes: ame: full=endonuclease	540	gi|130582|sp|P10978.1|POLX_TOBACRecName: Full=Retrovirus-related Pol polyprotein from transposon TNT 1-94; Includes: RecName: Full=Protease; Includes: RecName: Full=Reverse transcriptase; Includes: RecName: Full=Endonuclease	P10978	2.35393e-23	53	108.227	191	102
THRIPS_11_08_2011_01379	zswm6_human ame: full=zinc finger swim domain-containing protein 6	204	gi|229462808|sp|Q9HCJ5.2|ZSWM6_HUMANRecName: Full=Zinc finger SWIM domain-containing protein 6	Q9HCJ5	1.55365e-23	86	107.842	68	59
THRIPS_11_08_2011_01381	isoc1_danre ame: full=isochorismatase domain-containing protein 1	304	gi|119371159|sp|Q08C33.1|ISOC1_DANRERecName: Full=Isochorismatase domain-containing protein 1	Q08C33	1.84772e-24	77	110.923	99	77
THRIPS_11_08_2011_01385	rasa1_rat ame: full=ras gtpase-activating protein 1 short=gap short=gtpase-activating protein short= ame: full=ras p21 protein activator ame: full=p120gap	971	gi|1708065|sp|P50904.1|RASA1_RATRecName: Full=Ras GTPase-activating protein 1; Short=GAP; Short=GTPase-activating protein; Short=RasGAP; AltName: Full=Ras p21 protein activator; AltName: Full=p120GAP	P50904	2.86616e-82	69	305.449	323	226
THRIPS_11_08_2011_01389	serine threonine-protein kinase ulk3	208	gi|110749150|ref|XP_396911.3|PREDICTED: similar to CG8866-PA, isoform A [Apis mellifera]	XP_396911	7.48825e-13	76	77.0258	55	42
THRIPS_11_08_2011_01391	aifm1_human ame: full=apoptosis-inducing factor mitochondrial ame: full=programmed cell death protein 8 flags: precursor	1331	gi|13431764|sp|O95831.1|AIFM1_HUMANRecName: Full=Apoptosis-inducing factor 1, mitochondrial; AltName: Full=Programmed cell death protein 8; Flags: Precursor	O95831	6.33877e-121	69	434.491	415	290
THRIPS_11_08_2011_01393	smc1a_xenla ame: full=structural maintenance of chromosomes protein 1a short=smc protein 1a short=smc-1a short=xsmc1	231	gi|29336591|sp|O93308.1|SMC1A_XENLARecName: Full=Structural maintenance of chromosomes protein 1A; Short=SMC protein 1A; Short=SMC-1A; Short=xSMC1	O93308	4.43542e-10	68	63.1586	77	53
THRIPS_11_08_2011_01394	tyrosine-protein phosphatase non-receptor type 23	2118	gi|242007435|ref|XP_002424545.1|conserved hypothetical protein [Pediculus humanus corporis] >gi|212507988|gb|EEB11807.1| conserved hypothetical protein [Pediculus humanus corporis]	XP_002424545	2.02323e-25	37	122.479	641	240
THRIPS_11_08_2011_01399	arhgc_human ame: full=rho guanine nucleotide exchange factor 12 ame: full=leukemia-associated	209	gi|34395525|sp|Q9NZN5.1|ARHGC_HUMANRecName: Full=Rho guanine nucleotide exchange factor 12; AltName: Full=Leukemia-associated RhoGEF	Q9NZN5	2.74051e-12	70	70.4774	64	45
THRIPS_11_08_2011_01400	leucine rich protein	313	gi|302517875|ref|ZP_07270217.1|LOW QUALITY PROTEIN: conserved hypothetical protein [Streptomyces sp. SPB78] >gi|302426770|gb|EFK98585.1| LOW QUALITY PROTEIN: conserved hypothetical protein [Streptomyces sp. SPB78]	ZP_07270217	1.21908e-12	81	71.633	43	35
THRIPS_11_08_2011_01402	mib1_xenla ame: full=e3 ubiquitin-protein ligase mib1 ame: full=mind bomb homolog 1	815	gi|68565488|sp|Q6GNY1.1|MIB1_XENLARecName: Full=E3 ubiquitin-protein ligase mib1; AltName: Full=Mind bomb homolog 1	Q6GNY1	1.81885e-28	98	126.331	61	60
THRIPS_11_08_2011_01404	serine threonine-protein kinase 16	226	gi|307181418|gb|EFN69013.1|Serine/threonine-protein kinase 16 [Camponotus floridanus]	EFN69013	2.45344e-11	89	72.0182	48	43
THRIPS_11_08_2011_01406	hypothetical protein ECU01_0230 [Encephalitozoon cuniculi GB-M1]	271	gi|85690917|ref|XP_965858.1|hypothetical protein ECU01_0230 [Encephalitozoon cuniculi GB-M1] >gi|19068425|emb|CAD24893.1| hypothetical protein [Encephalitozoon cuniculi GB-M1]	XP_965858	6.3482e-20	75	100.523	89	67
THRIPS_11_08_2011_01409	disheveled associated activator of morphogenesis	205	gi|189236799|ref|XP_970309.2|PREDICTED: similar to disheveled associated activator of morphogenesis [Tribolium castaneum]	XP_970309	2.67484e-18	85	95.1301	67	57
THRIPS_11_08_2011_01413	5nt3_danre ame: full=cytosolic 5 -nucleotidase 3 ame: full=cytosolic 5 -nucleotidase iii short=cn-iii	408	gi|182627617|sp|Q7SYN4.2|5NT3_DANRERecName: Full=Cytosolic 5'-nucleotidase 3; AltName: Full=Cytosolic 5'-nucleotidase III; Short=cN-III	Q7SYN4	3.09349e-32	72	136.732	133	97
THRIPS_11_08_2011_01414	y114_chlmu ame: full=uncharacterized protein tc_0114	1366	gi|30316295|sp|Q9PLI5.2|Y114_CHLMURecName: Full=Uncharacterized protein TC_0114	Q9PLI5	3.70063e-31	74	136.346	122	91
THRIPS_11_08_2011_01418	canb_drome ame: full=calpain-b ame: full=calcium-activated neutral proteinase b short=canp b contains: ame: full=calpain-b catalytic subunit 1 contains: ame: full=calpain-b catalytic subunit 2	2453	gi|62510466|sp|Q9VT65.2|CANB_DROMERecName: Full=Calpain-B; AltName: Full=Calcium-activated neutral proteinase B; Short=CANP B; Contains: RecName: Full=Calpain-B catalytic subunit 1; Contains: RecName: Full=Calpain-B catalytic subunit 2	Q9VT65	0	77	924.08	703	546
THRIPS_11_08_2011_01419	conserved hypothetical protein [Culex quinquefasciatus]	698	gi|170048032|ref|XP_001851504.1|conserved hypothetical protein [Culex quinquefasciatus] >gi|167870255|gb|EDS33638.1| conserved hypothetical protein [Culex quinquefasciatus]	XP_001851504	1.48453e-06	52	57.3806	105	55
THRIPS_11_08_2011_01425	rpgf2_mouse ame: full=rap guanine nucleotide exchange factor 2 ame: full=neural rap guanine nucleotide exchange protein short=nrap gep ame: full=pdz domain-containing guanine nucleotide exchange factor 1 short=pdz-gef1	302	gi|34395652|sp|Q8CHG7.1|RPGF2_MOUSERecName: Full=Rap guanine nucleotide exchange factor 2; AltName: Full=Neural RAP guanine nucleotide exchange protein; Short=nRap GEP; AltName: Full=PDZ domain-containing guanine nucleotide exchange factor 1; Short=PDZ-GEF1	Q8CHG7	4.90126e-09	76	59.6918	51	39
THRIPS_11_08_2011_01429	zinc finger ccch domain-containing protein 13	424	gi|307173918|gb|EFN64666.1|Zinc finger CCCH domain-containing protein 13 [Camponotus floridanus]	EFN64666	1.13255e-08	62	63.1586	64	40
THRIPS_11_08_2011_01432	ankl2_mouse ame: full=ankyrin repeat and lem domain-containing protein 2	310	gi|134034148|sp|Q6P1H6.2|ANKL2_MOUSERecName: Full=Ankyrin repeat and LEM domain-containing protein 2	Q6P1H6	2.6716e-07	50	53.9138	74	37
THRIPS_11_08_2011_01439	med13_drome ame: full=mediator of rna polymerase ii transcription subunit 13 ame: full=mediator complex subunit 13 ame: full=mediator complex subunit skuld ame: full=protein blind spot ame: full=protein poils aux pattes ame: full=dtrap240	1046	gi|74876666|sp|Q7KTX8.1|MED13_DROMERecName: Full=Mediator of RNA polymerase II transcription subunit 13; AltName: Full=Mediator complex subunit 13; AltName: Full=Mediator complex subunit Skuld; AltName: Full=Protein blind spot; AltName: Full=Protein poils aux pattes; AltName: Full=dTRAP240	Q7KTX8	1.32008e-43	82	177.178	128	105
THRIPS_11_08_2011_01444	chdm_drome ame: full=chromodomain-helicase-dna-binding protein mi-2 homolog ame: full=atp-dependent helicase mi-2 short=dmi-2	306	gi|13124018|sp|O97159.2|CHDM_DROMERecName: Full=Chromodomain-helicase-DNA-binding protein Mi-2 homolog; AltName: Full=ATP-dependent helicase Mi-2; Short=dMi-2	O97159	1.03846e-43	91	174.866	102	93
THRIPS_11_08_2011_01447	ubiq_enccu ame: full=ubiquitin flags: precursor	268	gi|51702116|sp|Q8SWD4.1|UBIQ_ENCCURecName: Full=Ubiquitin; Flags: Precursor	Q8SWD4	3.38566e-18	97	90.1225	46	45
THRIPS_11_08_2011_01451	grou_drome ame: full=protein groucho ame: full=enhancer of split m9 10 protein short=e m9 10	475	gi|122065196|sp|P16371.3|GROU_DROMERecName: Full=Protein groucho; AltName: Full=Enhancer of split m9/10 protein; Short=E(spl)m9/10	P16371	4.78049e-82	93	302.753	158	148
THRIPS_11_08_2011_01454	m3k1_human ame: full=mitogen-activated protein kinase kinase kinase 1 ame: full=mapk erk kinase kinase 1 short=mek kinase 1 short=mekk 1	987	gi|218512139|sp|Q13233.4|M3K1_HUMANRecName: Full=Mitogen-activated protein kinase kinase kinase 1; AltName: Full=MAPK/ERK kinase kinase 1; Short=MEK kinase 1; Short=MEKK 1	Q13233	1.6866e-53	78	209.92	169	132
THRIPS_11_08_2011_01456	galm_ponab ame: full=aldose 1-epimerase ame: full=galactose mutarotase	278	gi|84028321|sp|Q5R8U1.1|GALM_PONABRecName: Full=Aldose 1-epimerase; AltName: Full=Galactose mutarotase	Q5R8U1	8.84446e-11	67	65.4698	55	37
THRIPS_11_08_2011_01462	ppme1_mouse ame: full=protein phosphatase methylesterase 1 short=pme-1	382	gi|108935875|sp|Q8BVQ5.5|PPME1_MOUSERecName: Full=Protein phosphatase methylesterase 1; Short=PME-1	Q8BVQ5	3.09468e-16	65	83.5741	98	64
THRIPS_11_08_2011_01463	dock9_rat ame: full=dedicator of cytokinesis protein 9 ame: full=cdc42 guanine nucleotide exchange factor zizimin-1 ame: full=protein trg	693	gi|32469608|sp|Q63603.2|DOCK9_RATRecName: Full=Dedicator of cytokinesis protein 9; AltName: Full=Cdc42 guanine nucleotide exchange factor zizimin-1; AltName: Full=Protein TRG	Q63603	8.60456e-63	74	239.965	220	164
THRIPS_11_08_2011_01464	eif3k_bommo ame: full=eukaryotic translation initiation factor 3 subunit k short=eif3k ame: full=eif-3 p25	807	gi|121958896|sp|Q1HPS4.1|EIF3K_BOMMORecName: Full=Eukaryotic translation initiation factor 3 subunit K; Short=eIF3k; AltName: Full=eIF-3 p25	Q1HPS4	4.82974e-82	80	304.294	215	172
THRIPS_11_08_2011_01467	cap1_bovin ame: full=adenylyl cyclase-associated protein 1 short=cap 1	1400	gi|122056071|sp|Q3SYV4.3|CAP1_BOVINRecName: Full=Adenylyl cyclase-associated protein 1; Short=CAP 1	Q3SYV4	2.10215e-21	72	103.99	94	68
THRIPS_11_08_2011_01472	tnpo1_bovin ame: full=transportin-1 ame: full=importin beta-2 ame: full=karyopherin beta-2	378	gi|259535856|sp|Q3SYU7.2|TNPO1_BOVINRecName: Full=Transportin-1; AltName: Full=Importin beta-2; AltName: Full=Karyopherin beta-2	Q3SYU7	3.18843e-53	89	206.453	125	112
THRIPS_11_08_2011_01473	uso1_yeast ame: full=intracellular protein transport protein uso1 short=int-1	2854	gi|56757595|sp|P25386.2|USO1_YEASTRecName: Full=Intracellular protein transport protein USO1; Short=Int-1	P25386	1.47652e-09	45	65.855	407	187
THRIPS_11_08_2011_01475	vps53_chick ame: full=vacuolar protein sorting-associated protein 53 homolog	573	gi|82082519|sp|Q5ZLD7.1|VPS53_CHICKRecName: Full=Vacuolar protein sorting-associated protein 53 homolog	Q5ZLD7	1.51949e-66	79	251.906	191	152
THRIPS_11_08_2011_01478	lrc40_danre ame: full=leucine-rich repeat-containing protein 40	307	gi|82240198|sp|Q7SXW3.1|LRC40_DANRERecName: Full=Leucine-rich repeat-containing protein 40	Q7SXW3	1.23813e-12	56	71.633	94	53
THRIPS_11_08_2011_01481	ugpa_bovin ame: full=utp--glucose-1-phosphate uridylyltransferase ame: full=udp-glucose pyrophosphorylase short=udpgp short=ugpase	947	gi|731049|sp|Q07130.2|UGPA_BOVINRecName: Full=UTP--glucose-1-phosphate uridylyltransferase; AltName: Full=UDP-glucose pyrophosphorylase; Short=UDPGP; Short=UGPase	Q07130	3.51629e-77	76	288.5	224	172
THRIPS_11_08_2011_01484	shan2_human ame: full=sh3 and multiple ankyrin repeat domains protein 2 short=shank2 ame: full=cortactin-binding protein 1 short= 1 ame: full=proline-rich synapse-associated protein 1	755	gi|254763402|sp|Q9UPX8.3|SHAN2_HUMANRecName: Full=SH3 and multiple ankyrin repeat domains protein 2; Short=Shank2; AltName: Full=Cortactin-binding protein 1; Short=CortBP1; AltName: Full=Proline-rich synapse-associated protein 1	Q9UPX8	3.03121e-19	68	95.5153	98	67
THRIPS_11_08_2011_01485	lsd1_drome ame: full=lipid storage droplets surface-binding protein 1	384	gi|57012982|sp|Q9VCI3.2|LSD1_DROMERecName: Full=Lipid storage droplets surface-binding protein 1	Q9VCI3	8.42763e-14	67	75.485	74	50
THRIPS_11_08_2011_01486	pgta_bovin ame: full=geranylgeranyl transferase type-2 subunit alpha ame: full=geranylgeranyl transferase type ii subunit alpha ame: full=rab geranyl-geranyltransferase subunit alpha short=rab gg transferase alpha short=rab ggtase alpha ame: full=rab geranylgeranyltransferase subunit alpha	554	gi|75070069|sp|Q5EA80.1|PGTA_BOVINRecName: Full=Geranylgeranyl transferase type-2 subunit alpha; AltName: Full=Geranylgeranyl transferase type II subunit alpha; AltName: Full=Rab geranyl-geranyltransferase subunit alpha; Short=Rab GG transferase alpha; Short=Rab GGTase alpha; AltName: Full=Rab geranylgeranyltransferase subunit alpha	Q5EA80	1.51948e-44	70	178.718	178	125
THRIPS_11_08_2011_01487	dnlz_danre ame: full=dnl-type zinc finger protein	616	gi|166918284|sp|A1L1P7.1|DNLZ_DANRERecName: Full=DNL-type zinc finger protein	A1L1P7	3.13686e-23	76	108.227	82	63
THRIPS_11_08_2011_01489	ef1g_artsa ame: full=elongation factor 1-gamma short=ef-1-gamma ame: full=eef-1b gamma	657	gi|119164|sp|P12261.3|EF1G_ARTSARecName: Full=Elongation factor 1-gamma; Short=EF-1-gamma; AltName: Full=eEF-1B gamma	P12261	2.04694e-87	87	321.627	202	176
THRIPS_11_08_2011_01491	prod_drome ame: full=proline mitochondrial ame: full=proline oxidase ame: full=protein sluggish-a flags: precursor	641	gi|73920742|sp|Q04499.2|PROD_DROMERecName: Full=Proline dehydrogenase, mitochondrial; AltName: Full=Proline oxidase; AltName: Full=Protein sluggish-A; Flags: Precursor	Q04499	3.45037e-44	76	177.948	155	118
THRIPS_11_08_2011_01492	idgfl_bommo ame: full=chitinase-like protein en03 ame: full=imaginal disk growth factor-like protein flags: precursor	661	gi|74848915|sp|Q9GV28.1|IDGFL_BOMMORecName: Full=Chitinase-like protein EN03; AltName: Full=Imaginal disk growth factor-like protein; Flags: Precursor	Q9GV28	1.72181e-25	74	115.931	108	80
THRIPS_11_08_2011_01493	lman1_mouse ame: full=protein ergic-53 ame: full=er-golgi intermediate compartment 53 kda protein ame: full=lectin mannose-binding 1 ame: full=p58 flags: precursor	2963	gi|49035535|sp|Q9D0F3.1|LMAN1_MOUSERecName: Full=Protein ERGIC-53; AltName: Full=ER-Golgi intermediate compartment 53 kDa protein; AltName: Full=Lectin mannose-binding 1; AltName: Full=p58; Flags: Precursor	Q9D0F3	4.80983e-112	62	406.371	479	299
THRIPS_11_08_2011_01494	zswm7_danre ame: full=zinc finger swim domain-containing protein 7	401	gi|160221308|sp|A4FVI0.2|ZSWM7_DANRERecName: Full=Zinc finger SWIM domain-containing protein 7	A4FVI0	3.35285e-10	62	63.5438	70	44
THRIPS_11_08_2011_01496	ef1d_drome ame: full=probable elongation factor 1-delta short=ef-1-delta	896	gi|13124243|sp|Q9VL18.1|EF1D_DROMERecName: Full=Probable elongation factor 1-delta; Short=EF-1-delta	Q9VL18	6.32004e-49	69	194.512	222	154
THRIPS_11_08_2011_01497	a60da_drome ame: full=letm1 and ef-hand domain-containing protein anon- mitochondrial ame: full=leucine zipper-ef-hand-containing transmembrane protein 1 flags: precursor	1501	gi|13124700|sp|P91927.2|A60DA_DROMERecName: Full=LETM1 and EF-hand domain-containing protein anon-60Da, mitochondrial; AltName: Full=Leucine zipper-EF-hand-containing transmembrane protein 1; Flags: Precursor	P91927	2.37888e-10	66	67.3958	109	73
THRIPS_11_08_2011_01498	sv2a_rat ame: full=synaptic vesicle glycoprotein 2a short=synaptic vesicle protein 2 short=synaptic vesicle protein 2a	2111	gi|108935908|sp|Q02563.2|SV2A_RATRecName: Full=Synaptic vesicle glycoprotein 2A; Short=Synaptic vesicle protein 2; Short=Synaptic vesicle protein 2A	Q02563	5.57875e-28	42	74.3294	250	107
THRIPS_11_08_2011_01500	mvl_drome ame: full=protein malvolio	2164	gi|34978384|sp|P49283.2|MVL_DROMERecName: Full=Protein Malvolio	P49283	0	78	635.95	553	432
THRIPS_11_08_2011_01501	dnak_guith ame: full=chaperone protein dnak ame: full=hsp70 ame: full=heat shock 70 kda protein ame: full=heat shock protein 70	445	gi|6166123|sp|P29215.2|DNAK_GUITHRecName: Full=Chaperone protein dnaK; AltName: Full=HSP70; AltName: Full=Heat shock 70 kDa protein; AltName: Full=Heat shock protein 70	P29215	2.06759e-14	56	77.7962	148	84
THRIPS_11_08_2011_01504	conserved hypothetical protein [Culex quinquefasciatus]	1303	gi|170040506|ref|XP_001848037.1|conserved hypothetical protein [Culex quinquefasciatus] >gi|167864147|gb|EDS27530.1| conserved hypothetical protein [Culex quinquefasciatus]	XP_001848037	6.61685e-07	45	60.077	192	88
THRIPS_11_08_2011_01505	zinc finger fyve domain-containing protein 26	505	gi|157135378|ref|XP_001656629.1|hypothetical protein AaeL_AAEL003229 [Aedes aegypti] >gi|108881258|gb|EAT45483.1| hypothetical protein AaeL_AAEL003229 [Aedes aegypti]	XP_001656629	9.9047e-08	60	60.077	89	54
THRIPS_11_08_2011_01509	ncor1_xentr ame: full=nuclear receptor corepressor 1 short=n- short=n- 1 short=xn-	2673	gi|85541753|sp|Q4KKX4.1|NCOR1_XENTRRecName: Full=Nuclear receptor corepressor 1; Short=N-CoR; Short=N-CoR1; Short=xN-CoR	Q4KKX4	2.5313e-72	71	274.248	258	185
THRIPS_11_08_2011_01510	cat2_clok5 ame: full=4-hydroxybutyrate coenzyme a transferase	3445	gi|172046066|sp|P38942.3|CAT2_CLOK5RecName: Full=4-hydroxybutyrate coenzyme A transferase	P38942	1.26364e-95	62	352.058	420	262
THRIPS_11_08_2011_01512	senescence-associated protein	770	gi|13359451|dbj|BAB33421.1|putative senescence-associated protein [Pisum sativum]	BAB33421	7.73583e-24	91	71.2478	34	31
THRIPS_11_08_2011_01513	reverse ribonuclease integrase	325	gi|270010054|gb|EFA06502.1|hypothetical protein TcasGA2_TC009401 [Tribolium castaneum]	EFA06502	9.34597e-11	61	62.7734	67	41
THRIPS_11_08_2011_01516	birc6_human ame: full=baculoviral iap repeat-containing protein 6 ame: full=ubiquitin-conjugating bir domain enzyme apollon	1071	gi|12585192|sp|Q9NR09.1|BIRC6_HUMANRecName: Full=Baculoviral IAP repeat-containing protein 6; AltName: Full=Ubiquitin-conjugating BIR domain enzyme apollon	Q9NR09	1.15218e-26	53	120.939	248	133
THRIPS_11_08_2011_01517	k0020_human ame: full=pumilio domain-containing protein kiaa0020 ame: full=hbv x-transactivated gene 5 protein ame: full=hbv xag-transactivated protein 5 ame: full=minor histocompatibility antigen ha-8 short=hla-ha8	850	gi|81175177|sp|Q15397.3|K0020_HUMANRecName: Full=Pumilio domain-containing protein KIAA0020; AltName: Full=HBV X-transactivated gene 5 protein; AltName: Full=HBV XAg-transactivated protein 5; AltName: Full=Minor histocompatibility antigen HA-8; Short=HLA-HA8	Q15397	1.85123e-34	63	92.8189	117	74
THRIPS_11_08_2011_01519	dehydration responsive protein	272	gi|301016726|dbj|BAJ11784.1|dehydration responsive protein [Corchorus olitorius]	BAJ11784	2.85619e-12	60	75.0998	90	54
THRIPS_11_08_2011_01521	dtx_drome ame: full=protein deltex	383	gi|34098346|sp|Q23985.2|DTX_DROMERecName: Full=Protein deltex	Q23985	3.2025e-13	51	73.559	151	78
THRIPS_11_08_2011_01522	blm_drome ame: full=bloom syndrome protein homolog short=dmblm ame: full=mutagen-sensitive protein 309 ame: full= helicase homolog	829	gi|17366114|sp|Q9VGI8.1|BLM_DROMERecName: Full=Bloom syndrome protein homolog; Short=Dmblm; AltName: Full=Mutagen-sensitive protein 309; AltName: Full=RecQ helicase homolog	Q9VGI8	1.63685e-40	66	166.392	157	105
THRIPS_11_08_2011_01523	kuzbanian cg7147- isoform a	277	gi|110763695|ref|XP_393114.3|PREDICTED: similar to kuzbanian CG7147-PA, isoform A [Apis mellifera]	XP_393114	1.61033e-07	88	59.3066	36	32
THRIPS_11_08_2011_01524	myro1_brebr ame: full=myrosinase 1 ame: full=beta-glucosidase 1 ame: full=beta-thioglucosidase 1 ame: full=beta-thioglucosidase glucohydrolase 1 ame: full=sinigrinase 1 ame: full=thioglucosidase 1	496	gi|74938515|sp|Q95X01.1|MYRO1_BREBRRecName: Full=Myrosinase 1; AltName: Full=Beta-glucosidase 1; AltName: Full=Beta-thioglucosidase 1; AltName: Full=Beta-thioglucosidase glucohydrolase 1; AltName: Full=Sinigrinase 1; AltName: Full=Thioglucosidase 1	Q95X01	4.00268e-29	69	127.102	114	79
THRIPS_11_08_2011_01525	tbc25_human ame: full=tbc1 domain family member 25	405	gi|296452922|sp|Q3MII6.2|TBC25_HUMANRecName: Full=TBC1 domain family member 25	Q3MII6	1.95386e-18	59	90.8929	110	65
THRIPS_11_08_2011_01527	pg1 protein	336	gi|270496068|ref|ZP_06213060.1|hypothetical protein AcavDRAFT_4806 [Acidovorax avenae subsp. avenae ATCC 19860] >gi|270327086|gb|EFA37945.1| hypothetical protein AcavDRAFT_4806 [Acidovorax avenae subsp. avenae ATCC 19860]	ZP_06213060	1.07965e-11	57	73.1738	114	66
THRIPS_11_08_2011_01536	cul1_mouse ame: full=cullin-1 short=cul-1	3262	gi|13124104|sp|Q9WTX6.1|CUL1_MOUSERecName: Full=Cullin-1; Short=CUL-1	Q9WTX6	0	86	1166.76	772	668
THRIPS_11_08_2011_01542	edc4_danre ame: full=enhancer of mrna-decapping protein 4	694	gi|123912758|sp|Q1LUT1.1|EDC4_DANRERecName: Full=Enhancer of mRNA-decapping protein 4	Q1LUT1	2.70601e-24	51	112.079	221	114
THRIPS_11_08_2011_01543	gfpt2_rat ame: full=glucosamine--fructose-6-phosphate aminotransferase 2 ame: full=d-fructose-6-phosphate amidotransferase 2 ame: full=glutamine:fructose 6 phosphate amidotransferase 2 short=gfat 2 short=gfat2 ame: full=hexosephosphate aminotransferase 2	3269	gi|90185130|sp|Q4KMC4.3|GFPT2_RATRecName: Full=Glucosamine--fructose-6-phosphate aminotransferase [isomerizing] 2; AltName: Full=D-fructose-6-phosphate amidotransferase 2; AltName: Full=Glutamine:fructose 6 phosphate amidotransferase 2; Short=GFAT 2; Short=GFAT2; AltName: Full=Hexosephosphate aminotransferase 2	Q4KMC4	0	82	929.087	683	561
THRIPS_11_08_2011_01544	xbp1_human ame: full=x-box-binding protein 1 short=xbp-1 ame: full=tax-responsive element-binding protein 5	2653	gi|60416406|sp|P17861.2|XBP1_HUMANRecName: Full=X-box-binding protein 1; Short=XBP-1; AltName: Full=Tax-responsive element-binding protein 5	P17861	7.92428e-18	47	93.2041	262	124
THRIPS_11_08_2011_01546	PREDICTED: similar to RH35990p [Nasonia vitripennis]	2102	gi|156538557|ref|XP_001607418.1|PREDICTED: similar to RH35990p [Nasonia vitripennis]	XP_001607418	4.98721e-08	56	64.6994	76	43
THRIPS_11_08_2011_01547	dna polymerase v	2146	gi|156537125|ref|XP_001603225.1|PREDICTED: similar to DNA polymerase v [Nasonia vitripennis]	XP_001603225	5.68687e-84	54	317.005	618	336
THRIPS_11_08_2011_01548	vatg_manse ame: full=v-type proton atpase subunit g short=v-atpase subunit g ame: full=v-atpase 13 kda subunit ame: full=vacuolar proton pump subunit g	2024	gi|2493139|sp|Q25532.1|VATG_MANSERecName: Full=V-type proton ATPase subunit G; Short=V-ATPase subunit G; AltName: Full=V-ATPase 13 kDa subunit; AltName: Full=Vacuolar proton pump subunit G	Q25532	2.99162e-22	92	107.457	113	104
THRIPS_11_08_2011_01549	yboxh_aplca ame: full=y-box factor homolog ame: full=apy1	2057	gi|1175568|sp|P41824.1|YBOXH_APLCARecName: Full=Y-box factor homolog; AltName: Full=APY1	P41824	9.79311e-29	80	129.028	116	93
THRIPS_11_08_2011_01551	ctns_drome ame: full=cystinosin homolog	2352	gi|34223744|sp|Q9VCR7.2|CTNS_DROMERecName: Full=Cystinosin homolog	Q9VCR7	1.90436e-92	66	340.887	389	258
THRIPS_11_08_2011_01552	seric_nemve ame: full=probable serine incorporator	2393	gi|115305737|sp|Q3MHV9.1|SERC1_BOVINRecName: Full=Serine incorporator 1; AltName: Full=Tumor differentially expressed protein 2	Q3MHV9	9.91932e-113	66	408.297	455	301
THRIPS_11_08_2011_01553	dhe3_drome ame: full=glutamate mitochondrial short=gdh flags: precursor	2656	gi|12644316|sp|P54385.2|DHE3_DROMERecName: Full=Glutamate dehydrogenase, mitochondrial; Short=GDH; Flags: Precursor	P54385	0	91	947.192	563	514
THRIPS_11_08_2011_01554	mysa_drome ame: full=myosin heavy muscle	2801	gi|110825729|sp|P05661.4|MYSA_DROMERecName: Full=Myosin heavy chain, muscle	P05661	0	91	1283.09	933	851
THRIPS_11_08_2011_01556	csde1_rat ame: full=cold shock domain-containing protein e1 ame: full=protein unr	5253	gi|137045|sp|P18395.1|CSDE1_RATRecName: Full=Cold shock domain-containing protein E1; AltName: Full=Protein UNR	P18395	0	62	644.81	806	507
THRIPS_11_08_2011_01557	cpn2_human ame: full=carboxypeptidase n subunit 2 ame: full=carboxypeptidase n 83 kda chain ame: full=carboxypeptidase n large subunit ame: full=carboxypeptidase n polypeptide 2 ame: full=carboxypeptidase n regulatory subunit flags: precursor	4480	gi|52788240|sp|P22792.2|CPN2_HUMANRecName: Full=Carboxypeptidase N subunit 2; AltName: Full=Carboxypeptidase N 83 kDa chain; AltName: Full=Carboxypeptidase N large subunit; AltName: Full=Carboxypeptidase N polypeptide 2; AltName: Full=Carboxypeptidase N regulatory subunit; Flags: Precursor	P22792	3.11218e-33	46	145.206	401	188
THRIPS_11_08_2011_01558	rfip1_rat ame: full=rab11 family-interacting protein 1 short=rab11-fip1 ame: full=rab-coupling protein	3466	gi|97181130|sp|Q3B7T9.1|RFIP1_RATRecName: Full=Rab11 family-interacting protein 1; Short=Rab11-FIP1; AltName: Full=Rab-coupling protein	Q3B7T9	1.58598e-29	59	132.494	166	98
THRIPS_11_08_2011_01559	k0664_aedae ame: full=protein kiaa0664 homolog	4939	gi|122118806|sp|Q17N71.1|K0664_AEDAERecName: Full=Protein KIAA0664 homolog	Q17N71	0	78	1148.65	963	753
THRIPS_11_08_2011_01560	sptn5_human ame: full=spectrin beta brain 4 ame: full=bspecv ame: full=beta-v spectrin ame: full= non-erythroid beta chain 4	13928	gi|17369320|sp|Q9NRC6.1|SPTN5_HUMANRecName: Full=Spectrin beta chain, brain 4; AltName: Full=BSPECV; AltName: Full=Beta-V spectrin; AltName: Full=Spectrin, non-erythroid beta chain 4	Q9NRC6	0	52	1285.01	2675	1410
THRIPS_11_08_2011_01561	glsn_medsa ame: full=glutamate synthase amyloplastic ame: full=nadh-gogat flags: precursor	5107	gi|417073|sp|Q03460.1|GLSN_MEDSARecName: Full=Glutamate synthase [NADH], amyloplastic; AltName: Full=NADH-GOGAT; Flags: Precursor	Q03460	0	69	1684.08	1739	1200
THRIPS_11_08_2011_01562	cmc_drome ame: full=calcium-binding mitochondrial carrier protein aralar1	3754	gi|13124102|sp|Q9VA73.1|CMC_DROMERecName: Full=Calcium-binding mitochondrial carrier protein Aralar1	Q9VA73	0	84	535.413	396	333
THRIPS_11_08_2011_01563	nss_tswvl ame: full=non-structural protein ns-s	6127	gi|128579|sp|P26003.1|NSS_TSWVLRecName: Full=Non-structural protein NS-S	P26003	0	97	846.269	467	453
THRIPS_11_08_2011_01564	rtn1_pantr ame: full=reticulon-1	2181	gi|61216395|sp|Q5IS59.1|RTN1_PANTRRecName: Full=Reticulon-1	Q5IS59	1.77683e-44	76	181.415	178	137
THRIPS_11_08_2011_01565	hecd1_mouse ame: full=e3 ubiquitin-protein ligase hectd1 ame: full=hect domain-containing protein 1 ame: full=protein open mind	3313	gi|302425231|sp|Q69ZR2.2|HECD1_MOUSERecName: Full=E3 ubiquitin-protein ligase HECTD1; AltName: Full=HECT domain-containing protein 1; AltName: Full=Protein open mind	Q69ZR2	0	78	1167.53	886	695
THRIPS_11_08_2011_01566	ipo4_human ame: full=importin-4 short=imp4 ame: full=importin-4b short=imp4b ame: full=ran-binding protein 4 short= 4	3456	gi|126302558|sp|Q8TEX9.2|IPO4_HUMANRecName: Full=Importin-4; Short=Imp4; AltName: Full=Importin-4b; Short=Imp4b; AltName: Full=Ran-binding protein 4; Short=RanBP4	Q8TEX9	1.79819e-158	57	560.836	1106	637
THRIPS_11_08_2011_01569	tacc2_human ame: full=transforming acidic coiled-coil-containing protein 2 ame: full=anti-zuai-1 short=azu-1	2994	gi|122066295|sp|O95359.3|TACC2_HUMANRecName: Full=Transforming acidic coiled-coil-containing protein 2; AltName: Full=Anti-Zuai-1; Short=AZU-1	O95359	3.95873e-23	59	82.4185	125	74
THRIPS_11_08_2011_01570	kdm4d_rat ame: full=lysine-specific demethylase 4d ame: full= domain-containing histone demethylation protein 3d ame: full=jumonji domain-containing protein 2d	2106	gi|239977149|sp|A1A5Q5.1|KDM4D_RATRecName: Full=Lysine-specific demethylase 4D; AltName: Full=JmjC domain-containing histone demethylation protein 3D; AltName: Full=Jumonji domain-containing protein 2D	A1A5Q5	1.27266e-07	47	58.9214	120	57
THRIPS_11_08_2011_01574	acadm_drome ame: full=probable medium-chain specific acyl- mitochondrial short=mcad flags: precursor	1938	gi|28376845|sp|Q9VSA3.1|ACADM_DROMERecName: Full=Probable medium-chain specific acyl-CoA dehydrogenase, mitochondrial; Short=MCAD; Flags: Precursor	Q9VSA3	0	88	637.106	395	351
THRIPS_11_08_2011_01575	myro1_brebr ame: full=myrosinase 1 ame: full=beta-glucosidase 1 ame: full=beta-thioglucosidase 1 ame: full=beta-thioglucosidase glucohydrolase 1 ame: full=sinigrinase 1 ame: full=thioglucosidase 1	1597	gi|74938515|sp|Q95X01.1|MYRO1_BREBRRecName: Full=Myrosinase 1; AltName: Full=Beta-glucosidase 1; AltName: Full=Beta-thioglucosidase 1; AltName: Full=Beta-thioglucosidase glucohydrolase 1; AltName: Full=Sinigrinase 1; AltName: Full=Thioglucosidase 1	Q95X01	1.34259e-67	51	257.684	479	246
THRIPS_11_08_2011_01576	if4e_xenla ame: full=eukaryotic translation initiation factor 4e short=eif-4e short=eif4e ame: full=eif-4f 25 kda subunit ame: full=mrna cap-binding protein	1641	gi|1352437|sp|P48597.1|IF4E_XENLARecName: Full=Eukaryotic translation initiation factor 4E; Short=eIF-4E; Short=eIF4E; AltName: Full=eIF-4F 25 kDa subunit; AltName: Full=mRNA cap-binding protein	P48597	1.38288e-67	73	257.684	204	149
THRIPS_11_08_2011_01579	mbrl_human ame: full=membralin	1723	gi|68565394|sp|Q4ZIN3.1|MBRL_HUMANRecName: Full=Membralin	Q4ZIN3	1.48794e-35	65	151.369	158	104
THRIPS_11_08_2011_01580	4et_human ame: full=eukaryotic translation initiation factor 4e transporter short=4e-t short=eif4e transporter ame: full=eukaryotic translation initiation factor 4e nuclear import factor 1	1298	gi|22095430|sp|Q9NRA8.2|4ET_HUMANRecName: Full=Eukaryotic translation initiation factor 4E transporter; Short=4E-T; Short=eIF4E transporter; AltName: Full=Eukaryotic translation initiation factor 4E nuclear import factor 1	Q9NRA8	2.95922e-06	70	53.5286	48	34
THRIPS_11_08_2011_01581	tbc15_mouse ame: full=tbc1 domain family member 15 ame: full=gtpase-activating protein rab7 short=gap for rab7 short=rab7-gap	2313	gi|59798971|sp|Q9CXF4.1|TBC15_MOUSERecName: Full=TBC1 domain family member 15; AltName: Full=GTPase-activating protein RAB7; Short=GAP for RAB7; Short=Rab7-GAP	Q9CXF4	1.17219e-110	57	401.364	604	345
THRIPS_11_08_2011_01583	nu1m_anoqu ame: full=nadh-ubiquinone oxidoreductase chain 1 ame: full=nadh dehydrogenase subunit 1	1110	gi|462750|sp|P33502.1|NU1M_ANOQURecName: Full=NADH-ubiquinone oxidoreductase chain 1; AltName: Full=NADH dehydrogenase subunit 1	P33502	3.64168e-39	63	162.54	267	170
THRIPS_11_08_2011_01584	xbp1_human ame: full=x-box-binding protein 1 short=xbp-1 ame: full=tax-responsive element-binding protein 5	1785	gi|60416406|sp|P17861.2|XBP1_HUMANRecName: Full=X-box-binding protein 1; Short=XBP-1; AltName: Full=Tax-responsive element-binding protein 5	P17861	5.02158e-18	47	93.2041	262	124
THRIPS_11_08_2011_01586	ch60_drome ame: full=60 kda heat shock mitochondrial ame: full=60 kda chaperonin ame: full=cpn60 ame: full=heat shock protein 60 short=hsp-60 ame: full=hsp60 ame: full=mitochondrial matrix protein p1 flags: precursor	2367	gi|12644042|sp|O02649.3|CH60_DROMERecName: Full=60 kDa heat shock protein, mitochondrial; AltName: Full=60 kDa chaperonin; AltName: Full=CPN60; AltName: Full=Heat shock protein 60; Short=HSP-60; AltName: Full=Hsp60; AltName: Full=Mitochondrial matrix protein P1; Flags: Precursor	O02649	0	90	783.097	549	497
THRIPS_11_08_2011_01587	yipf1_mouse ame: full=protein yipf1 ame: full=yip1 family member 1	1144	gi|81902306|sp|Q91VU1.1|YIPF1_MOUSERecName: Full=Protein YIPF1; AltName: Full=YIP1 family member 1	Q91VU1	4.65367e-45	58	182.185	278	164
THRIPS_11_08_2011_01588	titin_drome ame: full=titin ame: full=d-titin ame: full=kettin	1425	gi|172045934|sp|Q9I7U4.3|TITIN_DROMERecName: Full=Titin; AltName: Full=D-Titin; AltName: Full=Kettin	Q9I7U4	0	86	613.609	382	332
THRIPS_11_08_2011_01590	thim_bovin ame: full=3-ketoacyl- mitochondrial ame: full=acetyl- acyltransferase ame: full=beta-ketothiolase ame: full=mitochondrial 3-oxoacyl- thiolase	1616	gi|121956694|sp|Q3T0R7.1|THIM_BOVINRecName: Full=3-ketoacyl-CoA thiolase, mitochondrial; AltName: Full=Acetyl-CoA acyltransferase; AltName: Full=Beta-ketothiolase; AltName: Full=Mitochondrial 3-oxoacyl-CoA thiolase	Q3T0R7	3.00061e-124	78	281.952	232	182
THRIPS_11_08_2011_01591	pol2_drome ame: full=retrovirus-related pol polyprotein from transposon 297 includes: ame: full=protease includes: ame: full=reverse transcriptase includes: ame: full=endonuclease	972	gi|130398|sp|P20825.1|POL2_DROMERecName: Full=Retrovirus-related Pol polyprotein from transposon 297; Includes: RecName: Full=Protease; Includes: RecName: Full=Reverse transcriptase; Includes: RecName: Full=Endonuclease	P20825	6.27117e-29	55	128.257	212	117
THRIPS_11_08_2011_01593	s27a4_mouse ame: full=long-chain fatty acid transport protein 4 short=fatp-4 short=fatty acid transport protein 4 ame: full=solute carrier family 27 member 4	1336	gi|81902280|sp|Q91VE0.1|S27A4_MOUSERecName: Full=Long-chain fatty acid transport protein 4; Short=FATP-4; Short=Fatty acid transport protein 4; AltName: Full=Solute carrier family 27 member 4	Q91VE0	1.63965e-47	77	129.413	90	70
THRIPS_11_08_2011_01594	srprb_rat ame: full=signal recognition particle receptor subunit beta short=sr-beta	1387	gi|123781848|sp|Q4FZX7.1|SRPRB_RATRecName: Full=Signal recognition particle receptor subunit beta; Short=SR-beta	Q4FZX7	5.05584e-52	68	205.682	238	162
THRIPS_11_08_2011_01595	sgsm3_human ame: full=small g protein signaling modulator 3 ame: full=merlin-associated protein ame: full=run and tbc1 domain-containing protein 3 ame: full=rab-gtpase-activating protein short=	370	gi|74760858|sp|Q96HU1.1|SGSM3_HUMANRecName: Full=Small G protein signaling modulator 3; AltName: Full=Merlin-associated protein; AltName: Full=RUN and TBC1 domain-containing protein 3; AltName: Full=Rab-GTPase-activating protein-like protein; Short=RabGAPLP	Q96HU1	2.04687e-07	73	54.299	46	34
THRIPS_11_08_2011_01598	hypothetical protein EAG_02381 [Camponotus floridanus]	489	gi|307171956|gb|EFN63582.1|hypothetical protein EAG_02381 [Camponotus floridanus]	EFN63582	3.64686e-07	73	58.151	53	39
THRIPS_11_08_2011_01603	ercc3_drome ame: full=dna excision repair protein haywire ame: full=atp-dependent dna helicase hay ame: full=ercc-3 homolog protein ame: full=ercc3dm	291	gi|68068031|sp|Q02870.2|ERCC3_DROMERecName: Full=DNA excision repair protein haywire; AltName: Full=ATP-dependent DNA helicase hay; AltName: Full=ERCC-3 homolog protein; AltName: Full=ERCC3Dm	Q02870	1.68411e-46	97	184.111	96	94
THRIPS_11_08_2011_01607	vps4b_bovin ame: full=vacuolar protein sorting-associated protein 4b	2190	gi|122143535|sp|Q0VD48.1|VPS4B_BOVINRecName: Full=Vacuolar protein sorting-associated protein 4B	Q0VD48	7.78263e-141	88	501.516	325	289
THRIPS_11_08_2011_01610	transcriptional family	210	gi|300022677|ref|YP_003755288.1|transcriptional regulator, AraC family [Hyphomicrobium denitrificans ATCC 51888] >gi|299524498|gb|ADJ22967.1| transcriptional regulator, AraC family [Hyphomicrobium denitrificans ATCC 51888]	YP_003755288	4.23795e-08	63	61.2326	58	37
THRIPS_11_08_2011_01614	prdm5_mouse ame: full=pr domain zinc finger protein 5 ame: full=pr domain-containing protein 5	232	gi|251757307|sp|Q9CXE0.2|PRDM5_MOUSERecName: Full=PR domain zinc finger protein 5; AltName: Full=PR domain-containing protein 5	Q9CXE0	1.80633e-11	55	67.781	74	41
THRIPS_11_08_2011_01617	multidrug resistance-associated protein 1	255	gi|170052084|ref|XP_001862061.1|multidrug resistance-associated protein 14 [Culex quinquefasciatus] >gi|167873086|gb|EDS36469.1| multidrug resistance-associated protein 14 [Culex quinquefasciatus]	XP_001862061	1.65638e-07	88	59.3066	34	30
THRIPS_11_08_2011_01634	rgps1_danre ame: full=ras-specific guanine nucleotide-releasing factor 1 ame: full=ral gef with ph domain and sh3-binding motif 1 ame: full= exchange factor 1	319	gi|189040075|sp|B0UXH6.1|RGPS1_DANRERecName: Full=Ras-specific guanine nucleotide-releasing factor RalGPS1; AltName: Full=Ral GEF with PH domain and SH3-binding motif 1; AltName: Full=RalA exchange factor RalGPS1	B0UXH6	1.41107e-24	69	73.9442	62	43
THRIPS_11_08_2011_01636	m3k1_rat ame: full=mitogen-activated protein kinase kinase kinase 1 ame: full=mapk erk kinase kinase 1 short=mek kinase 1 short=mekk 1	237	gi|2499638|sp|Q62925.1|M3K1_RATRecName: Full=Mitogen-activated protein kinase kinase kinase 1; AltName: Full=MAPK/ERK kinase kinase 1; Short=MEK kinase 1; Short=MEKK 1	Q62925	3.27159e-13	73	73.559	69	51
THRIPS_11_08_2011_01639	twf2a_xenla ame: full=twinfilin-2-a	217	gi|82176635|sp|Q7ZXP0.1|TWF2A_XENLARecName: Full=Twinfilin-2-A	Q7ZXP0	5.66651e-18	79	89.3521	67	53
THRIPS_11_08_2011_01651	denn domain-containing	289	gi|91094007|ref|XP_971310.1|PREDICTED: similar to AGAP009774-PA [Tribolium castaneum] >gi|270016162|gb|EFA12610.1| hypothetical protein TcasGA2_TC006851 [Tribolium castaneum]	XP_971310	4.77852e-15	70	84.3445	84	59
THRIPS_11_08_2011_01657	spt4h_drome ame: full=transcription elongation factor spt4 ame: full=drb sensitivity-inducing factor small subunit short=dsif small subunit ame: full=dspt4	300	gi|74866859|sp|Q9TVQ5.1|SPT4H_DROMERecName: Full=Transcription elongation factor SPT4; AltName: Full=DRB sensitivity-inducing factor small subunit; Short=DSIF small subunit; AltName: Full=dSpt4	Q9TVQ5	1.72964e-35	89	147.517	87	78
THRIPS_11_08_2011_01664	cdc27_bovin ame: full=cell division cycle protein 27 homolog	322	gi|281312186|sp|A7Z061.1|CDC27_BOVINRecName: Full=Cell division cycle protein 27 homolog	A7Z061	5.41461e-45	91	179.104	107	98
THRIPS_11_08_2011_01665	spt6h_drome ame: full=transcription elongation factor spt6	279	gi|74872611|sp|Q9W420.1|SPT6H_DROMERecName: Full=Transcription elongation factor SPT6	Q9W420	3.46188e-23	73	106.686	92	68
THRIPS_11_08_2011_01667	med12_drome ame: full=mediator of rna polymerase ii transcription subunit 12 ame: full=mediator complex subunit 12 ame: full=mediator complex subunit kohtalo ame: full=dtrap230	213	gi|74871296|sp|Q9VW47.2|MED12_DROMERecName: Full=Mediator of RNA polymerase II transcription subunit 12; AltName: Full=Mediator complex subunit 12; AltName: Full=Mediator complex subunit Kohtalo; AltName: Full=dTRAP230	Q9VW47	2.55134e-18	76	90.5077	73	56
THRIPS_11_08_2011_01669	nipbl_mouse ame: full=nipped-b-like protein ame: full=delangin homolog ame: full=scc2 homolog	375	gi|50400866|sp|Q6KCD5.1|NIPBL_MOUSERecName: Full=Nipped-B-like protein; AltName: Full=Delangin homolog; AltName: Full=SCC2 homolog	Q6KCD5	4.51144e-07	71	53.1434	71	51
THRIPS_11_08_2011_01671	cp033_bovin ame: full=u11 u12 small nuclear ribonucleoprotein 25 kda protein short=u11 u12 snrnp 25 kda protein	341	gi|160017307|sp|Q3ZBQ4.2|CP033_BOVINRecName: Full=U11/U12 small nuclear ribonucleoprotein 25 kDa protein; Short=U11/U12 snRNP 25 kDa protein	Q3ZBQ4	8.28701e-09	83	58.9214	48	40
THRIPS_11_08_2011_01679	dna repair transcription protein met18	297	gi|158291756|ref|XP_313296.4|AGAP003548-PA [Anopheles gambiae str. PEST] >gi|157017441|gb|EAA08941.4| AGAP003548-PA [Anopheles gambiae str. PEST]	XP_313296	3.28096e-08	55	61.6178	98	54
THRIPS_11_08_2011_01680	rna u small nuclear rna export adapter protein	281	gi|307199198|gb|EFN79885.1|RNA U small nuclear RNA export adapter protein [Harpegnathos saltator]	EFN79885	1.77407e-06	50	55.8398	92	46
THRIPS_11_08_2011_01682	ikka_chick ame: full=inhibitor of nuclear factor kappa-b kinase subunit alpha short=i kappa-b kinase alpha short=ikk-a short=ikk-alpha short= short= kinase ame: full=conserved helix-loop-helix ubiquitous kinase ame: full=nuclear factor nf-kappa-b inhibitor kinase alpha short=nfkbika	286	gi|82233772|sp|Q5ZJB4.1|IKKA_CHICKRecName: Full=Inhibitor of nuclear factor kappa-B kinase subunit alpha; Short=I kappa-B kinase alpha; Short=IKK-A; Short=IKK-alpha; Short=IkBKA; Short=IkappaB kinase; AltName: Full=Conserved helix-loop-helix ubiquitous kinase; AltName: Full=Nuclear factor NF-kappa-B inhibitor kinase alpha; Short=NFKBIKA	Q5ZJB4	2.08665e-20	73	97.4413	89	65
THRIPS_11_08_2011_01688	cell wall-associated hydrolase	252	gi|121281919|gb|ABM53543.1|conserved hypothetical protein [uncultured beta proteobacterium CBNPD1 BAC clone 578]	ABM53543	9.97923e-29	93	129.798	64	60
THRIPS_11_08_2011_01689	hypothetical protein AaeL_AAEL001201 [Aedes aegypti]	251	gi|157115831|ref|XP_001658303.1|hypothetical protein AaeL_AAEL001201 [Aedes aegypti] >gi|108883473|gb|EAT47698.1| hypothetical protein AaeL_AAEL001201 [Aedes aegypti] >gi|122937738|gb|ABM68583.1| AAEL001201-PA [Aedes aegypti]	XP_001658303	2.31208e-06	67	55.4546	58	39
THRIPS_11_08_2011_01706	fnd3a_human ame: full=fibronectin type-iii domain-containing protein 3a ame: full=human gene expressed in odontoblasts	6914	gi|254763442|sp|Q9Y2H6.4|FND3A_HUMANRecName: Full=Fibronectin type-III domain-containing protein 3A; AltName: Full=Human gene expressed in odontoblasts	Q9Y2H6	4.18055e-117	53	424.476	706	380
THRIPS_11_08_2011_01707	fnd3a_human ame: full=fibronectin type-iii domain-containing protein 3a ame: full=human gene expressed in odontoblasts	6997	gi|254763442|sp|Q9Y2H6.4|FND3A_HUMANRecName: Full=Fibronectin type-III domain-containing protein 3A; AltName: Full=Human gene expressed in odontoblasts	Q9Y2H6	4.23447e-117	53	424.476	706	380
THRIPS_11_08_2011_01708	fnd3a_human ame: full=fibronectin type-iii domain-containing protein 3a ame: full=human gene expressed in odontoblasts	7002	gi|254763442|sp|Q9Y2H6.4|FND3A_HUMANRecName: Full=Fibronectin type-III domain-containing protein 3A; AltName: Full=Human gene expressed in odontoblasts	Q9Y2H6	4.23639e-117	53	424.476	706	380
THRIPS_11_08_2011_01710	tyrosine-protein phosphatase non-receptor	8410	gi|270001700|gb|EEZ98147.1|hypothetical protein TcasGA2_TC000572 [Tribolium castaneum]	EEZ98147	1.18797e-16	85	95.5153	62	53
THRIPS_11_08_2011_01712	amph_chick ame: full=amphiphysin	4754	gi|1703280|sp|P50478.1|AMPH_CHICKRecName: Full=Amphiphysin	P50478	5.44703e-52	60	207.608	292	178
THRIPS_11_08_2011_01713	bin1_human ame: full=myc box-dependent-interacting protein 1 ame: full=amphiphysin ii ame: full=amphiphysin-like protein ame: full=box-dependent myc-interacting protein 1 ame: full=bridging integrator 1	4820	gi|14916535|sp|O00499.1|BIN1_HUMANRecName: Full=Myc box-dependent-interacting protein 1; AltName: Full=Amphiphysin II; AltName: Full=Amphiphysin-like protein; AltName: Full=Box-dependent myc-interacting protein 1; AltName: Full=Bridging integrator 1	O00499	7.30592e-12	62	74.3294	79	49
THRIPS_11_08_2011_01714	amph_chick ame: full=amphiphysin	4795	gi|1703280|sp|P50478.1|AMPH_CHICKRecName: Full=Amphiphysin	P50478	5.49948e-52	60	207.608	292	178
THRIPS_11_08_2011_01715	amph_chick ame: full=amphiphysin	4696	gi|1703280|sp|P50478.1|AMPH_CHICKRecName: Full=Amphiphysin	P50478	5.37585e-52	60	207.608	292	178
THRIPS_11_08_2011_01716	predicted protein [Populus trichocarpa]	1996	gi|224103189|ref|XP_002334080.1|predicted protein [Populus trichocarpa] >gi|222869530|gb|EEF06661.1| predicted protein [Populus trichocarpa]	XP_002334080	9.29e-116	86	287.73	171	148
THRIPS_11_08_2011_01719	vas1_bovin ame: full=v-type proton atpase subunit s1 short=v-atpase subunit s1 ame: full=v-atpase ac45 subunit ame: full=v-atpase s1 accessory protein ame: full=vacuolar proton pump subunit s1 flags: precursor	4118	gi|728779|sp|P40682.1|VAS1_BOVINRecName: Full=V-type proton ATPase subunit S1; Short=V-ATPase subunit S1; AltName: Full=V-ATPase Ac45 subunit; AltName: Full=V-ATPase S1 accessory protein; AltName: Full=Vacuolar proton pump subunit S1; Flags: Precursor	P40682	5.23011e-11	40	71.2478	460	186
THRIPS_11_08_2011_01721	ycp9_schpo ame: full=uncharacterized oxidoreductase	939	gi|74619288|sp|Q7Z9I2.1|YCP9_SCHPORecName: Full=Uncharacterized oxidoreductase C663.09c	Q7Z9I2	2.60441e-24	50	112.849	273	137
THRIPS_11_08_2011_01722	ycp6_schpo ame: full=uncharacterized oxidoreductase	1085	gi|74619290|sp|Q7Z9I4.1|YCP6_SCHPORecName: Full=Uncharacterized oxidoreductase C663.06c	Q7Z9I4	8.14674e-28	51	124.79	264	137
THRIPS_11_08_2011_01723	tfcp2_xentr ame: full=transcription factor cp2	4161	gi|82186029|sp|Q6NZH6.1|TFCP2_XENTRRecName: Full=Transcription factor CP2	Q6NZH6	1.11081e-101	60	372.474	493	296
THRIPS_11_08_2011_01724	tfcp2_xentr ame: full=transcription factor cp2	5419	gi|82186029|sp|Q6NZH6.1|TFCP2_XENTRRecName: Full=Transcription factor CP2	Q6NZH6	1.46679e-101	60	372.474	493	296
THRIPS_11_08_2011_01725	immt_drome ame: full= mitochondrial inner membrane protein	5329	gi|251757495|sp|P91928.4|IMMT_DROMERecName: Full=Putative mitochondrial inner membrane protein	P91928	8.44512e-102	54	373.244	677	372
THRIPS_11_08_2011_01726	erf3a_human ame: full=eukaryotic peptide chain release factor gtp-binding subunit erf3a short=eukaryotic peptide chain release factor subunit 3a short=erf3a ame: full=g1 to s phase transition protein 1 homolog	4808	gi|121688|sp|P15170.1|ERF3A_HUMANRecName: Full=Eukaryotic peptide chain release factor GTP-binding subunit ERF3A; Short=Eukaryotic peptide chain release factor subunit 3a; Short=eRF3a; AltName: Full=G1 to S phase transition protein 1 homolog	P15170	0	77	679.093	508	394
THRIPS_11_08_2011_01727	erf3a_human ame: full=eukaryotic peptide chain release factor gtp-binding subunit erf3a short=eukaryotic peptide chain release factor subunit 3a short=erf3a ame: full=g1 to s phase transition protein 1 homolog	2674	gi|121688|sp|P15170.1|ERF3A_HUMANRecName: Full=Eukaryotic peptide chain release factor GTP-binding subunit ERF3A; Short=Eukaryotic peptide chain release factor subunit 3a; Short=eRF3a; AltName: Full=G1 to S phase transition protein 1 homolog	P15170	0	77	679.093	508	394
THRIPS_11_08_2011_01730	syvn1_mouse ame: full=e3 ubiquitin-protein ligase synoviolin ame: full=synovial apoptosis inhibitor 1 flags: precursor	4208	gi|134035040|sp|Q9DBY1.3|SYVN1_MOUSERecName: Full=E3 ubiquitin-protein ligase synoviolin; AltName: Full=Synovial apoptosis inhibitor 1; Flags: Precursor	Q9DBY1	9.11041e-136	86	485.723	307	266
THRIPS_11_08_2011_01732	senescence-associated protein	2266	gi|13359451|dbj|BAB33421.1|putative senescence-associated protein [Pisum sativum]	BAB33421	7.28459e-28	76	122.865	92	70
THRIPS_11_08_2011_01733	sc24c_human ame: full=protein transport protein sec24c ame: full=sec24-related protein c	5767	gi|257051070|sp|P53992.3|SC24C_HUMANRecName: Full=Protein transport protein Sec24C; AltName: Full=SEC24-related protein C	P53992	0	65	950.658	1005	657
THRIPS_11_08_2011_01735	yr554_mimiv ame: full=uncharacterized protein r554	1614	gi|82000363|sp|Q5UR34.1|YR554_MIMIVRecName: Full=Uncharacterized protein R554	Q5UR34	3.9018e-06	75	53.5286	37	28
THRIPS_11_08_2011_01739	mmp14_human ame: full=matrix metalloproteinase-14 short=mmp-14 ame: full=mmp-x1 ame: full=membrane-type matrix metalloproteinase 1 short=mt-mmp 1 short=mtmmp1 ame: full=membrane-type-1 matrix metalloproteinase short=mt1-mmp short=mt1mmp flags: precursor	2379	gi|60392771|sp|P50281.2|MMP14_HUMANRecName: Full=Matrix metalloproteinase-14; Short=MMP-14; AltName: Full=MMP-X1; AltName: Full=Membrane-type matrix metalloproteinase 1; Short=MT-MMP 1; Short=MTMMP1; AltName: Full=Membrane-type-1 matrix metalloproteinase; Short=MT1-MMP; Short=MT1MMP; Flags: Precursor	P50281	1.63798e-83	54	311.227	513	281
THRIPS_11_08_2011_01740	act1_drome ame: full=actin-5c	1702	gi|12644115|sp|P10987.4|ACT1_DROMERecName: Full=Actin-5C >gi|67462097|sp|P84184.1|ACT3B_HELAM RecName: Full=Actin-A3b, cytoplasmic >gi|67462098|sp|P84185.1|ACT5C_ANOGA RecName: Full=Actin-5C; AltName: Full=Actin-1D, cytoplasmic >gi|67462113|sp|P84183.1|ACT4_BOMMO RecName: Full=Actin, cytoplasmic A4	P10987	0	100	759.599	376	376
THRIPS_11_08_2011_01745	y1727_drome ame: full=tbc1 domain family member cg11727	4722	gi|74871763|sp|Q9VYY9.3|Y1727_DROMERecName: Full=TBC1 domain family member CG11727	Q9VYY9	0	76	784.252	787	603
THRIPS_11_08_2011_01746	y1727_drome ame: full=tbc1 domain family member cg11727	4638	gi|74871763|sp|Q9VYY9.3|Y1727_DROMERecName: Full=TBC1 domain family member CG11727	Q9VYY9	0	78	794.653	762	601
THRIPS_11_08_2011_01749	pol4_drome ame: full=retrovirus-related pol polyprotein from transposon 412 includes: ame: full=protease includes: ame: full=reverse transcriptase includes: ame: full=endonuclease	385	gi|130407|sp|P10394.1|POL4_DROMERecName: Full=Retrovirus-related Pol polyprotein from transposon 412; Includes: RecName: Full=Protease; Includes: RecName: Full=Reverse transcriptase; Includes: RecName: Full=Endonuclease	P10394	3.31406e-10	53	63.5438	126	67
THRIPS_11_08_2011_01751	sptca_drome ame: full=spectrin alpha chain	8235	gi|14424461|sp|P13395.2|SPTCA_DROMERecName: Full=Spectrin alpha chain	P13395	0	90	3887.03	2410	2193
THRIPS_11_08_2011_01752	nfat5_human ame: full=nuclear factor of activated t-cells 5 short=nf-at5 ame: full=t-cell transcription factor nfat5 ame: full=tonicity-responsive enhancer-binding protein short= -binding protein short=	4032	gi|9087151|sp|O94916.1|NFAT5_HUMANRecName: Full=Nuclear factor of activated T-cells 5; Short=NF-AT5; AltName: Full=T-cell transcription factor NFAT5; AltName: Full=Tonicity-responsive enhancer-binding protein; Short=TonE-binding protein; Short=TonEBP	O94916	1.84981e-61	72	238.81	193	140
THRIPS_11_08_2011_01753	ssp4_drome ame: full=short spindle protein 4	538	gi|229891669|sp|A1ZAU8.1|SSP4_DROMERecName: Full=Short spindle protein 4	A1ZAU8	4.22859e-25	66	114.005	186	123
THRIPS_11_08_2011_01755	k6pf_drome ame: full=6-phosphofructokinase short=phosphofructokinase ame: full=phosphohexokinase	5393	gi|73620969|sp|P52034.2|K6PF_DROMERecName: Full=6-phosphofructokinase; Short=Phosphofructokinase; AltName: Full=Phosphohexokinase	P52034	0	88	1274.23	787	695
THRIPS_11_08_2011_01756	bat3_human ame: full=large proline-rich protein bat3 ame: full=hla-b-associated transcript 3 ame: full=protein g3	1495	gi|76800648|sp|P46379.2|BAT3_HUMANRecName: Full=Large proline-rich protein BAT3; AltName: Full=HLA-B-associated transcript 3; AltName: Full=Protein G3	P46379	1.69133e-08	77	61.2326	48	37
THRIPS_11_08_2011_01757	bat3_human ame: full=large proline-rich protein bat3 ame: full=hla-b-associated transcript 3 ame: full=protein g3	1578	gi|76800648|sp|P46379.2|BAT3_HUMANRecName: Full=Large proline-rich protein BAT3; AltName: Full=HLA-B-associated transcript 3; AltName: Full=Protein G3	P46379	1.81728e-08	77	61.2326	48	37
THRIPS_11_08_2011_01758	act_manse ame: full= muscle	1640	gi|1703156|sp|P49871.1|ACT_MANSERecName: Full=Actin, muscle	P49871	0	98	746.503	376	370
THRIPS_11_08_2011_01759	act2_bommo ame: full= muscle-type a2	1481	gi|113231|sp|P07837.1|ACT2_BOMMORecName: Full=Actin, muscle-type A2	P07837	0	98	747.658	376	369
THRIPS_11_08_2011_01762	calr_bommo ame: full=calreticulin flags: precursor	3956	gi|75013004|sp|Q7Z1E6.1|CALR_BOMMORecName: Full=Calreticulin; Flags: Precursor	Q7Z1E6	1.49161e-156	81	554.673	379	310
THRIPS_11_08_2011_01763	calr_bommo ame: full=calreticulin flags: precursor	2890	gi|75013004|sp|Q7Z1E6.1|CALR_BOMMORecName: Full=Calreticulin; Flags: Precursor	Q7Z1E6	7.11397e-161	87	568.54	354	310
THRIPS_11_08_2011_01766	conserved hypothetical protein [Paracoccidioides brasiliensis Pb18]	392	gi|226290798|gb|EEH46263.1|conserved hypothetical protein [Paracoccidioides brasiliensis Pb18]	EEH46263	8.4815e-17	56	90.1225	113	64
THRIPS_11_08_2011_01767	senescence-associated protein	380	gi|67538150|ref|XP_662849.1|hypothetical protein AN5245.2 [Aspergillus nidulans FGSC A4] >gi|40742997|gb|EAA62187.1| predicted protein [Aspergillus nidulans FGSC A4] >gi|259484709|tpe|CBF81163.1| TPA: hypothetical protein [Aspergillus nidulans FGSC A4]	XP_662849	3.88561e-14	86	75.8702	43	37
THRIPS_11_08_2011_01769	s12a9_danre ame: full=solute carrier family 12 member 9	1226	gi|187611452|sp|A2BFP5.1|S12A9_DANRERecName: Full=Solute carrier family 12 member 9	A2BFP5	2.51619e-60	60	233.032	303	183
THRIPS_11_08_2011_01770	y114_chlmu ame: full=uncharacterized protein tc_0114	274	gi|30316295|sp|Q9PLI5.2|Y114_CHLMURecName: Full=Uncharacterized protein TC_0114	Q9PLI5	1.56625e-07	65	54.6842	44	29
THRIPS_11_08_2011_01772	hypothetical protein [Ophiocordyceps unilateralis]	827	gi|298283537|gb|ADI72888.1|hypothetical protein [Ophiocordyceps unilateralis]	ADI72888	5.48775e-07	61	59.3066	65	40
THRIPS_11_08_2011_01773	gidrp_mouse ame: full=growth inhibition and differentiation-related protein 88 homolog	1778	gi|71648681|sp|Q8BJM3.1|GIDRP_MOUSERecName: Full=Growth inhibition and differentiation-related protein 88 homolog	Q8BJM3	7.17036e-41	61	169.088	207	128
THRIPS_11_08_2011_01775	rpesp_bovin ame: full=rpe-spondin flags: precursor	1363	gi|122143988|sp|Q32L50.2|RPESP_BOVINRecName: Full=RPE-spondin; Flags: Precursor	Q32L50	2.57296e-08	60	60.4622	50	30
THRIPS_11_08_2011_01777	f-box lrr-repeat protein 7	1287	gi|270005259|gb|EFA01707.1|hypothetical protein TcasGA2_TC007283 [Tribolium castaneum]	EFA01707	9.95302e-24	61	115.931	150	92
THRIPS_11_08_2011_01779	cnot4_human ame: full=ccr4-not transcription complex subunit 4 ame: full=ccr4-associated factor 4 ame: full=e3 ubiquitin-protein ligase cnot4 ame: full=potential transcriptional repressor not4hp	807	gi|115502372|sp|O95628.3|CNOT4_HUMANRecName: Full=CCR4-NOT transcription complex subunit 4; AltName: Full=CCR4-associated factor 4; AltName: Full=E3 ubiquitin-protein ligase CNOT4; AltName: Full=Potential transcriptional repressor NOT4Hp	O95628	2.47474e-86	72	318.546	291	211
THRIPS_11_08_2011_01780	tbab_schco ame: full=tubulin alpha-1b chain	1324	gi|1729838|sp|P49742.1|TBAB_SCHCORecName: Full=Tubulin alpha-1B chain	P49742	0	87	490.345	318	277
THRIPS_11_08_2011_01782	tmx3_xenla ame: full=protein disulfide-isomerase tmx3 ame: full=thioredoxin domain-containing protein 10 ame: full=thioredoxin-related transmembrane protein 3 flags: precursor	1500	gi|78103210|sp|Q6GNG3.1|TMX3_XENLARecName: Full=Protein disulfide-isomerase TMX3; AltName: Full=Thioredoxin domain-containing protein 10; AltName: Full=Thioredoxin-related transmembrane protein 3; Flags: Precursor	Q6GNG3	4.3239e-12	52	73.1738	124	65
THRIPS_11_08_2011_01784	faaa_human ame: full=fumarylacetoacetase short=faa ame: full=beta-diketonase ame: full=fumarylacetoacetate hydrolase	798	gi|119778|sp|P16930.2|FAAA_HUMANRecName: Full=Fumarylacetoacetase; Short=FAA; AltName: Full=Beta-diketonase; AltName: Full=Fumarylacetoacetate hydrolase	P16930	2.7763e-82	79	305.064	210	167
THRIPS_11_08_2011_01785	qcr10_bovin ame: full=cytochrome b-c1 complex subunit 10 ame: full=complex iii subunit 10 ame: full=complex iii subunit xi ame: full=ubiquinol-cytochrome c reductase complex kda protein	428	gi|3915912|sp|P07552.2|QCR10_BOVINRecName: Full=Cytochrome b-c1 complex subunit 10; AltName: Full=Complex III subunit 10; AltName: Full=Complex III subunit XI; AltName: Full=Ubiquinol-cytochrome c reductase complex 6.4 kDa protein	P07552	2.39341e-06	75	50.8322	40	30
THRIPS_11_08_2011_01789	atpk_drome ame: full= atp synthase subunit mitochondrial	777	gi|20137573|sp|Q9W141.1|ATPK_DROMERecName: Full=Putative ATP synthase subunit f, mitochondrial	Q9W141	3.75489e-28	61	125.176	104	64
THRIPS_11_08_2011_01790	predicted protein [Populus trichocarpa]	1245	gi|224160778|ref|XP_002339525.1|predicted protein [Populus trichocarpa] >gi|222871524|gb|EEF08655.1| predicted protein [Populus trichocarpa]	XP_002339525	2.77757e-07	72	61.2326	48	35
THRIPS_11_08_2011_01791	predicted protein [Populus trichocarpa]	1192	gi|224160778|ref|XP_002339525.1|predicted protein [Populus trichocarpa] >gi|222871524|gb|EEF08655.1| predicted protein [Populus trichocarpa]	XP_002339525	2.61821e-07	72	61.2326	48	35
THRIPS_11_08_2011_01793	fop_mouse ame: full=friend of prmt1 protein	1640	gi|54036077|sp|Q9CY57.2|FOP_MOUSERecName: Full=Friend of PRMT1 protein	Q9CY57	2.31674e-14	65	80.8777	114	75
THRIPS_11_08_2011_01794	glycerol-3-phosphate acyltransferase	1806	gi|157133437|ref|XP_001656249.1|glycerol-3-phosphate acyltransferase [Aedes aegypti] >gi|108870840|gb|EAT35065.1| glycerol-3-phosphate acyltransferase [Aedes aegypti]	XP_001656249	2.89868e-33	55	108.227	193	108
THRIPS_11_08_2011_01795	tt39b_xentr ame: full=tetratricopeptide repeat protein 39b short=tpr repeat protein 39b	3568	gi|123910198|sp|Q28DB0.1|TT39B_XENTRRecName: Full=Tetratricopeptide repeat protein 39B; Short=TPR repeat protein 39B	Q28DB0	4.1956e-107	64	344.739	465	298
THRIPS_11_08_2011_01797	lin1_nycco ame: full=line-1 reverse transcriptase homolog	577	gi|126296|sp|P08548.1|LIN1_NYCCORecName: Full=LINE-1 reverse transcriptase homolog	P08548	3.29682e-67	83	249.21	171	143
THRIPS_11_08_2011_01801	hyou1_xenla ame: full=hypoxia up-regulated protein 1 flags: precursor	4798	gi|251764783|sp|Q566I3.2|HYOU1_XENLARecName: Full=Hypoxia up-regulated protein 1; Flags: Precursor	Q566I3	5.14806e-167	74	589.726	537	398
THRIPS_11_08_2011_01803	tom20_xenla ame: full=mitochondrial import receptor subunit tom20 homolog ame: full=mitochondrial 20 kda outer membrane protein ame: full=outer mitochondrial membrane receptor tom20	2677	gi|82177282|sp|Q8AVY0.1|TOM20_XENLARecName: Full=Mitochondrial import receptor subunit TOM20 homolog; AltName: Full=Mitochondrial 20 kDa outer membrane protein; AltName: Full=Outer mitochondrial membrane receptor Tom20	Q8AVY0	1.96133e-40	79	168.318	151	120
THRIPS_11_08_2011_01806	cg11791- isoform a	2609	gi|110759279|ref|XP_001119930.1|PREDICTED: similar to CG11791-PA, isoform A [Apis mellifera]	XP_001119930	6.63025e-13	67	81.2629	83	56
THRIPS_11_08_2011_01807	arip4_xentr ame: full=helicase arip4 ame: full=androgen receptor-interacting protein 4 ame: full=rad54-like protein 2	309	gi|166217265|sp|A4IHD2.1|ARIP4_XENTRRecName: Full=Helicase ARIP4; AltName: Full=Androgen receptor-interacting protein 4; AltName: Full=RAD54-like protein 2	A4IHD2	4.70489e-12	80	69.707	45	36
THRIPS_11_08_2011_01808	polg_rtsvt ame: full=genome polyprotein contains: ame: full= leader protein contains: ame: full=capsid protein 1 short=cp-1 ame: full= kda protein ame: full=coat protein 1 contains: ame: full=capsid protein 2 short=cp-2 ame: full=26 kda protein ame: full=coat protein 2 contains: ame: full=capsid protein 3 short=cp-3 ame: full=31 kda protein ame: full=coat protein 3 contains: ame: full= helicase a…	9297	gi|73921759|sp|Q91PP5.1|POLG_RTSVTRecName: Full=Genome polyprotein; Contains: RecName: Full=Putative leader protein; Contains: RecName: Full=Capsid protein 1; Short=CP-1; AltName: Full=22.5 kDa protein; AltName: Full=Coat protein 1; Contains: RecName: Full=Capsid protein 2; Short=CP-2; AltName: Full=26 kDa protein; AltName: Full=Coat protein 2; Contains: RecName: Full=Capsid protein 3; Short=CP-3…	Q91PP5	8.61264e-49	43	197.978	596	261
THRIPS_11_08_2011_01809	aamp_bovin ame: full=angio-associated migratory cell protein	416	gi|122140241|sp|Q3SZK1.1|AAMP_BOVINRecName: Full=Angio-associated migratory cell protein	Q3SZK1	2.42388e-29	66	127.102	109	73
THRIPS_11_08_2011_01812	zn836_human ame: full=zinc finger protein 836	614	gi|172046146|sp|Q6ZNA1.2|ZN836_HUMANRecName: Full=Zinc finger protein 836	Q6ZNA1	9.34435e-20	58	96.6709	140	82
THRIPS_11_08_2011_01819	PREDICTED: hypothetical protein [Nasonia vitripennis]	362	gi|156539537|ref|XP_001599039.1|PREDICTED: hypothetical protein [Nasonia vitripennis]	XP_001599039	6.99705e-11	55	70.4774	113	63
THRIPS_11_08_2011_01821	poe_drome ame: full=protein purity of essence ame: full=interaction calmodulin and colossal molecular mass protein ame: full=protein calossin ame: full=protein pushover	4926	gi|74869795|sp|Q9VLT5.1|POE_DROMERecName: Full=Protein purity of essence; AltName: Full=Interaction calmodulin and colossal molecular mass protein; AltName: Full=Protein Calossin; AltName: Full=Protein pushover	Q9VLT5	0	49	641.728	1772	881
THRIPS_11_08_2011_01831	kelc_anost ame: full=ring canal kelch homolog ame: full=kelch-like protein 1 contains: ame: full=kelch short protein	208	gi|182628296|sp|Q70JS2.2|KELC_ANOSTRecName: Full=Ring canal kelch homolog; AltName: Full=Kelch-like protein 1; Contains: RecName: Full=Kelch short protein	Q70JS2	7.42858e-26	88	115.546	69	61
THRIPS_11_08_2011_01833	sos_drome ame: full=protein son of sevenless	327	gi|76800652|sp|P26675.2|SOS_DROMERecName: Full=Protein son of sevenless	P26675	3.07842e-24	71	110.153	100	71
THRIPS_11_08_2011_01837	hip1_mouse ame: full=huntingtin-interacting protein 1 short=hip-1 ame: full=huntingtin-interacting protein i short=hip-i	202	gi|221272021|sp|Q8VD75.2|HIP1_MOUSERecName: Full=Huntingtin-interacting protein 1; Short=HIP-1; AltName: Full=Huntingtin-interacting protein I; Short=HIP-I	Q8VD75	1.19595e-15	79	81.6481	64	51
THRIPS_11_08_2011_01838	ndus8_macfa ame: full=nadh dehydrogenase iron-sulfur protein mitochondrial ame: full=complex i-23kd short=ci-23kd ame: full=nadh-ubiquinone oxidoreductase 23 kda subunit flags: precursor	851	gi|62287022|sp|Q60HE3.1|NDUS8_MACFARecName: Full=NADH dehydrogenase [ubiquinone] iron-sulfur protein 8, mitochondrial; AltName: Full=Complex I-23kD; Short=CI-23kD; AltName: Full=NADH-ubiquinone oxidoreductase 23 kDa subunit; Flags: Precursor	Q60HE3	4.01849e-82	86	304.679	186	160
THRIPS_11_08_2011_01839	nbea_drome ame: full=neurobeachin ame: full=a-kinase anchor protein 550 short=akap 550 ame: full=protein rugose ame: full=dakap550	793	gi|32171514|sp|Q9W4E2.2|NBEA_DROMERecName: Full=Neurobeachin; AltName: Full=A-kinase anchor protein 550; Short=AKAP 550; AltName: Full=Protein rugose; AltName: Full=dAKAP550	Q9W4E2	1.13014e-51	85	203.371	134	115
THRIPS_11_08_2011_01843	rs6_manse ame: full=40s ribosomal protein s6	1012	gi|2500492|sp|Q94624.1|RS6_MANSERecName: Full=40S ribosomal protein S6	Q94624	7.18879e-15	88	81.6481	61	54
THRIPS_11_08_2011_01844	kgua_mouse ame: full=guanylate kinase ame: full=gmp kinase	458	gi|2497499|sp|Q64520.2|KGUA_MOUSERecName: Full=Guanylate kinase; AltName: Full=GMP kinase	Q64520	5.9179e-39	78	159.458	118	93
THRIPS_11_08_2011_01846	60s ribosomal protein l4	254	gi|19173410|ref|NP_597213.1|60S RIBOSOMAL PROTEIN L4 [Encephalitozoon cuniculi GB-M1] >gi|19170999|emb|CAD26389.1| 60S RIBOSOMAL PROTEIN L4 [Encephalitozoon cuniculi GB-M1]	NP_597213	1.10333e-27	85	126.331	81	69
THRIPS_11_08_2011_01847	grhpr_human ame: full=glyoxylate reductase hydroxypyruvate reductase	1750	gi|47116943|sp|Q9UBQ7.1|GRHPR_HUMANRecName: Full=Glyoxylate reductase/hydroxypyruvate reductase	Q9UBQ7	1.04382e-52	67	208.379	228	154
THRIPS_11_08_2011_01848	sgt1_drome ame: full=protein sgt1 homolog ecdysoneless	285	gi|17369801|sp|Q9W032.1|SGT1_DROMERecName: Full=Protein SGT1 homolog ecdysoneless	Q9W032	4.21423e-13	51	73.1738	110	57
THRIPS_11_08_2011_01851	probable rna helicase armi	345	gi|242012259|ref|XP_002426851.1|hypothetical protein Phum_PHUM281510 [Pediculus humanus corporis] >gi|212511064|gb|EEB14113.1| hypothetical protein Phum_PHUM281510 [Pediculus humanus corporis]	XP_002426851	3.92982e-09	61	64.6994	86	53
THRIPS_11_08_2011_01854	ssrb_canfa ame: full=translocon-associated protein subunit beta short=trap-beta ame: full=glycoprotein 25h short=gp25h ame: full=signal sequence receptor subunit beta short=ssr-beta flags: precursor	442	gi|134931|sp|P23438.1|SSRB_CANFARecName: Full=Translocon-associated protein subunit beta; Short=TRAP-beta; AltName: Full=Glycoprotein 25H; Short=gp25H; AltName: Full=Signal sequence receptor subunit beta; Short=SSR-beta; Flags: Precursor	P23438	6.94706e-23	72	105.916	87	63
THRIPS_11_08_2011_01855	ulk2_mouse ame: full=serine threonine-protein kinase ulk2 ame: full=serine threonine-protein kinase ame: full=unc-51-like kinase 2	558	gi|78099276|sp|Q9QY01.1|ULK2_MOUSERecName: Full=Serine/threonine-protein kinase ULK2; AltName: Full=Serine/threonine-protein kinase Unc51.2; AltName: Full=Unc-51-like kinase 2	Q9QY01	4.44518e-12	46	70.8626	199	92
THRIPS_11_08_2011_01856	taf3_mouse ame: full=transcription initiation factor tfiid subunit 3 ame: full=140 kda tata box-binding protein-associated factor ame: full=tbp-associated factor 3 ame: full=transcription initiation factor tfiid 140 kda subunit short=taf 140 short=taf140 short=tafii-140 short=tafii140	377	gi|110287981|sp|Q5HZG4.2|TAF3_MOUSERecName: Full=Transcription initiation factor TFIID subunit 3; AltName: Full=140 kDa TATA box-binding protein-associated factor; AltName: Full=TBP-associated factor 3; AltName: Full=Transcription initiation factor TFIID 140 kDa subunit; Short=TAF(II)140; Short=TAF140; Short=TAFII-140; Short=TAFII140	Q5HZG4	4.49056e-23	66	106.301	100	66
THRIPS_11_08_2011_01857	swp1_encin ame: full=spore wall protein 1 flags: precursor	1648	gi|74630563|sp|Q95WA3.1|SWP1_ENCINRecName: Full=Spore wall protein 1; Flags: Precursor	Q95WA3	1.08127e-19	51	98.5969	249	127
THRIPS_11_08_2011_01858	isoform a	439	gi|270002028|gb|EEZ98475.1|hypothetical protein TcasGA2_TC000967 [Tribolium castaneum]	EEZ98475	1.63754e-44	87	182.185	126	110
THRIPS_11_08_2011_01863	GL10144 [Drosophila persimilis]	1060	gi|195170230|ref|XP_002025916.1|GL10144 [Drosophila persimilis] >gi|194110780|gb|EDW32823.1| GL10144 [Drosophila persimilis]	XP_002025916	4.11264e-06	49	56.9954	116	57
THRIPS_11_08_2011_01864	tb10b_mouse ame: full=tbc1 domain family member 10b ame: full=protein wz3-85	2518	gi|294862484|sp|Q8BHL3.2|TB10B_MOUSERecName: Full=TBC1 domain family member 10B; AltName: Full=Protein wz3-85	Q8BHL3	2.45804e-69	80	264.233	199	160
THRIPS_11_08_2011_01865	bat3_mouse ame: full=large proline-rich protein bat3 ame: full=hla-b-associated transcript 3	1455	gi|76364091|sp|Q9Z1R2.1|BAT3_MOUSERecName: Full=Large proline-rich protein BAT3; AltName: Full=HLA-B-associated transcript 3	Q9Z1R2	8.42325e-13	65	75.485	79	52
THRIPS_11_08_2011_01866	arl1_drome ame: full=adp-ribosylation factor-like protein 1	2051	gi|33860128|sp|P25160.5|ARL1_DROMERecName: Full=ADP-ribosylation factor-like protein 1	P25160	4.02446e-91	96	336.265	180	173
THRIPS_11_08_2011_01867	ap2m1_chick ame: full=ap-2 complex subunit mu-1 ame: full=ap-2 mu-2 chain ame: full=clathrin assembly protein complex 2 medium chain ame: full=clathrin coat assembly protein ap50 ame: full=clathrin coat-associated protein ap50 ame: full=ha2 50 kda subunit ame: full=mu2-adaptin ame: full=plasma membrane adaptor ap-2 50 kda protein	2011	gi|82083058|sp|Q5ZMP6.1|AP2M1_CHICKRecName: Full=AP-2 complex subunit mu-1; AltName: Full=AP-2 mu-2 chain; AltName: Full=Clathrin assembly protein complex 2 medium chain; AltName: Full=Clathrin coat assembly protein AP50; AltName: Full=Clathrin coat-associated protein AP50; AltName: Full=HA2 50 kDa subunit; AltName: Full=Mu2-adaptin; AltName: Full=Plasma membrane adaptor AP-2 50 kDa protein	Q5ZMP6	0	91	763.451	444	408
THRIPS_11_08_2011_01868	ub2j2_mouse ame: full=ubiquitin-conjugating enzyme e2 j2 ame: full=non-canonical ubiquitin-conjugating enzyme 2 short=ncube-2	5258	gi|52000869|sp|Q6P073.1|UB2J2_MOUSERecName: Full=Ubiquitin-conjugating enzyme E2 J2; AltName: Full=Non-canonical ubiquitin-conjugating enzyme 2; Short=NCUBE-2	Q6P073	2.78321e-81	71	305.064	260	186
THRIPS_11_08_2011_01869	dpp4_pig ame: full=dipeptidyl peptidase 4 ame: full=dipeptidyl peptidase iv short=dpp iv ame: full=t-cell activation antigen cd26 ame: cd_antigen=cd26 contains: ame: full=dipeptidyl peptidase 4 membrane form ame: full=dipeptidyl peptidase iv membrane form contains: ame: full=dipeptidyl peptidase 4 soluble form ame: full=dipeptidyl peptidase iv soluble form	1652	gi|52001458|sp|P22411.3|DPP4_PIGRecName: Full=Dipeptidyl peptidase 4; AltName: Full=Dipeptidyl peptidase IV; Short=DPP IV; AltName: Full=T-cell activation antigen CD26; AltName: CD_antigen=CD26; Contains: RecName: Full=Dipeptidyl peptidase 4 membrane form; AltName: Full=Dipeptidyl peptidase IV membrane form; Contains: RecName: Full=Dipeptidyl peptidase 4 soluble form; AltName: Full=Dipeptidyl pep…	P22411	1.22006e-71	60	271.166	374	228
THRIPS_11_08_2011_01870	mig15_caeel ame: full=serine threonine-protein kinase mig-15 ame: full=abnormal cell migration protein 15	5195	gi|67477462|sp|Q23356.3|MIG15_CAEELRecName: Full=Serine/threonine-protein kinase mig-15; AltName: Full=Abnormal cell migration protein 15	Q23356	7.54683e-164	69	579.326	521	360
THRIPS_11_08_2011_01871	conserved hypothetical protein [Pediculus humanus corporis]	287	gi|242014442|ref|XP_002427900.1|conserved hypothetical protein [Pediculus humanus corporis] >gi|242017311|ref|XP_002429133.1| conserved hypothetical protein [Pediculus humanus corporis] >gi|212512369|gb|EEB15162.1| conserved hypothetical protein [Pediculus humanus corporis] >gi|212514006|gb|EEB16395.1| conserved hypothetical protein [Pediculus humanus corporis]	XP_002427900	1.3986e-06	80	56.225	35	28
THRIPS_11_08_2011_01872	co024_danre ame: full=upf0480 protein c15orf24 homolog flags: precursor	1747	gi|82079472|sp|Q5TYV0.1|CO024_DANRERecName: Full=UPF0480 protein C15orf24 homolog; Flags: Precursor	Q5TYV0	2.74729e-45	65	183.726	206	134
THRIPS_11_08_2011_01873	dmxl2_human ame: full= -like protein 2 ame: full=rabconnectin-3	6835	gi|296434481|sp|Q8TDJ6.2|DMXL2_HUMANRecName: Full=DmX-like protein 2; AltName: Full=Rabconnectin-3	Q8TDJ6	0	55	961.444	1601	882
THRIPS_11_08_2011_01874	pairb_human ame: full=plasminogen activator inhibitor 1 rna-binding protein ame: full=pai1 rna-binding protein 1 short=pai-rbp1 ame: full=serpine1 mrna-binding protein 1	3098	gi|52783206|sp|Q8NC51.2|PAIRB_HUMANRecName: Full=Plasminogen activator inhibitor 1 RNA-binding protein; AltName: Full=PAI1 RNA-binding protein 1; Short=PAI-RBP1; AltName: Full=SERPINE1 mRNA-binding protein 1	Q8NC51	4.84561e-14	53	80.8777	149	80
THRIPS_11_08_2011_01878	pard3_human ame: full=partitioning defective 3 homolog short=par-3 short=pard-3 ame: full=atypical pkc isotype-specific-interacting protein short=asip ame: full=ctcl tumor antigen se2-5 ame: full=par3-alpha	2287	gi|30913162|sp|Q8TEW0.2|PARD3_HUMANRecName: Full=Partitioning defective 3 homolog; Short=PAR-3; Short=PARD-3; AltName: Full=Atypical PKC isotype-specific-interacting protein; Short=ASIP; AltName: Full=CTCL tumor antigen se2-5; AltName: Full=PAR3-alpha	Q8TEW0	1.29386e-61	49	238.424	552	272
THRIPS_11_08_2011_01880	adt1_anoga ame: full= carrier protein 1 ame: full=adp atp translocase 1 ame: full=adenine nucleotide translocator 1 short=ant 1	1447	gi|92090585|sp|Q27238.2|ADT1_ANOGARecName: Full=ADP,ATP carrier protein 1; AltName: Full=ADP/ATP translocase 1; AltName: Full=Adenine nucleotide translocator 1; Short=ANT 1	Q27238	1.7369e-135	89	483.026	295	263
THRIPS_11_08_2011_01882	sc24b_human ame: full=protein transport protein sec24b ame: full=sec24-related protein b	6059	gi|218511774|sp|O95487.2|SC24B_HUMANRecName: Full=Protein transport protein Sec24B; AltName: Full=SEC24-related protein B	O95487	0	71	860.136	851	606
THRIPS_11_08_2011_01883	cytsa_danre ame: full=cytospin-a-a ame: full=specc1-like protein	2878	gi|223590186|sp|Q2KN93.2|CYTSA_DANRERecName: Full=Cytospin-A-A; AltName: Full=SPECC1-like protein	Q2KN93	8.34849e-53	52	209.534	431	228
THRIPS_11_08_2011_01884	homeodomain-interacting protein kinase 2	7494	gi|242003285|ref|XP_002422680.1|hipk, putative [Pediculus humanus corporis] >gi|212505502|gb|EEB09942.1| hipk, putative [Pediculus humanus corporis]	XP_002422680	1.98456e-31	77	144.436	104	81
THRIPS_11_08_2011_01885	sc24c_human ame: full=protein transport protein sec24c ame: full=sec24-related protein c	10543	gi|257051070|sp|P53992.3|SC24C_HUMANRecName: Full=Protein transport protein Sec24C; AltName: Full=SEC24-related protein C	P53992	0	64	952.584	1017	661
THRIPS_11_08_2011_01887	epn2_rat ame: full=epsin-2 ame: full=eps-15-interacting protein 2	4184	gi|41016936|sp|Q9Z1Z3.1|EPN2_RATRecName: Full=Epsin-2; AltName: Full=EPS-15-interacting protein 2	Q9Z1Z3	5.22484e-75	54	283.878	579	317
THRIPS_11_08_2011_01888	f26_ranca ame: full=6-phosphofructo-2-kinase fructose- -biphosphatase short=6pf-2-k fru- -p2ase short=pfk fbpase ame: full=6pf-2-k fru- -p2ase liver muscle isozymes includes: ame: full=6-phosphofructo-2-kinase includes: ame: full=fructose- -bisphosphatase	4629	gi|2499509|sp|Q91309.1|F26_RANCARecName: Full=6-phosphofructo-2-kinase/fructose-2,6-biphosphatase; Short=6PF-2-K/Fru-2,6-P2ase; Short=PFK/FBPase; AltName: Full=6PF-2-K/Fru-2,6-P2ase liver/muscle isozymes; Includes: RecName: Full=6-phosphofructo-2-kinase; Includes: RecName: Full=Fructose-2,6-bisphosphatase	Q91309	3.21712e-158	80	560.451	418	336
THRIPS_11_08_2011_01889	mll3_human ame: full=histone-lysine n-methyltransferase mll3 ame: full=homologous to alr protein ame: full=lysine n-methyltransferase 2c short=kmt2c ame: full=myeloid lymphoid or mixed-lineage leukemia protein 3	2902	gi|221222521|sp|Q8NEZ4.3|MLL3_HUMANRecName: Full=Histone-lysine N-methyltransferase MLL3; AltName: Full=Homologous to ALR protein; AltName: Full=Lysine N-methyltransferase 2C; Short=KMT2C; AltName: Full=Myeloid/lymphoid or mixed-lineage leukemia protein 3	Q8NEZ4	7.81614e-83	52	309.301	437	231
THRIPS_11_08_2011_01890	txnd5_mouse ame: full=thioredoxin domain-containing protein 5 ame: full=endoplasmic reticulum resident protein 46 short=er protein 46 short=erp46 ame: full=plasma cell-specific thioredoxin-related protein short=pc-trp ame: full=thioredoxin-like protein p46 flags: precursor	2381	gi|29839593|sp|Q91W90.2|TXND5_MOUSERecName: Full=Thioredoxin domain-containing protein 5; AltName: Full=Endoplasmic reticulum resident protein 46; Short=ER protein 46; Short=ERp46; AltName: Full=Plasma cell-specific thioredoxin-related protein; Short=PC-TRP; AltName: Full=Thioredoxin-like protein p46; Flags: Precursor	Q91W90	2.31172e-94	61	250.366	268	165
THRIPS_11_08_2011_01892	aim21_klula ame: full=altered inheritance of mitochondria protein 21	1751	gi|74606330|sp|Q6CQX5.1|AIM21_KLULARecName: Full=Altered inheritance of mitochondria protein 21	Q6CQX5	7.0986e-09	38	62.7734	368	143
THRIPS_11_08_2011_01893	erd2_drome ame: full=er lumen protein retaining receptor	2353	gi|6685412|sp|O76767.1|ERD2_DROMERecName: Full=ER lumen protein retaining receptor	O76767	1.36366e-98	91	361.303	212	195
THRIPS_11_08_2011_01896	cytochrome p450-like tbp protein	208	gi|110740129|dbj|BAF01964.1|hypothetical protein [Arabidopsis thaliana]	BAF01964	1.28661e-10	72	61.2326	48	35
THRIPS_11_08_2011_01898	mppa_mouse ame: full=mitochondrial-processing peptidase subunit alpha ame: full=alpha-mpp ame: full=p-55 flags: precursor	623	gi|14548120|sp|Q9DC61.1|MPPA_MOUSERecName: Full=Mitochondrial-processing peptidase subunit alpha; AltName: Full=Alpha-MPP; AltName: Full=P-55; Flags: Precursor	Q9DC61	6.18013e-59	73	226.868	200	147
THRIPS_11_08_2011_01899	hypothetical protein ECU11_1800 [Encephalitozoon cuniculi GB-M1]	205	gi|19074980|ref|NP_586486.1|hypothetical protein ECU11_1800 [Encephalitozoon cuniculi GB-M1] >gi|19069705|emb|CAD26090.1| hypothetical protein [Encephalitozoon cuniculi GB-M1]	NP_586486	3.26976e-16	88	88.1965	52	46
THRIPS_11_08_2011_01900	ubp30_xentr ame: full=ubiquitin carboxyl-terminal hydrolase 30 ame: full=deubiquitinating enzyme 30 ame: full=ubiquitin thiolesterase 30 ame: full=ubiquitin-specific-processing protease 30 short=ub-specific protease 30	777	gi|239977639|sp|A4QNN3.1|UBP30_XENTRRecName: Full=Ubiquitin carboxyl-terminal hydrolase 30; AltName: Full=Deubiquitinating enzyme 30; AltName: Full=Ubiquitin thiolesterase 30; AltName: Full=Ubiquitin-specific-processing protease 30; Short=Ub-specific protease 30	A4QNN3	5.79296e-29	51	127.872	226	116
THRIPS_11_08_2011_01903	hot_aedae ame: full=probable hydroxyacid-oxoacid mitochondrial short=hot flags: precursor	288	gi|122106603|sp|Q17EN4.1|HOT_AEDAERecName: Full=Probable hydroxyacid-oxoacid transhydrogenase, mitochondrial; Short=HOT; Flags: Precursor	Q17EN4	2.06826e-28	86	124.02	93	80
THRIPS_11_08_2011_01908	gmds_drome ame: full=gdp-mannose dehydratase ame: full=gdp-d-mannose dehydratase short=dm-gmd	203	gi|33302635|sp|Q9VMW9.2|GMDS_DROMERecName: Full=GDP-mannose 4,6 dehydratase; AltName: Full=GDP-D-mannose dehydratase; Short=Dm-gmd	Q9VMW9	2.03526e-23	92	107.457	67	62
THRIPS_11_08_2011_01909	dag1_bovin ame: full=dystroglycan ame: full=dystrophin-associated glycoprotein 1 contains: ame: full=alpha-dystroglycan short=alpha-dg contains: ame: full=beta-dystroglycan short=beta-dg flags: precursor	1496	gi|6225236|sp|O18738.1|DAG1_BOVINRecName: Full=Dystroglycan; AltName: Full=Dystrophin-associated glycoprotein 1; Contains: RecName: Full=Alpha-dystroglycan; Short=Alpha-DG; Contains: RecName: Full=Beta-dystroglycan; Short=Beta-DG; Flags: Precursor	O18738	2.87925e-24	49	113.62	276	137
THRIPS_11_08_2011_01913	tbl3_bovin ame: full=transducin beta-like protein 3	703	gi|122136230|sp|Q2KJJ5.1|TBL3_BOVINRecName: Full=Transducin beta-like protein 3	Q2KJJ5	4.69398e-24	63	111.309	163	104
THRIPS_11_08_2011_01917	rnc_caeel ame: full=ribonuclease 3 ame: full=protein drosher ame: full=ribonuclease iii short=rnase iii	204	gi|20141625|sp|O01326.2|RNC_CAEELRecName: Full=Ribonuclease 3; AltName: Full=Protein drosher; AltName: Full=Ribonuclease III; Short=RNase III	O01326	5.02466e-14	91	76.2554	57	52
THRIPS_11_08_2011_01921	host cell factor	306	gi|307210243|gb|EFN86893.1|Host cell factor [Harpegnathos saltator]	EFN86893	4.7974e-08	65	40.817	47	31
THRIPS_11_08_2011_01922	my61f_drome ame: full=myosin-ib short=mib ame: full=brush border myosin ib short=bbmib	924	gi|41019509|sp|Q23979.3|MY61F_DROMERecName: Full=Myosin-IB; Short=MIB; AltName: Full=Brush border myosin IB; Short=BBMIB	Q23979	1.45464e-120	80	432.565	312	250
THRIPS_11_08_2011_01928	lrp2_rat ame: full=low-density lipoprotein receptor-related protein 2 short=lrp-2 ame: full=glycoprotein 330 short=gp330 ame: full=megalin flags: precursor	5642	gi|1708867|sp|P98158.1|LRP2_RATRecName: Full=Low-density lipoprotein receptor-related protein 2; Short=LRP-2; AltName: Full=Glycoprotein 330; Short=gp330; AltName: Full=Megalin; Flags: Precursor	P98158	0	58	1479.15	1911	1120
THRIPS_11_08_2011_01933	utp20_human ame: full=small subunit processome component 20 homolog ame: full=down-regulated in metastasis protein ame: full=novel nucleolar protein 73 short=nnp73 ame: full=protein key-1a6	519	gi|296452999|sp|O75691.3|UTP20_HUMANRecName: Full=Small subunit processome component 20 homolog; AltName: Full=Down-regulated in metastasis protein; AltName: Full=Novel nucleolar protein 73; Short=NNP73; AltName: Full=Protein Key-1A6	O75691	1.38071e-09	59	62.3882	76	45
THRIPS_11_08_2011_01936	k0141_human ame: full=uncharacterized protein mitochondrial flags: precursor	2266	gi|116242599|sp|Q14154.3|K0141_HUMANRecName: Full=Uncharacterized protein KIAA0141, mitochondrial; Flags: Precursor	Q14154	2.07489e-11	53	71.633	139	75
THRIPS_11_08_2011_01940	k1797_human ame: full=uncharacterized protein kiaa1797	262	gi|74747342|sp|Q5VW36.1|K1797_HUMANRecName: Full=Uncharacterized protein KIAA1797	Q5VW36	3.40557e-07	62	53.5286	86	54
THRIPS_11_08_2011_01943	ccar1_human ame: full=cell division cycle and apoptosis regulator protein 1 ame: full=cell cycle and apoptosis regulatory protein 1 short=carp-1 ame: full=death inducer with sap domain	791	gi|94707499|sp|Q8IX12.2|CCAR1_HUMANRecName: Full=Cell division cycle and apoptosis regulator protein 1; AltName: Full=Cell cycle and apoptosis regulatory protein 1; Short=CARP-1; AltName: Full=Death inducer with SAP domain	Q8IX12	3.40366e-24	86	112.079	68	59
THRIPS_11_08_2011_01946	probable g-protein coupled receptor 158	638	gi|307212326|gb|EFN88130.1|Probable G-protein coupled receptor 158 [Harpegnathos saltator]	EFN88130	6.51432e-109	93	397.127	212	199
THRIPS_11_08_2011_01949	ada10_mouse ame: full=disintegrin and metalloproteinase domain-containing protein 10 short=adam 10 ame: full=kuzbanian protein homolog ame: full=mammalian disintegrin-metalloprotease ame: cd_antigen=cd156c flags: precursor	206	gi|29839749|sp|O35598.1|ADA10_MOUSERecName: Full=Disintegrin and metalloproteinase domain-containing protein 10; Short=ADAM 10; AltName: Full=Kuzbanian protein homolog; AltName: Full=Mammalian disintegrin-metalloprotease; AltName: CD_antigen=CD156c; Flags: Precursor	O35598	1.27392e-17	75	88.1965	64	48
THRIPS_11_08_2011_01955	adas_human ame: full=alkyldihydroxyacetonephosphate peroxisomal short=alkyl-dhap synthase ame: full=aging-associated gene 5 protein ame: full=alkylglycerone-phosphate synthase flags: precursor	243	gi|2498106|sp|O00116.1|ADAS_HUMANRecName: Full=Alkyldihydroxyacetonephosphate synthase, peroxisomal; Short=Alkyl-DHAP synthase; AltName: Full=Aging-associated gene 5 protein; AltName: Full=Alkylglycerone-phosphate synthase; Flags: Precursor	O00116	2.23934e-22	75	103.99	82	62
THRIPS_11_08_2011_01956	adck3_human ame: full=chaperone activity of bc1 complex- mitochondrial short=chaperone-abc1-like ame: full=aarf domain-containing protein kinase 3 flags: precursor	205	gi|27923741|sp|Q8NI60.1|ADCK3_HUMANRecName: Full=Chaperone activity of bc1 complex-like, mitochondrial; Short=Chaperone-ABC1-like; AltName: Full=aarF domain-containing protein kinase 3; Flags: Precursor	Q8NI60	1.08169e-16	79	85.1149	67	53
THRIPS_11_08_2011_01964	rpa1_drome ame: full=dna-directed rna polymerase i subunit rpa1 short=rna polymerase i subunit a1 ame: full=dna-directed rna polymerase i largest subunit ame: full=dna-directed rna polymerase i subunit a	738	gi|56405368|sp|P91875.2|RPA1_DROMERecName: Full=DNA-directed RNA polymerase I subunit RPA1; Short=RNA polymerase I subunit A1; AltName: Full=DNA-directed RNA polymerase I largest subunit; AltName: Full=DNA-directed RNA polymerase I subunit A	P91875	1.81635e-85	82	315.464	228	189
THRIPS_11_08_2011_01967	chdm_drome ame: full=chromodomain-helicase-dna-binding protein mi-2 homolog ame: full=atp-dependent helicase mi-2 short=dmi-2	1213	gi|13124018|sp|O97159.2|CHDM_DROMERecName: Full=Chromodomain-helicase-DNA-binding protein Mi-2 homolog; AltName: Full=ATP-dependent helicase Mi-2; Short=dMi-2	O97159	1.19348e-155	77	549.666	413	319
THRIPS_11_08_2011_01969	ptn9_mouse ame: full=tyrosine-protein phosphatase non-receptor type 9 ame: full=protein-tyrosine phosphatase meg2 short=ptpase meg2	910	gi|85701215|sp|O35239.2|PTN9_MOUSERecName: Full=Tyrosine-protein phosphatase non-receptor type 9; AltName: Full=Protein-tyrosine phosphatase MEG2; Short=PTPase MEG2	O35239	3.24527e-24	74	112.464	94	70
THRIPS_11_08_2011_01970	pkhf2_chick ame: full=pleckstrin homology domain-containing family f member 2 short=ph domain-containing family f member 2	1199	gi|82233927|sp|Q5ZLY5.1|PKHF2_CHICKRecName: Full=Pleckstrin homology domain-containing family F member 2; Short=PH domain-containing family F member 2	Q5ZLY5	7.50824e-94	85	344.354	221	188
THRIPS_11_08_2011_01971	zfpl1_nemve ame: full=zinc finger 1 homolog	342	gi|193806675|sp|A7S7Z9.1|ZFPL1_NEMVERecName: Full=Zinc finger protein-like 1 homolog	A7S7Z9	4.23639e-21	97	99.7525	48	47
THRIPS_11_08_2011_01974	ptf1a_human ame: full=pancreas transcription factor 1 subunit alpha ame: full=class a basic helix-loop-helix protein 29 short=bhlha29 ame: full=pancreas-specific transcription factor 1a ame: full=bhlh transcription factor p48 ame: full=p48 dna-binding subunit of transcription factor ptf1 short=ptf1-p48	624	gi|74749931|sp|Q7RTS3.1|PTF1A_HUMANRecName: Full=Pancreas transcription factor 1 subunit alpha; AltName: Full=Class A basic helix-loop-helix protein 29; Short=bHLHa29; AltName: Full=Pancreas-specific transcription factor 1a; AltName: Full=bHLH transcription factor p48; AltName: Full=p48 DNA-binding subunit of transcription factor PTF1; Short=PTF1-p48	Q7RTS3	2.08617e-06	51	52.373	114	59
THRIPS_11_08_2011_01976	srrt_aedae ame: full=serrate rna effector molecule homolog ame: full=arsenite-resistance protein 2 homolog	396	gi|122095165|sp|Q17FR9.1|SRRT_AEDAERecName: Full=Serrate RNA effector molecule homolog; AltName: Full=Arsenite-resistance protein 2 homolog	Q17FR9	3.25624e-21	79	100.138	77	61
THRIPS_11_08_2011_01978	cn166_mouse ame: full=upf0568 protein c14orf166 homolog	361	gi|20137942|sp|Q9CQE8.1|CN166_MOUSERecName: Full=UPF0568 protein C14orf166 homolog	Q9CQE8	2.19984e-22	61	103.99	119	73
THRIPS_11_08_2011_01980	ddx18_drome ame: full=probable atp-dependent rna helicase pitchoune	778	gi|33860195|sp|Q9VD51.2|DDX18_DROMERecName: Full=Probable ATP-dependent RNA helicase pitchoune	Q9VD51	1.25512e-124	91	445.662	258	235
THRIPS_11_08_2011_01989	krh2_drome ame: full=protein kr-h2	2783	gi|10720068|sp|Q9V447.1|KRH2_DROMERecName: Full=Protein Kr-h2	Q9V447	3.14951e-57	70	224.172	231	164
THRIPS_11_08_2011_01990	ampe_bovin ame: full=glutamyl aminopeptidase short=eap ame: full=aminopeptidase a short=ap-a ame: cd_antigen=cd249	582	gi|122138816|sp|Q32LQ0.1|AMPE_BOVINRecName: Full=Glutamyl aminopeptidase; Short=EAP; AltName: Full=Aminopeptidase A; Short=AP-A; AltName: CD_antigen=CD249	Q32LQ0	7.57185e-21	54	100.138	189	103
THRIPS_11_08_2011_01997	ci046_human ame: full=transmembrane protein c9orf46	473	gi|68565305|sp|Q9HBL7.1|CI046_HUMANRecName: Full=Transmembrane protein C9orf46	Q9HBL7	1.10327e-06	67	52.373	55	37
THRIPS_11_08_2011_01998	aldo-keto reductase	201	gi|189235748|ref|XP_967327.2|PREDICTED: similar to aldo-keto reductase [Tribolium castaneum]	XP_967327	7.0787e-11	77	70.4774	58	45
THRIPS_11_08_2011_01999	efr3_drome ame: full=protein efr3 homolog cmp44e ame: full=conserved membrane protein at 44e ame: full=protein stambha a	374	gi|134034969|sp|Q8IGJ0.3|EFR3_DROMERecName: Full=Protein EFR3 homolog cmp44E; AltName: Full=Conserved membrane protein at 44E; AltName: Full=Protein stambha A	Q8IGJ0	2.16133e-25	70	114.005	126	89
THRIPS_11_08_2011_02001	rspb_ecoli ame: full=starvation-sensing protein rspb	380	gi|585952|sp|P38105.1|RSPB_ECOLIRecName: Full=Starvation-sensing protein rspB	P38105	1.14049e-18	58	91.6633	122	71
THRIPS_11_08_2011_02006	itpk1_chick ame: full=inositol-tetrakisphosphate 1-kinase ame: full=inositol -trisphosphate 5 6-kinase short=inositol-triphosphate 5 6-kinase short=ins( )p 5 6-kinase	250	gi|82075444|sp|Q5F480.1|ITPK1_CHICKRecName: Full=Inositol-tetrakisphosphate 1-kinase; AltName: Full=Inositol 1,3,4-trisphosphate 5/6-kinase; Short=Inositol-triphosphate 5/6-kinase; Short=Ins(1,3,4)P(3) 5/6-kinase	Q5F480	1.39823e-24	82	111.309	84	69
THRIPS_11_08_2011_02009	usp9x_mouse ame: full=probable ubiquitin carboxyl-terminal hydrolase faf-x ame: full=deubiquitinating enzyme faf-x ame: full=fat facets homolog ame: full=fat facets x-linked ame: full=ubiquitin carboxyl-terminal hydrolase fam ame: full=ubiquitin thiolesterase faf-x ame: full=ubiquitin-specific protease x chromosome ame: full=ubiquitin-specific-processing protease faf-x	974	gi|2501465|sp|P70398.1|USP9X_MOUSERecName: Full=Probable ubiquitin carboxyl-terminal hydrolase FAF-X; AltName: Full=Deubiquitinating enzyme FAF-X; AltName: Full=Fat facets homolog; AltName: Full=Fat facets protein-related, X-linked; AltName: Full=Ubiquitin carboxyl-terminal hydrolase FAM; AltName: Full=Ubiquitin thiolesterase FAF-X; AltName: Full=Ubiquitin-specific protease 9, X chromosome; AltNa…	P70398	6.63966e-79	70	294.278	257	180
THRIPS_11_08_2011_02012	rl27a_tenmo ame: full=60s ribosomal protein l27a	222	gi|2500273|sp|Q27021.1|RL27A_TENMORecName: Full=60S ribosomal protein L27a	Q27021	8.13253e-17	94	85.5001	73	69
THRIPS_11_08_2011_02016	mdn1_dicdi ame: full=midasin ame: full=midas-containing protein	988	gi|223635327|sp|Q869L3.2|MDN1_DICDIRecName: Full=Midasin; AltName: Full=MIDAS-containing protein	Q869L3	7.64069e-06	40	51.6026	237	96
THRIPS_11_08_2011_02017	nf1_rat ame: full=neurofibromin ame: full=neurofibromatosis-related protein nf-1	206	gi|13959414|sp|P97526.1|NF1_RATRecName: Full=Neurofibromin; AltName: Full=Neurofibromatosis-related protein NF-1	P97526	1.72175e-14	75	77.7962	68	51
THRIPS_11_08_2011_02019	ubp20_bovin ame: full=ubiquitin carboxyl-terminal hydrolase 20 ame: full=deubiquitinating enzyme 20 ame: full=ubiquitin thiolesterase 20 ame: full=ubiquitin-specific-processing protease 20	603	gi|281312476|sp|A7Z056.1|UBP20_BOVINRecName: Full=Ubiquitin carboxyl-terminal hydrolase 20; AltName: Full=Deubiquitinating enzyme 20; AltName: Full=Ubiquitin thiolesterase 20; AltName: Full=Ubiquitin-specific-processing protease 20	A7Z056	1.67796e-74	74	278.485	214	159
THRIPS_11_08_2011_02022	ercc3_drome ame: full=dna excision repair protein haywire ame: full=atp-dependent dna helicase hay ame: full=ercc-3 homolog protein ame: full=ercc3dm	482	gi|68068031|sp|Q02870.2|ERCC3_DROMERecName: Full=DNA excision repair protein haywire; AltName: Full=ATP-dependent DNA helicase hay; AltName: Full=ERCC-3 homolog protein; AltName: Full=ERCC3Dm	Q02870	6.57928e-34	75	142.895	132	100
THRIPS_11_08_2011_02025	fxl20_mouse ame: full=f-box lrr-repeat protein 20 ame: full=f-box and leucine-rich repeat protein 20 ame: full=f-box lrr-repeat protein 2-like	277	gi|166898079|sp|Q9CZV8.3|FXL20_MOUSERecName: Full=F-box/LRR-repeat protein 20; AltName: Full=F-box and leucine-rich repeat protein 20; AltName: Full=F-box/LRR-repeat protein 2-like	Q9CZV8	6.77196e-11	79	65.855	48	38
THRIPS_11_08_2011_02028	mk67i_xentr ame: full=mki67 fha domain-interacting nucleolar phospho	1020	gi|71151922|sp|Q6GL69.1|MK67I_XENTRRecName: Full=MKI67 FHA domain-interacting nucleolar phosphoprotein-like	Q6GL69	1.3159e-32	56	140.584	217	123
THRIPS_11_08_2011_02031	atbd4_danre ame: full=atp-binding domain-containing protein 4	1337	gi|143955279|sp|A2RV01.1|ATBD4_DANRERecName: Full=ATP-binding domain-containing protein 4	A2RV01	3.38586e-79	79	167.548	124	99
THRIPS_11_08_2011_02034	tutl_drome ame: full=protein turtle	243	gi|158706513|sp|Q967D7.2|TUTL_DROMERecName: Full=Protein turtle	Q967D7	1.00601e-30	91	131.724	80	73
THRIPS_11_08_2011_02035	traf6_bovin ame: full=tnf receptor-associated factor 6 ame: full=e3 ubiquitin-protein ligase traf6	221	gi|122146515|sp|Q3ZCC3.1|TRAF6_BOVINRecName: Full=TNF receptor-associated factor 6; AltName: Full=E3 ubiquitin-protein ligase TRAF6	Q3ZCC3	3.42473e-07	56	53.5286	72	41
THRIPS_11_08_2011_02037	ptp10_drome ame: full=tyrosine-protein phosphatase 10d ame: full=receptor-linked protein-tyrosine phosphatase 10d short=dptp10d flags: precursor	1164	gi|73920744|sp|P35992.3|PTP10_DROMERecName: Full=Tyrosine-protein phosphatase 10D; AltName: Full=Receptor-linked protein-tyrosine phosphatase 10D; Short=DPTP10D; Flags: Precursor	P35992	1.62153e-163	87	531.561	331	289
THRIPS_11_08_2011_02038	ttc3_human ame: full=e3 ubiquitin-protein ligase ttc3 ame: full=protein dcrr1 ame: full=ring finger protein 105 ame: full=tpr repeat protein d ame: full=tetratricopeptide repeat protein 3 short=tpr repeat protein 3	675	gi|1730008|sp|P53804.1|TTC3_HUMANRecName: Full=E3 ubiquitin-protein ligase TTC3; AltName: Full=Protein DCRR1; AltName: Full=RING finger protein 105; AltName: Full=TPR repeat protein D; AltName: Full=Tetratricopeptide repeat protein 3; Short=TPR repeat protein 3	P53804	7.28306e-11	52	67.3958	85	45
THRIPS_11_08_2011_02039	ce033_rat ame: full=upf0465 protein c5orf33 homolog	2581	gi|123778635|sp|Q1HCL7.1|CE033_RATRecName: Full=UPF0465 protein C5orf33 homolog	Q1HCL7	8.10215e-84	66	312.383	386	257
THRIPS_11_08_2011_02042	dnaj1_drome ame: full= protein homolog 1 short=droj1	2110	gi|13124719|sp|Q24133.3|DNAJ1_DROMERecName: Full=DnaJ protein homolog 1; Short=DROJ1	Q24133	5.0455e-97	71	355.91	341	244
THRIPS_11_08_2011_02044	ndus4_gecja ame: full=nadh dehydrogenase iron-sulfur protein mitochondrial ame: full=complex i-18 kda short=ci-18 kda ame: full=nadh-ubiquinone oxidoreductase 18 kda subunit flags: precursor	699	gi|82084052|sp|Q66XS7.1|NDUS4_GECJARecName: Full=NADH dehydrogenase [ubiquinone] iron-sulfur protein 4, mitochondrial; AltName: Full=Complex I-18 kDa; Short=CI-18 kDa; AltName: Full=NADH-ubiquinone oxidoreductase 18 kDa subunit; Flags: Precursor	Q66XS7	8.51486e-42	66	170.244	161	107
THRIPS_11_08_2011_02046	nu1m_anoqu ame: full=nadh-ubiquinone oxidoreductase chain 1 ame: full=nadh dehydrogenase subunit 1	1057	gi|462750|sp|P33502.1|NU1M_ANOQURecName: Full=NADH-ubiquinone oxidoreductase chain 1; AltName: Full=NADH dehydrogenase subunit 1	P33502	7.67894e-15	66	81.6481	103	68
THRIPS_11_08_2011_02047	rl8_mambr ame: full=60s ribosomal protein l8	828	gi|51701882|sp|Q6RYS3.1|RL8_MAMBRRecName: Full=60S ribosomal protein L8 >gi|51701898|sp|Q95V39.1|RL8_SPOFR RecName: Full=60S ribosomal protein L8	Q6RYS3	5.32407e-116	84	417.157	256	216
THRIPS_11_08_2011_02048	syt3_mouse ame: full=synaptotagmin-3 ame: full=synaptotagmin iii short=	1049	gi|33112638|sp|O35681.2|SYT3_MOUSERecName: Full=Synaptotagmin-3; AltName: Full=Synaptotagmin III; Short=SytIII	O35681	6.21597e-09	45	62.003	149	68
THRIPS_11_08_2011_02049	cdk9a_xenla ame: full=cell division protein kinase 9-a ame: full=cyclin-dependent kinase 9-a	609	gi|82225932|sp|Q4V862.1|CDK9A_XENLARecName: Full=Cell division protein kinase 9-A; AltName: Full=Cyclin-dependent kinase 9-A	Q4V862	3.25957e-09	80	61.6178	42	34
THRIPS_11_08_2011_02053	glcm_mouse ame: full=glucosylceramidase ame: full=acid beta-glucosidase ame: full=beta-glucocerebrosidase ame: full=d-glucosyl-n-acylsphingosine glucohydrolase flags: precursor	1307	gi|121284|sp|P17439.1|GLCM_MOUSERecName: Full=Glucosylceramidase; AltName: Full=Acid beta-glucosidase; AltName: Full=Beta-glucocerebrosidase; AltName: Full=D-glucosyl-N-acylsphingosine glucohydrolase; Flags: Precursor	P17439	1.07191e-88	60	327.405	408	245
THRIPS_11_08_2011_02054	svil_mouse ame: full=supervillin ame: full=archvillin ame: full=p205 p250	4629	gi|57013084|sp|Q8K4L3.1|SVIL_MOUSERecName: Full=Supervillin; AltName: Full=Archvillin; AltName: Full=p205/p250	Q8K4L3	0	54	526.939	910	498
THRIPS_11_08_2011_02055	cgl_pig ame: full=cystathionine gamma-lyase ame: full=gamma-cystathionase	1434	gi|122143720|sp|Q19QT7.1|CGL_PIGRecName: Full=Cystathionine gamma-lyase; AltName: Full=Gamma-cystathionase	Q19QT7	1.61218e-133	75	476.478	378	285
THRIPS_11_08_2011_02056	glyr1_aedae ame: full= oxidoreductase glyr1 homolog ame: full=glyoxylate reductase 1 homolog ame: full=nuclear protein np60 homolog	1895	gi|122094584|sp|Q175F8.1|GLYR1_AEDAERecName: Full=Putative oxidoreductase GLYR1 homolog; AltName: Full=Glyoxylate reductase 1 homolog; AltName: Full=Nuclear protein NP60 homolog	Q175F8	3.04784e-138	67	492.656	528	358
THRIPS_11_08_2011_02058	hypothetical protein IscW_ISCW019942 [Ixodes scapularis]	1941	gi|241561155|ref|XP_002401087.1|hypothetical protein IscW_ISCW019942 [Ixodes scapularis] >gi|215499805|gb|EEC09299.1| hypothetical protein IscW_ISCW019942 [Ixodes scapularis]	XP_002401087	1.49521e-11	56	76.2554	104	59
THRIPS_11_08_2011_02059	mast2_human ame: full=microtubule-associated serine threonine-protein kinase 2	1144	gi|62287152|sp|Q6P0Q8.2|MAST2_HUMANRecName: Full=Microtubule-associated serine/threonine-protein kinase 2	Q6P0Q8	5.2631e-81	68	301.597	382	261
THRIPS_11_08_2011_02060	rgnef_human ame: full=rho-guanine nucleotide exchange factor ame: full=190 kda guanine nucleotide exchange factor short=p190- short=p190	1518	gi|172046113|sp|Q8N1W1.2|RGNEF_HUMANRecName: Full=Rho-guanine nucleotide exchange factor; AltName: Full=190 kDa guanine nucleotide exchange factor; Short=p190-RhoGEF; Short=p190RhoGEF	Q8N1W1	6.07439e-54	66	212.231	278	184
THRIPS_11_08_2011_02061	vdac_drome ame: full=voltage-dependent anion-selective channel ame: full= ame: full=porin	1481	gi|6174942|sp|Q94920.3|VDAC_DROMERecName: Full=Voltage-dependent anion-selective channel; AltName: Full=DmVDAC; AltName: Full=Porin	Q94920	2.13534e-88	75	326.635	279	212
THRIPS_11_08_2011_02063	hfw1_drome ame: full=protein halfway ame: full=protein singed wings flags: precursor	1727	gi|56404674|sp|Q9W568.3|HFW1_DROMERecName: Full=Protein halfway; AltName: Full=Protein singed wings; Flags: Precursor	Q9W568	1.71631e-63	69	193.741	207	143
THRIPS_11_08_2011_02064	atpd_mouse ame: full=atp synthase subunit mitochondrial ame: full=f-atpase delta subunit flags: precursor	804	gi|78099820|sp|Q9D3D9.1|ATPD_MOUSERecName: Full=ATP synthase subunit delta, mitochondrial; AltName: Full=F-ATPase delta subunit; Flags: Precursor	Q9D3D9	1.41897e-25	78	116.701	95	75
THRIPS_11_08_2011_02069	p34_human ame: full=alpha- and gamma-adaptin-binding protein p34	380	gi|62286981|sp|Q6PD74.1|P34_HUMANRecName: Full=Alpha- and gamma-adaptin-binding protein p34	Q6PD74	1.39416e-16	60	84.7297	100	60
THRIPS_11_08_2011_02070	scfd2_mouse ame: full=sec1 family domain-containing protein 2 ame: full=neuronal sec1 ame: full=syntaxin-binding protein 1-like 1	351	gi|51338674|sp|Q8BTY8.1|SCFD2_MOUSERecName: Full=Sec1 family domain-containing protein 2; AltName: Full=Neuronal Sec1; AltName: Full=Syntaxin-binding protein 1-like 1	Q8BTY8	2.62906e-07	49	53.9138	113	56
THRIPS_11_08_2011_02075	pr38b_mouse ame: full=pre-mrna-splicing factor 38b	1340	gi|81912708|sp|Q80SY5.1|PR38B_MOUSERecName: Full=Pre-mRNA-splicing factor 38B	Q80SY5	1.35268e-70	80	267.314	235	190
THRIPS_11_08_2011_02076	u520_drome ame: full= u5 small nuclear ribonucleoprotein 200 kda helicase	916	gi|33112469|sp|Q9VUV9.4|U520_DROMERecName: Full=Putative U5 small nuclear ribonucleoprotein 200 kDa helicase	Q9VUV9	3.16538e-138	90	323.553	200	181
THRIPS_11_08_2011_02078	rs2_drome ame: full=40s ribosomal protein s2 ame: full=protein strings of pearls	925	gi|730652|sp|P31009.2|RS2_DROMERecName: Full=40S ribosomal protein S2; AltName: Full=Protein strings of pearls	P31009	2.47979e-104	94	378.637	222	210
THRIPS_11_08_2011_02082	wipi4_mouse ame: full=wd repeat domain phosphoinositide-interacting protein 4 short=wipi-4 ame: full=wd repeat domain x-linked 1 ame: full=wd repeat-containing protein 45	971	gi|81916087|sp|Q91VM3.1|WIPI4_MOUSERecName: Full=WD repeat domain phosphoinositide-interacting protein 4; Short=WIPI-4; AltName: Full=WD repeat domain X-linked 1; AltName: Full=WD repeat-containing protein 45	Q91VM3	5.2843e-44	79	178.333	123	98
THRIPS_11_08_2011_02084	glucose dehydrogenase	396	gi|156551742|ref|XP_001601971.1|PREDICTED: similar to CG12398-PA [Nasonia vitripennis]	XP_001601971	1.1403e-16	77	89.7373	70	54
THRIPS_11_08_2011_02085	mtx2_pig ame: full=metaxin-2 ame: full=mitochondrial outer membrane import complex protein 2	737	gi|90101415|sp|Q2L969.1|MTX2_PIGRecName: Full=Metaxin-2; AltName: Full=Mitochondrial outer membrane import complex protein 2	Q2L969	1.18438e-72	72	150.984	129	94
THRIPS_11_08_2011_02086	bat5_ponab ame: full=protein bat5 ame: full=hla-b-associated transcript 5	422	gi|75041298|sp|Q5R6S0.1|BAT5_PONABRecName: Full=Protein BAT5; AltName: Full=HLA-B-associated transcript 5	Q5R6S0	8.21782e-44	78	175.252	140	110
THRIPS_11_08_2011_02087	bat5_rat ame: full=protein bat5 ame: full=hla-b-associated transcript 5	813	gi|81884895|sp|Q6MG55.1|BAT5_RATRecName: Full=Protein BAT5; AltName: Full=HLA-B-associated transcript 5	Q6MG55	9.51609e-54	57	210.305	276	160
THRIPS_11_08_2011_02088	s35b4_drome ame: full=udp-xylose and udp-n-acetylglucosamine transporter-like	1838	gi|74872614|sp|Q9W429.1|S35B4_DROMERecName: Full=UDP-xylose and UDP-N-acetylglucosamine transporter-like	Q9W429	9.26007e-90	77	325.094	307	238
THRIPS_11_08_2011_02089	rs24_spofr ame: full=40s ribosomal protein s24	437	gi|20140134|sp|Q962Q6.1|RS24_SPOFRRecName: Full=40S ribosomal protein S24	Q962Q6	3.34935e-43	92	147.517	97	90
THRIPS_11_08_2011_02091	ans1b_rat ame: full=ankyrin repeat and sterile alpha motif domain-containing protein 1b ame: full=amyloid-beta protein intracellular domain-associated protein 1 short=aida-1 ame: full=e2a-pbx1-associated protein short=eb-1	466	gi|182627486|sp|P0C6S7.1|ANS1B_RATRecName: Full=Ankyrin repeat and sterile alpha motif domain-containing protein 1B; AltName: Full=Amyloid-beta protein intracellular domain-associated protein 1; Short=AIDA-1; AltName: Full=E2A-PBX1-associated protein; Short=EB-1	P0C6S7	2.41779e-06	63	51.2174	57	36
THRIPS_11_08_2011_02092	dyhc_drome ame: full=dynein heavy cytoplasmic ame: full=dynein heavy cytosolic short=dyhc	2908	gi|56405335|sp|P37276.2|DYHC_DROMERecName: Full=Dynein heavy chain, cytoplasmic; AltName: Full=Dynein heavy chain, cytosolic; Short=DYHC	P37276	0	87	1455.66	969	852
THRIPS_11_08_2011_02093	mcfd2_human ame: full=multiple coagulation factor deficiency protein 2 ame: full=neural stem cell-derived neuronal survival protein flags: precursor	2940	gi|49036425|sp|Q8NI22.1|MCFD2_HUMANRecName: Full=Multiple coagulation factor deficiency protein 2; AltName: Full=Neural stem cell-derived neuronal survival protein; Flags: Precursor >gi|75070658|sp|Q5R8Z6.1|MCFD2_PONAB RecName: Full=Multiple coagulation factor deficiency protein 2 homolog; Flags: Precursor	Q8NI22	9.24028e-15	58	83.1889	113	66
THRIPS_11_08_2011_02094	sws_droan ame: full=neuropathy target esterase sws ame: full=swiss cheese	2495	gi|269969672|sp|B3MRI9.1|SWS_DROANRecName: Full=Neuropathy target esterase sws; AltName: Full=Swiss cheese	B3MRI9	0	78	856.67	678	530
THRIPS_11_08_2011_02096	syq_drome ame: full=probable glutaminyl-trna synthetase ame: full=glutamine--trna ligase short=	2558	gi|12643524|sp|Q9Y105.1|SYQ_DROMERecName: Full=Probable glutaminyl-tRNA synthetase; AltName: Full=Glutamine--tRNA ligase; Short=GlnRS	Q9Y105	0	75	969.148	779	587
THRIPS_11_08_2011_02098	rpn2_ponab ame: full=dolichyl-diphosphooligosaccharide--protein glycosyltransferase subunit 2 ame: full=dolichyl-diphosphooligosaccharide--protein glycosyltransferase 63 kda subunit ame: full=ribophorin ii short=rpn-ii ame: full=ribophorin-2 flags: precursor	2448	gi|75042051|sp|Q5RBM1.1|RPN2_PONABRecName: Full=Dolichyl-diphosphooligosaccharide--protein glycosyltransferase subunit 2; AltName: Full=Dolichyl-diphosphooligosaccharide--protein glycosyltransferase 63 kDa subunit; AltName: Full=Ribophorin II; Short=RPN-II; AltName: Full=Ribophorin-2; Flags: Precursor	Q5RBM1	1.0271e-88	56	328.561	581	326
THRIPS_11_08_2011_02099	calub_salsa ame: full=calumenin-b flags: precursor	2197	gi|224487682|sp|B5X4E0.1|CALUB_SALSARecName: Full=Calumenin-B; Flags: Precursor	B5X4E0	6.92024e-97	72	355.525	315	227
THRIPS_11_08_2011_02100	mpi_bovin ame: full=mannose-6-phosphate isomerase ame: full=phosphohexomutase ame: full=phosphomannose isomerase short=pmi	2803	gi|110279041|sp|Q3SZI0.3|MPI_BOVINRecName: Full=Mannose-6-phosphate isomerase; AltName: Full=Phosphohexomutase; AltName: Full=Phosphomannose isomerase; Short=PMI	Q3SZI0	1.74565e-105	67	318.161	323	218
THRIPS_11_08_2011_02101	cg15926 cg15926-pa	2851	gi|193702233|ref|XP_001947914.1|PREDICTED: similar to CG15926 CG15926-PA [Acyrthosiphon pisum]	XP_001947914	4.4452e-10	74	72.0182	63	47
THRIPS_11_08_2011_02102	gcn1l_human ame: full=translational activator gcn1 short= 1 ame: full=gcn1-like protein 1	2398	gi|296439506|sp|Q92616.6|GCN1L_HUMANRecName: Full=Translational activator GCN1; Short=HsGCN1; AltName: Full=GCN1-like protein 1	Q92616	1.62901e-124	61	285.804	435	266
THRIPS_11_08_2011_02103	sec13_human ame: full=protein sec13 homolog ame: full=sec13-like protein 1 ame: full=sec13-related protein	2611	gi|50403748|sp|P55735.3|SEC13_HUMANRecName: Full=Protein SEC13 homolog; AltName: Full=SEC13-like protein 1; AltName: Full=SEC13-related protein	P55735	7.34215e-125	78	448.743	322	254
THRIPS_11_08_2011_02104	xpot_ponab ame: full=exportin-t ame: full=exportin ame: full=trna exportin	5171	gi|75041808|sp|Q5RA02.1|XPOT_PONABRecName: Full=Exportin-T; AltName: Full=Exportin(tRNA); AltName: Full=tRNA exportin	Q5RA02	1.32856e-152	57	541.962	929	537
THRIPS_11_08_2011_02105	dop1_drome ame: full=protein dopey-1 homolog	7048	gi|156630498|sp|A1ZBE8.1|DOP1_DROMERecName: Full=Protein dopey-1 homolog	A1ZBE8	9.05527e-168	51	592.808	1189	615
THRIPS_11_08_2011_02106	sik3_mouse ame: full=serine threonine-protein kinase sik3 ame: full=salt-inducible kinase 3 short=sik-3 ame: full=serine threonine-protein kinase qsk	7119	gi|115502239|sp|Q6P4S6.3|SIK3_MOUSERecName: Full=Serine/threonine-protein kinase SIK3; AltName: Full=Salt-inducible kinase 3; Short=SIK-3; AltName: Full=Serine/threonine-protein kinase QSK	Q6P4S6	1.74639e-126	54	455.677	746	404
THRIPS_11_08_2011_02107	dyhc_drome ame: full=dynein heavy cytoplasmic ame: full=dynein heavy cytosolic short=dyhc	7740	gi|56405335|sp|P37276.2|DYHC_DROMERecName: Full=Dynein heavy chain, cytoplasmic; AltName: Full=Dynein heavy chain, cytosolic; Short=DYHC	P37276	0	92	4465.6	2580	2393
THRIPS_11_08_2011_02108	rab14_mouse ame: full=ras-related protein rab-14	4926	gi|46577103|sp|Q91V41.3|RAB14_MOUSERecName: Full=Ras-related protein Rab-14 >gi|75054939|sp|Q5R8Z8.3|RAB14_PONAB RecName: Full=Ras-related protein Rab-14 >gi|75571353|sp|Q5ZKU5.3|RAB14_CHICK RecName: Full=Ras-related protein Rab-14 >gi|85700392|sp|P61106.4|RAB14_HUMAN RecName: Full=Ras-related protein Rab-14	Q91V41	5.96422e-102	90	373.629	217	197
THRIPS_11_08_2011_02109	acon_caeel ame: full=probable aconitate mitochondrial short=aconitase ame: full=citrate hydro-lyase flags: precursor	6584	gi|21264394|sp|P34455.2|ACON_CAEELRecName: Full=Probable aconitate hydratase, mitochondrial; Short=Aconitase; AltName: Full=Citrate hydro-lyase; Flags: Precursor	P34455	0	86	1160.98	754	650
THRIPS_11_08_2011_02110	PREDICTED: gtf2ird2-like [Danio rerio]	4288	gi|292624240|ref|XP_002665589.1|PREDICTED: gtf2ird2-like [Danio rerio]	XP_002665589	1.45413e-07	46	64.3142	216	101
THRIPS_11_08_2011_02111	isoform a	2188	gi|170050787|ref|XP_001861468.1|sinuous [Culex quinquefasciatus] >gi|167872270|gb|EDS35653.1| sinuous [Culex quinquefasciatus]	XP_001861468	7.15589e-66	81	256.914	215	176
THRIPS_11_08_2011_02112	atpb2_drome ame: full=sodium potassium-transporting atpase subunit beta-2 ame: full=protein nervana 2 ame: full=sodium potassium-dependent atpase subunit beta-2	2293	gi|12643737|sp|Q24048.2|ATPB2_DROMERecName: Full=Sodium/potassium-transporting ATPase subunit beta-2; AltName: Full=Protein nervana 2; AltName: Full=Sodium/potassium-dependent ATPase subunit beta-2	Q24048	3.07978e-79	63	296.975	310	197
THRIPS_11_08_2011_02113	prp8_mouse ame: full=pre-mrna-processing-splicing factor 8 ame: full=splicing factor prp8	3909	gi|269849633|sp|Q99PV0.2|PRP8_MOUSERecName: Full=Pre-mRNA-processing-splicing factor 8; AltName: Full=Splicing factor Prp8	Q99PV0	0	98	2169.82	1096	1084
THRIPS_11_08_2011_02114	uap1_mouse ame: full=udp-n-acetylhexosamine pyrophosphorylase includes: ame: full=udp-n-acetylgalactosamine pyrophosphorylase includes: ame: full=udp-n-acetylglucosamine pyrophosphorylase	3015	gi|68566143|sp|Q91YN5.1|UAP1_MOUSERecName: Full=UDP-N-acetylhexosamine pyrophosphorylase; Includes: RecName: Full=UDP-N-acetylgalactosamine pyrophosphorylase; Includes: RecName: Full=UDP-N-acetylglucosamine pyrophosphorylase	Q91YN5	8.28416e-128	68	458.759	431	295
THRIPS_11_08_2011_02115	y816_drome ame: full=uncharacterized protein cg7816	3212	gi|12585532|sp|Q9VAF0.1|Y816_DROMERecName: Full=Uncharacterized protein CG7816	Q9VAF0	6.04457e-84	63	313.153	367	233
THRIPS_11_08_2011_02118	dna polymerase v	3521	gi|156537125|ref|XP_001603225.1|PREDICTED: similar to DNA polymerase v [Nasonia vitripennis]	XP_001603225	8.47862e-83	54	313.923	604	330
THRIPS_11_08_2011_02119	mmp17_human ame: full=matrix metalloproteinase-17 short=mmp-17 ame: full=membrane-type matrix metalloproteinase 4 short=mt-mmp 4 short=mtmmp4 ame: full=membrane-type-4 matrix metalloproteinase short=mt4-mmp short=mt4mmp flags: precursor	1835	gi|296439485|sp|Q9ULZ9.4|MMP17_HUMANRecName: Full=Matrix metalloproteinase-17; Short=MMP-17; AltName: Full=Membrane-type matrix metalloproteinase 4; Short=MT-MMP 4; Short=MTMMP4; AltName: Full=Membrane-type-4 matrix metalloproteinase; Short=MT4-MMP; Short=MT4MMP; Flags: Precursor	Q9ULZ9	2.92266e-29	55	130.568	180	100
THRIPS_11_08_2011_02120	cdkl1_human ame: full=cyclin-dependent kinase-like 1 ame: full=protein kinase p42 kkialre ame: full=serine threonine-protein kinase kkialre	319	gi|229463050|sp|Q00532.5|CDKL1_HUMANRecName: Full=Cyclin-dependent kinase-like 1; AltName: Full=Protein kinase p42 KKIALRE; AltName: Full=Serine/threonine-protein kinase KKIALRE	Q00532	7.63401e-23	57	105.531	106	61
THRIPS_11_08_2011_02121	bnip3_human ame: full=bcl2 adenovirus e1b 19 kda protein-interacting protein 3	2240	gi|20532402|sp|Q12983.2|BNIP3_HUMANRecName: Full=BCL2/adenovirus E1B 19 kDa protein-interacting protein 3	Q12983	6.15823e-08	48	60.077	161	78
THRIPS_11_08_2011_02124	uggg_drome ame: full=udp-glucose:glycoprotein glucosyltransferase short=ugt short=dugt ame: full=udp--glc:glycoprotein glucosyltransferase flags: precursor	5921	gi|67477397|sp|Q09332.2|UGGG_DROMERecName: Full=UDP-glucose:glycoprotein glucosyltransferase; Short=UGT; Short=dUGT; AltName: Full=UDP--Glc:glycoprotein glucosyltransferase; Flags: Precursor	Q09332	0	70	1045.8	1079	756
THRIPS_11_08_2011_02125	symc_xenla ame: full=methionyl-trna cytoplasmic ame: full=methionine--trna ligase short=	1524	gi|82187134|sp|Q6PF21.1|SYMC_XENLARecName: Full=Methionyl-tRNA synthetase, cytoplasmic; AltName: Full=Methionine--tRNA ligase; Short=MetRS	Q6PF21	4.86052e-35	60	149.443	184	111
THRIPS_11_08_2011_02126	isoform a	1769	gi|307198673|gb|EFN79509.1|Trinucleotide repeat-containing gene 6C protein [Harpegnathos saltator]	EFN79509	2.09678e-65	75	254.988	300	226
THRIPS_11_08_2011_02129	pard3_mouse ame: full=partitioning defective 3 homolog short=par-3 short=pard-3 ame: full=atypical pkc isotype-specific-interacting protein short=asip ame: full=ephrin-interacting protein short=phip	1961	gi|215273904|sp|Q99NH2.2|PARD3_MOUSERecName: Full=Partitioning defective 3 homolog; Short=PAR-3; Short=PARD-3; AltName: Full=Atypical PKC isotype-specific-interacting protein; Short=ASIP; AltName: Full=Ephrin-interacting protein; Short=PHIP	Q99NH2	9.27843e-13	57	75.8702	120	69
THRIPS_11_08_2011_02133	tln1_mouse ame: full=talin-1	1944	gi|135290|sp|P26039.1|TLN1_MOUSERecName: Full=Talin-1	P26039	0	76	663.3	560	430
THRIPS_11_08_2011_02134	titin_drome ame: full=titin ame: full=d-titin ame: full=kettin	1196	gi|172045934|sp|Q9I7U4.3|TITIN_DROMERecName: Full=Titin; AltName: Full=D-Titin; AltName: Full=Kettin	Q9I7U4	2.00567e-30	75	133.65	113	85
THRIPS_11_08_2011_02136	rs23_papda ame: full=40s ribosomal protein s23	954	gi|52000789|sp|Q6EV23.1|RS23_PAPDARecName: Full=40S ribosomal protein S23 >gi|54039497|sp|Q962Q7.1|RS23_SPOFR RecName: Full=40S ribosomal protein S23	Q6EV23	1.94884e-75	98	282.722	143	141
THRIPS_11_08_2011_02137	hsp7d_manse ame: full=heat shock 70 kda protein cognate 4 short=hsc 70-4	2188	gi|12585261|sp|Q9U639.1|HSP7D_MANSERecName: Full=Heat shock 70 kDa protein cognate 4; Short=Hsc 70-4	Q9U639	0	96	1051.58	609	589
THRIPS_11_08_2011_02142	rnf44_rat ame: full=ring finger protein 44	1763	gi|81908627|sp|Q4V7B8.1|RNF44_RATRecName: Full=RING finger protein 44	Q4V7B8	5.80332e-43	77	176.022	135	104
THRIPS_11_08_2011_02144	protein hairless	360	gi|242008561|ref|XP_002425071.1|hypothetical protein Phum_PHUM171800 [Pediculus humanus corporis] >gi|212508736|gb|EEB12333.1| hypothetical protein Phum_PHUM171800 [Pediculus humanus corporis]	XP_002425071	8.26536e-12	65	73.559	98	64
THRIPS_11_08_2011_02146	pelet_drome ame: full=transposable element p transposase short=p-element transposase	599	gi|88926256|sp|Q7M3K2.2|PELET_DROMERecName: Full=Transposable element P transposase; Short=P-element transposase	Q7M3K2	1.46421e-06	53	52.7582	94	50
THRIPS_11_08_2011_02154	psa4_drome ame: full=proteasome subunit alpha type-4 ame: full=pros-dm29 ame: full=proteasome 29 kda subunit	209	gi|12643270|sp|P18053.2|PSA4_DROMERecName: Full=Proteasome subunit alpha type-4; AltName: Full=PROS-Dm29; AltName: Full=Proteasome 29 kDa subunit	P18053	1.27007e-17	97	88.1965	44	43
THRIPS_11_08_2011_02155	1-acyl-sn-glycerol-3-phosphate acyltransferase alpha	257	gi|66564398|ref|XP_624521.1|PREDICTED: similar to CG3812-PA, isoform A [Apis mellifera]	XP_624521	1.65062e-07	57	59.3066	78	45
THRIPS_11_08_2011_02159	ccng1_ponab ame: full=cyclin-g1	3542	gi|73619915|sp|Q5R5D0.1|CCNG1_PONABRecName: Full=Cyclin-G1	Q5R5D0	1.42321e-25	48	119.398	326	157
THRIPS_11_08_2011_02166	glym_human ame: full=serine mitochondrial short=shmt ame: full=glycine hydroxymethyltransferase ame: full=serine methylase flags: precursor	213	gi|6226865|sp|P34897.3|GLYM_HUMANRecName: Full=Serine hydroxymethyltransferase, mitochondrial; Short=SHMT; AltName: Full=Glycine hydroxymethyltransferase; AltName: Full=Serine methylase; Flags: Precursor	P34897	1.54672e-07	68	54.6842	60	41
THRIPS_11_08_2011_02167	spz1b_wheat ame: full=serpin-z1b ame: full= 1b ame: full=wsz1b ame: full=wzs2	211	gi|75279910|sp|P93693.1|SPZ1B_WHEATRecName: Full=Serpin-Z1B; AltName: Full=TriaeZ1b; AltName: Full=WSZ1b; AltName: Full=WZS2	P93693	6.9641e-08	61	55.8398	68	42
THRIPS_11_08_2011_02170	choline phosphate cytidylyltransferase	211	gi|19074770|ref|NP_586276.1|CHOLINE PHOSPHATE CYTIDYLYLTRANSFERASE [Encephalitozoon cuniculi GB-M1] >gi|19069412|emb|CAD25880.1| CHOLINE PHOSPHATE CYTIDYLYLTRANSFERASE [Encephalitozoon cuniculi GB-M1]	NP_586276	8.5194e-17	85	90.1225	63	54
THRIPS_11_08_2011_02172	s2544_mouse ame: full=solute carrier family 25 member 44	211	gi|81896010|sp|Q8BGF9.1|S2544_MOUSERecName: Full=Solute carrier family 25 member 44	Q8BGF9	8.7892e-11	65	65.4698	67	44
THRIPS_11_08_2011_02173	ntpes_bacsu ame: full=trifunctional nucleotide phosphoesterase protein yfkn includes: ame: full=2 -cyclic-nucleotide 2 -phosphodiesterase 3 -nucleotidase includes: ame: full=5 -nucleotidase flags: precursor	321	gi|81342290|sp|O34313.1|NTPES_BACSURecName: Full=Trifunctional nucleotide phosphoesterase protein yfkN; Includes: RecName: Full=2',3'-cyclic-nucleotide 2'-phosphodiesterase/3'-nucleotidase; Includes: RecName: Full=5'-nucleotidase; Flags: Precursor	O34313	1.82547e-08	57	57.7658	99	57
THRIPS_11_08_2011_02180	sld5_rat ame: full=dna replication complex gins protein sld5 ame: full=gins complex subunit 4	222	gi|123781672|sp|Q499W2.1|SLD5_RATRecName: Full=DNA replication complex GINS protein SLD5; AltName: Full=GINS complex subunit 4	Q499W2	4.03309e-08	68	56.6102	61	42
THRIPS_11_08_2011_02183	stim_drome ame: full=stromal interaction molecule homolog flags: precursor	232	gi|17368342|sp|P83094.1|STIM_DROMERecName: Full=Stromal interaction molecule homolog; Flags: Precursor	P83094	2.19617e-17	76	87.4261	67	51
THRIPS_11_08_2011_02186	adcy9_mouse ame: full=adenylate cyclase type 9 ame: full=atp pyrophosphate-lyase 9 ame: full=adenylate cyclase type ix ame: full=adenylyl cyclase 9 ame: full=adenylyl cyclase type 10 short=actp10	258	gi|1706220|sp|P51830.1|ADCY9_MOUSERecName: Full=Adenylate cyclase type 9; AltName: Full=ATP pyrophosphate-lyase 9; AltName: Full=Adenylate cyclase type IX; AltName: Full=Adenylyl cyclase 9; AltName: Full=Adenylyl cyclase type 10; Short=ACTP10	P51830	2.8922e-06	82	50.447	35	29
THRIPS_11_08_2011_02188	kelc_drome ame: full=ring canal kelch protein contains: ame: full=kelch short protein	280	gi|182628298|sp|Q04652.4|KELC_DROMERecName: Full=Ring canal kelch protein; Contains: RecName: Full=Kelch short protein	Q04652	1.07366e-32	92	138.272	90	83
THRIPS_11_08_2011_02190	low-density lipoprotein	306	gi|242018517|ref|XP_002429721.1|low-density lipoprotein receptor, putative [Pediculus humanus corporis] >gi|212514727|gb|EEB16983.1| low-density lipoprotein receptor, putative [Pediculus humanus corporis]	XP_002429721	1.41278e-11	55	72.7886	104	58
THRIPS_11_08_2011_02195	atg7_chick ame: full=ubiquitin-like modifier-activating enzyme atg7 ame: full=atg12-activating enzyme e1 atg7 ame: full=autophagy-related protein 7 short=apg7-like	269	gi|62286613|sp|Q5ZKY2.1|ATG7_CHICKRecName: Full=Ubiquitin-like modifier-activating enzyme ATG7; AltName: Full=ATG12-activating enzyme E1 ATG7; AltName: Full=Autophagy-related protein 7; Short=APG7-like	Q5ZKY2	3.74329e-17	68	86.6557	82	56
THRIPS_11_08_2011_02197	dep domain-containing protein 5	269	gi|270013445|gb|EFA09893.1|hypothetical protein TcasGA2_TC012042 [Tribolium castaneum]	EFA09893	8.61029e-17	93	90.1225	45	42
THRIPS_11_08_2011_02201	prdx6_rat ame: full=peroxiredoxin-6 ame: full=1-cys peroxiredoxin short=1-cys prx ame: full=acidic calcium-independent phospholipase a2 short=aipla2 ame: full=antioxidant protein 2 ame: full=non-selenium glutathione peroxidase short=nsgpx ame: full=thiol-specific antioxidant protein	662	gi|5902791|sp|O35244.3|PRDX6_RATRecName: Full=Peroxiredoxin-6; AltName: Full=1-Cys peroxiredoxin; Short=1-Cys PRX; AltName: Full=Acidic calcium-independent phospholipase A2; Short=aiPLA2; AltName: Full=Antioxidant protein 2; AltName: Full=Non-selenium glutathione peroxidase; Short=NSGPx; AltName: Full=Thiol-specific antioxidant protein	O35244	2.16801e-36	72	152.14	139	101
THRIPS_11_08_2011_02203	cell wall-associated hydrolase	309	gi|189353841|ref|YP_001949468.1|cell wall-associated hydrolase [Burkholderia multivorans ATCC 17616] >gi|189337863|dbj|BAG46932.1| cell wall-associated hydrolase [Burkholderia multivorans ATCC 17616]	YP_001949468	8.23292e-20	76	100.138	71	54
THRIPS_11_08_2011_02209	nucleolar pre-ribosomal-associated protein 1	291	gi|307183187|gb|EFN70096.1|Nucleolar pre-ribosomal-associated protein 1 [Camponotus floridanus]	EFN70096	4.78962e-07	57	57.7658	91	52
THRIPS_11_08_2011_02222	dcr1b_mouse ame: full=5 exonuclease apollo ame: full=dna cross-link repair 1b protein ame: full=snm1 homolog b	295	gi|73620758|sp|Q8C7W7.2|DCR1B_MOUSERecName: Full=5' exonuclease Apollo; AltName: Full=DNA cross-link repair 1B protein; AltName: Full=SNM1 homolog B	Q8C7W7	3.64374e-09	56	60.077	74	42
THRIPS_11_08_2011_02225	suf_drome ame: full=protein suppressor of forked	291	gi|126302604|sp|P25991.2|SUF_DROMERecName: Full=Protein suppressor of forked	P25991	4.03645e-24	68	109.768	97	66
THRIPS_11_08_2011_02240	cox1_chobi ame: full=cytochrome c oxidase subunit 1 ame: full=cytochrome c oxidase polypeptide i	3765	gi|115502375|sp|P50668.2|COX1_CHOBIRecName: Full=Cytochrome c oxidase subunit 1; AltName: Full=Cytochrome c oxidase polypeptide I	P50668	4.73281e-144	81	513.072	467	382
THRIPS_11_08_2011_02241	cox3_parli ame: full=cytochrome c oxidase subunit 3 ame: full=cytochrome c oxidase polypeptide iii	501	gi|117072|sp|P12702.1|COX3_PARLIRecName: Full=Cytochrome c oxidase subunit 3; AltName: Full=Cytochrome c oxidase polypeptide III	P12702	3.09689e-53	78	207.223	157	123
THRIPS_11_08_2011_02242	lap4_drome ame: full=protein lap4 ame: full=protein scribble ame: full=protein smell-impaired	5923	gi|51701662|sp|Q7KRY7.1|LAP4_DROMERecName: Full=Protein lap4; AltName: Full=Protein scribble; AltName: Full=Protein smell-impaired	Q7KRY7	0	81	673.315	503	408
THRIPS_11_08_2011_02243	so5a1_human ame: full=solute carrier organic anion transporter family member 5a1 ame: full=organic anion transporter polypeptide-related protein 4 short=oatp-rp4 short=oatprp4 ame: full=solute carrier family 21 member 15	4048	gi|296452911|sp|Q9H2Y9.2|SO5A1_HUMANRecName: Full=Solute carrier organic anion transporter family member 5A1; AltName: Full=Organic anion transporter polypeptide-related protein 4; Short=OATP-RP4; Short=OATPRP4; AltName: Full=Solute carrier family 21 member 15	Q9H2Y9	1.04826e-80	55	302.753	406	227
THRIPS_11_08_2011_02244	predicted protein [Populus trichocarpa]	2588	gi|224151085|ref|XP_002337056.1|predicted protein [Populus trichocarpa] >gi|222837928|gb|EEE76293.1| predicted protein [Populus trichocarpa]	XP_002337056	1.6922e-85	98	322.398	154	151
THRIPS_11_08_2011_02245	so5a1_human ame: full=solute carrier organic anion transporter family member 5a1 ame: full=organic anion transporter polypeptide-related protein 4 short=oatp-rp4 short=oatprp4 ame: full=solute carrier family 21 member 15	4169	gi|296452911|sp|Q9H2Y9.2|SO5A1_HUMANRecName: Full=Solute carrier organic anion transporter family member 5A1; AltName: Full=Organic anion transporter polypeptide-related protein 4; Short=OATP-RP4; Short=OATPRP4; AltName: Full=Solute carrier family 21 member 15	Q9H2Y9	3.66951e-129	57	463.766	660	379
THRIPS_11_08_2011_02246	so5a1_human ame: full=solute carrier organic anion transporter family member 5a1 ame: full=organic anion transporter polypeptide-related protein 4 short=oatp-rp4 short=oatprp4 ame: full=solute carrier family 21 member 15	4444	gi|296452911|sp|Q9H2Y9.2|SO5A1_HUMANRecName: Full=Solute carrier organic anion transporter family member 5A1; AltName: Full=Organic anion transporter polypeptide-related protein 4; Short=OATP-RP4; Short=OATPRP4; AltName: Full=Solute carrier family 21 member 15	Q9H2Y9	1.03112e-129	57	465.692	666	382
THRIPS_11_08_2011_02253	conserved hypothetical protein [Pediculus humanus corporis]	267	gi|242009491|ref|XP_002425519.1|conserved hypothetical protein [Pediculus humanus corporis] >gi|212509374|gb|EEB12781.1| conserved hypothetical protein [Pediculus humanus corporis]	XP_002425519	6.63134e-09	60	63.929	70	42
THRIPS_11_08_2011_02254	venom protein r-like protein	579	gi|239787122|ref|NP_001155164.1|venom protein R [Nasonia vitripennis]	NP_001155164	1.95995e-07	61	59.6918	93	57
THRIPS_11_08_2011_02255	venom protein r-like protein	703	gi|239787122|ref|NP_001155164.1|venom protein R [Nasonia vitripennis]	NP_001155164	3.05228e-07	61	59.6918	93	57
THRIPS_11_08_2011_02256	abca5_human ame: full=atp-binding cassette sub-family a member 5	10053	gi|115503762|sp|Q8WWZ7.2|ABCA5_HUMANRecName: Full=ATP-binding cassette sub-family A member 5	Q8WWZ7	0	50	666.381	1782	908
THRIPS_11_08_2011_02257	abca5_human ame: full=atp-binding cassette sub-family a member 5	4669	gi|115503762|sp|Q8WWZ7.2|ABCA5_HUMANRecName: Full=ATP-binding cassette sub-family A member 5	Q8WWZ7	1.47781e-110	55	402.134	855	475
THRIPS_11_08_2011_02258	abca5_human ame: full=atp-binding cassette sub-family a member 5	7794	gi|115503762|sp|Q8WWZ7.2|ABCA5_HUMANRecName: Full=ATP-binding cassette sub-family A member 5	Q8WWZ7	1.70007e-74	53	283.108	526	279
THRIPS_11_08_2011_02259	abca5_human ame: full=atp-binding cassette sub-family a member 5	10088	gi|115503762|sp|Q8WWZ7.2|ABCA5_HUMANRecName: Full=ATP-binding cassette sub-family A member 5	Q8WWZ7	3.25996e-110	55	402.134	855	475
THRIPS_11_08_2011_02260	alf_drome ame: full=fructose-bisphosphate aldolase	1937	gi|543797|sp|P07764.5|ALF_DROMERecName: Full=Fructose-bisphosphate aldolase	P07764	4.64746e-158	85	558.525	363	311
THRIPS_11_08_2011_02261	alf_drome ame: full=fructose-bisphosphate aldolase	1569	gi|543797|sp|P07764.5|ALF_DROMERecName: Full=Fructose-bisphosphate aldolase	P07764	9.15216e-162	86	570.466	364	314
THRIPS_11_08_2011_02262	alf_drome ame: full=fructose-bisphosphate aldolase	1940	gi|543797|sp|P07764.5|ALF_DROMERecName: Full=Fructose-bisphosphate aldolase	P07764	4.65637e-158	85	558.525	363	311
THRIPS_11_08_2011_02263	gdia_ponpy ame: full=rab gdp dissociation inhibitor alpha short=rab gdi alpha ame: full=guanosine diphosphate dissociation inhibitor 1 short=gdi-1	6164	gi|48428025|sp|Q7YQM0.1|GDIA_PONPYRecName: Full=Rab GDP dissociation inhibitor alpha; Short=Rab GDI alpha; AltName: Full=Guanosine diphosphate dissociation inhibitor 1; Short=GDI-1	Q7YQM0	2.89072e-178	82	627.476	440	363
THRIPS_11_08_2011_02265	arfg2_rat ame: full=adp-ribosylation factor gtpase-activating protein 2 short=arf gap 2 ame: full=gtpase-activating protein znf289 ame: full=zinc finger protein 289	3623	gi|123780788|sp|Q3MID3.1|ARFG2_RATRecName: Full=ADP-ribosylation factor GTPase-activating protein 2; Short=ARF GAP 2; AltName: Full=GTPase-activating protein ZNF289; AltName: Full=Zinc finger protein 289	Q3MID3	7.88085e-80	68	299.671	341	233
THRIPS_11_08_2011_02266	esyt2_human ame: full=extended synaptotagmin-2 short=e-syt2 ame: full=chr2syt	3554	gi|121949310|sp|A0FGR8.1|ESYT2_HUMANRecName: Full=Extended synaptotagmin-2; Short=E-Syt2; AltName: Full=Chr2Syt	A0FGR8	6.94371e-97	57	356.295	565	323
THRIPS_11_08_2011_02272	prod_drome ame: full=proline mitochondrial ame: full=proline oxidase ame: full=protein sluggish-a flags: precursor	4976	gi|73920742|sp|Q04499.2|PROD_DROMERecName: Full=Proline dehydrogenase, mitochondrial; AltName: Full=Proline oxidase; AltName: Full=Protein sluggish-A; Flags: Precursor	Q04499	0	80	751.51	598	481
THRIPS_11_08_2011_02274	hem1_ponab ame: full=5-aminolevulinate mitochondrial short=alas-h ame: full=5-aminolevulinic acid synthase 1 ame: full=delta-ala synthase 1 ame: full=delta-aminolevulinate synthase 1 flags: precursor	2670	gi|75061820|sp|Q5R9R9.1|HEM1_PONABRecName: Full=5-aminolevulinate synthase, nonspecific, mitochondrial; Short=ALAS-H; AltName: Full=5-aminolevulinic acid synthase 1; AltName: Full=Delta-ALA synthase 1; AltName: Full=Delta-aminolevulinate synthase 1; Flags: Precursor	Q5R9R9	2.16167e-156	76	553.518	438	333
THRIPS_11_08_2011_02275	ns1ba_danre ame: full=influenza virus ns1a-binding protein homolog a short=ns1-bp homolog a short=ns1-binding protein homolog a	5220	gi|75570772|sp|Q5RG82.1|NS1BA_DANRERecName: Full=Influenza virus NS1A-binding protein homolog A; Short=NS1-BP homolog A; Short=NS1-binding protein homolog A	Q5RG82	1.52907e-47	68	192.971	180	123
THRIPS_11_08_2011_02276	far1_arath ame: full=protein far-red impaired response 1	4655	gi|75213095|sp|Q9SWG3.1|FAR1_ARATHRecName: Full=Protein FAR-RED IMPAIRED RESPONSE 1	Q9SWG3	1.12034e-17	43	93.5893	321	139
THRIPS_11_08_2011_02280	retrotransposon protein	817	gi|149392583|gb|ABR26094.1|retrotransposon protein [Oryza sativa Indica Group]	ABR26094	1.04026e-42	93	100.908	49	46
THRIPS_11_08_2011_02281	retrotransposon protein	834	gi|149392583|gb|ABR26094.1|retrotransposon protein [Oryza sativa Indica Group]	ABR26094	3.25391e-48	92	109.768	56	52
THRIPS_11_08_2011_02282	conserved protein	581	gi|57013942|ref|YP_173415.1|hypothetical protein NitaMp073 [Nicotiana tabacum] >gi|56806578|dbj|BAD83479.1| hypothetical protein [Nicotiana tabacum]	YP_173415	5.14583e-16	51	88.1965	102	53
THRIPS_11_08_2011_02283	ygd6_schpo ame: full=zinc-type alcohol dehydrogenase-like protein	2799	gi|74582933|sp|O94564.1|YGD6_SCHPORecName: Full=Zinc-type alcohol dehydrogenase-like protein C1773.06c	O94564	3.43342e-11	44	71.2478	302	133
THRIPS_11_08_2011_02284	zinc-dependent alcohol dehydrogenase	2884	gi|307207218|gb|EFN85008.1|hypothetical protein EAI_17352 [Harpegnathos saltator]	EFN85008	8.27116e-119	83	233.032	161	135
THRIPS_11_08_2011_02285	PREDICTED: similar to GA15837-PA [Nasonia vitripennis]	1371	gi|156550372|ref|XP_001599366.1|PREDICTED: similar to GA15837-PA [Nasonia vitripennis]	XP_001599366	4.48121e-22	41	95.5153	292	120
THRIPS_11_08_2011_02286	isoform a	1530	gi|91079957|ref|XP_969398.1|PREDICTED: similar to GA11945-PA [Tribolium castaneum] >gi|270004601|gb|EFA01049.1| hypothetical protein TcasGA2_TC003965 [Tribolium castaneum]	XP_969398	9.12682e-29	42	112.849	349	148
THRIPS_11_08_2011_02290	rs14_drome ame: full=40s ribosomal protein s14	625	gi|133771|sp|P14130.1|RS14_DROMERecName: Full=40S ribosomal protein S14 >gi|74917201|sp|Q6XI08.1|RS14A_DROYA RecName: Full=40S ribosomal protein S14a	P14130	8.2507e-19	96	93.5893	50	48
THRIPS_11_08_2011_02293	pde4b_drome ame: full=camp-specific 3 -cyclic phosphodiesterase ame: full=learning memory process protein ame: full=protein dunce	5279	gi|73620981|sp|P12252.4|PDE4B_DROMERecName: Full=cAMP-specific 3',5'-cyclic phosphodiesterase; AltName: Full=Learning/memory process protein; AltName: Full=Protein dunce	P12252	0	82	906.36	630	520
THRIPS_11_08_2011_02295	mot10_danre ame: full=monocarboxylate transporter 10 short=mct 10 ame: full=solute carrier family 16 member 10	2426	gi|166218983|sp|A1L1W9.1|MOT10_DANRERecName: Full=Monocarboxylate transporter 10; Short=MCT 10; AltName: Full=Solute carrier family 16 member 10	A1L1W9	4.84329e-08	49	42.3578	61	30
THRIPS_11_08_2011_02296	perq2_mouse ame: full=perq amino acid-rich with gyf domain-containing protein 2 ame: full=grb10-interacting gyf protein 2 ame: full=trinucleotide repeat-containing gene 15 protein	7170	gi|122064904|sp|Q6Y7W8.2|PERQ2_MOUSERecName: Full=PERQ amino acid-rich with GYF domain-containing protein 2; AltName: Full=GRB10-interacting GYF protein 2; AltName: Full=Trinucleotide repeat-containing gene 15 protein	Q6Y7W8	2.87524e-44	42	182.57	638	272
THRIPS_11_08_2011_02302	son protein (negative regulatory element-binding protein) (nre-binding protein) (dbp-5) (bax antagonist selected in saccharomyces 1)	528	gi|110765984|ref|XP_001122986.1|PREDICTED: similar to SON protein (SON3) (Negative regulatory element-binding protein) (NRE-binding protein) (DBP-5) (Bax antagonist selected in saccharomyces 1) (BASS1) [Apis mellifera]	XP_001122986	2.78361e-06	48	55.4546	81	39
THRIPS_11_08_2011_02303	echa_human ame: full=trifunctional enzyme subunit mitochondrial ame: full=78 kda gastrin-binding protein ame: full=tp-alpha includes: ame: full=long-chain enoyl- hydratase includes: ame: full=long chain 3-hydroxyacyl- dehydrogenase flags: precursor	3114	gi|20141376|sp|P40939.2|ECHA_HUMANRecName: Full=Trifunctional enzyme subunit alpha, mitochondrial; AltName: Full=78 kDa gastrin-binding protein; AltName: Full=TP-alpha; Includes: RecName: Full=Long-chain enoyl-CoA hydratase; Includes: RecName: Full=Long chain 3-hydroxyacyl-CoA dehydrogenase; Flags: Precursor	P40939	0	74	726.857	709	526
THRIPS_11_08_2011_02305	ampm2_bovin ame: full=methionine aminopeptidase 2 short=map 2 short= 2 ame: full=peptidase m 2	2784	gi|110278814|sp|Q3ZC89.1|AMPM2_BOVINRecName: Full=Methionine aminopeptidase 2; Short=MAP 2; Short=MetAP 2; AltName: Full=Peptidase M 2	Q3ZC89	5.20712e-169	88	595.504	368	324
THRIPS_11_08_2011_02306	ampm2_bovin ame: full=methionine aminopeptidase 2 short=map 2 short= 2 ame: full=peptidase m 2	2335	gi|110278814|sp|Q3ZC89.1|AMPM2_BOVINRecName: Full=Methionine aminopeptidase 2; Short=MAP 2; Short=MetAP 2; AltName: Full=Peptidase M 2	Q3ZC89	4.25702e-169	88	595.504	368	324
THRIPS_11_08_2011_02307	piwl1_chick ame: full=piwi-like protein 1	651	gi|226701015|sp|A6N7Y9.1|PIWL1_CHICKRecName: Full=Piwi-like protein 1	A6N7Y9	6.21347e-73	74	273.478	216	160
THRIPS_11_08_2011_02308	ttc14_drome ame: full=tetratricopeptide repeat protein 14 homolog short=tpr repeat protein 14 homolog	3560	gi|75026928|sp|Q9VGU5.2|TTC14_DROMERecName: Full=Tetratricopeptide repeat protein 14 homolog; Short=TPR repeat protein 14 homolog	Q9VGU5	9.51214e-54	73	213.001	187	137
THRIPS_11_08_2011_02313	golp3_human ame: full=golgi phosphoprotein 3 ame: full=coat protein gpp34 ame: full=mitochondrial dna absence factor short=midas	4614	gi|50400651|sp|Q9H4A6.1|GOLP3_HUMANRecName: Full=Golgi phosphoprotein 3; AltName: Full=Coat protein GPP34; AltName: Full=Mitochondrial DNA absence factor; Short=MIDAS	Q9H4A6	1.84453e-105	82	385.185	298	246
THRIPS_11_08_2011_02316	dhsb_drome ame: full=succinate dehydrogenase iron-sulfur mitochondrial ame: full=iron-sulfur subunit of complex ii short=ip flags: precursor	1234	gi|729335|sp|P21914.2|DHSB_DROMERecName: Full=Succinate dehydrogenase [ubiquinone] iron-sulfur subunit, mitochondrial; AltName: Full=Iron-sulfur subunit of complex II; Short=Ip; Flags: Precursor	P21914	6.82769e-106	90	384.415	217	196
THRIPS_11_08_2011_02317	tpsa_dicdi ame: full= -trehalose-phosphate synthase a ame: full=trehalose-6-phosphate synthase a ame: full=udp-glucose-glucosephosphate glucosyltransferase a	2138	gi|74852969|sp|Q54K57.1|TPSA_DICDIRecName: Full=Alpha,alpha-trehalose-phosphate synthase [UDP-forming] A; AltName: Full=Trehalose-6-phosphate synthase A; AltName: Full=UDP-glucose-glucosephosphate glucosyltransferase A	Q54K57	3.22244e-91	51	336.65	656	339
THRIPS_11_08_2011_02320	utro_human ame: full=utrophin ame: full=dystrophin-related protein 1 short=drp-1	2482	gi|215274104|sp|P46939.2|UTRO_HUMANRecName: Full=Utrophin; AltName: Full=Dystrophin-related protein 1; Short=DRP-1	P46939	1.69709e-22	51	108.612	276	141
THRIPS_11_08_2011_02328	mlp1_drome ame: full=muscle lim protein 1	366	gi|1709057|sp|P53777.1|MLP1_DROMERecName: Full=Muscle LIM protein 1	P53777	8.57036e-30	87	128.642	81	71
THRIPS_11_08_2011_02333	ndub8_pantr ame: full=nadh dehydrogenase 1 beta subcomplex subunit mitochondrial ame: full=complex i-ashi short=ci-ashi ame: full=nadh-ubiquinone oxidoreductase ashi subunit flags: precursor	527	gi|115502325|sp|Q0MQE7.1|NDUB8_PANTRRecName: Full=NADH dehydrogenase [ubiquinone] 1 beta subcomplex subunit 8, mitochondrial; AltName: Full=Complex I-ASHI; Short=CI-ASHI; AltName: Full=NADH-ubiquinone oxidoreductase ASHI subunit; Flags: Precursor	Q0MQE7	1.14251e-11	42	69.3218	140	60
THRIPS_11_08_2011_02334	ndub8_bovin ame: full=nadh dehydrogenase 1 beta subcomplex subunit mitochondrial ame: full=complex i-ashi short=ci-ashi ame: full=nadh-ubiquinone oxidoreductase ashi subunit flags: precursor	591	gi|400525|sp|Q02372.1|NDUB8_BOVINRecName: Full=NADH dehydrogenase [ubiquinone] 1 beta subcomplex subunit 8, mitochondrial; AltName: Full=Complex I-ASHI; Short=CI-ASHI; AltName: Full=NADH-ubiquinone oxidoreductase ASHI subunit; Flags: Precursor	Q02372	3.28858e-27	59	121.324	141	84
THRIPS_11_08_2011_02335	syep_drome ame: full=bifunctional aminoacyl-trna synthetase includes: ame: full=glutamyl-trna synthetase ame: full=glutamate--trna ligase short= includes: ame: full=prolyl-trna synthetase ame: full=proline--trna ligase short=	2154	gi|44888996|sp|P28668.2|SYEP_DROMERecName: Full=Bifunctional aminoacyl-tRNA synthetase; Includes: RecName: Full=Glutamyl-tRNA synthetase; AltName: Full=Glutamate--tRNA ligase; Short=GluRS; Includes: RecName: Full=Prolyl-tRNA synthetase; AltName: Full=Proline--tRNA ligase; Short=ProRS	P28668	0	76	927.546	723	552
THRIPS_11_08_2011_02336	ghitm_mouse ame: full=growth hormone-inducible transmembrane protein	1777	gi|81879470|sp|Q91VC9.1|GHITM_MOUSERecName: Full=Growth hormone-inducible transmembrane protein	Q91VC9	3.89818e-71	75	269.626	242	183
THRIPS_11_08_2011_02339	immt_drome ame: full= mitochondrial inner membrane protein	2809	gi|251757495|sp|P91928.4|IMMT_DROMERecName: Full=Putative mitochondrial inner membrane protein	P91928	2.43294e-65	48	251.136	684	332
THRIPS_11_08_2011_02340	purbb_xenla ame: full=transcriptional activator protein pur-beta-b ame: full=purine-rich element-binding protein b-b	5955	gi|82177241|sp|Q8AVS4.3|PURBB_XENLARecName: Full=Transcriptional activator protein Pur-beta-B; AltName: Full=Purine-rich element-binding protein B-B	Q8AVS4	6.21204e-61	62	237.654	290	182
THRIPS_11_08_2011_02342	dnm3b_mouse ame: full=dna (cytosine-5)-methyltransferase 3b short=dnmt3b ame: full=dna methyltransferase short=dna mtase short=	1617	gi|17374904|sp|O88509.2|DNM3B_MOUSERecName: Full=DNA (cytosine-5)-methyltransferase 3B; Short=Dnmt3b; AltName: Full=DNA methyltransferase MmuIIIB; Short=DNA MTase MmuIIIB; Short=M.MmuIIIB	O88509	1.79927e-11	48	50.8322	124	60
THRIPS_11_08_2011_02347	ten2_mouse ame: full=teneurin-2 short=ten-2 ame: full=protein odd oz ten-m homolog 2 ame: full=tenascin-m2 short=ten-m2	2772	gi|81869787|sp|Q9WTS5.1|TEN2_MOUSERecName: Full=Teneurin-2; Short=Ten-2; AltName: Full=Protein Odd Oz/ten-m homolog 2; AltName: Full=Tenascin-M2; Short=Ten-m2	Q9WTS5	1.06105e-113	49	411.764	939	468
THRIPS_11_08_2011_02349	wd repeat-containing protein 43	634	gi|307181251|gb|EFN68941.1|WD repeat-containing protein 43 [Camponotus floridanus]	EFN68941	5.6629e-08	69	58.151	75	52
THRIPS_11_08_2011_02350	cbpd_human ame: full=carboxypeptidase d ame: full=metallocarboxypeptidase d ame: full=gp180 flags: precursor	3712	gi|115502368|sp|O75976.2|CBPD_HUMANRecName: Full=Carboxypeptidase D; AltName: Full=Metallocarboxypeptidase D; AltName: Full=gp180; Flags: Precursor	O75976	6.4778e-45	40	183.726	758	307
THRIPS_11_08_2011_02351	rl31_enccu ame: full=60s ribosomal protein l31	363	gi|51701826|sp|Q8SSC8.1|RL31_ENCCURecName: Full=60S ribosomal protein L31	Q8SSC8	2.05174e-20	77	97.4413	85	66
THRIPS_11_08_2011_02356	fa57a_mouse ame: full=protein fam57a	4524	gi|62510675|sp|Q5ND56.1|FA57A_MOUSERecName: Full=Protein FAM57A	Q5ND56	6.13618e-29	52	130.954	267	139
THRIPS_11_08_2011_02360	wdr3_human ame: full=wd repeat-containing protein 3	456	gi|12230773|sp|Q9UNX4.1|WDR3_HUMANRecName: Full=WD repeat-containing protein 3	Q9UNX4	1.871e-21	57	101.293	144	83
THRIPS_11_08_2011_02361	cyld_ponab ame: full=ubiquitin carboxyl-terminal hydrolase cyld ame: full=deubiquitinating enzyme cyld ame: full=ubiquitin thiolesterase cyld ame: full=ubiquitin-specific-processing protease cyld	1553	gi|75042495|sp|Q5RED8.1|CYLD_PONABRecName: Full=Ubiquitin carboxyl-terminal hydrolase CYLD; AltName: Full=Deubiquitinating enzyme CYLD; AltName: Full=Ubiquitin thiolesterase CYLD; AltName: Full=Ubiquitin-specific-processing protease CYLD	Q5RED8	1.84234e-122	65	439.884	461	301
THRIPS_11_08_2011_02362	crel1_bovin ame: full=cysteine-rich with egf-like domain protein 1 flags: precursor	371	gi|75057897|sp|Q5EA46.1|CREL1_BOVINRecName: Full=Cysteine-rich with EGF-like domain protein 1; Flags: Precursor	Q5EA46	1.49864e-34	68	144.436	122	84
THRIPS_11_08_2011_02363	kdm7a_danre ame: full=lysine-specific demethylase 7a short= 7a ame: full= domain-containing histone demethylation protein 1d-a	228	gi|296439738|sp|Q5RHD1.2|KDM7A_DANRERecName: Full=Lysine-specific demethylase 7A; Short=DrKDM7a; AltName: Full=JmjC domain-containing histone demethylation protein 1D-A	Q5RHD1	1.16812e-18	64	91.6633	70	45
THRIPS_11_08_2011_02366	hacd2_mouse ame: full=3-hydroxyacyl- dehydratase 2 short=hacd2 ame: full=protein-tyrosine phosphatase-like member b	1396	gi|81881322|sp|Q9D3B1.1|HACD2_MOUSERecName: Full=3-hydroxyacyl-CoA dehydratase 2; Short=HACD2; AltName: Full=Protein-tyrosine phosphatase-like member B	Q9D3B1	2.36919e-49	60	196.823	236	142
THRIPS_11_08_2011_02369	poly	863	gi|148922957|ref|NP_001092226.1|hypothetical protein LOC797807 [Danio rerio] >gi|148744679|gb|AAI42779.1| Zgc:165409 protein [Danio rerio]	NP_001092226	9.49566e-13	54	78.5666	128	70
THRIPS_11_08_2011_02373	PREDICTED: similar to predicted protein, partial [Hydra magnipapillata]	247	gi|221104995|ref|XP_002166774.1|PREDICTED: similar to predicted protein, partial [Hydra magnipapillata]	XP_002166774	1.7826e-06	67	55.8398	56	38
THRIPS_11_08_2011_02374	nubp2_culqu ame: full=cytosolic fe-s cluster assembly factor nubp2 homolog	220	gi|257096565|sp|B0XDJ0.1|NUBP2_CULQURecName: Full=Cytosolic Fe-S cluster assembly factor NUBP2 homolog	B0XDJ0	2.69476e-28	91	123.635	71	65
THRIPS_11_08_2011_02376	cog5_drome ame: full=conserved oligomeric golgi complex subunit 5 short=cog complex subunit 5 ame: full=component of oligomeric golgi complex 5 ame: full=protein four way stop	454	gi|25089946|sp|Q9VJD3.1|COG5_DROMERecName: Full=Conserved oligomeric Golgi complex subunit 5; Short=COG complex subunit 5; AltName: Full=Component of oligomeric Golgi complex 5; AltName: Full=Protein four way stop	Q9VJD3	1.40399e-13	53	75.0998	152	82
THRIPS_11_08_2011_02378	gnas_homam ame: full=guanine nucleotide-binding protein g subunit alpha ame: full=adenylate cyclase-stimulating g alpha protein	1105	gi|3913717|sp|O16118.1|GNAS_HOMAMRecName: Full=Guanine nucleotide-binding protein G(s) subunit alpha; AltName: Full=Adenylate cyclase-stimulating G alpha protein	O16118	4.52192e-140	95	387.497	205	196
THRIPS_11_08_2011_02381	broad-complex core protein isoform 6	1617	gi|307213453|gb|EFN88875.1|Broad-complex core protein isoform 6 [Harpegnathos saltator]	EFN88875	9.37019e-33	55	146.362	235	130
THRIPS_11_08_2011_02384	hypothetical protein BRAFLDRAFT_89329 [Branchiostoma floridae]	984	gi|260826744|ref|XP_002608325.1|hypothetical protein BRAFLDRAFT_89329 [Branchiostoma floridae] >gi|229293676|gb|EEN64335.1| hypothetical protein BRAFLDRAFT_89329 [Branchiostoma floridae]	XP_002608325	9.96372e-12	44	75.485	253	113
THRIPS_11_08_2011_02386	autophagy-specific gene 2 cg1241-pa	283	gi|110756810|ref|XP_001122229.1|PREDICTED: similar to Autophagy-specific gene 2 CG1241-PA [Apis mellifera]	XP_001122229	4.98073e-12	64	74.3294	82	53
THRIPS_11_08_2011_02388	u474_drome ame: full=upf0474 protein cg13624	4702	gi|74947739|sp|Q9VC61.2|U474_DROMERecName: Full=UPF0474 protein CG13624	Q9VC61	1.26949e-85	71	319.316	331	236
THRIPS_11_08_2011_02391	zn423_human ame: full=zinc finger protein 423 ame: full=olf1 ebf-associated zinc finger protein short=hoaz ame: full=smad- and olf-interacting zinc finger protein	249	gi|121941357|sp|Q2M1K9.1|ZN423_HUMANRecName: Full=Zinc finger protein 423; AltName: Full=Olf1/EBF-associated zinc finger protein; Short=hOAZ; AltName: Full=Smad- and Olf-interacting zinc finger protein	Q2M1K9	2.23564e-06	42	50.8322	84	36
THRIPS_11_08_2011_02393	szt2_mouse ame: full=protein szt2 ame: full=seizure threshold 2 protein ame: full=transcript increased in glutamate resistance short=tigr	439	gi|308154376|sp|A2A9C3.1|SZT2_MOUSERecName: Full=Protein SZT2; AltName: Full=Seizure threshold 2 protein; AltName: Full=Transcript increased in glutamate resistance; Short=TIGR	A2A9C3	1.27229e-37	66	154.836	145	97
THRIPS_11_08_2011_02394	inx2_scham ame: full=innexin inx2 short=innexin-2 ame: full=g-inx2	303	gi|10720060|sp|Q9XYN1.1|INX2_SCHAMRecName: Full=Innexin inx2; Short=Innexin-2; AltName: Full=G-Inx2	Q9XYN1	1.67674e-25	98	114.39	59	58
THRIPS_11_08_2011_02395	gtpb1_mouse ame: full=gtp-binding protein 1 short=g-protein 1 short=gp-1 short=gp1	2249	gi|114152813|sp|O08582.2|GTPB1_MOUSERecName: Full=GTP-binding protein 1; Short=G-protein 1; Short=GP-1; Short=GP1	O08582	0	86	739.569	533	460
THRIPS_11_08_2011_02396	GA28568 [Drosophila pseudoobscura pseudoobscura]	940	gi|198463339|ref|XP_002135479.1|GA28568 [Drosophila pseudoobscura pseudoobscura] >gi|198151215|gb|EDY74106.1| GA28568 [Drosophila pseudoobscura pseudoobscura]	XP_002135479	3.62788e-08	50	63.5438	139	70
THRIPS_11_08_2011_02402	axotactin cg18296-pa	210	gi|242008177|ref|XP_002424888.1|conserved hypothetical protein [Pediculus humanus corporis] >gi|212508453|gb|EEB12150.1| conserved hypothetical protein [Pediculus humanus corporis]	XP_002424888	4.07633e-27	98	124.405	63	62
THRIPS_11_08_2011_02407	pdip2_mouse ame: full=polymerase delta-interacting protein 2	475	gi|50401103|sp|Q91VA6.1|PDIP2_MOUSERecName: Full=Polymerase delta-interacting protein 2	Q91VA6	1.34553e-12	78	72.0182	46	36
THRIPS_11_08_2011_02409	vit1_peram ame: full=vitellogenin-1 short=vg-1 flags: precursor	302	gi|48428690|sp|Q9U8M0.1|VIT1_PERAMRecName: Full=Vitellogenin-1; Short=Vg-1; Flags: Precursor	Q9U8M0	5.77627e-18	65	89.3521	81	53
THRIPS_11_08_2011_02412	t2ag_drome ame: full=transcription initiation factor iia subunit 2 ame: full=general transcription factor iia subunit 2 ame: full=tfiia p14 subunit short=tfiia-14 ame: full=transcription initiation factor iia gamma chain short=tfiia-gamma ame: full=dtfiia-s	310	gi|1711664|sp|P52656.1|T2AG_DROMERecName: Full=Transcription initiation factor IIA subunit 2; AltName: Full=General transcription factor IIA subunit 2; AltName: Full=TFIIA p14 subunit; Short=TFIIA-14; AltName: Full=Transcription initiation factor IIA gamma chain; Short=TFIIA-gamma; AltName: Full=dTFIIA-S	P52656	1.76954e-35	94	147.517	85	80
THRIPS_11_08_2011_02415	zbed1_human ame: full=zinc finger bed domain-containing protein 1 ame: full= ac-like transposable element ame: full=dref homolog	1512	gi|41018380|sp|O96006.1|ZBED1_HUMANRecName: Full=Zinc finger BED domain-containing protein 1; AltName: Full=Putative Ac-like transposable element; AltName: Full=dREF homolog	O96006	1.27138e-11	51	71.633	144	74
THRIPS_11_08_2011_02416	lmo7_human ame: full=lim domain only protein 7 short=lmo-7 ame: full=f-box only protein 20 ame: full=lomp	3839	gi|308153585|sp|Q8WWI1.3|LMO7_HUMANRecName: Full=LIM domain only protein 7; Short=LMO-7; AltName: Full=F-box only protein 20; AltName: Full=LOMP	Q8WWI1	1.84367e-18	72	95.9005	74	54
THRIPS_11_08_2011_02417	lman1_mouse ame: full=protein ergic-53 ame: full=er-golgi intermediate compartment 53 kda protein ame: full=lectin mannose-binding 1 ame: full=p58 flags: precursor	3014	gi|49035535|sp|Q9D0F3.1|LMAN1_MOUSERecName: Full=Protein ERGIC-53; AltName: Full=ER-Golgi intermediate compartment 53 kDa protein; AltName: Full=Lectin mannose-binding 1; AltName: Full=p58; Flags: Precursor	Q9D0F3	4.87921e-112	62	406.371	479	299
THRIPS_11_08_2011_02418	caf1_drome ame: full=probable histone-binding protein caf1 ame: full=chromatin assembly factor 1 p55 subunit short=caf-1 p55 subunit ame: full=nucleosome-remodeling factor 55 kda subunit short=nurf-55 ame: full=dcaf-1	1574	gi|3121830|sp|Q24572.1|CAF1_DROMERecName: Full=Probable histone-binding protein Caf1; AltName: Full=Chromatin assembly factor 1 p55 subunit; Short=CAF-1 p55 subunit; AltName: Full=Nucleosome-remodeling factor 55 kDa subunit; Short=NURF-55; AltName: Full=dCAF-1	Q24572	4.26265e-167	98	588.186	285	282
THRIPS_11_08_2011_02419	dpp4_pig ame: full=dipeptidyl peptidase 4 ame: full=dipeptidyl peptidase iv short=dpp iv ame: full=t-cell activation antigen cd26 ame: cd_antigen=cd26 contains: ame: full=dipeptidyl peptidase 4 membrane form ame: full=dipeptidyl peptidase iv membrane form contains: ame: full=dipeptidyl peptidase 4 soluble form ame: full=dipeptidyl peptidase iv soluble form	1626	gi|52001458|sp|P22411.3|DPP4_PIGRecName: Full=Dipeptidyl peptidase 4; AltName: Full=Dipeptidyl peptidase IV; Short=DPP IV; AltName: Full=T-cell activation antigen CD26; AltName: CD_antigen=CD26; Contains: RecName: Full=Dipeptidyl peptidase 4 membrane form; AltName: Full=Dipeptidyl peptidase IV membrane form; Contains: RecName: Full=Dipeptidyl peptidase 4 soluble form; AltName: Full=Dipeptidyl pep…	P22411	1.20493e-71	60	271.166	374	228
THRIPS_11_08_2011_02420	fpps_chick ame: full=farnesyl pyrophosphate synthase short=fpp synthase short=fps ame: full=farnesyl diphosphate synthase includes: ame: full=dimethylallyltranstransferase includes: ame: full=geranyltranstransferase	3066	gi|3915686|sp|P08836.2|FPPS_CHICKRecName: Full=Farnesyl pyrophosphate synthase; Short=FPP synthase; Short=FPS; AltName: Full=Farnesyl diphosphate synthase; Includes: RecName: Full=Dimethylallyltranstransferase; Includes: RecName: Full=Geranyltranstransferase	P08836	2.36971e-88	70	209.92	192	136
THRIPS_11_08_2011_02421	znfx1_human ame: full=nfx1-type zinc finger-containing protein 1	985	gi|23821814|sp|Q9P2E3.2|ZNFX1_HUMANRecName: Full=NFX1-type zinc finger-containing protein 1	Q9P2E3	1.16699e-25	50	72.0182	129	65
THRIPS_11_08_2011_02423	noc2l_drome ame: full=nucleolar complex protein 2 homolog short=protein noc2 homolog	469	gi|8928529|sp|Q9VIF0.1|NOC2L_DROMERecName: Full=Nucleolar complex protein 2 homolog; Short=Protein NOC2 homolog	Q9VIF0	7.79088e-27	61	80.8777	109	67
THRIPS_11_08_2011_02424	gpdm_mouse ame: full=glycerol-3-phosphate mitochondrial short=gpd-m short=gpdh-m ame: full=protein tisp38 flags: precursor	4901	gi|146345428|sp|Q64521.2|GPDM_MOUSERecName: Full=Glycerol-3-phosphate dehydrogenase, mitochondrial; Short=GPD-M; Short=GPDH-M; AltName: Full=Protein TISP38; Flags: Precursor	Q64521	0	76	819.305	729	556
THRIPS_11_08_2011_02425	pabpa_xenla ame: full=polyadenylate-binding protein 1-a short=pabp-1-a short=poly -binding protein 1-a short=xpabp1-a ame: full=cytoplasmic poly -binding protein 1-a	2744	gi|94730404|sp|P20965.3|PABPA_XENLARecName: Full=Polyadenylate-binding protein 1-A; Short=PABP-1-A; Short=Poly(A)-binding protein 1-A; Short=xPABP1-A; AltName: Full=Cytoplasmic poly(A)-binding protein 1-A	P20965	0	76	754.207	636	488
THRIPS_11_08_2011_02426	flvc1_felca ame: full=feline leukemia virus subgroup c receptor-related protein 1	1635	gi|46396011|sp|Q9N1F2.1|FLVC1_FELCARecName: Full=Feline leukemia virus subgroup C receptor-related protein 1	Q9N1F2	5.69286e-13	53	76.2554	167	89
THRIPS_11_08_2011_02427	rab5c_canfa ame: full=ras-related protein rab-5c	2793	gi|1710027|sp|P51147.1|RAB5C_CANFARecName: Full=Ras-related protein Rab-5C	P51147	8.24242e-90	86	332.413	215	186
THRIPS_11_08_2011_02428	anm1_human ame: full=protein arginine n-methyltransferase 1 ame: full=interferon receptor 1-bound protein 4	1654	gi|161789011|sp|Q99873.2|ANM1_HUMANRecName: Full=Protein arginine N-methyltransferase 1; AltName: Full=Interferon receptor 1-bound protein 4	Q99873	8.56292e-142	87	504.212	327	286
THRIPS_11_08_2011_02430	transposable element tc3 transposase	3856	gi|307182260|gb|EFN69584.1|hypothetical protein EAG_10778 [Camponotus floridanus]	EFN69584	1.20422e-17	71	87.0409	77	55
THRIPS_11_08_2011_02431	isoform b	1149	gi|242024334|ref|XP_002432583.1|conserved hypothetical protein [Pediculus humanus corporis] >gi|212518043|gb|EEB19845.1| conserved hypothetical protein [Pediculus humanus corporis]	XP_002432583	4.21293e-15	47	87.0409	273	129
THRIPS_11_08_2011_02432	erp44_mouse ame: full=endoplasmic reticulum resident protein 44 short=er protein 44 short=erp44 ame: full=thioredoxin domain-containing protein 4 flags: precursor	2695	gi|31077036|sp|Q9D1Q6.1|ERP44_MOUSERecName: Full=Endoplasmic reticulum resident protein 44; Short=ER protein 44; Short=ERp44; AltName: Full=Thioredoxin domain-containing protein 4; Flags: Precursor	Q9D1Q6	1.21536e-106	66	388.267	398	266
THRIPS_11_08_2011_02433	low quality protein: protein	435	gi|6457927|gb|AAF09840.1|AE001886_6hypothetical protein DR_0254 [Deinococcus radiodurans R1]	AAF09840	7.70797e-26	61	120.168	120	74
THRIPS_11_08_2011_02434	se1l1_rat ame: full=protein sel-1 homolog 1 ame: full=suppressor of lin-12-like protein 1 short=sel-1l flags: precursor	3448	gi|62510950|sp|Q80Z70.2|SE1L1_RATRecName: Full=Protein sel-1 homolog 1; AltName: Full=Suppressor of lin-12-like protein 1; Short=Sel-1L; Flags: Precursor	Q80Z70	0	75	668.692	587	444
THRIPS_11_08_2011_02435	atc1_drome ame: full=calcium-transporting atpase sarcoplasmic endoplasmic reticulum type ame: full=calcium pump	7819	gi|12644163|sp|P22700.2|ATC1_DROMERecName: Full=Calcium-transporting ATPase sarcoplasmic/endoplasmic reticulum type; AltName: Full=Calcium pump	P22700	0	94	1736.85	1011	956
THRIPS_11_08_2011_02438	y2666_drome ame: full=probable serine threonine-protein kinase cg32666	3830	gi|122091999|sp|Q0KHT7.1|Y2666_DROMERecName: Full=Probable serine/threonine-protein kinase CG32666	Q0KHT7	2.20142e-88	72	328.176	286	207
THRIPS_11_08_2011_02439	tapt1_drome ame: full=protein tapt1 homolog	2500	gi|74868628|sp|Q9VED0.2|TAPT1_DROMERecName: Full=Protein TAPT1 homolog	Q9VED0	1.81666e-157	67	556.984	609	411
THRIPS_11_08_2011_02440	acac_chick ame: full=acetyl- carboxylase short=acc includes: ame: full=biotin carboxylase	8080	gi|116669|sp|P11029.1|ACAC_CHICKRecName: Full=Acetyl-CoA carboxylase; Short=ACC; Includes: RecName: Full=Biotin carboxylase	P11029	0	77	2813.87	2258	1758
THRIPS_11_08_2011_02441	noc41_xenla ame: full=nucleolar complex protein 4 homolog a short=noc4 protein homolog a ame: full=noc4-like protein a ame: full=nucleolar complex-associated protein 4-like protein a	2955	gi|73621308|sp|Q6NRQ2.1|NOC41_XENLARecName: Full=Nucleolar complex protein 4 homolog A; Short=NOC4 protein homolog A; AltName: Full=NOC4-like protein A; AltName: Full=Nucleolar complex-associated protein 4-like protein A	Q6NRQ2	2.36241e-19	69	86.2705	82	57
THRIPS_11_08_2011_02445	prs6a_human ame: full=26s protease regulatory subunit 6a ame: full=26s proteasome aaa-atpase subunit rpt5 ame: full=proteasome 26s subunit atpase 3 ame: full=proteasome subunit p50 ame: full=tat-binding protein 1 short=tbp-1	373	gi|20532406|sp|P17980.3|PRS6A_HUMANRecName: Full=26S protease regulatory subunit 6A; AltName: Full=26S proteasome AAA-ATPase subunit RPT5; AltName: Full=Proteasome 26S subunit ATPase 3; AltName: Full=Proteasome subunit P50; AltName: Full=Tat-binding protein 1; Short=TBP-1	P17980	2.28786e-59	95	226.868	124	119
THRIPS_11_08_2011_02447	ras2_drome ame: full=ras-like protein 2 flags: precursor	3557	gi|131863|sp|P04388.2|RAS2_DROMERecName: Full=Ras-like protein 2; Flags: Precursor	P04388	1.19382e-72	88	275.789	184	163
THRIPS_11_08_2011_02448	ccnt_drome ame: full=cyclin-t	4678	gi|47117789|sp|O96433.2|CCNT_DROMERecName: Full=Cyclin-T	O96433	4.82733e-61	62	237.654	275	171
THRIPS_11_08_2011_02449	rg190_drome ame: full=rho gtpase-activating protein 190 ame: full=rho gtpase-activating protein of 190 kda	1536	gi|74871454|sp|Q9VX32.2|RG190_DROMERecName: Full=Rho GTPase-activating protein 190; AltName: Full=Rho GTPase-activating protein of 190 kDa	Q9VX32	3.59156e-78	56	292.738	513	290
THRIPS_11_08_2011_02450	nik- and ikbkb-binding protein	398	gi|307191980|gb|EFN75370.1|NIK- and IKBKB-binding protein [Harpegnathos saltator]	EFN75370	9.94886e-13	60	76.6406	84	51
THRIPS_11_08_2011_02451	ubcd1_drome ame: full=ubiquitin-conjugating enzyme e2-17 kda ame: full=protein effete ame: full=ubiquitin carrier protein ame: full=ubiquitin-protein ligase	1678	gi|136643|sp|P25867.1|UBCD1_DROMERecName: Full=Ubiquitin-conjugating enzyme E2-17 kDa; AltName: Full=Protein effete; AltName: Full=Ubiquitin carrier protein; AltName: Full=Ubiquitin-protein ligase	P25867	1.08376e-83	99	311.227	147	146
THRIPS_11_08_2011_02452	fat2_drome ame: full=fat-like cadherin-related tumor suppressor homolog ame: full=protein kugelei flags: precursor	1923	gi|25090328|sp|Q9VW71.2|FAT2_DROMERecName: Full=Fat-like cadherin-related tumor suppressor homolog; AltName: Full=Protein kugelei; Flags: Precursor	Q9VW71	2.93334e-35	65	149.443	143	93
THRIPS_11_08_2011_02453	tgo1_drome ame: full=transport and golgi organization protein 1 flags: precursor	6374	gi|74869884|sp|Q9VMA7.2|TGO1_DROMERecName: Full=Transport and Golgi organization protein 1; Flags: Precursor	Q9VMA7	3.55746e-46	47	188.734	748	356
THRIPS_11_08_2011_02455	atna_drome ame: full=sodium potassium-transporting atpase subunit alpha short=na(+) k(+) atpase alpha subunit ame: full=sodium pump subunit alpha	4520	gi|14424436|sp|P13607.3|ATNA_DROMERecName: Full=Sodium/potassium-transporting ATPase subunit alpha; Short=Na(+)/K(+) ATPase alpha subunit; AltName: Full=Sodium pump subunit alpha	P13607	0	95	1759.96	1007	957
THRIPS_11_08_2011_02456	transposase domain-containing protein	3036	gi|221125384|ref|XP_002160170.1|PREDICTED: similar to predicted protein [Hydra magnipapillata]	XP_002160170	3.05405e-65	47	255.373	587	281
THRIPS_11_08_2011_02461	PREDICTED: similar to nadrin [Apis mellifera]	594	gi|110772753|ref|XP_395006.3|PREDICTED: similar to nadrin [Apis mellifera]	XP_395006	2.25945e-06	47	56.225	131	62
THRIPS_11_08_2011_02472	adro_salfo ame: full=nadph:adrenodoxin mitochondrial short=ar short=adrenodoxin reductase ame: full=ferredoxin--nadp(+) reductase short=ferredoxin reductase flags: precursor	372	gi|18202431|sp|P82861.1|ADRO_SALFORecName: Full=NADPH:adrenodoxin oxidoreductase, mitochondrial; Short=AR; Short=Adrenodoxin reductase; AltName: Full=Ferredoxin--NADP(+) reductase; Short=Ferredoxin reductase; Flags: Precursor	P82861	3.56701e-36	77	149.828	119	92
THRIPS_11_08_2011_02474	dcr1_drome ame: full=endoribonuclease dcr-1 short=protein dicer-1	202	gi|51316117|sp|Q9VCU9.1|DCR1_DROMERecName: Full=Endoribonuclease Dcr-1; Short=Protein dicer-1	Q9VCU9	1.84937e-08	61	57.7658	67	41
THRIPS_11_08_2011_02475	isoform a	906	gi|156553622|ref|XP_001600095.1|PREDICTED: similar to ENSANGP00000021733 [Nasonia vitripennis]	XP_001600095	2.90158e-132	86	475.707	293	254
THRIPS_11_08_2011_02484	wls_drogr ame: full=protein wntless flags: precursor	204	gi|284022107|sp|B4J2W3.2|WLS_DROGRRecName: Full=Protein wntless; Flags: Precursor	B4J2W3	5.74895e-10	75	62.7734	70	53
THRIPS_11_08_2011_02486	liga_human ame: full=ligatin ame: full=hepatocellular carcinoma-associated antigen 56	278	gi|158957575|sp|P41214.3|LIGA_HUMANRecName: Full=Ligatin; AltName: Full=Hepatocellular carcinoma-associated antigen 56	P41214	4.24169e-13	64	73.1738	76	49
THRIPS_11_08_2011_02487	ctcf-like protein	209	gi|156555453|ref|XP_001606075.1|PREDICTED: similar to CTCF-like protein [Nasonia vitripennis]	XP_001606075	1.78647e-06	62	55.8398	66	41
THRIPS_11_08_2011_02489	cg7492 cg7492-pa	209	gi|193587416|ref|XP_001946870.1|PREDICTED: similar to conserved hypothetical protein [Acyrthosiphon pisum]	XP_001946870	1.11897e-08	60	63.1586	69	42
THRIPS_11_08_2011_02492	pde7b_mouse ame: full=camp-specific 3 -cyclic phosphodiesterase 7b	208	gi|13626187|sp|Q9QXQ1.1|PDE7B_MOUSERecName: Full=cAMP-specific 3',5'-cyclic phosphodiesterase 7B	Q9QXQ1	5.70107e-18	77	89.3521	67	52
THRIPS_11_08_2011_02496	macf4_human ame: full=microtubule-actin cross-linking factor isoform 4	746	gi|296434581|sp|Q96PK2.2|MACF4_HUMANRecName: Full=Microtubule-actin cross-linking factor 1, isoform 4	Q96PK2	4.42009e-23	49	108.227	245	122
THRIPS_11_08_2011_02501	mbrl_human ame: full=membralin	471	gi|68565394|sp|Q4ZIN3.1|MBRL_HUMANRecName: Full=Membralin	Q4ZIN3	3.27594e-51	76	200.29	155	119
THRIPS_11_08_2011_02505	gtpb2_human ame: full=gtp-binding protein 2	206	gi|74752415|sp|Q9BX10.1|GTPB2_HUMANRecName: Full=GTP-binding protein 2	Q9BX10	1.66765e-09	79	61.2326	48	38
THRIPS_11_08_2011_02509	ube3a_human ame: full=ubiquitin-protein ligase e3a ame: full=e6ap ubiquitin-protein ligase ame: full=human papillomavirus e6-associated protein ame: full=oncogenic protein-associated protein e6-ap ame: full=renal carcinoma antigen ny-ren-54	285	gi|215274240|sp|Q05086.4|UBE3A_HUMANRecName: Full=Ubiquitin-protein ligase E3A; AltName: Full=E6AP ubiquitin-protein ligase; AltName: Full=Human papillomavirus E6-associated protein; AltName: Full=Oncogenic protein-associated protein E6-AP; AltName: Full=Renal carcinoma antigen NY-REN-54	Q05086	4.64858e-20	72	96.2857	93	67
THRIPS_11_08_2011_02511	domain and heat repeat-containing protein kiaa1468	206	gi|242021762|ref|XP_002431312.1|conserved hypothetical protein [Pediculus humanus corporis] >gi|212516580|gb|EEB18574.1| conserved hypothetical protein [Pediculus humanus corporis]	XP_002431312	6.58184e-09	83	63.929	48	40
THRIPS_11_08_2011_02512	srgef_human ame: full=secretion-regulating guanine nucleotide exchange factor ame: full=deafness locus-associated guanine nucleotide exchange factor short= ame: full=guanine nucleotide exchange factor-related protein	620	gi|38257790|sp|Q9UGK8.2|SRGEF_HUMANRecName: Full=Secretion-regulating guanine nucleotide exchange factor; AltName: Full=Deafness locus-associated putative guanine nucleotide exchange factor; Short=DelGEF; AltName: Full=Guanine nucleotide exchange factor-related protein	Q9UGK8	1.98571e-25	49	115.546	218	108
THRIPS_11_08_2011_02513	liver stage antigen-	500	gi|294939226|ref|XP_002782364.1|hypothetical protein Pmar_PMAR029222 [Perkinsus marinus ATCC 50983] >gi|239893970|gb|EER14159.1| hypothetical protein Pmar_PMAR029222 [Perkinsus marinus ATCC 50983]	XP_002782364	2.83018e-12	54	75.0998	150	81
THRIPS_11_08_2011_02517	45 kda calcium-binding protein	208	gi|189237223|ref|XP_969624.2|PREDICTED: similar to CG31475 CG31475-PA [Tribolium castaneum]	XP_969624	3.47037e-18	77	94.7449	70	54
THRIPS_11_08_2011_02519	herc1_human ame: full=probable e3 ubiquitin-protein ligase herc1 ame: full=hect domain and rcc1-like domain-containing protein 1 ame: full=p532 ame: full=p619	207	gi|296434522|sp|Q15751.2|HERC1_HUMANRecName: Full=Probable E3 ubiquitin-protein ligase HERC1; AltName: Full=HECT domain and RCC1-like domain-containing protein 1; AltName: Full=p532; AltName: Full=p619	Q15751	2.17144e-09	75	60.8474	69	52
THRIPS_11_08_2011_02522	cyclic amp-dependent transcription factor atf-4	839	gi|307173817|gb|EFN64595.1|Cyclic AMP-dependent transcription factor ATF-4 [Camponotus floridanus]	EFN64595	3.30981e-07	47	60.077	121	57
THRIPS_11_08_2011_02523	resa-like protein with	540	gi|296004496|ref|XP_002808614.1|RESA-like protein with DnaJ domain, putative [Plasmodium falciparum 3D7] >gi|224591380|emb|CAX51196.1| RESA-like protein with DnaJ domain, putative [Plasmodium falciparum 3D7]	XP_002808614	1.32304e-06	48	56.6102	170	82
THRIPS_11_08_2011_02525	sdcg1_human ame: full=serologically defined colon cancer antigen 1 ame: full=antigen ny-co-1	344	gi|269849764|sp|O60524.4|SDCG1_HUMANRecName: Full=Serologically defined colon cancer antigen 1; AltName: Full=Antigen NY-CO-1	O60524	7.20126e-21	76	98.9821	77	59
THRIPS_11_08_2011_02531	ei2bb_takru ame: full=translation initiation factor eif-2b subunit beta ame: full=s20i15 ame: full=eif-2b gdp-gtp exchange factor subunit beta	383	gi|3182996|sp|Q90511.1|EI2BB_TAKRURecName: Full=Translation initiation factor eIF-2B subunit beta; AltName: Full=S20I15; AltName: Full=eIF-2B GDP-GTP exchange factor subunit beta	Q90511	3.18768e-29	80	126.716	97	78
THRIPS_11_08_2011_02532	cnot6_human ame: full=ccr4-not transcription complex subunit 6 ame: full=ccr4 carbon catabolite repression 4-like ame: full=carbon catabolite repressor protein 4 homolog ame: full=cytoplasmic deadenylase	224	gi|46396033|sp|Q9ULM6.2|CNOT6_HUMANRecName: Full=CCR4-NOT transcription complex subunit 6; AltName: Full=CCR4 carbon catabolite repression 4-like; AltName: Full=Carbon catabolite repressor protein 4 homolog; AltName: Full=Cytoplasmic deadenylase	Q9ULM6	1.17073e-15	84	81.6481	58	49
THRIPS_11_08_2011_02538	tmm98_xenla ame: full=transmembrane protein 98	372	gi|82184880|sp|Q6INX1.1|TMM98_XENLARecName: Full=Transmembrane protein 98	Q6INX1	8.8157e-11	67	65.4698	74	50
THRIPS_11_08_2011_02539	emal2_human ame: full=echinoderm microtubule-associated 2 short=emap-2 short= -2	317	gi|17374910|sp|O95834.1|EMAL2_HUMANRecName: Full=Echinoderm microtubule-associated protein-like 2; Short=EMAP-2; Short=HuEMAP-2	O95834	2.63264e-23	81	107.071	74	60
THRIPS_11_08_2011_02542	t184c_bovin ame: full=transmembrane protein 184c ame: full=transmembrane protein 34	528	gi|122142565|sp|Q17QL9.1|T184C_BOVINRecName: Full=Transmembrane protein 184C; AltName: Full=Transmembrane protein 34	Q17QL9	8.35591e-55	76	212.616	174	133
THRIPS_11_08_2011_02544	acads_mouse ame: full=short-chain specific acyl- mitochondrial short=scad ame: full=butyryl- dehydrogenase flags: precursor	517	gi|584714|sp|Q07417.1|ACADS_MOUSERecName: Full=Short-chain specific acyl-CoA dehydrogenase, mitochondrial; Short=SCAD; AltName: Full=Butyryl-CoA dehydrogenase; Flags: Precursor	Q07417	1.38164e-14	86	78.9518	51	44
THRIPS_11_08_2011_02547	rs28_drome ame: full=40s ribosomal protein s28	878	gi|51316939|sp|Q9W334.2|RS28_DROMERecName: Full=40S ribosomal protein S28	Q9W334	9.285e-21	98	100.908	51	50
THRIPS_11_08_2011_02551	ago2_drome ame: full=protein argonaute-2	245	gi|51316118|sp|Q9VUQ5.3|AGO2_DROMERecName: Full=Protein argonaute-2	Q9VUQ5	1.72257e-06	50	51.2174	87	44
THRIPS_11_08_2011_02553	sdsb_pses9 ame: full=sds degradation transcriptional activation protein	201	gi|1711356|sp|P52686.1|SDSB_PSES9RecName: Full=SDS degradation transcriptional activation protein	P52686	1.19873e-07	65	55.0694	60	39
THRIPS_11_08_2011_02558	dock4_human ame: full=dedicator of cytokinesis protein 4	268	gi|296439369|sp|Q8N1I0.3|DOCK4_HUMANRecName: Full=Dedicator of cytokinesis protein 4	Q8N1I0	9.24145e-08	59	55.4546	100	59
THRIPS_11_08_2011_02559	26s proteasome regulatory subunit 12	200	gi|303388906|ref|XP_003072686.1|putative 26S proteasome regulatory subunit 12 [Encephalitozoon intestinalis ATCC 50506] >gi|303301828|gb|ADM11326.1| putative 26S proteasome regulatory subunit 12 [Encephalitozoon intestinalis ATCC 50506]	XP_003072686	6.38758e-20	87	100.523	65	57
THRIPS_11_08_2011_02560	hypothetical protein EAI_12900 [Harpegnathos saltator]	202	gi|307210857|gb|EFN87210.1|hypothetical protein EAI_12900 [Harpegnathos saltator]	EFN87210	5.99248e-10	72	67.3958	65	47
THRIPS_11_08_2011_02563	heat repeat-containing protein c7orf27	1318	gi|270011583|gb|EFA08031.1|hypothetical protein TcasGA2_TC005620 [Tribolium castaneum]	EFA08031	4.90541e-50	64	203.371	253	164
THRIPS_11_08_2011_02564	chkb_mouse ame: full=choline ethanolamine kinase ame: full=choline kinase beta short=ck short=ckb ame: full=ethanolamine kinase short=ek ame: full=choline ethanolamine kinase beta short=ckekb	7098	gi|6685597|sp|O55229.3|CHKB_MOUSERecName: Full=Choline/ethanolamine kinase; AltName: Full=Choline kinase beta; Short=CK; Short=CKB; AltName: Full=Ethanolamine kinase; Short=EK; AltName: Full=choline/ethanolamine kinase beta; Short=CKEKB	O55229	1.49791e-69	64	266.544	301	193
THRIPS_11_08_2011_02567	nvl_human ame: full=nuclear valosin-containing short=nvlp short=nuclear vcp-like protein	201	gi|32699415|sp|O15381.1|NVL_HUMANRecName: Full=Nuclear valosin-containing protein-like; Short=NVLp; Short=Nuclear VCP-like protein	O15381	8.57667e-22	89	102.064	64	57
THRIPS_11_08_2011_02569	bacd1_mouse ame: full=btb poz domain-containing adapter for cul3-mediated degradation protein 1 ame: full=btb poz domain-containing protein kctd13 ame: full=polymerase delta-interacting protein 1	201	gi|51701587|sp|Q8BGV7.1|BACD1_MOUSERecName: Full=BTB/POZ domain-containing adapter for CUL3-mediated RhoA degradation protein 1; AltName: Full=BTB/POZ domain-containing protein KCTD13; AltName: Full=Polymerase delta-interacting protein 1	Q8BGV7	1.08244e-24	89	111.694	66	59
THRIPS_11_08_2011_02571	cpsf1_drome ame: full=cleavage and polyadenylation specificity factor subunit 1 ame: full=cleavage and polyadenylation specificity factor 160 kda subunit short=cpsf 160 kda subunit short=dcpsf 160	816	gi|18203551|sp|Q9V726.1|CPSF1_DROMERecName: Full=Cleavage and polyadenylation specificity factor subunit 1; AltName: Full=Cleavage and polyadenylation specificity factor 160 kDa subunit; Short=CPSF 160 kDa subunit; Short=dCPSF 160	Q9V726	7.25352e-46	68	103.99	103	71
THRIPS_11_08_2011_02572	ain1_schpo ame: full=alpha-actinin-like protein 1	285	gi|74675922|sp|O13728.1|AIN1_SCHPORecName: Full=Alpha-actinin-like protein 1	O13728	5.67714e-10	61	62.7734	83	51
THRIPS_11_08_2011_02573	plcc_mouse ame: full=1-acyl-sn-glycerol-3-phosphate acyltransferase gamma ame: full=1-acylglycerol-3-phosphate o-acyltransferase 3 short=1-agp acyltransferase 3 short=1-agpat 3 ame: full=lysophosphatidic acid acyltransferase gamma short=lpaat-gamma	404	gi|61214403|sp|Q9D517.2|PLCC_MOUSERecName: Full=1-acyl-sn-glycerol-3-phosphate acyltransferase gamma; AltName: Full=1-acylglycerol-3-phosphate O-acyltransferase 3; Short=1-AGP acyltransferase 3; Short=1-AGPAT 3; AltName: Full=Lysophosphatidic acid acyltransferase gamma; Short=LPAAT-gamma	Q9D517	8.79085e-11	58	65.4698	80	47
THRIPS_11_08_2011_02575	pp4r4_human ame: full=serine threonine-protein phosphatase 4 regulatory subunit 4	356	gi|74736832|sp|Q6NUP7.1|PP4R4_HUMANRecName: Full=Serine/threonine-protein phosphatase 4 regulatory subunit 4	Q6NUP7	2.70486e-12	55	70.4774	118	65
THRIPS_11_08_2011_02577	hd_fugru ame: full=huntingtin ame: full=huntington disease protein homolog short=hd protein homolog	556	gi|1708160|sp|P51112.1|HD_FUGRURecName: Full=Huntingtin; AltName: Full=Huntington disease protein homolog; Short=HD protein homolog	P51112	1.1304e-15	62	82.8037	123	77
THRIPS_11_08_2011_02578	glo2_rat ame: full=hydroxyacylglutathione mitochondrial ame: full=glyoxalase ii short=glx ii ame: full=round spermatid protein rsp29 flags: precursor	710	gi|257051018|sp|O35952.2|GLO2_RATRecName: Full=Hydroxyacylglutathione hydrolase, mitochondrial; AltName: Full=Glyoxalase II; Short=Glx II; AltName: Full=Round spermatid protein RSP29; Flags: Precursor	O35952	5.14047e-26	73	117.857	94	69
THRIPS_11_08_2011_02580	tdif2_mouse ame: full=deoxynucleotidyltransferase terminal-interacting protein 2	622	gi|81901546|sp|Q8R2M2.1|TDIF2_MOUSERecName: Full=Deoxynucleotidyltransferase terminal-interacting protein 2	Q8R2M2	1.46242e-44	63	179.104	202	129
THRIPS_11_08_2011_02584	ftzf1_bommo ame: full=nuclear hormone receptor ftz-f1 ame: full= -f1 ame: full=nuclear receptor subfamily 5 group a member 3	3635	gi|44889025|sp|P49867.2|FTZF1_BOMMORecName: Full=Nuclear hormone receptor FTZ-F1; AltName: Full=BmFTZ-F1; AltName: Full=Nuclear receptor subfamily 5 group A member 3	P49867	1.3898e-92	88	342.043	237	210
THRIPS_11_08_2011_02586	xpp1_human ame: full=xaa-pro aminopeptidase 1 ame: full=aminoacylproline aminopeptidase ame: full=cytosolic aminopeptidase p ame: full=soluble aminopeptidase p short=samp ame: full=x-pro aminopeptidase 1 ame: full=x-prolyl aminopeptidase soluble	1132	gi|68566146|sp|Q9NQW7.3|XPP1_HUMANRecName: Full=Xaa-Pro aminopeptidase 1; AltName: Full=Aminoacylproline aminopeptidase; AltName: Full=Cytosolic aminopeptidase P; AltName: Full=Soluble aminopeptidase P; Short=sAmp; AltName: Full=X-Pro aminopeptidase 1; AltName: Full=X-prolyl aminopeptidase 1, soluble	Q9NQW7	7.15448e-107	68	387.497	380	259
THRIPS_11_08_2011_02588	mob2_drops ame: full=mps one binder kinase activator-like 2 ame: full=mob as tumor suppressor protein 2	927	gi|223590087|sp|Q2LZ59.2|MOB2_DROPSRecName: Full=Mps one binder kinase activator-like 2; AltName: Full=Mob as tumor suppressor protein 2	Q2LZ59	1.8495e-74	81	198.749	136	111
THRIPS_11_08_2011_02589	ckap5_human ame: full=cytoskeleton-associated protein 5 ame: full=colonic and hepatic tumor over-expressed gene protein short=ch-tog	1276	gi|212276513|sp|Q14008.3|CKAP5_HUMANRecName: Full=Cytoskeleton-associated protein 5; AltName: Full=Colonic and hepatic tumor over-expressed gene protein; Short=Ch-TOG	Q14008	3.14412e-53	57	209.534	373	215
THRIPS_11_08_2011_02590	f10a1_mouse ame: full=hsc70-interacting protein short=hip ame: full=protein fam10a1 ame: full=protein st13 homolog	653	gi|20535319|sp|Q99L47.1|F10A1_MOUSERecName: Full=Hsc70-interacting protein; Short=Hip; AltName: Full=Protein FAM10A1; AltName: Full=Protein ST13 homolog	Q99L47	1.72029e-46	69	185.652	201	140
THRIPS_11_08_2011_02594	dido1_human ame: full=death-inducer obliterator 1 short=dio-1 short=hdido1 ame: full=death-associated transcription factor 1 short=datf-1	897	gi|116241332|sp|Q9BTC0.5|DIDO1_HUMANRecName: Full=Death-inducer obliterator 1; Short=DIO-1; Short=hDido1; AltName: Full=Death-associated transcription factor 1; Short=DATF-1	Q9BTC0	2.97941e-14	47	79.337	191	90
THRIPS_11_08_2011_02595	denn domain-containing	2264	gi|91094007|ref|XP_971310.1|PREDICTED: similar to AGAP009774-PA [Tribolium castaneum] >gi|270016162|gb|EFA12610.1| hypothetical protein TcasGA2_TC006851 [Tribolium castaneum]	XP_971310	1.02275e-14	38	87.0409	414	160
THRIPS_11_08_2011_02596	nbas_human ame: full=neuroblastoma-amplified sequence ame: full=neuroblastoma-amplified gene protein	1124	gi|224471843|sp|A2RRP1.2|NBAS_HUMANRecName: Full=Neuroblastoma-amplified sequence; AltName: Full=Neuroblastoma-amplified gene protein	A2RRP1	3.16623e-14	47	79.7221	217	104
THRIPS_11_08_2011_02598	hic2_mouse ame: full=hypermethylated in cancer 2 protein short=hic-2	948	gi|108935812|sp|Q9JLZ6.3|HIC2_MOUSERecName: Full=Hypermethylated in cancer 2 protein; Short=Hic-2	Q9JLZ6	2.18413e-10	67	66.6254	53	36
THRIPS_11_08_2011_02599	dpp4_pig ame: full=dipeptidyl peptidase 4 ame: full=dipeptidyl peptidase iv short=dpp iv ame: full=t-cell activation antigen cd26 ame: cd_antigen=cd26 contains: ame: full=dipeptidyl peptidase 4 membrane form ame: full=dipeptidyl peptidase iv membrane form contains: ame: full=dipeptidyl peptidase 4 soluble form ame: full=dipeptidyl peptidase iv soluble form	966	gi|52001458|sp|P22411.3|DPP4_PIGRecName: Full=Dipeptidyl peptidase 4; AltName: Full=Dipeptidyl peptidase IV; Short=DPP IV; AltName: Full=T-cell activation antigen CD26; AltName: CD_antigen=CD26; Contains: RecName: Full=Dipeptidyl peptidase 4 membrane form; AltName: Full=Dipeptidyl peptidase IV membrane form; Contains: RecName: Full=Dipeptidyl peptidase 4 soluble form; AltName: Full=Dipeptidyl pep…	P22411	7.14031e-25	56	114.775	145	82
THRIPS_11_08_2011_02600	smox_mouse ame: full=spermine oxidase ame: full=polyamine oxidase 1 short=pao-1 short=paoh1	443	gi|50401656|sp|Q99K82.1|SMOX_MOUSERecName: Full=Spermine oxidase; AltName: Full=Polyamine oxidase 1; Short=PAO-1; Short=PAOh1	Q99K82	8.71953e-13	64	72.4034	79	51
THRIPS_11_08_2011_02601	ndus4_mouse ame: full=nadh dehydrogenase iron-sulfur protein mitochondrial ame: full=complex i-18 kda short=ci-18 kda ame: full=complex i-aqdq short=ci-aqdq ame: full=nadh-ubiquinone oxidoreductase 18 kda subunit flags: precursor	993	gi|47117304|sp|Q9CXZ1.3|NDUS4_MOUSERecName: Full=NADH dehydrogenase [ubiquinone] iron-sulfur protein 4, mitochondrial; AltName: Full=Complex I-18 kDa; Short=CI-18 kDa; AltName: Full=Complex I-AQDQ; Short=CI-AQDQ; AltName: Full=NADH-ubiquinone oxidoreductase 18 kDa subunit; Flags: Precursor	Q9CXZ1	4.3496e-41	78	168.703	123	96
THRIPS_11_08_2011_02602	afad_human ame: full=afadin ame: full=all1-fused gene from chromosome 6 protein short=protein af-6	2063	gi|288558835|sp|P55196.3|AFAD_HUMANRecName: Full=Afadin; AltName: Full=ALL1-fused gene from chromosome 6 protein; Short=Protein AF-6	P55196	2.88458e-113	62	409.838	480	301
THRIPS_11_08_2011_02604	ddx6_drome ame: full= atp-dependent rna helicase me31b ame: full=maternal expression at 31b	3743	gi|41712743|sp|P23128.3|DDX6_DROMERecName: Full=Putative ATP-dependent RNA helicase me31b; AltName: Full=Maternal expression at 31B	P23128	7.78872e-131	90	469.159	275	250
THRIPS_11_08_2011_02607	mot14_mouse ame: full=monocarboxylate transporter 14 short=mct 14 ame: full=solute carrier family 16 member 14	1480	gi|81878442|sp|Q8K1C7.1|MOT14_MOUSERecName: Full=Monocarboxylate transporter 14; Short=MCT 14; AltName: Full=Solute carrier family 16 member 14	Q8K1C7	1.50297e-33	61	144.436	190	116
THRIPS_11_08_2011_02608	gak_human ame: full=cyclin-g-associated kinase	2285	gi|17375734|sp|O14976.2|GAK_HUMANRecName: Full=Cyclin-G-associated kinase	O14976	9.25093e-68	60	258.84	312	189
THRIPS_11_08_2011_02609	h1_drome ame: full=histone h1	1407	gi|121947|sp|P02255.1|H1_DROMERecName: Full=Histone H1	P02255	1.91231e-22	89	107.457	69	62
THRIPS_11_08_2011_02610	wwp2_mouse ame: full=nedd4-like e3 ubiquitin-protein ligase wwp2 ame: full=ww domain-containing protein 2	775	gi|32171907|sp|Q9DBH0.1|WWP2_MOUSERecName: Full=NEDD4-like E3 ubiquitin-protein ligase WWP2; AltName: Full=WW domain-containing protein 2	Q9DBH0	7.60102e-13	97	74.3294	35	34
THRIPS_11_08_2011_02611	arginine serine-rich	1012	gi|242006500|ref|XP_002424088.1|arginine/serine-rich protein, putative [Pediculus humanus corporis] >gi|212507394|gb|EEB11350.1| arginine/serine-rich protein, putative [Pediculus humanus corporis]	XP_002424088	3.03705e-11	50	73.9442	204	102
THRIPS_11_08_2011_02615	plexus cg4444-pa	1826	gi|307197063|gb|EFN78435.1|hypothetical protein EAI_13704 [Harpegnathos saltator]	EFN78435	3.61013e-177	68	626.32	576	392
THRIPS_11_08_2011_02616	ddx55_xenla ame: full=atp-dependent rna helicase ddx55 ame: full=dead box protein 55	274	gi|82199952|sp|Q6AZV7.1|DDX55_XENLARecName: Full=ATP-dependent RNA helicase DDX55; AltName: Full=DEAD box protein 55	Q6AZV7	1.72367e-22	72	104.375	91	66
THRIPS_11_08_2011_02623	tf2aa_drome ame: full=transcription initiation factor iia subunit 1 ame: full=general transcription factor iia subunit 1 ame: full=dtfiia-l contains: ame: full=transcription initiation factor iia alpha chain ame: full=tfiia p30 subunit contains: ame: full=transcription initiation factor iia beta chain ame: full=tfiia p20 subunit	1028	gi|71153182|sp|P52654.2|TF2AA_DROMERecName: Full=Transcription initiation factor IIA subunit 1; AltName: Full=General transcription factor IIA subunit 1; AltName: Full=dTFIIA-L; Contains: RecName: Full=Transcription initiation factor IIA alpha chain; AltName: Full=TFIIA p30 subunit; Contains: RecName: Full=Transcription initiation factor IIA beta chain; AltName: Full=TFIIA p20 subunit	P52654	5.23239e-37	68	155.221	221	151
THRIPS_11_08_2011_02624	cp4c1_bladi ame: full=cytochrome p450 4c1 ame: full=cypivc1	386	gi|231885|sp|P29981.1|CP4C1_BLADIRecName: Full=Cytochrome P450 4C1; AltName: Full=CYPIVC1	P29981	7.59495e-15	58	78.9518	122	71
THRIPS_11_08_2011_02627	srap_staau ame: full=serine-rich adhesin for platelets ame: full=staphylococcus aureus surface protein a flags: precursor	2584	gi|75404754|sp|Q8VQ99.1|SRAP_STAAURecName: Full=Serine-rich adhesin for platelets; AltName: Full=Staphylococcus aureus surface protein A; Flags: Precursor	Q8VQ99	4.24891e-08	37	60.8474	788	296
THRIPS_11_08_2011_02630	coq5_drome ame: full=ubiquinone biosynthesis methyltransferase mitochondrial flags: precursor	466	gi|75027708|sp|Q9VYF8.1|COQ5_DROMERecName: Full=Ubiquinone biosynthesis methyltransferase COQ5, mitochondrial; Flags: Precursor	Q9VYF8	2.18616e-52	77	204.142	154	119
THRIPS_11_08_2011_02631	itpl_schgr ame: full=ion transport peptide-like flags: precursor	2071	gi|6016403|sp|Q26492.1|ITPL_SCHGRRecName: Full=Ion transport peptide-like; Flags: Precursor	Q26492	2.10977e-39	96	164.466	83	80
THRIPS_11_08_2011_02635	i5p1_human ame: full=type i inositol- -trisphosphate 5-phosphatase short=5ptase flags: precursor	1284	gi|3122245|sp|Q14642.1|I5P1_HUMANRecName: Full=Type I inositol-1,4,5-trisphosphate 5-phosphatase; Short=5PTase; Flags: Precursor	Q14642	8.26668e-102	68	370.933	367	253
THRIPS_11_08_2011_02637	spt2_drome ame: full=protein spt2 homolog	434	gi|74864529|sp|Q8IMP6.1|SPT2_DROMERecName: Full=Protein SPT2 homolog	Q8IMP6	3.63445e-13	60	73.559	130	78
THRIPS_11_08_2011_02638	dhdds_human ame: full=dehydrodolichyl diphosphate synthase short=dedol-pp synthase	1310	gi|116241329|sp|Q86SQ9.3|DHDDS_HUMANRecName: Full=Dehydrodolichyl diphosphate synthase; Short=Dedol-PP synthase	Q86SQ9	8.81696e-83	73	307.76	263	193
THRIPS_11_08_2011_02640	rs19a_drome ame: full=40s ribosomal protein s19a	757	gi|55584083|sp|P39018.3|RS19A_DROMERecName: Full=40S ribosomal protein S19a	P39018	1.50136e-50	83	199.519	138	115
THRIPS_11_08_2011_02641	po22_popja ame: full=retrovirus-related pol polyprotein from type-1 retrotransposable element r2 ame: full=retrovirus-related pol polyprotein from type i retrotransposable element r2 includes: ame: full=reverse transcriptase includes: ame: full=endonuclease	2719	gi|548547|sp|Q03274.1|PO22_POPJARecName: Full=Retrovirus-related Pol polyprotein from type-1 retrotransposable element R2; AltName: Full=Retrovirus-related Pol polyprotein from type I retrotransposable element R2; Includes: RecName: Full=Reverse transcriptase; Includes: RecName: Full=Endonuclease	Q03274	1.2729e-23	54	102.449	155	85
THRIPS_11_08_2011_02642	mknk2_human ame: full=map kinase-interacting serine threonine-protein kinase 2 ame: full=map kinase signal-integrating kinase 2 short=mnk2	2916	gi|90102033|sp|Q9HBH9.3|MKNK2_HUMANRecName: Full=MAP kinase-interacting serine/threonine-protein kinase 2; AltName: Full=MAP kinase signal-integrating kinase 2; Short=Mnk2	Q9HBH9	1.0807e-132	73	474.937	423	311
THRIPS_11_08_2011_02643	ubp7_human ame: full=ubiquitin carboxyl-terminal hydrolase 7 ame: full=deubiquitinating enzyme 7 ame: full=herpesvirus-associated ubiquitin-specific protease ame: full=ubiquitin thioesterase 7 ame: full=ubiquitin-specific-processing protease 7	2973	gi|212276477|sp|Q93009.2|UBP7_HUMANRecName: Full=Ubiquitin carboxyl-terminal hydrolase 7; AltName: Full=Deubiquitinating enzyme 7; AltName: Full=Herpesvirus-associated ubiquitin-specific protease; AltName: Full=Ubiquitin thioesterase 7; AltName: Full=Ubiquitin-specific-processing protease 7	Q93009	0	77	1142.49	892	690
THRIPS_11_08_2011_02644	fumh_danre ame: full=fumarate mitochondrial short=fumarase flags: precursor	2094	gi|39931358|sp|Q7SX99.1|FUMH_DANRERecName: Full=Fumarate hydratase, mitochondrial; Short=Fumarase; Flags: Precursor	Q7SX99	0	87	718.383	475	417
THRIPS_11_08_2011_02645	far1_arath ame: full=protein far-red impaired response 1	4336	gi|75213095|sp|Q9SWG3.1|FAR1_ARATHRecName: Full=Protein FAR-RED IMPAIRED RESPONSE 1	Q9SWG3	1.04187e-17	43	93.5893	321	139
THRIPS_11_08_2011_02646	ncoa2_human ame: full=nuclear receptor coactivator 2 short=n -2 ame: full=class e basic helix-loop-helix protein 75 short=bhlhe75 ame: full=transcriptional intermediary factor 2 short=htif2	3995	gi|13626594|sp|Q15596.2|NCOA2_HUMANRecName: Full=Nuclear receptor coactivator 2; Short=NCoA-2; AltName: Full=Class E basic helix-loop-helix protein 75; Short=bHLHe75; AltName: Full=Transcriptional intermediary factor 2; Short=hTIF2	Q15596	1.01201e-35	48	153.295	357	172
THRIPS_11_08_2011_02647	cklf4_mouse ame: full=cklf-like marvel transmembrane domain-containing protein 4 ame: full=chemokine-like factor superfamily member 4	2446	gi|34921729|sp|Q8CJ61.1|CKLF4_MOUSERecName: Full=CKLF-like MARVEL transmembrane domain-containing protein 4; AltName: Full=Chemokine-like factor superfamily member 4	Q8CJ61	1.16055e-07	50	59.3066	128	65
THRIPS_11_08_2011_02648	mu138_schpo ame: full= zinc protease mug138 ame: full=meiotically up-regulated gene 138 protein	2506	gi|3183401|sp|O14077.1|MU138_SCHPORecName: Full=Putative zinc protease mug138; AltName: Full=Meiotically up-regulated gene 138 protein	O14077	1.72441e-06	49	55.4546	185	91
THRIPS_11_08_2011_02650	lipp_rabit ame: full=pancreatic triacylglycerol lipase short=pl short=pancreatic lipase flags: precursor	1783	gi|400193|sp|Q02157.1|LIPP_RABITRecName: Full=Pancreatic triacylglycerol lipase; Short=PL; Short=Pancreatic lipase; Flags: Precursor	Q02157	2.53769e-29	51	100.138	179	93
THRIPS_11_08_2011_02651	rab5c_canfa ame: full=ras-related protein rab-5c	2819	gi|1710027|sp|P51147.1|RAB5C_CANFARecName: Full=Ras-related protein Rab-5C	P51147	8.33469e-90	86	332.413	215	186
THRIPS_11_08_2011_02653	dnja2_human ame: full= homolog subfamily a member 2 ame: full=cell cycle progression restoration gene 3 protein ame: full=dnj3 short=dj3 ame: full=hira-interacting protein 4 ame: full=renal carcinoma antigen ny-ren-14	2683	gi|14916548|sp|O60884.1|DNJA2_HUMANRecName: Full=DnaJ homolog subfamily A member 2; AltName: Full=Cell cycle progression restoration gene 3 protein; AltName: Full=Dnj3; Short=Dj3; AltName: Full=HIRA-interacting protein 4; AltName: Full=Renal carcinoma antigen NY-REN-14	O60884	4.00188e-107	68	214.542	219	149
THRIPS_11_08_2011_02654	dhsa_rat ame: full=succinate dehydrogenase flavoprotein mitochondrial ame: full=flavoprotein subunit of complex ii short=fp flags: precursor	3088	gi|52782765|sp|Q920L2.1|DHSA_RATRecName: Full=Succinate dehydrogenase [ubiquinone] flavoprotein subunit, mitochondrial; AltName: Full=Flavoprotein subunit of complex II; Short=Fp; Flags: Precursor	Q920L2	0	89	880.167	541	485
THRIPS_11_08_2011_02655	s29a2_human ame: full=equilibrative nucleoside transporter 2 ame: full=36 kda nucleolar protein hnp36 ame: full=delayed-early response protein 12 ame: full=equilibrative nitrobenzylmercaptopurine riboside-insensitive nucleoside transporter short=equilibrative nbmpr-insensitive nucleoside transporter ame: full=hydrophobic nucleolar 36 kda ame: full=nucleoside ei-type ame: full=solute carrier famil…	5388	gi|116242781|sp|Q14542.3|S29A2_HUMANRecName: Full=Equilibrative nucleoside transporter 2; AltName: Full=36 kDa nucleolar protein HNP36; AltName: Full=Delayed-early response protein 12; AltName: Full=Equilibrative nitrobenzylmercaptopurine riboside-insensitive nucleoside transporter; Short=Equilibrative NBMPR-insensitive nucleoside transporter; AltName: Full=Hydrophobic nucleolar protein, 36 kDa; …	Q14542	4.91879e-49	47	197.978	450	215
THRIPS_11_08_2011_02656	2aba_drome ame: full=protein phosphatase pp2a 55 kda regulatory subunit short=pr55 ame: full=protein phosphatase pp2a regulatory subunit b ame: full=protein twins	5028	gi|543716|sp|P36872.1|2ABA_DROMERecName: Full=Protein phosphatase PP2A 55 kDa regulatory subunit; Short=PR55; AltName: Full=Protein phosphatase PP2A regulatory subunit B; AltName: Full=Protein twins	P36872	0	93	768.459	434	404
THRIPS_11_08_2011_02657	PREDICTED: similar to CG33229-PA [Apis mellifera]	7541	gi|110757153|ref|XP_001122140.1|PREDICTED: similar to CG33229-PA [Apis mellifera]	XP_001122140	1.9435e-10	55	74.7146	118	66
THRIPS_11_08_2011_02658	cstn1_drome ame: full=calsyntenin-1 ame: full=cadherin-102f flags: precursor	6830	gi|27923758|sp|Q9V498.2|CSTN1_DROMERecName: Full=Calsyntenin-1; AltName: Full=Cadherin-102F; Flags: Precursor	Q9V498	0	60	711.064	918	552
THRIPS_11_08_2011_02659	vigln_mouse ame: full=vigilin ame: full=high density lipoprotein-binding protein short=hdl-binding protein	5444	gi|46396970|sp|Q8VDJ3.1|VIGLN_MOUSERecName: Full=Vigilin; AltName: Full=High density lipoprotein-binding protein; Short=HDL-binding protein	Q8VDJ3	0	71	1260.36	1228	883
THRIPS_11_08_2011_02660	trea_apime ame: full=trehalase ame: full= -trehalase ame: full= -trehalose glucohydrolase flags: precursor	3563	gi|166231328|sp|A8J4S9.1|TREA_APIMERecName: Full=Trehalase; AltName: Full=Alpha,alpha-trehalase; AltName: Full=Alpha,alpha-trehalose glucohydrolase; Flags: Precursor	A8J4S9	4.73368e-162	67	572.778	536	362
THRIPS_11_08_2011_02662	chd1_bommo ame: full=chromodomain-helicase-dna-binding protein 1 short=chd-1 ame: full=atp-dependent helicase chd1	2306	gi|269969346|sp|A9X4T1.1|CHD1_BOMMORecName: Full=Chromodomain-helicase-DNA-binding protein 1; Short=CHD-1; AltName: Full=ATP-dependent helicase CHD1	A9X4T1	1.26111e-72	67	275.018	314	211
THRIPS_11_08_2011_02663	ngef_rat ame: full=ephexin-1 ame: full=eph-interacting exchange protein ame: full=neuronal guanine nucleotide exchange factor	3349	gi|114152091|sp|Q5BKC9.2|NGEF_RATRecName: Full=Ephexin-1; AltName: Full=Eph-interacting exchange protein; AltName: Full=Neuronal guanine nucleotide exchange factor	Q5BKC9	7.47119e-93	59	342.813	495	293
THRIPS_11_08_2011_02664	chst5_human ame: full=carbohydrate sulfotransferase 5 ame: full=galactose n-acetylglucosamine n-acetylglucosamine 6-o-sulfotransferase 4-alpha short=gst4-alpha ame: full=intestinal n-acetylglucosamine-6-o-sulfotransferase short=i- c6st short=intestinal c-6-sulfotransferase short=hign6st ame: full=n-acetylglucosamine 6-o-sulfotransferase 3 short= c6st-3 short=gn6st-3	3661	gi|239938912|sp|Q9GZS9.3|CHST5_HUMANRecName: Full=Carbohydrate sulfotransferase 5; AltName: Full=Galactose/N-acetylglucosamine/N-acetylglucosamine 6-O-sulfotransferase 4-alpha; Short=GST4-alpha; AltName: Full=Intestinal N-acetylglucosamine-6-O-sulfotransferase; Short=I-GlcNAc6ST; Short=Intestinal GlcNAc-6-sulfotransferase; Short=hIGn6ST; AltName: Full=N-acetylglucosamine 6-O-sulfotransferase 3; S…	Q9GZS9	1.80425e-23	44	112.464	336	150
THRIPS_11_08_2011_02665	alg12_drome ame: full=probable dolichyl-p-man:man c -pp-dolichyl-alpha- -mannosyltransferase ame: full=asparagine-linked glycosylation protein 12 homolog ame: full=mannosyltransferase alg12 homolog	4318	gi|45476988|sp|Q9VH78.1|ALG12_DROMERecName: Full=Probable dolichyl-P-Man:Man(7)GlcNAc(2)-PP-dolichyl-alpha-1,6-mannosyltransferase; AltName: Full=Asparagine-linked glycosylation protein 12 homolog; AltName: Full=Mannosyltransferase ALG12 homolog	Q9VH78	7.69918e-122	70	439.499	482	341
THRIPS_11_08_2011_02666	ncor1_human ame: full=nuclear receptor corepressor 1 short=n- short=n- 1	1865	gi|47117817|sp|O75376.2|NCOR1_HUMANRecName: Full=Nuclear receptor corepressor 1; Short=N-CoR; Short=N-CoR1	O75376	1.45638e-84	62	314.309	422	262
THRIPS_11_08_2011_02667	alat2_danre ame: full=alanine aminotransferase 2-like short=alt2 ame: full=glutamate pyruvate transaminase 2 short=gpt 2 ame: full=glutamic--alanine transaminase 2 ame: full=glutamic--pyruvic transaminase 2	2749	gi|161789027|sp|Q6NYL5.2|ALAT2_DANRERecName: Full=Alanine aminotransferase 2-like; Short=ALT2; AltName: Full=Glutamate pyruvate transaminase 2; Short=GPT 2; AltName: Full=Glutamic--alanine transaminase 2; AltName: Full=Glutamic--pyruvic transaminase 2	Q6NYL5	2.017e-165	74	583.563	480	359
THRIPS_11_08_2011_02668	pdia6_rat ame: full=protein disulfide-isomerase a6 ame: full=calcium-binding protein 1 short= 1 ame: full=protein disulfide isomerase p5 ame: full=thioredoxin domain-containing protein 7 flags: precursor	1821	gi|62296810|sp|Q63081.2|PDIA6_RATRecName: Full=Protein disulfide-isomerase A6; AltName: Full=Calcium-binding protein 1; Short=CaBP1; AltName: Full=Protein disulfide isomerase P5; AltName: Full=Thioredoxin domain-containing protein 7; Flags: Precursor	Q63081	2.29945e-151	76	536.184	417	321
THRIPS_11_08_2011_02670	fbxl7_mouse ame: full=f-box lrr-repeat protein 7 ame: full=f-box and leucine-rich repeat protein 7	1039	gi|81909453|sp|Q5BJ29.1|FBXL7_MOUSERecName: Full=F-box/LRR-repeat protein 7; AltName: Full=F-box and leucine-rich repeat protein 7	Q5BJ29	3.25337e-10	44	66.2402	259	114
THRIPS_11_08_2011_02672	larp_drome ame: full=la-related protein ame: full=dlarp	820	gi|73621137|sp|Q9VAW5.4|LARP_DROMERecName: Full=La-related protein; AltName: Full=dlarp	Q9VAW5	5.07553e-79	73	294.278	273	201
THRIPS_11_08_2011_02674	npc1_human ame: full=niemann-pick c1 protein flags: precursor	1549	gi|83305902|sp|O15118.2|NPC1_HUMANRecName: Full=Niemann-Pick C1 protein; Flags: Precursor	O15118	1.48993e-31	49	137.887	270	133
THRIPS_11_08_2011_02675	dym_drops ame: full=dymeclin	1578	gi|121989186|sp|Q293C2.1|DYM_DROPSRecName: Full=Dymeclin	Q293C2	8.83274e-80	73	298.13	290	213
[truncated: 10,937 more rows]
