# Supplementary material for: Analysis of the Salivary Gland Transcriptome of Frankliniella occidentalis
Source: PLoS One. 2014 Apr 15;9(4):e94447. doi: 10.1371/journal.pone.0094447 (PMC3988053; doi:10.1371/journal.pone.0094447)
Supplement: Table S5 — Screening of the Frankliniella occidentalis sialotranscriptome known insect salivary proteins, information includes: the name of the reference gene used to search the sialotranscriptome, protein name, F. occidentalis sialotranscriptome contig name that matched the reference gene, (E-value≤1.0E−6) and the E-value. (XLSX) [file pone.0094447.s005.xlsx]

## Sheet: genes of interest
>lcl|XM_001950957.2_cdsid_XP_001950992.1 [gene=LOC100168209] [protein=aldehyde dehydrogenase, dimeric NADP-preferring-like isoform 1] [protein_id=XP_001950992.1] [location=400..1908]
aldehyde dehydrogenase
THRIPS_11_08_2011_23358	0
THRIPS_11_08_2011_23359	0
THRIPS_11_08_2011_23357	0
THRIPS_11_08_2011_23355	8e-151
THRIPS_11_08_2011_23356	1e-49
THRIPS_11_08_2011_11869	6e-33
THRIPS_11_08_2011_03548	5e-17
THRIPS_11_08_2011_01204	5e-13
THRIPS_11_08_2011_00992	4e-10
THRIPS_11_08_2011_06836	4e-06
THRIPS_11_08_2011_05774	4e-06
>gi|239791502|dbj|AK342010.1| Acyrthosiphon pisum ACYPI004887 mRNA, clone: 212M21, complete cds, full-insert cDNA sequence based on the ESTs (5'-EST:EX633219, 3'-EST:EX634295)
alpha amylase
THRIPS_11_08_2011_13988	7e-150
THRIPS_11_08_2011_13989	2e-147
>gi|328708805|ref|XM_001952596.2| PREDICTED: Acyrthosiphon pisum lysosomal alpha-glucosidase-like (LOC100160797), mRNA
alpha glucosidase
THRIPS_11_08_2011_24191	0
THRIPS_11_08_2011_05009	1e-43
>gi|58585089|ref|NM_001011574.1| Apis mellifera glucose oxidase (LOC406081), mRNA
glucose oxidase
THRIPS_11_08_2011_23366	3e-27
>gi|328696525|ref|XM_001952313.2| PREDICTED: Acyrthosiphon pisum carboxypeptidase D-like (LOC100161290), mRNA
carboxypeptidase
THRIPS_11_08_2011_01183	0
THRIPS_11_08_2011_04062	0
THRIPS_11_08_2011_01182	1e-110
THRIPS_11_08_2011_02350	2e-41
>gi|328714466|ref|XM_001943003.2| PREDICTED: Acyrthosiphon pisum probable chitinase 3-like (LOC100169480), mRNA
chitinase
THRIPS_11_08_2011_05246	5e-39
THRIPS_11_08_2011_07955	4e-38
THRIPS_11_08_2011_01492	7e-08
>gi|328722963|ref|XM_003247669.1| PREDICTED: Acyrthosiphon pisum chymotrypsin-like protease CTRL-1-like (LOC100572020), mRNA
chymotrypsin protease
no sig
>gi|328708498|ref|XM_001944739.2| PREDICTED: Acyrthosiphon pisum endoglucanase E-4-like (LOC100161517), mRNA
endoglucanase
none
gi|257219513|gb|ACV50414.1| endo-beta-1,4-glucanase [Cryptopygus antarcticus]
>THRIPS_11_08_2011_26603	2e-63
>THRIPS_11_08_2011_26600	4e-76
>THRIPS_11_08_2011_00572	8e-78
THRIPS_11_08_2011_00574	3e-74
>THRIPS_11_08_2011_26602	4e-74
>gi|328725179|ref|XM_001943179.2| PREDICTED: Acyrthosiphon pisum esterase FE4-like (LOC100168312), mRNA
esterase
THRIPS_11_08_2011_11707	2e-27
THRIPS_11_08_2011_15825	2e-27
THRIPS_11_08_2011_04775	2e-14
>gi|328720714|ref|XM_001948455.2| PREDICTED: Acyrthosiphon pisum glucose dehydrogenase [acceptor]-like (LOC100162041), mRNA
glucose dehydrogenase
THRIPS_11_08_2011_23366	2e-43
THRIPS_11_08_2011_17654	9e-10
>gi|328705720|ref|XM_001952639.2| PREDICTED: Acyrthosiphon pisum uncharacterized family 31 glucosidase KIAA1161-like (LOC100164540), mRNA
glucosidase
THRIPS_11_08_2011_17411	6e-29	alpha glucosidase like
THRIPS_11_08_2011_24191	5e-09	alpha glucosidase like
>gi|328711953|ref|XM_001945571.2| PREDICTED: Acyrthosiphon pisum lactase-phlorizin hydrolase-like, transcript variant 1 (LOC100159178), mRNA
beta glucosidase like
THRIPS_11_08_2011_26857	8e-58
THRIPS_11_08_2011_00090	4e-55
THRIPS_11_08_2011_08489	4e-39
THRIPS_11_08_2011_22997	4e-37
THRIPS_11_08_2011_01575	2e-34
THRIPS_11_08_2011_21606	3e-29
THRIPS_11_08_2011_16212	3e-26
THRIPS_11_08_2011_09991	9e-16
THRIPS_11_08_2011_09579	1e-13
THRIPS_11_08_2011_01524	1e-13
THRIPS_11_08_2011_00089	1e-13
THRIPS_11_08_2011_19862	3e-12
THRIPS_11_08_2011_13467	1e-11
THRIPS_11_08_2011_03550	1e-11
THRIPS_11_08_2011_31094	4e-09
THRIPS_11_08_2011_31206	5e-08
>gi|328714831|ref|XM_001946189.2| PREDICTED: Acyrthosiphon pisum laccase-7-like (LOC100161156), mRNA
laccase
no hits found
>gi|328719665|ref|XM_003246777.1| PREDICTED: Acyrthosiphon pisum lipase 3-like, transcript variant 1 (LOC100163247), mRNA
lipase
THRIPS_11_08_2011_00446	6e-58
THRIPS_11_08_2011_09538	6e-42
THRIPS_11_08_2011_09090	1e-20
gi|328724590|ref|XM_001949624.2| PREDICTED: Acyrthosiphon pisum probable maltase-like (LOC100162137), partial mRNA
maltase
THRIPS_11_08_2011_26249	1e-79
THRIPS_11_08_2011_18252	1e-34
THRIPS_11_08_2011_26259	4e-18
THRIPS_11_08_2011_03512	3e-12
gi|328718994|ref|XM_001946662.2| PREDICTED: Acyrthosiphon pisum ATP-dependent zinc metalloprotease YME1 homolog (LOC100169567), mRNA
metalloprotease
THRIPS_11_08_2011_21520	2e-86
THRIPS_11_08_2011_24944	3e-60
THRIPS_11_08_2011_00131	1e-32
THRIPS_11_08_2011_23009	2e-31
THRIPS_11_08_2011_22747	2e-29
THRIPS_11_08_2011_21483	2e-29
THRIPS_11_08_2011_22016	6e-29
THRIPS_11_08_2011_03447	5e-28
THRIPS_11_08_2011_21523	4e-27
THRIPS_11_08_2011_01108	3e-21
THRIPS_11_08_2011_26958	2e-20
THRIPS_11_08_2011_02445	7e-20
THRIPS_11_08_2011_23918	2e-19
THRIPS_11_08_2011_04051	2e-18
THRIPS_11_08_2011_24659	5e-18
THRIPS_11_08_2011_04052	6e-18
THRIPS_11_08_2011_29037	4e-17
THRIPS_11_08_2011_20523	2e-16
THRIPS_11_08_2011_08231	5e-14
THRIPS_11_08_2011_26877	9e-14
THRIPS_11_08_2011_19894	2e-13
THRIPS_11_08_2011_23006	2e-12
THRIPS_11_08_2011_02567	5e-10
THRIPS_11_08_2011_17612	6e-09
THRIPS_11_08_2011_16276	5e-07
THRIPS_11_08_2011_01607	1e-06
THRIPS_11_08_2011_19105	7e-06
gi|328724425|ref|XM_001947291.2| PREDICTED: Acyrthosiphon pisum soluble calcium-activated nucleotidase 1-like (LOC100166504), mRNA
nucleotidase
THRIPS_11_08_2011_04515	8e-58
pectin lyase
gi|489265950|ref|WP_003173757.1| pectin lyase [Pseudomonas fluorescens]
THRIPS_11_08_2011_00750	3e-52
THRIPS_11_08_2011_0528	1e-43
>gi|240849258|ref|NM_001162047.1| Acyrthosiphon pisum regucalcin-like (LOC100162135), mRNA
regulacin
THRIPS_11_08_2011_23669	2e-17
>gi|328721535|ref|XM_003247283.1| PREDICTED: Acyrthosiphon pisum serine protease snake-like, transcript variant 1 (LOC100569915), mRNA
serine protease
THRIPS_11_08_2011_01346	1e-64
THRIPS_11_08_2011_22463	4e-42
THRIPS_11_08_2011_00440	1e-09
THRIPS_11_08_2011_17496	8e-08
>gi|328709832|ref|XM_001947141.2| PREDICTED: Acyrthosiphon pisum short/branched chain specific acyl-CoA dehydrogenase, mitochondrial-like (LOC100161123), mRNA
short chain acyl-CoA dehydrogenase
THRIPS_11_08_2011_01574	1e-63
THRIPS_11_08_2011_02544	9e-07
THRIPS_11_08_2011_02861	3e-32
THRIPS_11_08_2011_03083	3e-49
THRIPS_11_08_2011_07581	1e-180
THRIPS_11_08_2011_20982	5e-09
THRIPS_11_08_2011_22097	5e-170
THRIPS_11_08_2011_22098	1e-170
THRIPS_11_08_2011_22100	5e-175
THRIPS_11_08_2011_22759	2e-76
THRIPS_11_08_2011_24927	1e-67
>gi|81159207|gb|DQ223541.1| Acyrthosiphon pisum sucrase (S1) mRNA, complete cds
sucrase
THRIPS_11_08_2011_26249	3e-139
THRIPS_11_08_2011_18252	5e-110
THRIPS_11_08_2011_26259	2e-59
THRIPS_11_08_2011_22955	4e-09
